# Supplementary material for: Longitudinal genome-wide DNA methylation analysis uncovers persistent early-life DNA methylation changes
Source: PubMed Central journal article supplement (PMC6327427; doi:10.1186/s12967-018-1751-9), 2019-01-09

**cg00002033**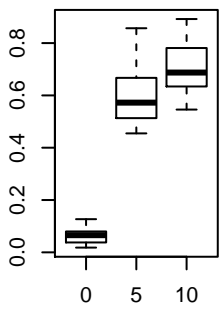**cg01323777**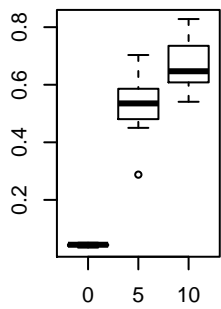**cg01331772**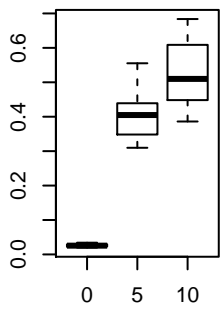**cg01511232**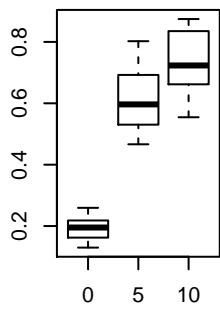**cg01577707**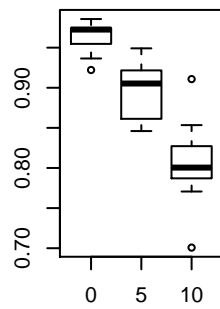**cg01654035**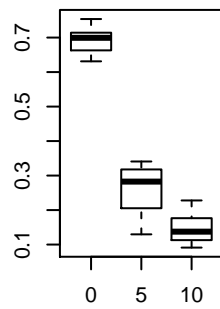**cg02920129**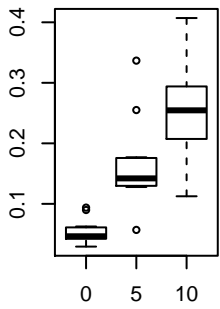**cg03465600**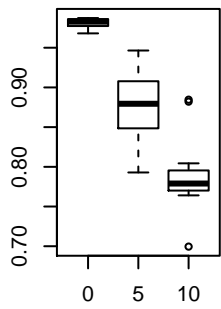**cg03830443**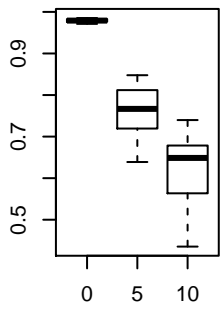**cg03853945**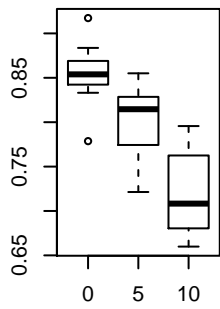**cg05346619**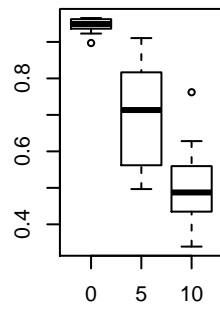**cg05498680**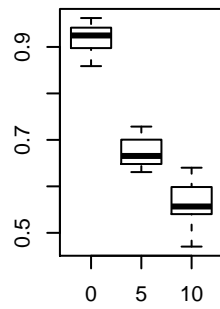**cg07061387**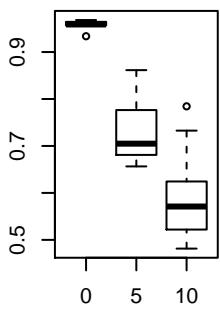**cg07547765**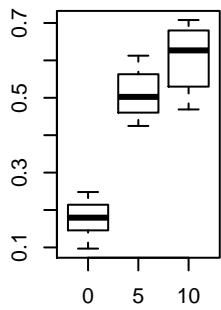**cg07690222**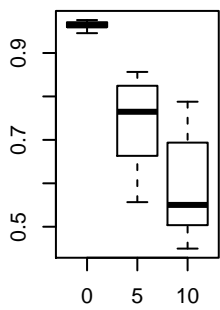**cg10097598**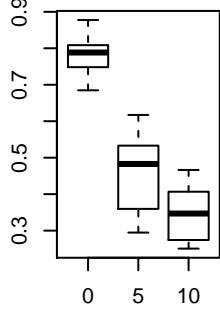**cg11047325**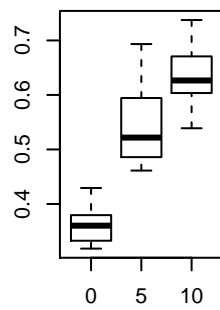**cg12024906**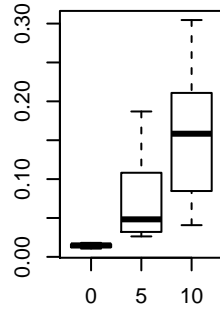**cg12628061**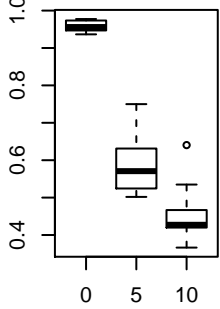**cg13254363**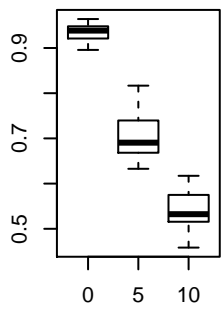**cg13329407**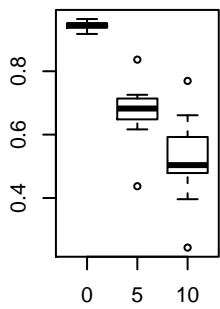**cg13420364**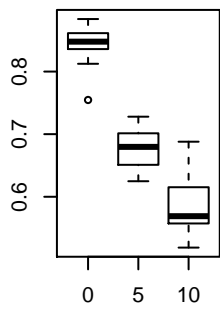**cg13949829**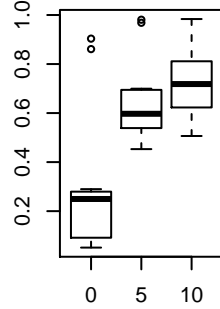**cg16022195**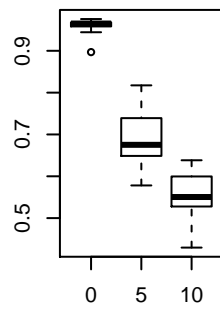**cg17238334**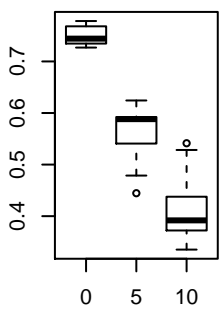**cg18311495**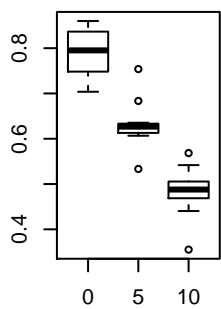**cg18647570**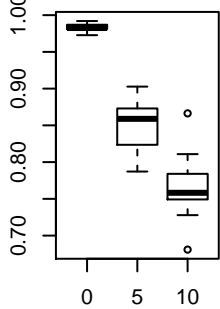**cg19076536**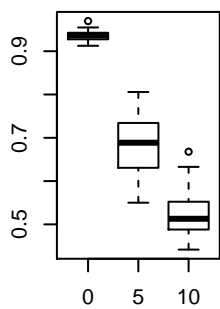**cg19509778**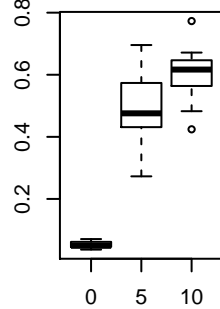**cg19567415**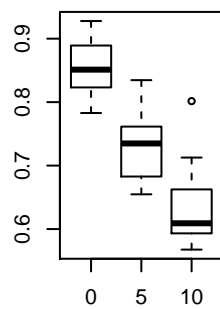**cg22398226**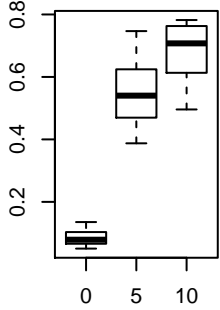**cg23201812**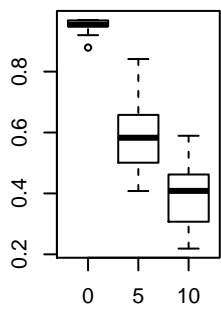**cg23669081**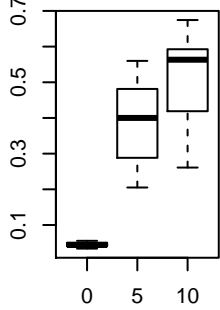**cg24199558**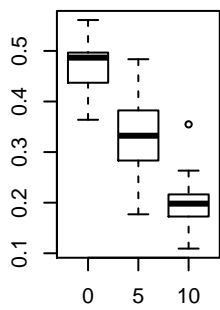**cg24348981**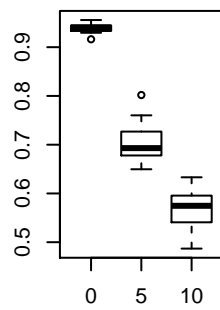**cg26617011**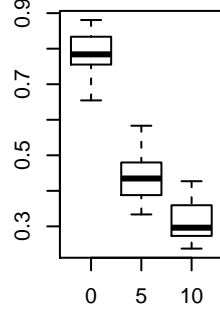

Supplement: 12967_2018_1751_MOESM12_ESM.pdf [file 12967_2018_1751_MOESM12_ESM.pdf]
