# Supplementary material for: Longitudinal genome-wide DNA methylation analysis uncovers persistent early-life DNA methylation changes
Source: PubMed Central journal article supplement (PMC6327427; doi:10.1186/s12967-018-1751-9), 2019-01-09
Supplement: 12967_2018_1751_MOESM5_ESM.pdf [file 12967_2018_1751_MOESM5_ESM.pdf]

hyper vs hypo changes 0 vs 5

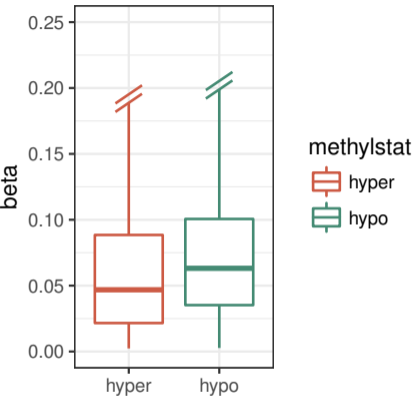

**Wilcoxon test**

**p.val < 0.001**

**Cliff's delta = 0.2**

**Median difference = 0.02 (2%)**

hyper vs hypo changes 5 vs 10

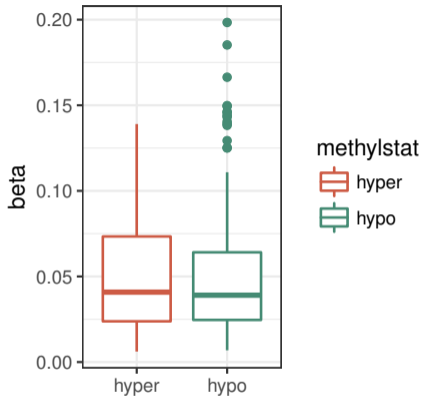

**Wilcoxon test**

**p.val > 0.75 (non significant)**

**Cliff's delta = 0.02**

**Median difference = 0.002 (0.2%)**
