# Supplementary material for: Longitudinal genome-wide DNA methylation analysis uncovers persistent early-life DNA methylation changes
Source: PubMed Central journal article supplement (PMC6327427; doi:10.1186/s12967-018-1751-9), 2019-01-09

**a**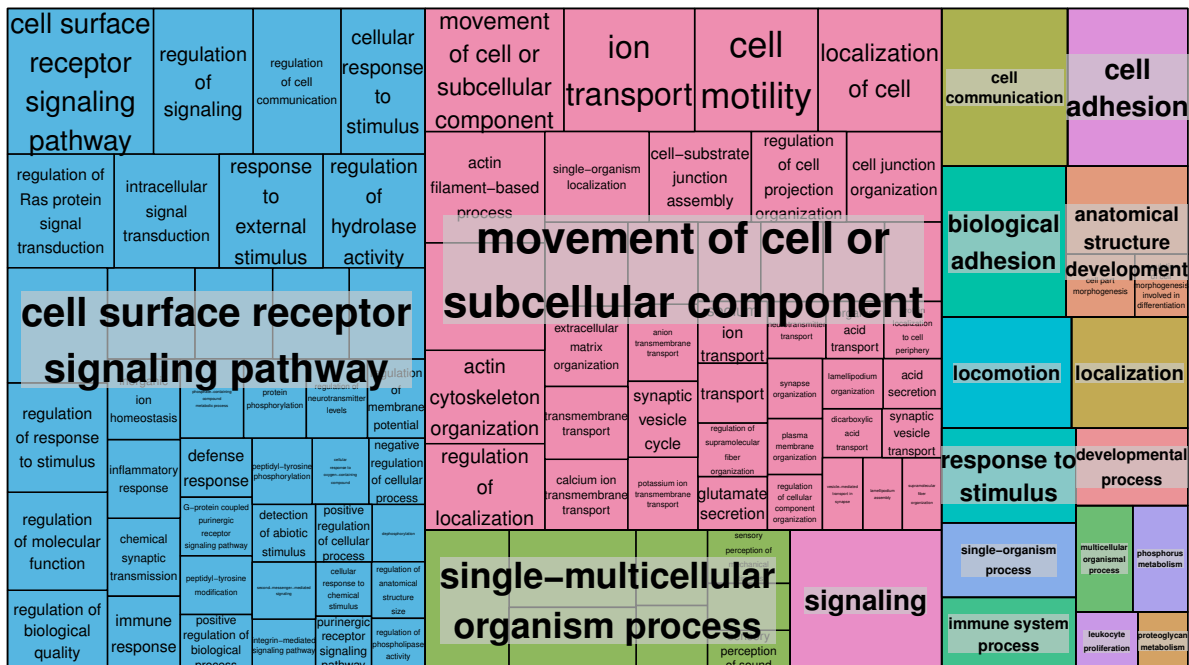**b**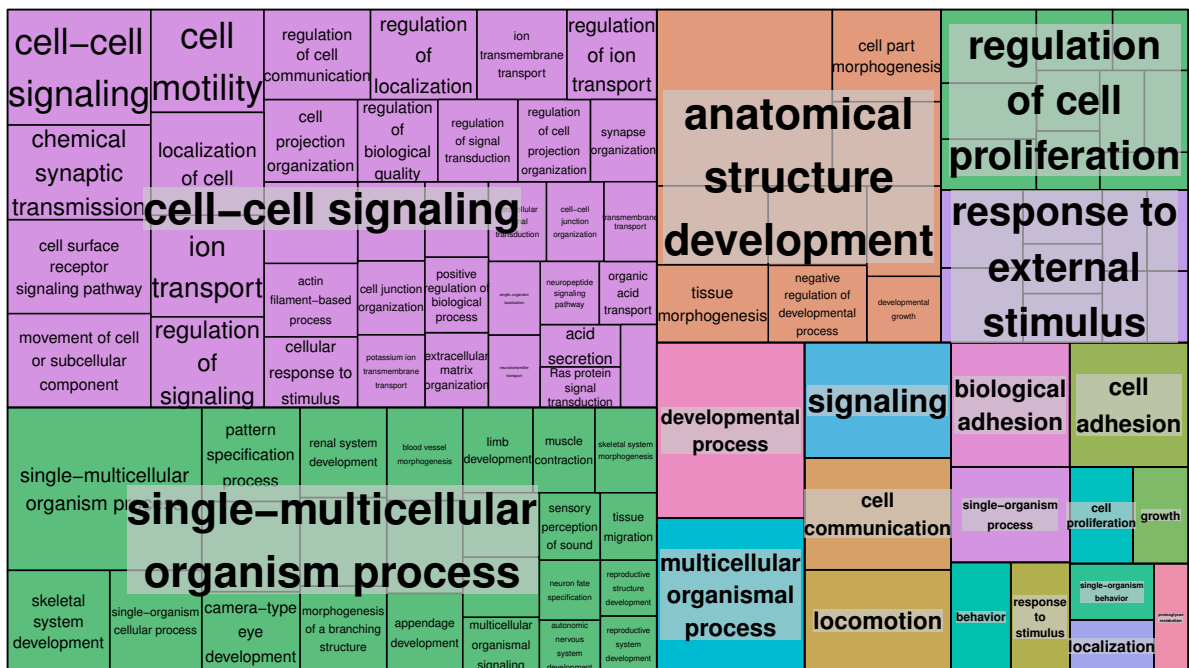**c**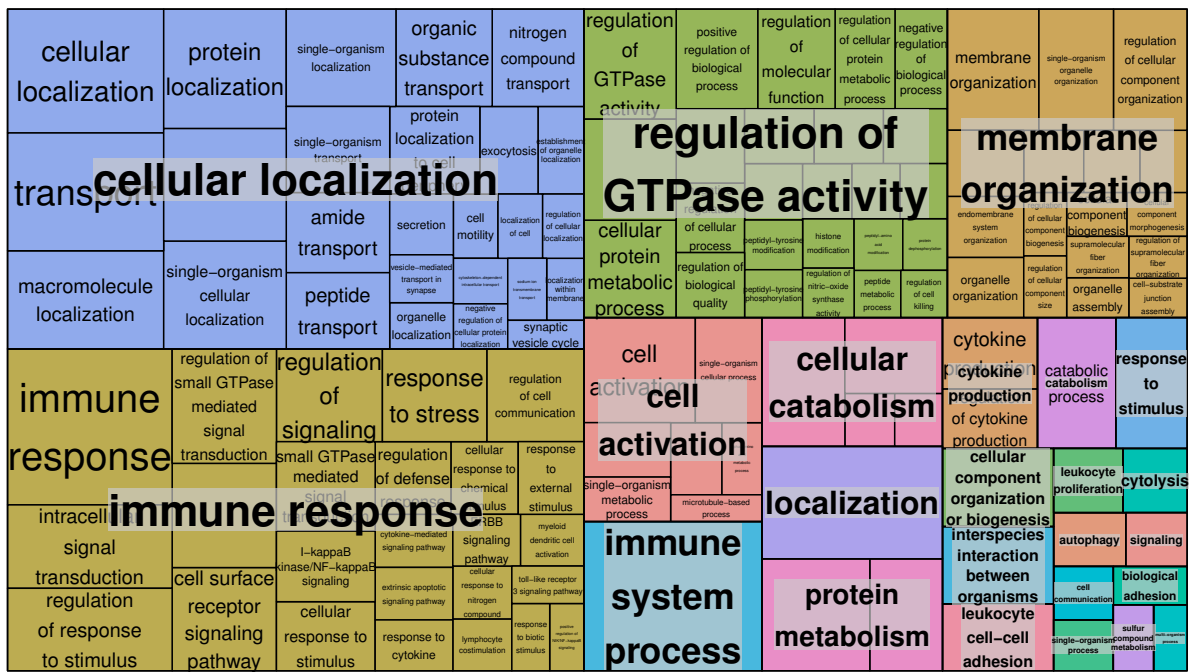

Supplement: 12967_2018_1751_MOESM10_ESM.pdf [file 12967_2018_1751_MOESM10_ESM.pdf]
