# Supplementary material for: Longitudinal genome-wide DNA methylation analysis uncovers persistent early-life DNA methylation changes
Source: PubMed Central journal article supplement (PMC6327427; doi:10.1186/s12967-018-1751-9), 2019-01-09

**a****hyper 0 vs 5 promoter** 1200 significant terms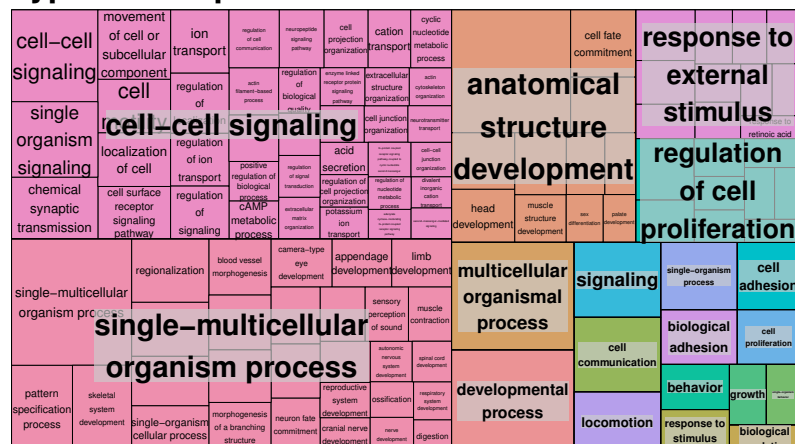**hyper 0 vs 5 exon** 150 significant terms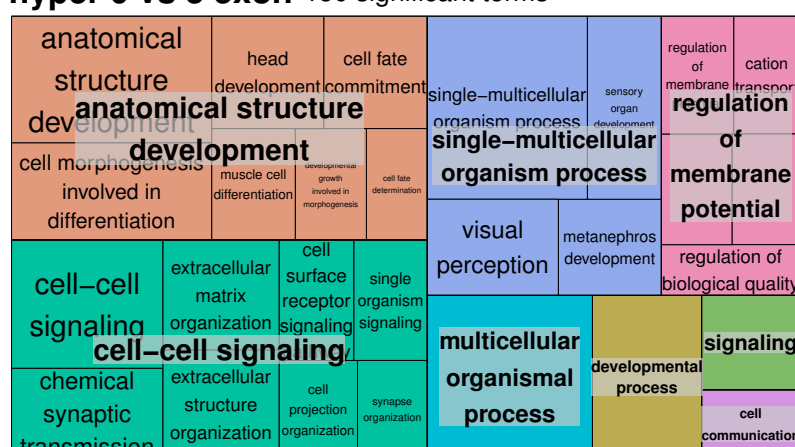**hyper 0 vs 5 gene body** 280 significant terms (exon + intron + UTR + downstream)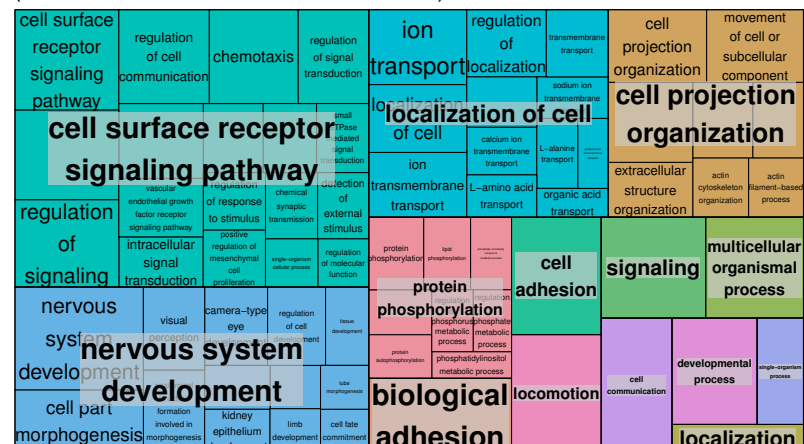**hyper 0 vs 5 intron** 197 significant terms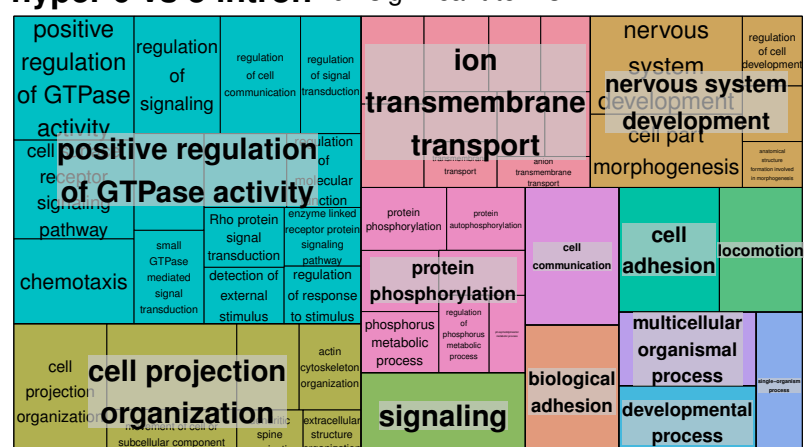**b****hypo 0 vs 5 promoter** 356 significant terms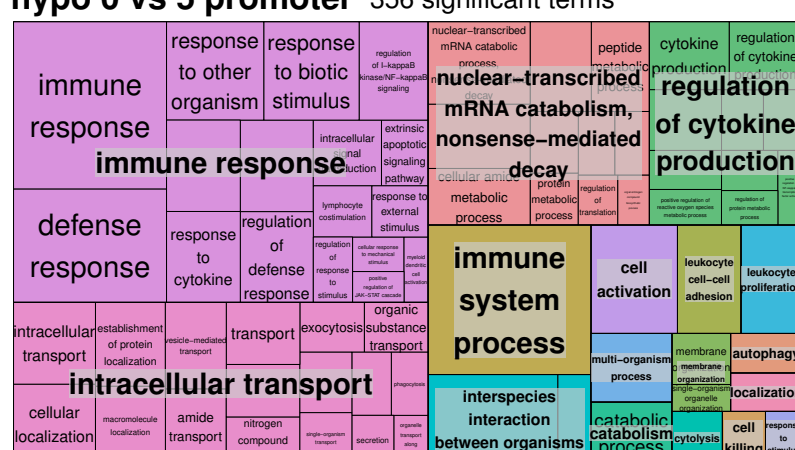**hypo 0 vs 5 gene body** 267 significant terms (exon + intron + UTR + downstream)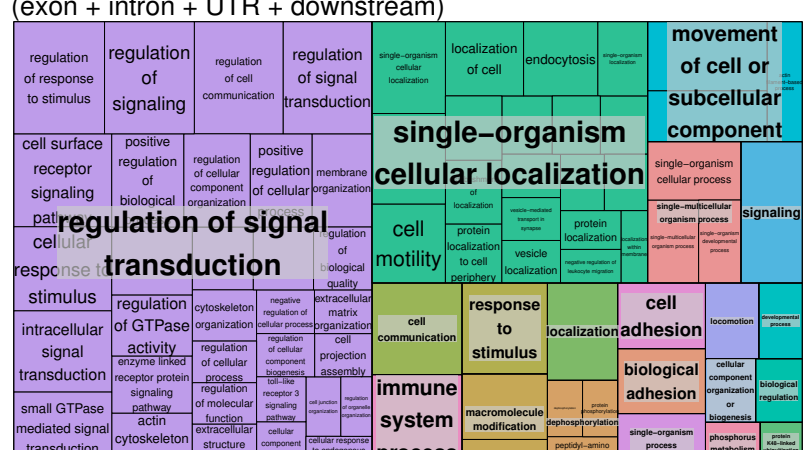**hypo 0 vs 5 exon** 0 significant terms**hypo 0 vs 5 intron** 228 significant terms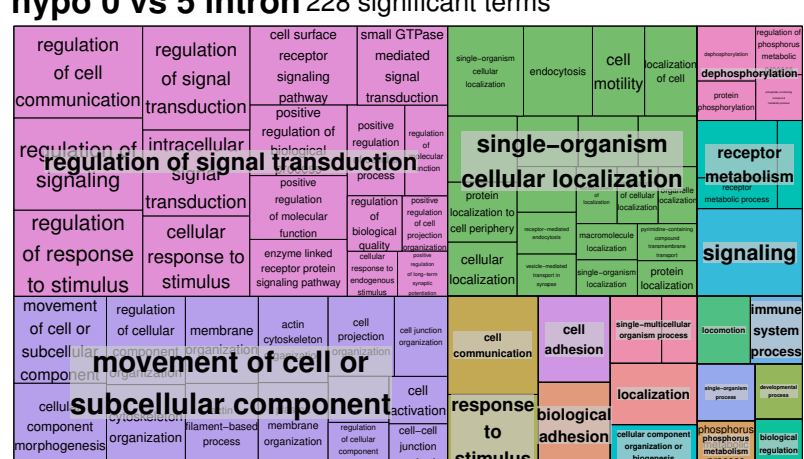

Supplement: 12967_2018_1751_MOESM11_ESM.pdf [file 12967_2018_1751_MOESM11_ESM.pdf]
