# Supplementary material for: Longitudinal genome-wide DNA methylation analysis uncovers persistent early-life DNA methylation changes
Source: J Transl Med. 2019 Jan 9;17:15. doi: 10.1186/s12967-018-1751-9 (PMC6327427; doi:10.1186/s12967-018-1751-9)
Supplement: Supplementary file 8 — Additional file 8: Table S4. Chromatin state enrichment analysis of 0→5 and 5→10 dmCpGs. Enrichments were calculated based on differences between the dmCpGs obtained in each of the analyses and the hg19 chromatin segmentation regions (ChromHMM, 18 states) obtained from Roadmap and ENCODE consortia. A custom LOLA database including information related to the chromatin states in the different tissues/cell lines and corresponding array backgrounds were used for the correct enrichment calculation. [file 12967_2018_1751_MOESM8_ESM.xlsx]

## Sheet: 0vs5_hyper_dmCpGs
userSet	dbSet	collection	pValueLog	logOddsRatio	support	rnkPV	rnkLO	rnkSup	maxRnk	meanRnk	b	c	d	description	cellType	tissue	antibody	treatment	dataSource	filename	qValue	size
hyper	46	chromHMM_state1_TssA	0	0.657211	6595	1	3	1	3	1.67	114963	53154	608947	chromHMM_state1_TssA Brain_Anterior_Caudate human	Brain_Anterior_Caudate	NA	human	BRAIN	PrimaryTissue	1_TssA_E068.bed	1	30112
hyper	50	chromHMM_state1_TssA	0	0.669159	6322	1	2	2	2	1.67	108777	53427	615133	chromHMM_state1_TssA Brain_Mid_Frontal_Lobe human	Brain_Mid_Frontal_Lobe	NA	human	BRAIN	PrimaryTissue	1_TssA_E073.bed	1	26727
hyper	45	chromHMM_state1_TssA	0	0.627553	5354	1	4	5	5	3.33	98148	54395	625762	chromHMM_state1_TssA Brain_Angular_Gyrus human	Brain_Angular_Gyrus	NA	human	BRAIN	PrimaryTissue	1_TssA_E067.bed	1	25657
hyper	75	chromHMM_state1_TssA	0	0.588038	5904	1	7	3	7	3.67	113771	53845	610139	chromHMM_state1_TssA Right_Atrium human	Right_Atrium	NA	human	HEART	PrimaryTissue	1_TssA_E104.bed	1	22684
hyper	48	chromHMM_state1_TssA	0	0.560614	5892	1	10	4	10	5	118203	53857	605707	chromHMM_state1_TssA Brain_Hippocampus_Middle human	Brain_Hippocampus_Middle	NA	human	BRAIN	PrimaryTissue	1_TssA_E071.bed	1	27783
hyper	49	chromHMM_state1_TssA	0	0.596985	4761	1	5	10	10	5.33	91693	54988	632217	chromHMM_state1_TssA Brain_Inferior_Temporal_Lobe human	Brain_Inferior_Temporal_Lobe	NA	human	BRAIN	PrimaryTissue	1_TssA_E072.bed	1	26576
hyper	59	chromHMM_state1_TssA	0	0.558224	5309	1	12	6	12	6.33	107659	54440	616251	chromHMM_state1_TssA Pancreatic_Islets human	Pancreatic_Islets	NA	human	PANCREAS	PrimaryTissue	1_TssA_E087.bed	1	21200
hyper	43	chromHMM_state1_TssA	0	0.567859	4716	1	9	11	11	7	94920	55033	628990	chromHMM_state1_TssA Aorta human	Aorta	NA	human	VASCULAR	PrimaryTissue	1_TssA_E065.bed	1	19485
hyper	68	chromHMM_state1_TssA	0	0.58998	4435	1	6	14	14	7	86610	55314	637300	chromHMM_state1_TssA Ovary human	Ovary	NA	human	OVARY	PrimaryTissue	1_TssA_E097.bed	1	17658
hyper	51	chromHMM_state1_TssA	0	0.519203	4896	1	15	8	15	8	106194	54853	617716	chromHMM_state1_TssA Brain_Substantia_Nigra human	Brain_Substantia_Nigra	NA	human	BRAIN	PrimaryTissue	1_TssA_E074.bed	1	23032
hyper	53	chromHMM_state1_TssA	0	0.516896	4804	1	16	9	16	8.67	104735	54945	619175	chromHMM_state1_TssA Colon_Smooth_Muscle human	Colon_Smooth_Muscle	NA	human	GI_COLON	PrimaryTissue	1_TssA_E076.bed	1	21265
hyper	47	chromHMM_state1_TssA	0	0.527683	4588	1	14	12	14	9	98569	55161	625341	chromHMM_state1_TssA Brain_Cingulate_Gyrus human	Brain_Cingulate_Gyrus	NA	human	BRAIN	PrimaryTissue	1_TssA_E069.bed	1	24328
hyper	66	chromHMM_state1_TssA	0	0.494326	4932	1	19	7	19	9	111472	54817	612438	chromHMM_state1_TssA Left_Ventricle human	Left_Ventricle	NA	human	HEART	PrimaryTissue	1_TssA_E095.bed	1	20172
hyper	74	chromHMM_state1_TssA	0	0.510472	4542	1	17	13	17	10.3	100479	55207	623431	chromHMM_state1_TssA Rectal_Smooth_Muscle human	Rectal_Smooth_Muscle	NA	human	GI_RECTUM	PrimaryTissue	1_TssA_E103.bed	1	21830
hyper	2	chromHMM_state1_TssA	0	0.575032	3596	1	8	25	25	11.3	72541	56153	651369	chromHMM_state1_TssA H1_BMP4_Derived_Mesendoderm_Cultured_Cells human	H1_BMP4_Derived_Mesendoderm_Cultured_Cells	NA	human	ESC_DERIVED	ESCDerived	1_TssA_E004.bed	1	14343
hyper	9	chromHMM_state1_TssA	0	0.537573	3667	1	13	22	22	12	78503	56082	645407	chromHMM_state1_TssA hESC_Derived_CD56+_Mesoderm_Cultured_Cells human	hESC_Derived_CD56+_Mesoderm_Cultured_Cells	NA	human	ESC_DERIVED	ESCDerived	1_TssA_E013.bed	1	13466
hyper	54	chromHMM_state1_TssA	0	0.490576	3849	1	20	19	20	13.3	89100	55900	634810	chromHMM_state1_TssA Duodenum_Smooth_Muscle human	Duodenum_Smooth_Muscle	NA	human	GI_DUODENUM	PrimaryTissue	1_TssA_E078.bed	1	24279
hyper	72	chromHMM_state1_TssA	0	0.47119	4324	1	24	16	24	13.7	102834	55425	621076	chromHMM_state1_TssA Rectal_Mucosa.Donor_29 human	Rectal_Mucosa.Donor_29	NA	human	GI_RECTUM	PrimaryTissue	1_TssA_E101.bed	1	31869
hyper	71	chromHMM_state1_TssA	0	0.45222	4355	1	27	15	27	14.3	107215	55394	616695	chromHMM_state1_TssA Psoas_Muscle human	Psoas_Muscle	NA	human	MUSCLE	PrimaryTissue	1_TssA_E100.bed	1	18548
hyper	95	chromHMM_state1_TssA	0	0.478565	3691	1	22	21	22	14.7	87553	56058	636357	chromHMM_state1_TssA NHDF-Ad_Adult_Dermal_Fibroblasts human	NHDF-Ad_Adult_Dermal_Fibroblasts	NA	human	SKIN	PrimaryCulture	1_TssA_E126.bed	1	20033
hyper	76	chromHMM_state1_TssA	0	0.448862	4244	1	28	17	28	15.3	105368	55505	618542	chromHMM_state1_TssA Right_Ventricle human	Right_Ventricle	NA	human	HEART	PrimaryTissue	1_TssA_E105.bed	1	20738
hyper	10	chromHMM_state1_TssA	0	0.472266	3632	1	23	24	24	16	87252	56117	636658	chromHMM_state1_TssA HUES48_Cell_Line human	HUES48_Cell_Line	NA	human	ESC	PrimaryCulture	1_TssA_E014.bed	1	16795
hyper	83	chromHMM_state1_TssA	0	0.40371	4152	1	35	18	35	18	113006	55597	610904	chromHMM_state1_TssA A549_EtOH_0.02pct_Lung_Carcinoma human	A549_EtOH_0.02pct_Lung_Carcinoma	NA	human	LUNG	CellLine	1_TssA_E114.bed	1	23969
hyper	1	chromHMM_state1_TssA	0	0.460211	3250	1	26	28	28	18.3	80431	56499	643479	chromHMM_state1_TssA H1_Cell_Line human	H1_Cell_Line	NA	human	ESC	PrimaryCulture	1_TssA_E003.bed	1	15647
hyper	55	chromHMM_state1_TssA	0	0.403678	3840	1	36	20	36	19	105258	55909	618652	chromHMM_state1_TssA Esophagus human	Esophagus	NA	human	GI_ESOPHAGUS	PrimaryTissue	1_TssA_E079.bed	1	19382
hyper	97	chromHMM_state1_TssA	0	0.407604	3657	1	33	23	33	19	99822	56092	624088	chromHMM_state1_TssA NHLF_Lung_Fibroblasts human	NHLF_Lung_Fibroblasts	NA	human	LUNG	PrimaryCulture	1_TssA_E128.bed	1	20741
hyper	12	chromHMM_state1_TssA	0	0.465184	3007	1	25	33	33	19.7	74035	56742	649875	chromHMM_state1_TssA HUES64_Cell_Line human	HUES64_Cell_Line	NA	human	ESC	PrimaryCulture	1_TssA_E016.bed	1	14701
hyper	57	chromHMM_state1_TssA	0	0.407005	3553	1	34	26	34	20.3	97333	56196	626577	chromHMM_state1_TssA Fetal_Intestine_Large human	Fetal_Intestine_Large	NA	human	GI_INTESTINE	PrimaryTissue	1_TssA_E084.bed	1	18796
hyper	52	chromHMM_state1_TssA	0	0.419233	3230	1	32	29	32	20.7	86843	56519	637067	chromHMM_state1_TssA Colonic_Mucosa human	Colonic_Mucosa	NA	human	GI_COLON	PrimaryTissue	1_TssA_E075.bed	1	24067
hyper	58	chromHMM_state1_TssA	0	0.392795	3481	1	42	27	42	23.3	98500	56268	625410	chromHMM_state1_TssA Fetal_Intestine_Small human	Fetal_Intestine_Small	NA	human	GI_INTESTINE	PrimaryTissue	1_TssA_E085.bed	1	18614
hyper	17	chromHMM_state1_TssA	0	0.443138	2737	1	30	42	42	24.3	70759	57012	653151	chromHMM_state1_TssA iPS_DF_19.11_Cell_Line human	iPS_DF_19.11_Cell_Line	NA	human	IPSC	PrimaryCulture	1_TssA_E022.bed	1	15794
hyper	18	chromHMM_state1_TssA	0	0.403557	2965	1	37	35	37	24.3	82934	56784	640976	chromHMM_state1_TssA Bone_Marrow_Derived_Mesenchymal_Stem_Cell_Cultured_Cells hu	Bone_Marrow_Derived_Mesenchymal_Stem_Cell_Cultured_Cells	NA	human	STROMAL_CONNECTIVE	PrimaryCulture	1_TssA_E026.bed	1	18963
hyper	15	chromHMM_state1_TssA	0	0.484442	2327	1	21	52	52	24.7	55882	57422	668028	chromHMM_state1_TssA iPS-20b_Cell_Line human	iPS-20b_Cell_Line	NA	human	IPSC	PrimaryCulture	1_TssA_E020.bed	1	15284
hyper	37	chromHMM_state1_TssA	0	0.393417	2999	1	41	34	41	25.3	85724	56750	638186	chromHMM_state1_TssA Penis_Foreskin_Fibroblast_Primary_Cells_skin02 human	Penis_Foreskin_Fibroblast_Primary_Cells_skin02	NA	human	SKIN	PrimaryCulture	1_TssA_E056.bed	1	25560
hyper	73	chromHMM_state1_TssA	0	0.389146	3062	1	44	31	44	25.3	88235	56687	635675	chromHMM_state1_TssA Rectal_Mucosa.Donor_31 human	Rectal_Mucosa.Donor_31	NA	human	GI_RECTUM	PrimaryTissue	1_TssA_E102.bed	1	21892
hyper	6	chromHMM_state1_TssA	0	0.560251	1641	1	11	67	67	26.3	34739	58108	689171	chromHMM_state1_TssA H9_Cell_Line human	H9_Cell_Line	NA	human	ESC	PrimaryCulture	1_TssA_E008.bed	1	9546
hyper	63	chromHMM_state1_TssA	0	0.370826	3160	1	48	30	48	26.3	94743	56589	629167	chromHMM_state1_TssA Fetal_Stomach human	Fetal_Stomach	NA	human	GI_STOMACH	PrimaryTissue	1_TssA_E092.bed	1	17157
hyper	90	chromHMM_state1_TssA	0	0.400525	2828	1	39	40	40	26.7	79887	56921	644023	chromHMM_state1_TssA HSMMtube_Skeletal_Muscle_Myotubes_Derived_from_HSMM human	HSMMtube_Skeletal_Muscle_Myotubes_Derived_from_HSMM	NA	human	MUSCLE	PrimaryCulture	1_TssA_E121.bed	1	17754
hyper	5	chromHMM_state1_TssA	0	0.505942	1892	1	18	63	63	27.3	43949	57857	679961	chromHMM_state1_TssA H1_Derived_Neuronal_Progenitor_Cultured_Cells human	H1_Derived_Neuronal_Progenitor_Cultured_Cells	NA	human	ESC_DERIVED	ESCDerived	1_TssA_E007.bed	1	9212
hyper	16	chromHMM_state1_TssA	0	0.714589	742	1	1	81	81	27.7	12518	59007	711392	chromHMM_state1_TssA iPS_DF_6.9_Cell_Line human	iPS_DF_6.9_Cell_Line	NA	human	IPSC	PrimaryCulture	1_TssA_E021.bed	1	4580
hyper	80	chromHMM_state1_TssA	0	0.391106	2843	1	43	39	43	27.7	81997	56906	641913	chromHMM_state1_TssA Stomach_Smooth_Muscle human	Stomach_Smooth_Muscle	NA	human	GI_STOMACH	PrimaryTissue	1_TssA_E111.bed	1	25154
hyper	8	chromHMM_state1_TssA	0	0.444571	2166	1	29	56	56	28.7	56472	57583	667438	chromHMM_state1_TssA hESC_Derived_CD56+_Ectoderm_Cultured_Cells human	hESC_Derived_CD56+_Ectoderm_Cultured_Cells	NA	human	ESC_DERIVED	ESCDerived	1_TssA_E012.bed	1	10124
hyper	67	chromHMM_state1_TssA	0	0.339559	3013	1	53	32	53	28.7	97904	56736	626006	chromHMM_state1_TssA Lung human	Lung	NA	human	LUNG	PrimaryTissue	1_TssA_E096.bed	1	18565
hyper	7	chromHMM_state1_TssA	0	0.443087	2208	1	31	55	55	29	57696	57541	666214	chromHMM_state1_TssA hESC_Derived_CD184+_Endoderm_Cultured_Cells human	hESC_Derived_CD184+_Endoderm_Cultured_Cells	NA	human	ESC_DERIVED	ESCDerived	1_TssA_E011.bed	1	12788
hyper	89	chromHMM_state1_TssA	0	0.364342	2867	1	49	37	49	29	87974	56882	635936	chromHMM_state1_TssA HSMM_Skeletal_Muscle_Myoblasts human	HSMM_Skeletal_Muscle_Myoblasts	NA	human	MUSCLE	PrimaryCulture	1_TssA_E120.bed	1	16414
hyper	36	chromHMM_state1_TssA	0	0.336073	2884	1	54	36	54	30.3	94920	56865	628990	chromHMM_state1_TssA Penis_Foreskin_Fibroblast_Primary_Cells_skin01 human	Penis_Foreskin_Fibroblast_Primary_Cells_skin01	NA	human	SKIN	PrimaryCulture	1_TssA_E055.bed	1	22941
hyper	87	chromHMM_state1_TssA	0	0.346933	2787	1	51	41	51	31	89473	56962	634437	chromHMM_state1_TssA HepG2_Hepatocellular_Carcinoma human	HepG2_Hepatocellular_Carcinoma	NA	human	LIVER	CellLine	1_TssA_E118.bed	1	15527
hyper	11	chromHMM_state1_TssA	0	0.40062	2097	1	38	57	57	32	60255	57652	663655	chromHMM_state1_TssA HUES6_Cell_Line human	HUES6_Cell_Line	NA	human	ESC	PrimaryCulture	1_TssA_E015.bed	1	14676
hyper	13	chromHMM_state1_TssA	0	0.32335	2861	1	57	38	57	32	97437	56888	626473	chromHMM_state1_TssA IMR90_Cell_Line human	IMR90_Cell_Line	NA	human	LUNG	CellLine	1_TssA_E017.bed	1	17812
hyper	98	chromHMM_state1_TssA	0	0.349515	2661	1	50	46	50	32.3	85182	57088	638728	chromHMM_state1_TssA Osteoblasts human	Osteoblasts	NA	human	BONE	PrimaryCulture	1_TssA_E129.bed	1	18558
hyper	38	chromHMM_state1_TssA	0	0.324038	2735	1	56	44	56	33.7	93348	57014	630562	chromHMM_state1_TssA Penis_Foreskin_Keratinocyte_Primary_Cells_skin03 human	Penis_Foreskin_Keratinocyte_Primary_Cells_skin03	NA	human	SKIN	PrimaryCulture	1_TssA_E058.bed	1	19334
hyper	65	chromHMM_state1_TssA	0	0.340397	2495	1	52	48	52	33.7	82157	57254	641753	chromHMM_state1_TssA Gastric human	Gastric	NA	human	GI_STOMACH	PrimaryTissue	1_TssA_E094.bed	1	14737
hyper	78	chromHMM_state1_TssA	0	0.37243	2281	1	47	53	53	33.7	69720	57468	654190	chromHMM_state1_TssA Skeletal_Muscle_Female human	Skeletal_Muscle_Female	NA	human	MUSCLE	PrimaryTissue	1_TssA_E108.bed	1	24169
hyper	77	chromHMM_state1_TssA	0	0.298931	2737	1	62	42	62	35	100170	57012	623740	chromHMM_state1_TssA Sigmoid_Colon human	Sigmoid_Colon	NA	human	GI_COLON	PrimaryTissue	1_TssA_E106.bed	1	16015
hyper	39	chromHMM_state1_TssA	0	0.33393	2378	1	55	50	55	35.3	79934	57371	643976	chromHMM_state1_TssA Penis_Foreskin_Melanocyte_Primary_Cells_skin01 human	Penis_Foreskin_Melanocyte_Primary_Cells_skin01	NA	human	SKIN	PrimaryCulture	1_TssA_E059.bed	1	18922
hyper	79	chromHMM_state1_TssA	0	0.302369	2729	1	60	45	60	35.3	98925	57020	624985	chromHMM_state1_TssA Small_Intestine human	Small_Intestine	NA	human	GI_INTESTINE	PrimaryTissue	1_TssA_E109.bed	1	14866
hyper	4	chromHMM_state1_TssA	0	0.398016	1696	1	40	66	66	35.7	49502	58053	674408	chromHMM_state1_TssA H1_Derived_Mesenchymal_Stem_Cells human	H1_Derived_Mesenchymal_Stem_Cells	NA	human	ESC_DERIVED	ESCDerived	1_TssA_E006.bed	1	11063
hyper	86	chromHMM_state1_TssA	0	0.283222	2537	1	66	47	66	38	97998	57212	625912	chromHMM_state1_TssA HeLa-S3_Cervical_Carcinoma human	HeLa-S3_Cervical_Carcinoma	NA	human	CERVIX	CellLine	1_TssA_E117.bed	1	17873
hyper	94	chromHMM_state1_TssA	0	0.301328	2238	1	61	54	61	38.7	82795	57511	641115	chromHMM_state1_TssA NH-A_Astrocytes human	NH-A_Astrocytes	NA	human	BRAIN	PrimaryCulture	1_TssA_E125.bed	1	17229
hyper	40	chromHMM_state1_TssA	0	0.281468	2436	1	67	49	67	39	94973	57313	628937	chromHMM_state1_TssA Penis_Foreskin_Melanocyte_Primary_Cells_skin03 human	Penis_Foreskin_Melanocyte_Primary_Cells_skin03	NA	human	SKIN	PrimaryCulture	1_TssA_E061.bed	1	18664
hyper	96	chromHMM_state1_TssA	0	0.288707	2367	1	65	51	65	39	90500	57382	633410	chromHMM_state1_TssA NHEK-Epidermal_Keratinocytes human	NHEK-Epidermal_Keratinocytes	NA	human	SKIN	PrimaryCulture	1_TssA_E127.bed	1	17387
hyper	14	chromHMM_state1_TssA	0	0.382673	1450	1	46	71	71	39.3	44179	58299	679731	chromHMM_state1_TssA iPS-18_Cell_Line human	iPS-18_Cell_Line	NA	human	IPSC	PrimaryCulture	1_TssA_E019.bed	1	10965
hyper	34	chromHMM_state1_TssA	0	0.310074	2094	1	59	58	59	39.3	75902	57655	648008	chromHMM_state1_TssA Chondrocytes_from_Bone_Marrow_Derived_Mesenchymal_Stem_Cell	Chondrocytes_from_Bone_Marrow_Derived_Mesenchymal_Stem_Cell_Cultured_Cells	NA	human	STROMAL_CONNECTIVE	PrimaryCulture	1_TssA_E049.bed	1	17167
hyper	3	chromHMM_state1_TssA	0	0.321112	1707	1	58	64	64	41	60738	58042	663172	chromHMM_state1_TssA H1_BMP4_Derived_Trophoblast_Cultured_Cells human	H1_BMP4_Derived_Trophoblast_Cultured_Cells	NA	human	ESC_DERIVED	ESCDerived	1_TssA_E005.bed	1	11804
hyper	70	chromHMM_state1_TssA	0	0.386019	1053	1	45	77	77	41	32149	58696	691761	chromHMM_state1_TssA Placenta_Amnion human	Placenta_Amnion	NA	human	PLACENTA	PrimaryTissue	1_TssA_E099.bed	1	9983
hyper	88	chromHMM_state1_TssA	0	0.289238	2065	1	64	59	64	41.3	79729	57684	644181	chromHMM_state1_TssA HMEC_Mammary_Epithelial human	HMEC_Mammary_Epithelial	NA	human	BREAST	PrimaryCulture	1_TssA_E119.bed	1	17396
hyper	69	chromHMM_state1_TssA	0	0.292906	1925	1	63	62	63	42	73880	57824	650030	chromHMM_state1_TssA Pancreas human	Pancreas	NA	human	PANCREAS	PrimaryTissue	1_TssA_E098.bed	1	14516
hyper	44	chromHMM_state1_TssA	0	0.276599	2008	1	69	60	69	43.3	80850	57741	643060	chromHMM_state1_TssA Adult_Liver human	Adult_Liver	NA	human	LIVER	PrimaryTissue	1_TssA_E066.bed	1	20263
hyper	92	chromHMM_state1_TssA	0	0.245759	1978	1	70	61	70	44	88521	57771	635389	chromHMM_state1_TssA K562_Leukemia human	K562_Leukemia	NA	human	BLOOD	PrimaryCulture	1_TssA_E123.bed	1	19854
hyper	60	chromHMM_state1_TssA	0	0.281175	1629	1	68	68	68	45.7	65620	58120	658290	chromHMM_state1_TssA Fetal_Muscle_Trunk human	Fetal_Muscle_Trunk	NA	human	MUSCLE	PrimaryTissue	1_TssA_E089.bed	1	15218
hyper	61	chromHMM_state1_TssA	0	0.237661	1705	1	72	65	72	46	79631	58044	644279	chromHMM_state1_TssA Fetal_Muscle_Leg human	Fetal_Muscle_Leg	NA	human	MUSCLE_LEG	PrimaryTissue	1_TssA_E090.bed	1	16862
hyper	56	chromHMM_state1_TssA	0	0.23635	1546	1	73	69	73	47.7	73137	58203	650773	chromHMM_state1_TssA Fetal_Adrenal_Gland human	Fetal_Adrenal_Gland	NA	human	ADRENAL	PrimaryTissue	1_TssA_E080.bed	1	14676
hyper	42	chromHMM_state1_TssA	0	0.245438	1379	1	71	72	72	48	63563	58370	660347	chromHMM_state1_TssA Adipose_Nuclei human	Adipose_Nuclei	NA	human	FAT	PrimaryTissue	1_TssA_E063.bed	1	17876
hyper	85	chromHMM_state1_TssA	0	0.175608	1464	1	77	70	77	49.3	90587	58285	633323	chromHMM_state1_TssA GM12878_Lymphoblastoid human	GM12878_Lymphoblastoid	NA	human	BLOOD	PrimaryCulture	1_TssA_E116.bed	1	24088
hyper	91	chromHMM_state1_TssA	0	0.209666	1374	1	75	73	75	49.7	73065	58375	650845	chromHMM_state1_TssA HUVEC_Umbilical_Vein_Endothelial_Cells human	HUVEC_Umbilical_Vein_Endothelial_Cells	NA	human	VASCULAR	PrimaryCulture	1_TssA_E122.bed	1	14970
hyper	62	chromHMM_state1_TssA	0	0.216707	1239	1	74	76	76	50.3	64441	58510	659469	chromHMM_state1_TssA Fetal_Placenta human	Fetal_Placenta	NA	human	PLACENTA	PrimaryTissue	1_TssA_E091.bed	1	15976
hyper	81	chromHMM_state1_TssA	0	0.156578	1293	1	79	74	79	51.3	89606	58456	634304	chromHMM_state1_TssA Thymus human	Thymus	NA	human	THYMUS	PrimaryTissue	1_TssA_E112.bed	1	17435
hyper	82	chromHMM_state1_TssA	0	0.168944	1263	1	78	75	78	51.3	82045	58486	641865	chromHMM_state1_TssA Spleen human	Spleen	NA	human	SPLEEN	PrimaryTissue	1_TssA_E113.bed	1	13499
hyper	30	chromHMM_state1_TssA	0	0.106988	847	1	81	78	81	53.3	85770	58902	638140	chromHMM_state1_TssA CD4+_CD25int_CD127+_Tmem_Primary_Cells human	CD4+_CD25int_CD127+_Tmem_Primary_Cells	NA	human	BLOOD	PrimaryCell	1_TssA_E045.bed	1	20283
hyper	93	chromHMM_state1_TssA	0	0.126394	780	1	80	79	80	53.3	68581	58969	655329	chromHMM_state1_TssA Monocytes-CD14+_RO01746 human	Monocytes-CD14+_RO01746	NA	human	BLOOD	PrimaryCell	1_TssA_E124.bed	1	16138
hyper	22	chromHMM_state1_TssA	0	0.0884397	752	1	83	80	83	54.7	91191	58997	632719	chromHMM_state1_TssA CD4_Memory_Primary_Cells human	CD4_Memory_Primary_Cells	NA	human	BLOOD	PrimaryCell	1_TssA_E037.bed	1	16435
hyper	26	chromHMM_state1_TssA	0	0.0880301	697	1	84	82	84	55.7	85587	59052	638323	chromHMM_state1_TssA CD4+_CD25-_IL17-_PMA-Ionomycin_stimulated_MACS_purified_Th_	CD4+_CD25-_IL17-_PMA-Ionomycin_stimulated_MACS_purified_Th_Primary_Cells	NA	human	BLOOD	PrimaryCell	1_TssA_E041.bed	1	17912
hyper	19	chromHMM_state1_TssA	0	0.101033	534	1	82	87	87	56.7	59320	59215	664590	chromHMM_state1_TssA CD14_Primary_Cells human	CD14_Primary_Cells	NA	human	BLOOD	PrimaryCell	1_TssA_E029.bed	1	11794
hyper	33	chromHMM_state1_TssA	0	0.084728	635	1	86	83	86	56.7	81452	59114	642458	chromHMM_state1_TssA CD8_Memory_Primary_Cells human	CD8_Memory_Primary_Cells	NA	human	BLOOD	PrimaryCell	1_TssA_E048.bed	1	16505
hyper	41	chromHMM_state1_TssA	0	0.191368	265	1	76	94	94	57	16469	59484	707441	chromHMM_state1_TssA Peripheral_Blood_Mononuclear_Primary_Cells human	Peripheral_Blood_Mononuclear_Primary_Cells	NA	human	BLOOD	PrimaryCell	1_TssA_E062.bed	1	9598
hyper	24	chromHMM_state1_TssA	0	0.0791776	604	1	87	84	87	57.3	82702	59145	641208	chromHMM_state1_TssA CD4+_CD25-_CD45RA+_Naive_Primary_Cells human	CD4+_CD25-_CD45RA+_Naive_Primary_Cells	NA	human	BLOOD	PrimaryCell	1_TssA_E039.bed	1	17512
hyper	23	chromHMM_state1_TssA	0	0.076545	602	1	89	85	89	58.3	84960	59147	638950	chromHMM_state1_TssA CD4_Naive_Primary_Cells human	CD4_Naive_Primary_Cells	NA	human	BLOOD	PrimaryCell	1_TssA_E038.bed	1	15825
hyper	27	chromHMM_state1_TssA	0	0.0781663	557	1	88	86	88	58.3	77784	59192	646126	chromHMM_state1_TssA CD4+_CD25-_IL17+_PMA-Ionomcyin_stimulated_Th17_Primary_Cell	CD4+_CD25-_IL17+_PMA-Ionomcyin_stimulated_Th17_Primary_Cells	NA	human	BLOOD	PrimaryCell	1_TssA_E042.bed	1	16541
hyper	64	chromHMM_state1_TssA	0	0.0872368	486	1	85	89	89	58.3	62204	59263	661706	chromHMM_state1_TssA Fetal_Thymus human	Fetal_Thymus	NA	human	THYMUS	PrimaryTissue	1_TssA_E093.bed	1	13654
hyper	32	chromHMM_state1_TssA	0	0.0652607	489	1	91	88	91	60	81259	59260	642651	chromHMM_state1_TssA CD8_Naive_Primary_Cells human	CD8_Naive_Primary_Cells	NA	human	BLOOD	PrimaryCell	1_TssA_E047.bed	1	15293
hyper	29	chromHMM_state1_TssA	0	0.0688859	437	1	90	90	90	60.3	69946	59312	653964	chromHMM_state1_TssA CD4+_CD25+_CD127-_Treg_Primary_Cells human	CD4+_CD25+_CD127-_Treg_Primary_Cells	NA	human	BLOOD	PrimaryCell	1_TssA_E044.bed	1	17470
hyper	84	chromHMM_state1_TssA	0	0.0638181	388	1	92	91	92	61.3	67255	59361	656655	chromHMM_state1_TssA Dnd41_TCell_Leukemia human	Dnd41_TCell_Leukemia	NA	human	BLOOD	CellLine	1_TssA_E115.bed	1	11161
hyper	25	chromHMM_state1_TssA	0	0.0563599	367	1	93	92	93	62	71538	59382	652372	chromHMM_state1_TssA CD4+_CD25-_CD45RO+_Memory_Primary_Cells human	CD4+_CD25-_CD45RO+_Memory_Primary_Cells	NA	human	BLOOD	PrimaryCell	1_TssA_E040.bed	1	15137
hyper	20	chromHMM_state1_TssA	0	0.0539974	302	1	94	93	94	62.7	62250	59447	661660	chromHMM_state1_TssA CD19_Primary_Cells_Peripheral_UW human	CD19_Primary_Cells_Peripheral_UW	NA	human	BLOOD	PrimaryCell	1_TssA_E032.bed	1	12180
hyper	31	chromHMM_state1_TssA	0	0.0464501	253	1	96	95	96	64	60714	59496	663196	chromHMM_state1_TssA CD56_Primary_Cells human	CD56_Primary_Cells	NA	human	BLOOD	PrimaryCell	1_TssA_E046.bed	1	15373
hyper	35	chromHMM_state1_TssA	0	0.0489818	233	1	95	96	96	64	53577	59516	670333	chromHMM_state1_TssA Mobilized_CD34_Primary_Cells_Female human	Mobilized_CD34_Primary_Cells_Female	NA	human	BLOOD	PrimaryCell	1_TssA_E050.bed	1	12034
hyper	21	chromHMM_state1_TssA	0	0.0400587	198	1	97	97	97	65	55462	59551	668448	chromHMM_state1_TssA CD3_Primary_Cells_Peripheral_UW human	CD3_Primary_Cells_Peripheral_UW	NA	human	BLOOD	PrimaryCell	1_TssA_E034.bed	1	15534
hyper	28	chromHMM_state1_TssA	0	0.0290941	136	1	98	98	98	65.7	52677	59613	671233	chromHMM_state1_TssA CD4+_CD25-_Th_Primary_Cells human	CD4+_CD25-_Th_Primary_Cells	NA	human	BLOOD	PrimaryCell	1_TssA_E043.bed	1	11613
hyper	75	chromHMM_state2_TssFlnk	Inf	1.79566	6623	1	1	4	4	2	46994	53126	676916	chromHMM_state2_TssFlnk Right_Atrium human	Right_Atrium	NA	human	HEART	PrimaryTissue	2_TssFlnk_E104.bed	0	30607
hyper	76	chromHMM_state2_TssFlnk	175.749	1.6686	4163	2	2	15	15	6.33	31096	55586	692814	chromHMM_state2_TssFlnk Right_Ventricle human	Right_Ventricle	NA	human	HEART	PrimaryTissue	2_TssFlnk_E105.bed	8.72687e-175	23397
hyper	46	chromHMM_state2_TssFlnk	147.936	1.55638	4615	3	3	10	10	5.33	36946	55134	686964	chromHMM_state2_TssFlnk Brain_Anterior_Caudate human	Brain_Anterior_Caudate	NA	human	BRAIN	PrimaryTissue	2_TssFlnk_E068.bed	3.78121e-147	27634
hyper	59	chromHMM_state2_TssFlnk	129.234	1.40765	6745	4	6	3	6	4.33	60017	53004	663893	chromHMM_state2_TssFlnk Pancreatic_Islets human	Pancreatic_Islets	NA	human	PANCREAS	PrimaryTissue	2_TssFlnk_E087.bed	1.42834e-128	33813
hyper	74	chromHMM_state2_TssFlnk	112.406	1.4122	5660	5	5	6	6	5.33	49940	54089	673970	chromHMM_state2_TssFlnk Rectal_Smooth_Muscle human	Rectal_Smooth_Muscle	NA	human	GI_RECTUM	PrimaryTissue	2_TssFlnk_E103.bed	7.70259e-112	28530
hyper	51	chromHMM_state2_TssFlnk	95.6677	1.46226	3908	6	4	18	18	9.33	33064	55841	690846	chromHMM_state2_TssFlnk Brain_Substantia_Nigra human	Brain_Substantia_Nigra	NA	human	BRAIN	PrimaryTissue	2_TssFlnk_E074.bed	3.51043e-95	21332
hyper	45	chromHMM_state2_TssFlnk	45.6071	1.25443	4995	7	10	8	10	8.33	49076	54754	674834	chromHMM_state2_TssFlnk Brain_Angular_Gyrus human	Brain_Angular_Gyrus	NA	human	BRAIN	PrimaryTissue	2_TssFlnk_E067.bed	3.45935e-45	26844
hyper	50	chromHMM_state2_TssFlnk	43.2273	1.27677	4030	8	8	17	17	11	38810	55719	685100	chromHMM_state2_TssFlnk Brain_Mid_Frontal_Lobe human	Brain_Mid_Frontal_Lobe	NA	human	BRAIN	PrimaryTissue	2_TssFlnk_E073.bed	7.25797e-43	26919
hyper	6	chromHMM_state2_TssFlnk	38.1281	1.15339	11465	9	15	1	15	8.33	123592	48284	600318	chromHMM_state2_TssFlnk H9_Cell_Line human	H9_Cell_Line	NA	human	ESC	PrimaryCulture	2_TssFlnk_E008.bed	8.10701e-38	28420
hyper	71	chromHMM_state2_TssFlnk	36.0927	1.25818	3752	10	9	21	21	13.3	36602	55997	687308	chromHMM_state2_TssFlnk Psoas_Muscle human	Psoas_Muscle	NA	human	MUSCLE	PrimaryTissue	2_TssFlnk_E100.bed	7.91604e-36	24401
hyper	72	chromHMM_state2_TssFlnk	29.1364	1.25069	3130	11	11	33	33	18.3	30643	56619	693267	chromHMM_state2_TssFlnk Rectal_Mucosa.Donor_29 human	Rectal_Mucosa.Donor_29	NA	human	GI_RECTUM	PrimaryTissue	2_TssFlnk_E101.bed	6.50707e-29	28388
hyper	48	chromHMM_state2_TssFlnk	24.4657	1.30554	1826	12	7	48	48	22.3	17068	57923	706842	chromHMM_state2_TssFlnk Brain_Hippocampus_Middle human	Brain_Hippocampus_Middle	NA	human	BRAIN	PrimaryTissue	2_TssFlnk_E071.bed	2.79481e-24	20016
hyper	37	chromHMM_state2_TssFlnk	16.0811	1.20135	2425	13	12	44	44	23	24624	57324	699286	chromHMM_state2_TssFlnk Penis_Foreskin_Fibroblast_Primary_Cells_skin02 human	Penis_Foreskin_Fibroblast_Primary_Cells_skin02	NA	human	SKIN	PrimaryCulture	2_TssFlnk_E056.bed	6.25426e-16	27714
hyper	47	chromHMM_state2_TssFlnk	15.8099	1.15828	3744	14	14	23	23	17	39501	56005	684409	chromHMM_state2_TssFlnk Brain_Cingulate_Gyrus human	Brain_Cingulate_Gyrus	NA	human	BRAIN	PrimaryTissue	2_TssFlnk_E069.bed	1.0844e-15	24282
hyper	53	chromHMM_state2_TssFlnk	15.6846	1.1703	3225	15	13	32	32	20	33652	56524	690258	chromHMM_state2_TssFlnk Colon_Smooth_Muscle human	Colon_Smooth_Muscle	NA	human	GI_COLON	PrimaryTissue	2_TssFlnk_E076.bed	1.35048e-15	20266
hyper	49	chromHMM_state2_TssFlnk	12.6766	1.12548	4575	16	16	11	16	14.3	49673	55174	674237	chromHMM_state2_TssFlnk Brain_Inferior_Temporal_Lobe human	Brain_Inferior_Temporal_Lobe	NA	human	BRAIN	PrimaryTissue	2_TssFlnk_E072.bed	1.28961e-12	28387
hyper	89	chromHMM_state2_TssFlnk	7.94094	1.09846	4255	17	17	14	17	16	47232	55494	676678	chromHMM_state2_TssFlnk HSMM_Skeletal_Muscle_Myoblasts human	HSMM_Skeletal_Muscle_Myoblasts	NA	human	MUSCLE	PrimaryCulture	2_TssFlnk_E120.bed	6.60452e-08	22708
hyper	73	chromHMM_state2_TssFlnk	1.49092	1.04156	2375	18	18	46	46	27.3	27671	57374	696239	chromHMM_state2_TssFlnk Rectal_Mucosa.Donor_31 human	Rectal_Mucosa.Donor_31	NA	human	GI_RECTUM	PrimaryTissue	2_TssFlnk_E102.bed	0.175808	17375
hyper	97	chromHMM_state2_TssFlnk	1.29616	1.03471	2671	19	19	39	39	25.7	31323	57078	692587	chromHMM_state2_TssFlnk NHLF_Lung_Fibroblasts human	NHLF_Lung_Fibroblasts	NA	human	LUNG	PrimaryCulture	2_TssFlnk_E128.bed	0.260803	21111
hyper	98	chromHMM_state2_TssFlnk	1.08251	1.02829	2869	20	20	37	37	25.7	33849	56880	690061	chromHMM_state2_TssFlnk Osteoblasts human	Osteoblasts	NA	human	BONE	PrimaryCulture	2_TssFlnk_E129.bed	0.405211	18433
hyper	52	chromHMM_state2_TssFlnk	0.810903	1.0217	2597	21	21	41	41	27.7	30825	57152	693085	chromHMM_state2_TssFlnk Colonic_Mucosa human	Colonic_Mucosa	NA	human	GI_COLON	PrimaryTissue	2_TssFlnk_E075.bed	0.72128	21102
hyper	83	chromHMM_state2_TssFlnk	0.392158	1.00539	2394	22	22	45	45	29.7	28856	57355	695054	chromHMM_state2_TssFlnk A549_EtOH_0.02pct_Lung_Carcinoma human	A549_EtOH_0.02pct_Lung_Carcinoma	NA	human	LUNG	CellLine	2_TssFlnk_E114.bed	1	21456
hyper	80	chromHMM_state2_TssFlnk	0.225175	0.995201	2674	23	24	38	38	28.3	32547	57075	691363	chromHMM_state2_TssFlnk Stomach_Smooth_Muscle human	Stomach_Smooth_Muscle	NA	human	GI_STOMACH	PrimaryTissue	2_TssFlnk_E111.bed	1	27946
hyper	94	chromHMM_state2_TssFlnk	0.206392	0.99343	2360	24	25	47	47	32	28775	57389	695135	chromHMM_state2_TssFlnk NH-A_Astrocytes human	NH-A_Astrocytes	NA	human	BRAIN	PrimaryCulture	2_TssFlnk_E125.bed	1	17454
hyper	9	chromHMM_state2_TssFlnk	0.203398	0.995292	5308	25	23	7	25	18.3	64588	54441	659322	chromHMM_state2_TssFlnk hESC_Derived_CD56+_Mesoderm_Cultured_Cells human	hESC_Derived_CD56+_Mesoderm_Cultured_Cells	NA	human	ESC_DERIVED	ESCDerived	2_TssFlnk_E013.bed	1	21985
hyper	36	chromHMM_state2_TssFlnk	0.179014	0.988135	1286	26	27	60	60	37.7	15764	58463	708146	chromHMM_state2_TssFlnk Penis_Foreskin_Fibroblast_Primary_Cells_skin01 human	Penis_Foreskin_Fibroblast_Primary_Cells_skin01	NA	human	SKIN	PrimaryCulture	2_TssFlnk_E055.bed	1	20991
hyper	43	chromHMM_state2_TssFlnk	0.124273	0.988809	4129	27	26	16	27	23	50553	55620	673357	chromHMM_state2_TssFlnk Aorta human	Aorta	NA	human	VASCULAR	PrimaryTissue	2_TssFlnk_E065.bed	1	24933
hyper	17	chromHMM_state2_TssFlnk	0.0508376	0.978169	3471	28	28	27	28	27.7	42937	56278	680973	chromHMM_state2_TssFlnk iPS_DF_19.11_Cell_Line human	iPS_DF_19.11_Cell_Line	NA	human	IPSC	PrimaryCulture	2_TssFlnk_E022.bed	1	24147
hyper	86	chromHMM_state2_TssFlnk	0.0285316	0.95857	1401	29	29	56	56	38	17690	58348	706220	chromHMM_state2_TssFlnk HeLa-S3_Cervical_Carcinoma human	HeLa-S3_Cervical_Carcinoma	NA	human	CERVIX	CellLine	2_TssFlnk_E117.bed	1	14611
hyper	55	chromHMM_state2_TssFlnk	0.00368094	0.940602	1647	30	30	51	51	37	21178	58102	702732	chromHMM_state2_TssFlnk Esophagus human	Esophagus	NA	human	GI_ESOPHAGUS	PrimaryTissue	2_TssFlnk_E079.bed	1	13541
hyper	66	chromHMM_state2_TssFlnk	0.000176935	0.921431	1808	31	32	49	49	37.3	23712	57941	700198	chromHMM_state2_TssFlnk Left_Ventricle human	Left_Ventricle	NA	human	HEART	PrimaryTissue	2_TssFlnk_E095.bed	1	15710
hyper	10	chromHMM_state2_TssFlnk	0.000119469	0.93932	3416	32	31	30	32	31	43899	56333	680011	chromHMM_state2_TssFlnk HUES48_Cell_Line human	HUES48_Cell_Line	NA	human	ESC	PrimaryCulture	2_TssFlnk_E014.bed	1	24065
hyper	65	chromHMM_state2_TssFlnk	1.43807e-08	0.900056	2885	33	34	36	36	34.3	38628	56864	685282	chromHMM_state2_TssFlnk Gastric human	Gastric	NA	human	GI_STOMACH	PrimaryTissue	2_TssFlnk_E094.bed	1	19989
hyper	82	chromHMM_state2_TssFlnk	7.4421e-11	0.761597	524	34	49	86	86	56.3	8313	59225	715597	chromHMM_state2_TssFlnk Spleen human	Spleen	NA	human	SPLEEN	PrimaryTissue	2_TssFlnk_E113.bed	1	10508
hyper	34	chromHMM_state2_TssFlnk	3.95509e-11	0.877477	2573	35	35	42	42	37.3	35314	57176	688596	chromHMM_state2_TssFlnk Chondrocytes_from_Bone_Marrow_Derived_Mesenchymal_Stem_C	Chondrocytes_from_Bone_Marrow_Derived_Mesenchymal_Stem_Cell_Cultured_Cells	NA	human	STROMAL_CONNECTIVE	PrimaryCulture	2_TssFlnk_E049.bed	1	18186
hyper	5	chromHMM_state2_TssFlnk	9.46295e-13	0.910714	6469	36	33	5	36	24.7	85160	53280	638750	chromHMM_state2_TssFlnk H1_Derived_Neuronal_Progenitor_Cultured_Cells human	H1_Derived_Neuronal_Progenitor_Cultured_Cells	NA	human	ESC_DERIVED	ESCDerived	2_TssFlnk_E007.bed	1	25978
hyper	18	chromHMM_state2_TssFlnk	1.44649e-16	0.867103	3526	37	36	25	37	32.7	48825	56223	675085	chromHMM_state2_TssFlnk Bone_Marrow_Derived_Mesenchymal_Stem_Cell_Cultured_Cells	Bone_Marrow_Derived_Mesenchymal_Stem_Cell_Cultured_Cells	NA	human	STROMAL_CONNECTIVE	PrimaryCulture	2_TssFlnk_E026.bed	1	22412
hyper	16	chromHMM_state2_TssFlnk	0	0.832142	8988	38	39	2	39	26.3	127010	50761	596900	chromHMM_state2_TssFlnk iPS_DF_6.9_Cell_Line human	iPS_DF_6.9_Cell_Line	NA	human	IPSC	PrimaryCulture	2_TssFlnk_E021.bed	1	22700
hyper	2	chromHMM_state2_TssFlnk	0	0.860785	3749	38	37	22	38	32.3	52240	56000	671670	chromHMM_state2_TssFlnk H1_BMP4_Derived_Mesendoderm_Cultured_Cells human	H1_BMP4_Derived_Mesendoderm_Cultured_Cells	NA	human	ESC_DERIVED	ESCDerived	2_TssFlnk_E004.bed	1	22604
hyper	7	chromHMM_state2_TssFlnk	0	0.748992	4902	38	51	9	51	32.7	77174	54847	646736	chromHMM_state2_TssFlnk hESC_Derived_CD184+_Endoderm_Cultured_Cells human	hESC_Derived_CD184+_Endoderm_Cultured_Cells	NA	human	ESC_DERIVED	ESCDerived	2_TssFlnk_E011.bed	1	34820
hyper	54	chromHMM_state2_TssFlnk	0	0.858161	3604	38	38	24	38	33.3	50382	56145	673528	chromHMM_state2_TssFlnk Duodenum_Smooth_Muscle human	Duodenum_Smooth_Muscle	NA	human	GI_DUODENUM	PrimaryTissue	2_TssFlnk_E078.bed	1	24894
hyper	68	chromHMM_state2_TssFlnk	0	0.778733	3894	38	46	19	46	34.3	59483	55855	664427	chromHMM_state2_TssFlnk Ovary human	Ovary	NA	human	OVARY	PrimaryTissue	2_TssFlnk_E097.bed	1	28452
hyper	15	chromHMM_state2_TssFlnk	0	0.681639	4290	38	57	13	57	36	73779	55459	650131	chromHMM_state2_TssFlnk iPS-20b_Cell_Line human	iPS-20b_Cell_Line	NA	human	IPSC	PrimaryCulture	2_TssFlnk_E020.bed	1	32210
hyper	95	chromHMM_state2_TssFlnk	0	0.830799	3331	38	40	31	40	36.3	48033	56418	675877	chromHMM_state2_TssFlnk NHDF-Ad_Adult_Dermal_Fibroblasts human	NHDF-Ad_Adult_Dermal_Fibroblasts	NA	human	SKIN	PrimaryCulture	2_TssFlnk_E126.bed	1	24058
hyper	14	chromHMM_state2_TssFlnk	0	0.670441	4498	38	61	12	61	37	78385	55251	645525	chromHMM_state2_TssFlnk iPS-18_Cell_Line human	iPS-18_Cell_Line	NA	human	IPSC	PrimaryCulture	2_TssFlnk_E019.bed	1	25307
hyper	90	chromHMM_state2_TssFlnk	0	0.782522	3434	38	45	28	45	37	52333	56315	671577	chromHMM_state2_TssFlnk HSMMtube_Skeletal_Muscle_Myotubes_Derived_from_HSMM huma	HSMMtube_Skeletal_Muscle_Myotubes_Derived_from_HSMM	NA	human	MUSCLE	PrimaryCulture	2_TssFlnk_E121.bed	1	22642
hyper	39	chromHMM_state2_TssFlnk	0	0.809077	2988	38	41	35	41	38	44224	56761	679686	chromHMM_state2_TssFlnk Penis_Foreskin_Melanocyte_Primary_Cells_skin01 human	Penis_Foreskin_Melanocyte_Primary_Cells_skin01	NA	human	SKIN	PrimaryCulture	2_TssFlnk_E059.bed	1	27271
hyper	12	chromHMM_state2_TssFlnk	0	0.759905	3429	38	50	29	50	39	53698	56320	670212	chromHMM_state2_TssFlnk HUES64_Cell_Line human	HUES64_Cell_Line	NA	human	ESC	PrimaryCulture	2_TssFlnk_E016.bed	1	25782
hyper	11	chromHMM_state2_TssFlnk	0	0.673435	3840	38	60	20	60	39.3	66998	55909	656912	chromHMM_state2_TssFlnk HUES6_Cell_Line human	HUES6_Cell_Line	NA	human	ESC	PrimaryCulture	2_TssFlnk_E015.bed	1	29279
hyper	69	chromHMM_state2_TssFlnk	0	0.71163	2657	38	54	40	54	44	44436	57092	679474	chromHMM_state2_TssFlnk Pancreas human	Pancreas	NA	human	PANCREAS	PrimaryTissue	2_TssFlnk_E098.bed	1	21112
hyper	1	chromHMM_state2_TssFlnk	0	0.741364	2538	38	52	43	52	44.3	40872	57211	683038	chromHMM_state2_TssFlnk H1_Cell_Line human	H1_Cell_Line	NA	human	ESC	PrimaryCulture	2_TssFlnk_E003.bed	1	22600
hyper	78	chromHMM_state2_TssFlnk	0	0.79489	1537	38	42	53	53	44.3	23272	58212	700638	chromHMM_state2_TssFlnk Skeletal_Muscle_Female human	Skeletal_Muscle_Female	NA	human	MUSCLE	PrimaryTissue	2_TssFlnk_E108.bed	1	15535
hyper	30	chromHMM_state2_TssFlnk	0	0.762612	1500	38	48	54	54	46.7	23647	58249	700263	chromHMM_state2_TssFlnk CD4+_CD25int_CD127+_Tmem_Primary_Cells human	CD4+_CD25int_CD127+_Tmem_Primary_Cells	NA	human	BLOOD	PrimaryCell	2_TssFlnk_E045.bed	1	14440
hyper	8	chromHMM_state2_TssFlnk	0	0.576747	3043	38	69	34	69	47	61622	56706	662288	chromHMM_state2_TssFlnk hESC_Derived_CD56+_Ectoderm_Cultured_Cells human	hESC_Derived_CD56+_Ectoderm_Cultured_Cells	NA	human	ESC_DERIVED	ESCDerived	2_TssFlnk_E012.bed	1	20155
hyper	96	chromHMM_state2_TssFlnk	0	0.784508	1288	38	44	59	59	47	19774	58461	704136	chromHMM_state2_TssFlnk NHEK-Epidermal_Keratinocytes human	NHEK-Epidermal_Keratinocytes	NA	human	SKIN	PrimaryCulture	2_TssFlnk_E127.bed	1	11786
hyper	24	chromHMM_state2_TssFlnk	0	0.790208	1280	38	43	61	61	47.3	19514	58469	704396	chromHMM_state2_TssFlnk CD4+_CD25-_CD45RA+_Naive_Primary_Cells human	CD4+_CD25-_CD45RA+_Naive_Primary_Cells	NA	human	BLOOD	PrimaryCell	2_TssFlnk_E039.bed	1	9520
hyper	38	chromHMM_state2_TssFlnk	0	0.771789	1341	38	47	57	57	47.3	20912	58408	702998	chromHMM_state2_TssFlnk Penis_Foreskin_Keratinocyte_Primary_Cells_skin03 human	Penis_Foreskin_Keratinocyte_Primary_Cells_skin03	NA	human	SKIN	PrimaryCulture	2_TssFlnk_E058.bed	1	18911
hyper	70	chromHMM_state2_TssFlnk	0	0.505707	3488	38	78	26	78	47.3	79056	56261	644854	chromHMM_state2_TssFlnk Placenta_Amnion human	Placenta_Amnion	NA	human	PLACENTA	PrimaryTissue	2_TssFlnk_E099.bed	1	20478
hyper	87	chromHMM_state2_TssFlnk	0	0.682671	1486	38	56	55	56	49.7	26072	58263	697838	chromHMM_state2_TssFlnk HepG2_Hepatocellular_Carcinoma human	HepG2_Hepatocellular_Carcinoma	NA	human	LIVER	CellLine	2_TssFlnk_E118.bed	1	16330
hyper	23	chromHMM_state2_TssFlnk	0	0.641329	1295	38	64	58	64	53.3	24172	58454	699738	chromHMM_state2_TssFlnk CD4_Naive_Primary_Cells human	CD4_Naive_Primary_Cells	NA	human	BLOOD	PrimaryCell	2_TssFlnk_E038.bed	1	13008
hyper	81	chromHMM_state2_TssFlnk	0	0.686308	919	38	55	70	70	54.3	16111	58830	707799	chromHMM_state2_TssFlnk Thymus human	Thymus	NA	human	THYMUS	PrimaryTissue	2_TssFlnk_E112.bed	1	14252
hyper	58	chromHMM_state2_TssFlnk	0	0.657857	1166	38	62	65	65	55	21259	58583	702651	chromHMM_state2_TssFlnk Fetal_Intestine_Small human	Fetal_Intestine_Small	NA	human	GI_INTESTINE	PrimaryTissue	2_TssFlnk_E085.bed	1	13197
hyper	92	chromHMM_state2_TssFlnk	0	0.600626	1245	38	67	62	67	55.7	24771	58504	699139	chromHMM_state2_TssFlnk K562_Leukemia human	K562_Leukemia	NA	human	BLOOD	PrimaryCulture	2_TssFlnk_E123.bed	1	17898
hyper	40	chromHMM_state2_TssFlnk	0	0.71539	743	38	53	78	78	56.3	12521	59006	711389	chromHMM_state2_TssFlnk Penis_Foreskin_Melanocyte_Primary_Cells_skin03 human	Penis_Foreskin_Melanocyte_Primary_Cells_skin03	NA	human	SKIN	PrimaryCulture	2_TssFlnk_E061.bed	1	12273
hyper	57	chromHMM_state2_TssFlnk	0	0.586952	1184	38	68	63	68	56.3	24104	58565	699806	chromHMM_state2_TssFlnk Fetal_Intestine_Large human	Fetal_Intestine_Large	NA	human	GI_INTESTINE	PrimaryTissue	2_TssFlnk_E084.bed	1	14238
hyper	13	chromHMM_state2_TssFlnk	0	0.674791	875	38	58	74	74	56.7	15601	58874	708309	chromHMM_state2_TssFlnk IMR90_Cell_Line human	IMR90_Cell_Line	NA	human	LUNG	CellLine	2_TssFlnk_E017.bed	1	14933
hyper	42	chromHMM_state2_TssFlnk	0	0.603342	1128	38	66	66	66	56.7	22374	58621	701536	chromHMM_state2_TssFlnk Adipose_Nuclei human	Adipose_Nuclei	NA	human	FAT	PrimaryTissue	2_TssFlnk_E063.bed	1	14220
hyper	67	chromHMM_state2_TssFlnk	0	0.673907	886	38	59	73	73	56.7	15816	58863	708094	chromHMM_state2_TssFlnk Lung human	Lung	NA	human	LUNG	PrimaryTissue	2_TssFlnk_E096.bed	1	12103
hyper	3	chromHMM_state2_TssFlnk	0	0.462514	1632	38	82	52	82	57.3	41436	58117	682474	chromHMM_state2_TssFlnk H1_BMP4_Derived_Trophoblast_Cultured_Cells human	H1_BMP4_Derived_Trophoblast_Cultured_Cells	NA	human	ESC_DERIVED	ESCDerived	2_TssFlnk_E005.bed	1	19406
hyper	4	chromHMM_state2_TssFlnk	0	0.372516	1712	38	85	50	85	57.7	53118	58037	670792	chromHMM_state2_TssFlnk H1_Derived_Mesenchymal_Stem_Cells human	H1_Derived_Mesenchymal_Stem_Cells	NA	human	ESC_DERIVED	ESCDerived	2_TssFlnk_E006.bed	1	19451
hyper	27	chromHMM_state2_TssFlnk	0	0.64315	793	38	63	76	76	59	14830	58956	709080	chromHMM_state2_TssFlnk CD4+_CD25-_IL17+_PMA-Ionomcyin_stimulated_Th17_Primary_C	CD4+_CD25-_IL17+_PMA-Ionomcyin_stimulated_Th17_Primary_Cells	NA	human	BLOOD	PrimaryCell	2_TssFlnk_E042.bed	1	8938
hyper	33	chromHMM_state2_TssFlnk	0	0.528905	1120	38	73	67	73	59.3	25235	58629	698675	chromHMM_state2_TssFlnk CD8_Memory_Primary_Cells human	CD8_Memory_Primary_Cells	NA	human	BLOOD	PrimaryCell	2_TssFlnk_E048.bed	1	12294
hyper	41	chromHMM_state2_TssFlnk	0	0.516107	1184	38	77	63	77	59.3	27288	58565	696622	chromHMM_state2_TssFlnk Peripheral_Blood_Mononuclear_Primary_Cells human	Peripheral_Blood_Mononuclear_Primary_Cells	NA	human	BLOOD	PrimaryCell	2_TssFlnk_E062.bed	1	14104
hyper	29	chromHMM_state2_TssFlnk	0	0.616198	737	38	65	79	79	60.7	14381	59012	709529	chromHMM_state2_TssFlnk CD4+_CD25+_CD127-_Treg_Primary_Cells human	CD4+_CD25+_CD127-_Treg_Primary_Cells	NA	human	BLOOD	PrimaryCell	2_TssFlnk_E044.bed	1	9473
hyper	91	chromHMM_state2_TssFlnk	0	0.52258	900	38	75	71	75	61.3	20583	58849	703327	chromHMM_state2_TssFlnk HUVEC_Umbilical_Vein_Endothelial_Cells human	HUVEC_Umbilical_Vein_Endothelial_Cells	NA	human	VASCULAR	PrimaryCulture	2_TssFlnk_E122.bed	1	10567
hyper	85	chromHMM_state2_TssFlnk	0	0.505251	1117	38	79	68	79	61.7	26304	58632	697606	chromHMM_state2_TssFlnk GM12878_Lymphoblastoid human	GM12878_Lymphoblastoid	NA	human	BLOOD	PrimaryCulture	2_TssFlnk_E116.bed	1	23834
hyper	88	chromHMM_state2_TssFlnk	0	0.518421	894	38	76	72	76	62	20607	58855	703303	chromHMM_state2_TssFlnk HMEC_Mammary_Epithelial human	HMEC_Mammary_Epithelial	NA	human	BREAST	PrimaryCulture	2_TssFlnk_E119.bed	1	13061
hyper	77	chromHMM_state2_TssFlnk	0	0.559796	618	38	71	81	81	63.3	13268	59131	710642	chromHMM_state2_TssFlnk Sigmoid_Colon human	Sigmoid_Colon	NA	human	GI_COLON	PrimaryTissue	2_TssFlnk_E106.bed	1	10618
hyper	79	chromHMM_state2_TssFlnk	0	0.575774	601	38	70	82	82	63.3	12554	59148	711356	chromHMM_state2_TssFlnk Small_Intestine human	Small_Intestine	NA	human	GI_INTESTINE	PrimaryTissue	2_TssFlnk_E109.bed	1	7911
hyper	60	chromHMM_state2_TssFlnk	0	0.405869	1078	38	84	69	84	63.7	31352	58671	692558	chromHMM_state2_TssFlnk Fetal_Muscle_Trunk human	Fetal_Muscle_Trunk	NA	human	MUSCLE	PrimaryTissue	2_TssFlnk_E089.bed	1	17191
hyper	22	chromHMM_state2_TssFlnk	0	0.525844	580	38	74	84	84	65.3	13248	59169	710662	chromHMM_state2_TssFlnk CD4_Memory_Primary_Cells human	CD4_Memory_Primary_Cells	NA	human	BLOOD	PrimaryCell	2_TssFlnk_E037.bed	1	6792
hyper	32	chromHMM_state2_TssFlnk	0	0.470719	779	38	81	77	81	65.3	19761	58970	704149	chromHMM_state2_TssFlnk CD8_Naive_Primary_Cells human	CD8_Naive_Primary_Cells	NA	human	BLOOD	PrimaryCell	2_TssFlnk_E047.bed	1	9603
hyper	44	chromHMM_state2_TssFlnk	0	0.534847	491	38	72	88	88	66	11044	59258	712866	chromHMM_state2_TssFlnk Adult_Liver human	Adult_Liver	NA	human	LIVER	PrimaryTissue	2_TssFlnk_E066.bed	1	9125
hyper	62	chromHMM_state2_TssFlnk	0	0.370588	795	38	86	75	86	66.3	25417	58954	698493	chromHMM_state2_TssFlnk Fetal_Placenta human	Fetal_Placenta	NA	human	PLACENTA	PrimaryTissue	2_TssFlnk_E091.bed	1	13637
hyper	28	chromHMM_state2_TssFlnk	0	0.365792	737	38	88	79	88	68.3	23900	59012	700010	chromHMM_state2_TssFlnk CD4+_CD25-_Th_Primary_Cells human	CD4+_CD25-_Th_Primary_Cells	NA	human	BLOOD	PrimaryCell	2_TssFlnk_E043.bed	1	10459
hyper	63	chromHMM_state2_TssFlnk	0	0.461771	579	38	83	85	85	68.7	15022	59170	708888	chromHMM_state2_TssFlnk Fetal_Stomach human	Fetal_Stomach	NA	human	GI_STOMACH	PrimaryTissue	2_TssFlnk_E092.bed	1	11601
hyper	26	chromHMM_state2_TssFlnk	0	0.490158	468	38	80	89	89	69	11475	59281	712435	chromHMM_state2_TssFlnk CD4+_CD25-_IL17-_PMA-Ionomycin_stimulated_MACS_purified_	CD4+_CD25-_IL17-_PMA-Ionomycin_stimulated_MACS_purified_Th_Primary_Cells	NA	human	BLOOD	PrimaryCell	2_TssFlnk_E041.bed	1	7627
hyper	56	chromHMM_state2_TssFlnk	0	0.303168	583	38	89	83	89	70	22788	59166	701122	chromHMM_state2_TssFlnk Fetal_Adrenal_Gland human	Fetal_Adrenal_Gland	NA	human	ADRENAL	PrimaryTissue	2_TssFlnk_E080.bed	1	10665
hyper	61	chromHMM_state2_TssFlnk	0	0.36631	502	38	87	87	87	70.7	16366	59247	707544	chromHMM_state2_TssFlnk Fetal_Muscle_Leg human	Fetal_Muscle_Leg	NA	human	MUSCLE_LEG	PrimaryTissue	2_TssFlnk_E090.bed	1	10127
hyper	25	chromHMM_state2_TssFlnk	0	0.242988	335	38	92	91	92	73.7	16417	59414	707493	chromHMM_state2_TssFlnk CD4+_CD25-_CD45RO+_Memory_Primary_Cells human	CD4+_CD25-_CD45RO+_Memory_Primary_Cells	NA	human	BLOOD	PrimaryCell	2_TssFlnk_E040.bed	1	8318
hyper	64	chromHMM_state2_TssFlnk	0	0.216227	375	38	93	90	93	73.7	20545	59374	703365	chromHMM_state2_TssFlnk Fetal_Thymus human	Fetal_Thymus	NA	human	THYMUS	PrimaryTissue	2_TssFlnk_E093.bed	1	10136
hyper	93	chromHMM_state2_TssFlnk	0	0.289678	255	38	90	93	93	73.7	10555	59494	713355	chromHMM_state2_TssFlnk Monocytes-CD14+_RO01746 human	Monocytes-CD14+_RO01746	NA	human	BLOOD	PrimaryCell	2_TssFlnk_E124.bed	1	8053
hyper	35	chromHMM_state2_TssFlnk	0	0.245282	230	38	91	95	95	74.7	11228	59519	712682	chromHMM_state2_TssFlnk Mobilized_CD34_Primary_Cells_Female human	Mobilized_CD34_Primary_Cells_Female	NA	human	BLOOD	PrimaryCell	2_TssFlnk_E050.bed	1	5980
hyper	19	chromHMM_state2_TssFlnk	0	0.147923	259	38	96	92	96	75.3	20697	59490	703213	chromHMM_state2_TssFlnk CD14_Primary_Cells human	CD14_Primary_Cells	NA	human	BLOOD	PrimaryCell	2_TssFlnk_E029.bed	1	8374
hyper	31	chromHMM_state2_TssFlnk	0	0.2015	234	38	94	94	94	75.3	13855	59515	710055	chromHMM_state2_TssFlnk CD56_Primary_Cells human	CD56_Primary_Cells	NA	human	BLOOD	PrimaryCell	2_TssFlnk_E046.bed	1	7254
hyper	20	chromHMM_state2_TssFlnk	0	0.124061	212	38	97	96	97	77	20198	59537	703712	chromHMM_state2_TssFlnk CD19_Primary_Cells_Peripheral_UW human	CD19_Primary_Cells_Peripheral_UW	NA	human	BLOOD	PrimaryCell	2_TssFlnk_E032.bed	1	7910
hyper	84	chromHMM_state2_TssFlnk	0	0.158009	107	38	95	98	98	77	8127	59642	715783	chromHMM_state2_TssFlnk Dnd41_TCell_Leukemia human	Dnd41_TCell_Leukemia	NA	human	BLOOD	CellLine	2_TssFlnk_E115.bed	1	4344
hyper	21	chromHMM_state2_TssFlnk	0	0.116885	168	38	98	97	98	77.7	17052	59581	706858	chromHMM_state2_TssFlnk CD3_Primary_Cells_Peripheral_UW human	CD3_Primary_Cells_Peripheral_UW	NA	human	BLOOD	PrimaryCell	2_TssFlnk_E034.bed	1	8117
hyper	48	chromHMM_state3_TssFlnkU	214	1.7107	4683	1	19	4	19	8	34283	55066	689627	chromHMM_state3_TssFlnkU Brain_Hippocampus_Middle human	Brain_Hippocampus_Middle	NA	human	BRAIN	PrimaryTissue	3_TssFlnkU_E071.bed	9.78951e-213	33439
hyper	68	chromHMM_state3_TssFlnkU	205.712	2.98364	1247	2	1	77	77	26.7	5135	58502	718775	chromHMM_state3_TssFlnkU Ovary human	Ovary	NA	human	OVARY	PrimaryTissue	3_TssFlnkU_E097.bed	9.50522e-205	6585
hyper	46	chromHMM_state3_TssFlnkU	144.965	1.63571	3664	3	25	14	25	14	27802	56085	696108	chromHMM_state3_TssFlnkU Brain_Anterior_Caudate human	Brain_Anterior_Caudate	NA	human	BRAIN	PrimaryTissue	3_TssFlnkU_E068.bed	3.54046e-144	30531
hyper	75	chromHMM_state3_TssFlnkU	136.497	2.03977	1723	4	6	66	66	25.3	10387	58026	713523	chromHMM_state3_TssFlnkU Right_Atrium human	Right_Atrium	NA	human	HEART	PrimaryTissue	3_TssFlnkU_E104.bed	7.80245e-136	12341
hyper	66	chromHMM_state3_TssFlnkU	133.29	1.92673	1956	5	11	58	58	24.7	12497	57793	711413	chromHMM_state3_TssFlnkU Left_Ventricle human	Left_Ventricle	NA	human	HEART	PrimaryTissue	3_TssFlnkU_E095.bed	1.00459e-132	12840
hyper	1	chromHMM_state3_TssFlnkU	129.729	2.07926	1559	6	5	67	67	26	9209	58190	714701	chromHMM_state3_TssFlnkU H1_Cell_Line human	H1_Cell_Line	NA	human	ESC	PrimaryCulture	3_TssFlnkU_E003.bed	3.05111e-129	8794
hyper	76	chromHMM_state3_TssFlnkU	129.016	1.71172	2737	7	18	37	37	20.7	19749	57012	704161	chromHMM_state3_TssFlnkU Right_Ventricle human	Right_Ventricle	NA	human	HEART	PrimaryTissue	3_TssFlnkU_E105.bed	1.34856e-128	15911
hyper	13	chromHMM_state3_TssFlnkU	125.453	1.56485	3776	8	31	12	31	17	29918	55973	693992	chromHMM_state3_TssFlnkU IMR90_Cell_Line human	IMR90_Cell_Line	NA	human	LUNG	CellLine	3_TssFlnkU_E017.bed	4.31395e-125	20695
hyper	10	chromHMM_state3_TssFlnkU	122.869	1.95572	1726	9	9	65	65	27.7	10846	58023	713064	chromHMM_state3_TssFlnkU HUES48_Cell_Line human	HUES48_Cell_Line	NA	human	ESC	PrimaryCulture	3_TssFlnkU_E014.bed	1.47247e-122	15994
hyper	63	chromHMM_state3_TssFlnkU	121.104	1.64899	2937	10	23	31	31	21.3	22005	56812	701905	chromHMM_state3_TssFlnkU Fetal_Stomach human	Fetal_Stomach	NA	human	GI_STOMACH	PrimaryTissue	3_TssFlnkU_E092.bed	7.70912e-121	17317
hyper	58	chromHMM_state3_TssFlnkU	114.421	1.65278	2743	11	22	36	36	23	20479	57006	703431	chromHMM_state3_TssFlnkU Fetal_Intestine_Small human	Fetal_Intestine_Small	NA	human	GI_INTESTINE	PrimaryTissue	3_TssFlnkU_E085.bed	3.377e-114	18272
hyper	9	chromHMM_state3_TssFlnkU	102.451	2.50149	825	12	2	87	87	33.7	4029	58924	719881	chromHMM_state3_TssFlnkU hESC_Derived_CD56+_Mesoderm_Cultured_Cells human	hESC_Derived_CD56+_Mesoderm_Cultured_Cells	NA	human	ESC_DERIVED	ESCDerived	3_TssFlnkU_E013.bed	2.8888e-102	5163
hyper	61	chromHMM_state3_TssFlnkU	95.3021	1.44788	4102	13	35	8	35	18.7	35070	55647	688840	chromHMM_state3_TssFlnkU Fetal_Muscle_Leg human	Fetal_Muscle_Leg	NA	human	MUSCLE_LEG	PrimaryTissue	3_TssFlnkU_E090.bed	3.75955e-95	20935
hyper	57	chromHMM_state3_TssFlnkU	92.0889	1.61943	2364	14	28	43	43	28.3	17958	57385	705952	chromHMM_state3_TssFlnkU Fetal_Intestine_Large human	Fetal_Intestine_Large	NA	human	GI_INTESTINE	PrimaryTissue	3_TssFlnkU_E084.bed	5.70416e-92	17336
hyper	11	chromHMM_state3_TssFlnkU	91.5344	1.95942	1268	15	8	75	75	32.7	7923	58481	715987	chromHMM_state3_TssFlnkU HUES6_Cell_Line human	HUES6_Cell_Line	NA	human	ESC	PrimaryCulture	3_TssFlnkU_E015.bed	1.90874e-91	11065
hyper	12	chromHMM_state3_TssFlnkU	89.2096	2.01066	1154	16	7	80	80	34.3	7022	58595	716888	chromHMM_state3_TssFlnkU HUES64_Cell_Line human	HUES64_Cell_Line	NA	human	ESC	PrimaryCulture	3_TssFlnkU_E016.bed	3.78003e-89	10258
hyper	50	chromHMM_state3_TssFlnkU	87.4019	1.53662	2791	17	32	34	34	27.7	22371	56958	701539	chromHMM_state3_TssFlnkU Brain_Mid_Frontal_Lobe human	Brain_Mid_Frontal_Lobe	NA	human	BRAIN	PrimaryTissue	3_TssFlnkU_E073.bed	2.28514e-87	22037
hyper	47	chromHMM_state3_TssFlnkU	83.6408	1.49146	3064	18	34	28	34	26.7	25318	56685	698592	chromHMM_state3_TssFlnkU Brain_Cingulate_Gyrus human	Brain_Cingulate_Gyrus	NA	human	BRAIN	PrimaryTissue	3_TssFlnkU_E069.bed	1.24496e-83	25382
hyper	92	chromHMM_state3_TssFlnkU	78.5899	1.4388	3451	19	36	20	36	25	29581	56298	694329	chromHMM_state3_TssFlnkU K562_Leukemia human	K562_Leukemia	NA	human	BLOOD	PrimaryCulture	3_TssFlnkU_E123.bed	1.32617e-78	29792
hyper	36	chromHMM_state3_TssFlnkU	77.4959	1.35911	4791	20	48	3	48	23.7	43634	54958	680276	chromHMM_state3_TssFlnkU Penis_Foreskin_Fibroblast_Primary_Cells_skin01 human	Penis_Foreskin_Fibroblast_Primary_Cells_skin01	NA	human	SKIN	PrimaryCulture	3_TssFlnkU_E055.bed	1.56412e-77	33163
hyper	55	chromHMM_state3_TssFlnkU	77.2708	1.62975	1920	21	26	59	59	35.3	14453	57829	709457	chromHMM_state3_TssFlnkU Esophagus human	Esophagus	NA	human	GI_ESOPHAGUS	PrimaryTissue	3_TssFlnkU_E079.bed	2.50166e-77	12249
hyper	67	chromHMM_state3_TssFlnkU	77.2358	1.62156	1957	22	27	57	57	35.3	14808	57792	709102	chromHMM_state3_TssFlnkU Lung human	Lung	NA	human	LUNG	PrimaryTissue	3_TssFlnkU_E096.bed	2.58831e-77	11622
hyper	3	chromHMM_state3_TssFlnkU	71.9349	1.77658	1317	23	16	74	74	37.7	9069	58432	714841	chromHMM_state3_TssFlnkU H1_BMP4_Derived_Trophoblast_Cultured_Cells human	H1_BMP4_Derived_Trophoblast_Cultured_Cells	NA	human	ESC_DERIVED	ESCDerived	3_TssFlnkU_E005.bed	4.9503e-72	6440
hyper	56	chromHMM_state3_TssFlnkU	71.2779	1.43495	3155	24	37	25	37	28.7	27072	56594	696838	chromHMM_state3_TssFlnkU Fetal_Adrenal_Gland human	Fetal_Adrenal_Gland	NA	human	ADRENAL	PrimaryTissue	3_TssFlnkU_E080.bed	2.1534e-71	18561
hyper	40	chromHMM_state3_TssFlnkU	71.2497	1.39811	3658	25	42	15	42	27.3	32262	56091	691648	chromHMM_state3_TssFlnkU Penis_Foreskin_Melanocyte_Primary_Cells_skin03 human	Penis_Foreskin_Melanocyte_Primary_Cells_skin03	NA	human	SKIN	PrimaryCulture	3_TssFlnkU_E061.bed	2.20572e-71	22827
hyper	8	chromHMM_state3_TssFlnkU	67.4803	2.42083	573	26	3	89	89	39.3	2884	59176	721026	chromHMM_state3_TssFlnkU hESC_Derived_CD56+_Ectoderm_Cultured_Cells human	hESC_Derived_CD56+_Ectoderm_Cultured_Cells	NA	human	ESC_DERIVED	ESCDerived	3_TssFlnkU_E012.bed	1.24737e-67	3564
hyper	17	chromHMM_state3_TssFlnkU	66.8929	1.58297	1855	27	30	60	60	39	14362	57894	709548	chromHMM_state3_TssFlnkU iPS_DF_19.11_Cell_Line human	iPS_DF_19.11_Cell_Line	NA	human	IPSC	PrimaryCulture	3_TssFlnkU_E022.bed	4.64455e-67	9999
hyper	7	chromHMM_state3_TssFlnkU	66.5829	2.12757	744	28	4	88	88	40	4265	59005	719645	chromHMM_state3_TssFlnkU hESC_Derived_CD184+_Endoderm_Cultured_Cells human	hESC_Derived_CD184+_Endoderm_Cultured_Cells	NA	human	ESC_DERIVED	ESCDerived	3_TssFlnkU_E011.bed	9.14402e-67	6097
hyper	49	chromHMM_state3_TssFlnkU	65.4679	1.42332	3014	29	38	30	38	32.3	26047	56735	697863	chromHMM_state3_TssFlnkU Brain_Inferior_Temporal_Lobe human	Brain_Inferior_Temporal_Lobe	NA	human	BRAIN	PrimaryTissue	3_TssFlnkU_E072.bed	1.15065e-65	26370
hyper	80	chromHMM_state3_TssFlnkU	65.3115	1.31636	4980	30	52	2	52	28	46773	54769	677137	chromHMM_state3_TssFlnkU Stomach_Smooth_Muscle human	Stomach_Smooth_Muscle	NA	human	GI_STOMACH	PrimaryTissue	3_TssFlnkU_E111.bed	1.59427e-65	35349
hyper	14	chromHMM_state3_TssFlnkU	56.4356	1.81957	951	31	15	85	85	43.7	6378	58798	717532	chromHMM_state3_TssFlnkU iPS-18_Cell_Line human	iPS-18_Cell_Line	NA	human	IPSC	PrimaryCulture	3_TssFlnkU_E019.bed	1.15954e-56	8822
hyper	15	chromHMM_state3_TssFlnkU	55.1568	1.76319	1025	32	17	83	83	44	7096	58724	716814	chromHMM_state3_TssFlnkU iPS-20b_Cell_Line human	iPS-20b_Cell_Line	NA	human	IPSC	PrimaryCulture	3_TssFlnkU_E020.bed	2.13436e-55	12850
hyper	38	chromHMM_state3_TssFlnkU	52.3308	1.35814	3145	33	49	26	49	36	28451	56604	695459	chromHMM_state3_TssFlnkU Penis_Foreskin_Keratinocyte_Primary_Cells_skin03 human	Penis_Foreskin_Keratinocyte_Primary_Cells_skin03	NA	human	SKIN	PrimaryCulture	3_TssFlnkU_E058.bed	1.38654e-52	24032
hyper	71	chromHMM_state3_TssFlnkU	47.4485	1.64434	1117	34	24	81	81	46.3	8291	58632	715619	chromHMM_state3_TssFlnkU Psoas_Muscle human	Psoas_Muscle	NA	human	MUSCLE	PrimaryTissue	3_TssFlnkU_E100.bed	1.02619e-47	9866
hyper	74	chromHMM_state3_TssFlnkU	47.0696	1.39002	2431	35	43	41	43	39.7	21434	57318	702476	chromHMM_state3_TssFlnkU Rectal_Smooth_Muscle human	Rectal_Smooth_Muscle	NA	human	GI_RECTUM	PrimaryTissue	3_TssFlnkU_E103.bed	2.38513e-47	21805
hyper	97	chromHMM_state3_TssFlnkU	43.6917	1.38318	2313	36	45	47	47	42.7	20480	57436	703430	chromHMM_state3_TssFlnkU NHLF_Lung_Fibroblasts human	NHLF_Lung_Fibroblasts	NA	human	LUNG	PrimaryCulture	3_TssFlnkU_E128.bed	5.53664e-44	20654
hyper	51	chromHMM_state3_TssFlnkU	42.9645	1.38512	2253	37	44	48	48	43	19916	57496	703994	chromHMM_state3_TssFlnkU Brain_Substantia_Nigra human	Brain_Substantia_Nigra	NA	human	BRAIN	PrimaryTissue	3_TssFlnkU_E074.bed	2.87448e-43	22161
hyper	34	chromHMM_state3_TssFlnkU	42.6786	1.26867	4195	38	57	7	57	34	40667	55554	683243	chromHMM_state3_TssFlnkU Chondrocytes_from_Bone_Marrow_Derived_Mesenchymal_Stem_	Chondrocytes_from_Bone_Marrow_Derived_Mesenchymal_Stem_Cell_Cultured_Cells	NA	human	STROMAL_CONNECTIVE	PrimaryCulture	3_TssFlnkU_E049.bed	5.40566e-43	34151
hyper	4	chromHMM_state3_TssFlnkU	42.5934	1.66325	957	39	21	84	84	48	7016	58792	716894	chromHMM_state3_TssFlnkU H1_Derived_Mesenchymal_Stem_Cells human	H1_Derived_Mesenchymal_Stem_Cells	NA	human	ESC_DERIVED	ESCDerived	3_TssFlnkU_E006.bed	6.40921e-43	5102
hyper	53	chromHMM_state3_TssFlnkU	41.5	1.40647	1986	40	40	55	55	45	17274	57763	706636	chromHMM_state3_TssFlnkU Colon_Smooth_Muscle human	Colon_Smooth_Muscle	NA	human	GI_COLON	PrimaryTissue	3_TssFlnkU_E076.bed	7.74833e-42	20561
hyper	18	chromHMM_state3_TssFlnkU	41.0078	1.33071	2776	41	51	35	51	42.3	25570	56973	698340	chromHMM_state3_TssFlnkU Bone_Marrow_Derived_Mesenchymal_Stem_Cell_Cultured_Cell	Bone_Marrow_Derived_Mesenchymal_Stem_Cell_Cultured_Cells	NA	human	STROMAL_CONNECTIVE	PrimaryCulture	3_TssFlnkU_E026.bed	2.34759e-41	31874
hyper	45	chromHMM_state3_TssFlnkU	38.816	1.3726	2137	42	47	50	50	46.3	19048	57612	704862	chromHMM_state3_TssFlnkU Brain_Angular_Gyrus human	Brain_Angular_Gyrus	NA	human	BRAIN	PrimaryTissue	3_TssFlnkU_E067.bed	3.56457e-39	20884
hyper	89	chromHMM_state3_TssFlnkU	38.0875	1.37521	2070	43	46	51	51	46.7	18411	57679	705499	chromHMM_state3_TssFlnkU HSMM_Skeletal_Muscle_Myoblasts human	HSMM_Skeletal_Muscle_Myoblasts	NA	human	MUSCLE	PrimaryCulture	3_TssFlnkU_E120.bed	1.86322e-38	18226
hyper	83	chromHMM_state3_TssFlnkU	36.4535	1.31034	2731	44	53	38	53	45	25528	57018	698382	chromHMM_state3_TssFlnkU A549_EtOH_0.02pct_Lung_Carcinoma human	A549_EtOH_0.02pct_Lung_Carcinoma	NA	human	LUNG	CellLine	3_TssFlnkU_E114.bed	7.83917e-37	35595
hyper	60	chromHMM_state3_TssFlnkU	29.6416	1.28621	2517	45	56	39	56	46.7	23934	57232	699976	chromHMM_state3_TssFlnkU Fetal_Muscle_Trunk human	Fetal_Muscle_Trunk	NA	human	MUSCLE	PrimaryTissue	3_TssFlnkU_E089.bed	4.97102e-30	12927
hyper	69	chromHMM_state3_TssFlnkU	28.7075	1.42226	1263	46	39	76	76	53.7	10827	58486	713083	chromHMM_state3_TssFlnkU Pancreas human	Pancreas	NA	human	PANCREAS	PrimaryTissue	3_TssFlnkU_E098.bed	4.17845e-29	8232
hyper	90	chromHMM_state3_TssFlnkU	28.578	1.33624	1832	47	50	62	62	53	16740	57917	707170	chromHMM_state3_TssFlnkU HSMMtube_Skeletal_Muscle_Myotubes_Derived_from_HSMM hum	HSMMtube_Skeletal_Muscle_Myotubes_Derived_from_HSMM	NA	human	MUSCLE	PrimaryCulture	3_TssFlnkU_E121.bed	5.50963e-29	19244
hyper	98	chromHMM_state3_TssFlnkU	27.8126	1.22626	3589	48	59	18	59	41.7	35858	56160	688052	chromHMM_state3_TssFlnkU Osteoblasts human	Osteoblasts	NA	human	BONE	PrimaryCulture	3_TssFlnkU_E129.bed	3.14342e-28	33911
hyper	62	chromHMM_state3_TssFlnkU	27.1931	1.23561	3249	49	58	23	58	43.3	32192	56500	691718	chromHMM_state3_TssFlnkU Fetal_Placenta human	Fetal_Placenta	NA	human	PLACENTA	PrimaryTissue	3_TssFlnkU_E091.bed	1.28215e-27	17476
hyper	72	chromHMM_state3_TssFlnkU	27.0375	1.22328	3565	50	61	19	61	43.3	35698	56184	688212	chromHMM_state3_TssFlnkU Rectal_Mucosa.Donor_29 human	Rectal_Mucosa.Donor_29	NA	human	GI_RECTUM	PrimaryTissue	3_TssFlnkU_E101.bed	1.79779e-27	33022
hyper	73	chromHMM_state3_TssFlnkU	27.025	1.22106	3630	51	62	16	62	43	36419	56119	687491	chromHMM_state3_TssFlnkU Rectal_Mucosa.Donor_31 human	Rectal_Mucosa.Donor_31	NA	human	GI_RECTUM	PrimaryTissue	3_TssFlnkU_E102.bed	1.81415e-27	28107
hyper	94	chromHMM_state3_TssFlnkU	25.7937	1.22374	3371	52	60	21	60	44.3	33723	56378	690187	chromHMM_state3_TssFlnkU NH-A_Astrocytes human	NH-A_Astrocytes	NA	human	BRAIN	PrimaryCulture	3_TssFlnkU_E125.bed	3.0305e-26	27322
hyper	95	chromHMM_state3_TssFlnkU	24.558	1.30519	1837	53	54	61	61	56	17176	57912	706734	chromHMM_state3_TssFlnkU NHDF-Ad_Adult_Dermal_Fibroblasts human	NHDF-Ad_Adult_Dermal_Fibroblasts	NA	human	SKIN	PrimaryCulture	3_TssFlnkU_E126.bed	5.11663e-25	21830
hyper	91	chromHMM_state3_TssFlnkU	22.1802	1.18905	3908	54	66	10	66	43.3	40239	55841	683671	chromHMM_state3_TssFlnkU HUVEC_Umbilical_Vein_Endothelial_Cells human	HUVEC_Umbilical_Vein_Endothelial_Cells	NA	human	VASCULAR	PrimaryCulture	3_TssFlnkU_E122.bed	1.19851e-22	28267
hyper	65	chromHMM_state3_TssFlnkU	20.4435	1.59867	514	55	29	91	91	58.3	3908	59235	720002	chromHMM_state3_TssFlnkU Gastric human	Gastric	NA	human	GI_STOMACH	PrimaryTissue	3_TssFlnkU_E094.bed	6.41697e-21	3664
hyper	52	chromHMM_state3_TssFlnkU	20.1667	1.20174	3109	56	65	27	65	49.3	31621	56640	692289	chromHMM_state3_TssFlnkU Colonic_Mucosa human	Colonic_Mucosa	NA	human	GI_COLON	PrimaryTissue	3_TssFlnkU_E075.bed	1.19223e-20	22169
hyper	43	chromHMM_state3_TssFlnkU	18.5592	1.70527	366	57	20	92	92	56.3	2607	59383	721303	chromHMM_state3_TssFlnkU Aorta human	Aorta	NA	human	VASCULAR	PrimaryTissue	3_TssFlnkU_E065.bed	4.74408e-19	4211
hyper	77	chromHMM_state3_TssFlnkU	18.3861	1.40167	851	58	41	86	86	61.7	7386	58898	716524	chromHMM_state3_TssFlnkU Sigmoid_Colon human	Sigmoid_Colon	NA	human	GI_COLON	PrimaryTissue	3_TssFlnkU_E106.bed	6.94573e-19	7527
hyper	5	chromHMM_state3_TssFlnkU	18.2151	1.90331	256	59	12	94	94	55	1633	59493	722277	chromHMM_state3_TssFlnkU H1_Derived_Neuronal_Progenitor_Cultured_Cells human	H1_Derived_Neuronal_Progenitor_Cultured_Cells	NA	human	ESC_DERIVED	ESCDerived	3_TssFlnkU_E007.bed	1.01231e-18	1624
hyper	70	chromHMM_state3_TssFlnkU	16.8267	1.51787	519	60	33	90	90	61	4155	59230	719755	chromHMM_state3_TssFlnkU Placenta_Amnion human	Placenta_Amnion	NA	human	PLACENTA	PrimaryTissue	3_TssFlnkU_E099.bed	2.43418e-17	3257
hyper	2	chromHMM_state3_TssFlnkU	16.2913	1.84571	248	61	14	95	95	56.7	1631	59501	722279	chromHMM_state3_TssFlnkU H1_BMP4_Derived_Mesendoderm_Cultured_Cells human	H1_BMP4_Derived_Mesendoderm_Cultured_Cells	NA	human	ESC_DERIVED	ESCDerived	3_TssFlnkU_E004.bed	8.21518e-17	2419
hyper	96	chromHMM_state3_TssFlnkU	16.2768	1.16418	3607	62	67	17	67	48.7	37861	56142	686049	chromHMM_state3_TssFlnkU NHEK-Epidermal_Keratinocytes human	NHEK-Epidermal_Keratinocytes	NA	human	SKIN	PrimaryCulture	3_TssFlnkU_E127.bed	8.35704e-17	32969
hyper	87	chromHMM_state3_TssFlnkU	15.7404	1.2028	2337	63	64	45	64	57.3	23697	57412	700213	chromHMM_state3_TssFlnkU HepG2_Hepatocellular_Carcinoma human	HepG2_Hepatocellular_Carcinoma	NA	human	LIVER	CellLine	3_TssFlnkU_E118.bed	2.82792e-16	25640
hyper	6	chromHMM_state3_TssFlnkU	13.9197	1.93307	184	64	10	97	97	57	1155	59565	722755	chromHMM_state3_TssFlnkU H9_Cell_Line human	H9_Cell_Line	NA	human	ESC	PrimaryCulture	3_TssFlnkU_E008.bed	1.84232e-14	2019
hyper	39	chromHMM_state3_TssFlnkU	13.4447	1.21268	1798	65	63	64	65	64	18059	57951	705851	chromHMM_state3_TssFlnkU Penis_Foreskin_Melanocyte_Primary_Cells_skin01 human	Penis_Foreskin_Melanocyte_Primary_Cells_skin01	NA	human	SKIN	PrimaryCulture	3_TssFlnkU_E059.bed	5.41487e-14	13964
hyper	42	chromHMM_state3_TssFlnkU	9.35392	1.10378	4668	66	69	5	69	46.7	51617	55081	672293	chromHMM_state3_TssFlnkU Adipose_Nuclei human	Adipose_Nuclei	NA	human	FAT	PrimaryTissue	3_TssFlnkU_E063.bed	6.57303e-10	30610
hyper	16	chromHMM_state3_TssFlnkU	6.89961	1.8622	94	67	13	98	98	59.3	612	59655	723298	chromHMM_state3_TssFlnkU iPS_DF_6.9_Cell_Line human	iPS_DF_6.9_Cell_Line	NA	human	IPSC	PrimaryCulture	3_TssFlnkU_E021.bed	1.82043e-07	665
hyper	54	chromHMM_state3_TssFlnkU	6.89854	1.15866	1435	68	68	71	71	69	15055	58314	708855	chromHMM_state3_TssFlnkU Duodenum_Smooth_Muscle human	Duodenum_Smooth_Muscle	NA	human	GI_DUODENUM	PrimaryTissue	3_TssFlnkU_E078.bed	1.82043e-07	20014
hyper	79	chromHMM_state3_TssFlnkU	4.89106	1.2934	322	69	55	93	93	72.3	3020	59427	720890	chromHMM_state3_TssFlnkU Small_Intestine human	Small_Intestine	NA	human	GI_INTESTINE	PrimaryTissue	3_TssFlnkU_E109.bed	1.82524e-05	3824
hyper	86	chromHMM_state3_TssFlnkU	4.82834	1.08138	3364	70	70	22	70	54	37852	56385	686058	chromHMM_state3_TssFlnkU HeLa-S3_Cervical_Carcinoma human	HeLa-S3_Cervical_Carcinoma	NA	human	CERVIX	CellLine	3_TssFlnkU_E117.bed	2.07869e-05	32346
hyper	37	chromHMM_state3_TssFlnkU	3.58553	1.06421	3675	71	71	13	71	51.7	41996	56074	681914	chromHMM_state3_TssFlnkU Penis_Foreskin_Fibroblast_Primary_Cells_skin02 human	Penis_Foreskin_Fibroblast_Primary_Cells_skin02	NA	human	SKIN	PrimaryCulture	3_TssFlnkU_E056.bed	0.000358455	27039
hyper	93	chromHMM_state3_TssFlnkU	2.05787	1.03706	5130	72	72	1	72	48.3	60118	54619	663792	chromHMM_state3_TssFlnkU Monocytes-CD14+_RO01746 human	Monocytes-CD14+_RO01746	NA	human	BLOOD	PrimaryCell	3_TssFlnkU_E124.bed	0.011913	47263
hyper	44	chromHMM_state3_TssFlnkU	1.46907	1.03219	3913	73	73	9	73	51.7	46025	55836	677885	chromHMM_state3_TssFlnkU Adult_Liver human	Adult_Liver	NA	human	LIVER	PrimaryTissue	3_TssFlnkU_E066.bed	0.0455865	32778
hyper	85	chromHMM_state3_TssFlnkU	1.24284	1.03141	3032	74	74	29	74	59	35672	56717	688238	chromHMM_state3_TssFlnkU GM12878_Lymphoblastoid human	GM12878_Lymphoblastoid	NA	human	BLOOD	PrimaryCulture	3_TssFlnkU_E116.bed	0.0757108	41644
hyper	81	chromHMM_state3_TssFlnkU	0.647991	1.01928	1803	75	75	63	75	71	21444	57946	702466	chromHMM_state3_TssFlnkU Thymus human	Thymus	NA	human	THYMUS	PrimaryTissue	3_TssFlnkU_E112.bed	0.293883	18593
hyper	88	chromHMM_state3_TssFlnkU	0.418197	1.00617	2861	76	76	32	76	61.3	34461	56888	689449	chromHMM_state3_TssFlnkU HMEC_Mammary_Epithelial human	HMEC_Mammary_Epithelial	NA	human	BREAST	PrimaryCulture	3_TssFlnkU_E119.bed	0.492284	24584
hyper	82	chromHMM_state3_TssFlnkU	0.277956	0.998195	1092	77	77	82	82	78.7	13254	58657	710656	chromHMM_state3_TssFlnkU Spleen human	Spleen	NA	human	SPLEEN	PrimaryTissue	3_TssFlnkU_E113.bed	0.671088	9125
hyper	59	chromHMM_state3_TssFlnkU	0.19903	0.978107	215	78	78	96	96	84	2663	59534	721247	chromHMM_state3_TssFlnkU Pancreatic_Islets human	Pancreatic_Islets	NA	human	PANCREAS	PrimaryTissue	3_TssFlnkU_E087.bed	0.794515	6797
hyper	78	chromHMM_state3_TssFlnkU	0.0214685	0.973527	4418	79	79	6	79	54.7	54873	55331	669037	chromHMM_state3_TssFlnkU Skeletal_Muscle_Female human	Skeletal_Muscle_Female	NA	human	MUSCLE	PrimaryTissue	3_TssFlnkU_E108.bed	1	36292
hyper	19	chromHMM_state3_TssFlnkU	0.00415076	0.950389	2337	80	80	45	80	68.3	29732	57412	694178	chromHMM_state3_TssFlnkU CD14_Primary_Cells human	CD14_Primary_Cells	NA	human	BLOOD	PrimaryCell	3_TssFlnkU_E029.bed	1	18259
hyper	64	chromHMM_state3_TssFlnkU	0.00174524	0.94419	2342	81	81	44	81	68.7	29983	57407	693927	chromHMM_state3_TssFlnkU Fetal_Thymus human	Fetal_Thymus	NA	human	THYMUS	PrimaryTissue	3_TssFlnkU_E093.bed	1	17552
hyper	35	chromHMM_state3_TssFlnkU	0	0.778156	3846	82	84	11	84	59	58803	55903	665107	chromHMM_state3_TssFlnkU Mobilized_CD34_Primary_Cells_Female human	Mobilized_CD34_Primary_Cells_Female	NA	human	BLOOD	PrimaryCell	3_TssFlnkU_E050.bed	1	28437
hyper	26	chromHMM_state3_TssFlnkU	0	0.813248	3162	82	82	24	82	62.7	46543	56587	677367	chromHMM_state3_TssFlnkU CD4+_CD25-_IL17-_PMA-Ionomycin_stimulated_MACS_purified	CD4+_CD25-_IL17-_PMA-Ionomycin_stimulated_MACS_purified_Th_Primary_Cells	NA	human	BLOOD	PrimaryCell	3_TssFlnkU_E041.bed	1	34041
hyper	24	chromHMM_state3_TssFlnkU	0	0.797958	2813	82	83	33	83	66	42209	56936	681701	chromHMM_state3_TssFlnkU CD4+_CD25-_CD45RA+_Naive_Primary_Cells human	CD4+_CD25-_CD45RA+_Naive_Primary_Cells	NA	human	BLOOD	PrimaryCell	3_TssFlnkU_E039.bed	1	30181
hyper	84	chromHMM_state3_TssFlnkU	0	0.68165	2461	82	88	40	88	70	42917	57288	680993	chromHMM_state3_TssFlnkU Dnd41_TCell_Leukemia human	Dnd41_TCell_Leukemia	NA	human	BLOOD	CellLine	3_TssFlnkU_E115.bed	1	25612
hyper	31	chromHMM_state3_TssFlnkU	0	0.599912	2369	82	93	42	93	72.3	46612	57380	677298	chromHMM_state3_TssFlnkU CD56_Primary_Cells human	CD56_Primary_Cells	NA	human	BLOOD	PrimaryCell	3_TssFlnkU_E046.bed	1	22766
hyper	22	chromHMM_state3_TssFlnkU	0	0.76603	1993	82	85	54	85	73.7	31205	57756	692705	chromHMM_state3_TssFlnkU CD4_Memory_Primary_Cells human	CD4_Memory_Primary_Cells	NA	human	BLOOD	PrimaryCell	3_TssFlnkU_E037.bed	1	26444
hyper	20	chromHMM_state3_TssFlnkU	0	0.733999	2000	82	87	53	87	74	32618	57749	691292	chromHMM_state3_TssFlnkU CD19_Primary_Cells_Peripheral_UW human	CD19_Primary_Cells_Peripheral_UW	NA	human	BLOOD	PrimaryCell	3_TssFlnkU_E032.bed	1	19148
hyper	27	chromHMM_state3_TssFlnkU	0	0.630857	2241	82	91	49	91	74	42115	57508	681795	chromHMM_state3_TssFlnkU CD4+_CD25-_IL17+_PMA-Ionomcyin_stimulated_Th17_Primary_	CD4+_CD25-_IL17+_PMA-Ionomcyin_stimulated_Th17_Primary_Cells	NA	human	BLOOD	PrimaryCell	3_TssFlnkU_E042.bed	1	28510
hyper	21	chromHMM_state3_TssFlnkU	0	0.499598	2060	82	96	52	96	76.7	48290	57689	675620	chromHMM_state3_TssFlnkU CD3_Primary_Cells_Peripheral_UW human	CD3_Primary_Cells_Peripheral_UW	NA	human	BLOOD	PrimaryCell	3_TssFlnkU_E034.bed	1	24633
hyper	29	chromHMM_state3_TssFlnkU	0	0.525654	1958	82	94	56	94	77.3	43834	57791	680076	chromHMM_state3_TssFlnkU CD4+_CD25+_CD127-_Treg_Primary_Cells human	CD4+_CD25+_CD127-_Treg_Primary_Cells	NA	human	BLOOD	PrimaryCell	3_TssFlnkU_E044.bed	1	28231
hyper	30	chromHMM_state3_TssFlnkU	0	0.642546	1487	82	89	68	89	79.7	27656	58262	696254	chromHMM_state3_TssFlnkU CD4+_CD25int_CD127+_Tmem_Primary_Cells human	CD4+_CD25int_CD127+_Tmem_Primary_Cells	NA	human	BLOOD	PrimaryCell	3_TssFlnkU_E045.bed	1	23332
hyper	33	chromHMM_state3_TssFlnkU	0	0.73669	1381	82	86	72	86	80	22527	58368	701383	chromHMM_state3_TssFlnkU CD8_Memory_Primary_Cells human	CD8_Memory_Primary_Cells	NA	human	BLOOD	PrimaryCell	3_TssFlnkU_E048.bed	1	20280
hyper	32	chromHMM_state3_TssFlnkU	0	0.611256	1450	82	92	70	92	81.3	28304	58299	695606	chromHMM_state3_TssFlnkU CD8_Naive_Primary_Cells human	CD8_Naive_Primary_Cells	NA	human	BLOOD	PrimaryCell	3_TssFlnkU_E047.bed	1	21470
hyper	28	chromHMM_state3_TssFlnkU	0	0.458517	1481	82	97	69	97	82.7	38021	58268	685889	chromHMM_state3_TssFlnkU CD4+_CD25-_Th_Primary_Cells human	CD4+_CD25-_Th_Primary_Cells	NA	human	BLOOD	PrimaryCell	3_TssFlnkU_E043.bed	1	20623
hyper	25	chromHMM_state3_TssFlnkU	0	0.505814	1324	82	95	73	95	83.3	31042	58425	692868	chromHMM_state3_TssFlnkU CD4+_CD25-_CD45RO+_Memory_Primary_Cells human	CD4+_CD25-_CD45RO+_Memory_Primary_Cells	NA	human	BLOOD	PrimaryCell	3_TssFlnkU_E040.bed	1	23139
hyper	23	chromHMM_state3_TssFlnkU	0	0.636116	1159	82	90	79	90	83.7	21833	58590	702077	chromHMM_state3_TssFlnkU CD4_Naive_Primary_Cells human	CD4_Naive_Primary_Cells	NA	human	BLOOD	PrimaryCell	3_TssFlnkU_E038.bed	1	19752
hyper	41	chromHMM_state3_TssFlnkU	0	0.240415	1237	82	98	78	98	86	58512	58512	665398	chromHMM_state3_TssFlnkU Peripheral_Blood_Mononuclear_Primary_Cells human	Peripheral_Blood_Mononuclear_Primary_Cells	NA	human	BLOOD	PrimaryCell	3_TssFlnkU_E062.bed	1	18835
hyper	69	chromHMM_state4_TssFlnkD	Inf	2.12572	5233	1	6	1	6	2.67	31277	54516	692633	chromHMM_state4_TssFlnkD Pancreas human	Pancreas	NA	human	PANCREAS	PrimaryTissue	4_TssFlnkD_E098.bed	0	22806
hyper	76	chromHMM_state4_TssFlnkD	Inf	2.76577	3712	1	1	7	7	3	16932	56037	706978	chromHMM_state4_TssFlnkD Right_Ventricle human	Right_Ventricle	NA	human	HEART	PrimaryTissue	4_TssFlnkD_E105.bed	0	13697
hyper	17	chromHMM_state4_TssFlnkD	Inf	2.09999	4125	1	7	4	7	4	24692	55624	699218	chromHMM_state4_TssFlnkD iPS_DF_19.11_Cell_Line human	iPS_DF_19.11_Cell_Line	NA	human	IPSC	PrimaryCulture	4_TssFlnkD_E022.bed	0	23786
hyper	75	chromHMM_state4_TssFlnkD	314.822	2.75699	2185	4	2	28	28	11.3	9831	57564	714079	chromHMM_state4_TssFlnkD Right_Atrium human	Right_Atrium	NA	human	HEART	PrimaryTissue	4_TssFlnkD_E104.bed	1.39620742497827e-314	10236
hyper	68	chromHMM_state4_TssFlnkD	280.032	2.40442	2493	5	3	18	18	8.67	12876	57256	711034	chromHMM_state4_TssFlnkD Ovary human	Ovary	NA	human	OVARY	PrimaryTissue	4_TssFlnkD_E097.bed	6.89081e-280	12472
hyper	37	chromHMM_state4_TssFlnkD	224.067	2.00277	3017	6	12	11	12	9.67	18725	56732	705185	chromHMM_state4_TssFlnkD Penis_Foreskin_Fibroblast_Primary_Cells_skin02 human	Penis_Foreskin_Fibroblast_Primary_Cells_skin02	NA	human	SKIN	PrimaryCulture	4_TssFlnkD_E056.bed	5.29252e-224	27343
hyper	24	chromHMM_state4_TssFlnkD	214.87	2.05705	2695	7	10	15	15	10.7	16250	57054	707660	chromHMM_state4_TssFlnkD CD4+_CD25-_CD45RA+_Naive_Primary_Cells human	CD4+_CD25-_CD45RA+_Naive_Primary_Cells	NA	human	BLOOD	PrimaryCell	4_TssFlnkD_E039.bed	7.13717e-215	20671
hyper	4	chromHMM_state4_TssFlnkD	212.969	1.79977	3913	8	19	6	19	11	27131	55836	696779	chromHMM_state4_TssFlnkD H1_Derived_Mesenchymal_Stem_Cells human	H1_Derived_Mesenchymal_Stem_Cells	NA	human	ESC_DERIVED	ESCDerived	4_TssFlnkD_E006.bed	4.97109e-213	22096
hyper	65	chromHMM_state4_TssFlnkD	205.227	2.18178	2230	9	5	24	24	12.7	12639	57519	711271	chromHMM_state4_TssFlnkD Gastric human	Gastric	NA	human	GI_STOMACH	PrimaryTissue	4_TssFlnkD_E094.bed	2.44159e-205	14165
hyper	42	chromHMM_state4_TssFlnkD	188.827	1.63836	4828	10	29	2	29	13.7	36864	54921	687046	chromHMM_state4_TssFlnkD Adipose_Nuclei human	Adipose_Nuclei	NA	human	FAT	PrimaryTissue	4_TssFlnkD_E063.bed	5.51999e-189	31102
hyper	38	chromHMM_state4_TssFlnkD	188.681	1.83482	3240	11	17	9	17	12.3	21935	56509	701975	chromHMM_state4_TssFlnkD Penis_Foreskin_Keratinocyte_Primary_Cells_skin03 human	Penis_Foreskin_Keratinocyte_Primary_Cells_skin03	NA	human	SKIN	PrimaryCulture	4_TssFlnkD_E058.bed	7.02096e-189	27080
hyper	40	chromHMM_state4_TssFlnkD	150.213	2.02062	1948	12	11	36	36	19.7	11876	57801	712034	chromHMM_state4_TssFlnkD Penis_Foreskin_Melanocyte_Primary_Cells_skin03 human	Penis_Foreskin_Melanocyte_Primary_Cells_skin03	NA	human	SKIN	PrimaryCulture	4_TssFlnkD_E061.bed	1.89189e-150	16770
hyper	94	chromHMM_state4_TssFlnkD	149.653	1.76131	2899	13	22	13	22	16	20369	56850	703541	chromHMM_state4_TssFlnkD NH-A_Astrocytes human	NH-A_Astrocytes	NA	human	BRAIN	PrimaryCulture	4_TssFlnkD_E125.bed	6.33363e-150	23368
hyper	11	chromHMM_state4_TssFlnkD	147.912	1.84741	2461	14	16	19	19	16.3	16450	57288	707460	chromHMM_state4_TssFlnkD HUES6_Cell_Line human	HUES6_Cell_Line	NA	human	ESC	PrimaryCulture	4_TssFlnkD_E015.bed	3.24405e-148	27133
hyper	34	chromHMM_state4_TssFlnkD	131.343	1.59939	3613	15	35	8	35	19.3	28004	56136	695906	chromHMM_state4_TssFlnkD Chondrocytes_from_Bone_Marrow_Derived_Mesenchymal_Stem_	Chondrocytes_from_Bone_Marrow_Derived_Mesenchymal_Stem_Cell_Cultured_Cells	NA	human	STROMAL_CONNECTIVE	PrimaryCulture	4_TssFlnkD_E049.bed	1.12262e-131	30688
hyper	39	chromHMM_state4_TssFlnkD	130.63	1.80966	2305	16	18	22	22	18.7	15703	57444	708207	chromHMM_state4_TssFlnkD Penis_Foreskin_Melanocyte_Primary_Cells_skin01 human	Penis_Foreskin_Melanocyte_Primary_Cells_skin01	NA	human	SKIN	PrimaryCulture	4_TssFlnkD_E059.bed	5.4263e-131	18887
hyper	36	chromHMM_state4_TssFlnkD	126.468	1.73222	2572	17	24	17	24	19.3	18323	57177	705587	chromHMM_state4_TssFlnkD Penis_Foreskin_Fibroblast_Primary_Cells_skin01 human	Penis_Foreskin_Fibroblast_Primary_Cells_skin01	NA	human	SKIN	PrimaryCulture	4_TssFlnkD_E055.bed	7.42823e-127	32589
hyper	16	chromHMM_state4_TssFlnkD	124.087	2.2542	1237	18	4	70	70	30.7	6726	58512	717184	chromHMM_state4_TssFlnkD iPS_DF_6.9_Cell_Line human	iPS_DF_6.9_Cell_Line	NA	human	IPSC	PrimaryCulture	4_TssFlnkD_E021.bed	1.68463e-124	8107
hyper	35	chromHMM_state4_TssFlnkD	123.894	1.50782	4421	19	51	3	51	24.3	36432	55328	687478	chromHMM_state4_TssFlnkD Mobilized_CD34_Primary_Cells_Female human	Mobilized_CD34_Primary_Cells_Female	NA	human	BLOOD	PrimaryCell	4_TssFlnkD_E050.bed	2.4929e-124	31990
hyper	5	chromHMM_state4_TssFlnkD	117.66	2.07217	1422	20	9	57	57	28.7	8418	58327	715492	chromHMM_state4_TssFlnkD H1_Derived_Neuronal_Progenitor_Cultured_Cells human	H1_Derived_Neuronal_Progenitor_Cultured_Cells	NA	human	ESC_DERIVED	ESCDerived	4_TssFlnkD_E007.bed	4.0594e-118	13171
hyper	55	chromHMM_state4_TssFlnkD	108.98	1.96062	1515	21	14	51	51	28.7	9480	58234	714430	chromHMM_state4_TssFlnkD Esophagus human	Esophagus	NA	human	GI_ESOPHAGUS	PrimaryTissue	4_TssFlnkD_E079.bed	1.84875e-109	8908
hyper	96	chromHMM_state4_TssFlnkD	103.065	1.70637	2189	22	25	27	27	24.7	15782	57560	708128	chromHMM_state4_TssFlnkD NHEK-Epidermal_Keratinocytes human	NHEK-Epidermal_Keratinocytes	NA	human	SKIN	PrimaryCulture	4_TssFlnkD_E127.bed	1.45205e-103	22766
hyper	26	chromHMM_state4_TssFlnkD	99.2942	1.76941	1863	23	21	38	38	27.3	12932	57886	710978	chromHMM_state4_TssFlnkD CD4+_CD25-_IL17-_PMA-Ionomycin_stimulated_MACS_purified	CD4+_CD25-_IL17-_PMA-Ionomycin_stimulated_MACS_purified_Th_Primary_Cells	NA	human	BLOOD	PrimaryCell	4_TssFlnkD_E041.bed	8.18592e-100	18228
hyper	92	chromHMM_state4_TssFlnkD	95.9064	1.68876	2107	24	26	30	30	26.7	15337	57642	708573	chromHMM_state4_TssFlnkD K562_Leukemia human	K562_Leukemia	NA	human	BLOOD	PrimaryCulture	4_TssFlnkD_E123.bed	1.91597e-96	28881
hyper	66	chromHMM_state4_TssFlnkD	94.6669	2.08611	1119	25	8	76	76	36.3	6563	58630	717347	chromHMM_state4_TssFlnkD Left_Ventricle human	Left_Ventricle	NA	human	HEART	PrimaryTissue	4_TssFlnkD_E095.bed	3.19271e-95	7628
hyper	88	chromHMM_state4_TssFlnkD	93.3581	1.5125	3219	26	48	10	48	28	26265	56530	697645	chromHMM_state4_TssFlnkD HMEC_Mammary_Epithelial human	HMEC_Mammary_Epithelial	NA	human	BREAST	PrimaryCulture	4_TssFlnkD_E119.bed	6.25062e-94	20708
hyper	3	chromHMM_state4_TssFlnkD	85.6716	1.61496	2216	27	31	25	31	27.7	16863	57533	707047	chromHMM_state4_TssFlnkD H1_BMP4_Derived_Trophoblast_Cultured_Cells human	H1_BMP4_Derived_Trophoblast_Cultured_Cells	NA	human	ESC_DERIVED	ESCDerived	4_TssFlnkD_E005.bed	2.92435e-86	19785
hyper	70	chromHMM_state4_TssFlnkD	81.5071	1.62603	2048	28	30	32	32	30	15464	57701	708446	chromHMM_state4_TssFlnkD Placenta_Amnion human	Placenta_Amnion	NA	human	PLACENTA	PrimaryTissue	4_TssFlnkD_E099.bed	4.11813e-82	12372
hyper	14	chromHMM_state4_TssFlnkD	80.9035	1.66675	1851	29	28	39	39	32	13624	57898	710286	chromHMM_state4_TssFlnkD iPS-18_Cell_Line human	iPS-18_Cell_Line	NA	human	IPSC	PrimaryCulture	4_TssFlnkD_E019.bed	1.59624e-81	27919
hyper	87	chromHMM_state4_TssFlnkD	78.0906	1.51078	2679	30	49	16	49	31.7	21815	57070	702095	chromHMM_state4_TssFlnkD HepG2_Hepatocellular_Carcinoma human	HepG2_Hepatocellular_Carcinoma	NA	human	LIVER	CellLine	4_TssFlnkD_E118.bed	1.003e-78	35819
hyper	91	chromHMM_state4_TssFlnkD	75.908	1.49846	2703	31	54	14	54	33	22189	57046	701721	chromHMM_state4_TssFlnkD HUVEC_Umbilical_Vein_Endothelial_Cells human	HUVEC_Umbilical_Vein_Endothelial_Cells	NA	human	VASCULAR	PrimaryCulture	4_TssFlnkD_E122.bed	1.47804e-76	22197
hyper	49	chromHMM_state4_TssFlnkD	67.6306	1.59943	1799	32	34	41	41	35.7	13783	57950	710127	chromHMM_state4_TssFlnkD Brain_Inferior_Temporal_Lobe human	Brain_Inferior_Temporal_Lobe	NA	human	BRAIN	PrimaryTissue	4_TssFlnkD_E072.bed	2.71176e-68	21555
hyper	27	chromHMM_state4_TssFlnkD	67.4375	1.53935	2108	33	40	29	40	34	16799	57641	707111	chromHMM_state4_TssFlnkD CD4+_CD25-_IL17+_PMA-Ionomcyin_stimulated_Th17_Primary_	CD4+_CD25-_IL17+_PMA-Ionomcyin_stimulated_Th17_Primary_Cells	NA	human	BLOOD	PrimaryCell	4_TssFlnkD_E042.bed	4.10167e-68	22335
hyper	80	chromHMM_state4_TssFlnkD	66.4653	1.42788	3009	34	59	12	59	35	25923	56740	697987	chromHMM_state4_TssFlnkD Stomach_Smooth_Muscle human	Stomach_Smooth_Muscle	NA	human	GI_STOMACH	PrimaryTissue	4_TssFlnkD_E111.bed	3.73438e-67	31472
hyper	98	chromHMM_state4_TssFlnkD	66.3143	1.51356	2236	35	47	23	47	35	18129	57513	705781	chromHMM_state4_TssFlnkD Osteoblasts human	Osteoblasts	NA	human	BONE	PrimaryCulture	4_TssFlnkD_E129.bed	5.13559e-67	26018
hyper	32	chromHMM_state4_TssFlnkD	60.3521	1.51686	2005	36	46	33	46	38.3	16200	57744	707710	chromHMM_state4_TssFlnkD CD8_Naive_Primary_Cells human	CD8_Naive_Primary_Cells	NA	human	BLOOD	PrimaryCell	4_TssFlnkD_E047.bed	4.57733e-61	19563
hyper	71	chromHMM_state4_TssFlnkD	58.3048	1.79261	1030	37	20	83	83	46.7	7015	58719	716895	chromHMM_state4_TssFlnkD Psoas_Muscle human	Psoas_Muscle	NA	human	MUSCLE	PrimaryTissue	4_TssFlnkD_E100.bed	4.96624e-59	9677
hyper	9	chromHMM_state4_TssFlnkD	57.867	1.97917	770	38	13	91	91	47.3	4744	58979	719166	chromHMM_state4_TssFlnkD hESC_Derived_CD56+_Mesoderm_Cultured_Cells human	hESC_Derived_CD56+_Mesoderm_Cultured_Cells	NA	human	ESC_DERIVED	ESCDerived	4_TssFlnkD_E013.bed	1.32502e-58	8380
hyper	13	chromHMM_state4_TssFlnkD	50.6198	1.66988	1129	39	27	75	75	47	8254	58620	715656	chromHMM_state4_TssFlnkD IMR90_Cell_Line human	IMR90_Cell_Line	NA	human	LUNG	CellLine	4_TssFlnkD_E017.bed	2.28104e-51	10586
hyper	47	chromHMM_state4_TssFlnkD	50.0234	1.53453	1563	40	41	50	50	43.7	12454	58186	711456	chromHMM_state4_TssFlnkD Brain_Cingulate_Gyrus human	Brain_Cingulate_Gyrus	NA	human	BRAIN	PrimaryTissue	4_TssFlnkD_E069.bed	8.78032e-51	20528
hyper	97	chromHMM_state4_TssFlnkD	49.0029	1.6002	1283	41	33	66	66	46.7	9793	58466	714117	chromHMM_state4_TssFlnkD NHLF_Lung_Fibroblasts human	NHLF_Lung_Fibroblasts	NA	human	LUNG	PrimaryCulture	4_TssFlnkD_E128.bed	8.98085e-50	16006
hyper	46	chromHMM_state4_TssFlnkD	46.9871	1.52841	1490	42	43	53	53	46	11914	58259	711996	chromHMM_state4_TssFlnkD Brain_Anterior_Caudate human	Brain_Anterior_Caudate	NA	human	BRAIN	PrimaryTissue	4_TssFlnkD_E068.bed	9.09203e-48	21867
hyper	48	chromHMM_state4_TssFlnkD	46.8054	1.5751	1304	43	38	62	62	47.7	10111	58445	713799	chromHMM_state4_TssFlnkD Brain_Hippocampus_Middle human	Brain_Hippocampus_Middle	NA	human	BRAIN	PrimaryTissue	4_TssFlnkD_E071.bed	1.3494e-47	21256
hyper	30	chromHMM_state4_TssFlnkD	46.1402	1.48687	1661	44	56	45	56	48.3	13659	58088	710251	chromHMM_state4_TssFlnkD CD4+_CD25int_CD127+_Tmem_Primary_Cells human	CD4+_CD25int_CD127+_Tmem_Primary_Cells	NA	human	BLOOD	PrimaryCell	4_TssFlnkD_E045.bed	6.10039e-47	15931
hyper	52	chromHMM_state4_TssFlnkD	46.0398	1.47996	1695	45	58	44	58	49	14005	58054	709905	chromHMM_state4_TssFlnkD Colonic_Mucosa human	Colonic_Mucosa	NA	human	GI_COLON	PrimaryTissue	4_TssFlnkD_E075.bed	7.51651e-47	13602
hyper	83	chromHMM_state4_TssFlnkD	45.9059	1.52632	1463	46	44	54	54	48	11712	58286	712198	chromHMM_state4_TssFlnkD A549_EtOH_0.02pct_Lung_Carcinoma human	A549_EtOH_0.02pct_Lung_Carcinoma	NA	human	LUNG	CellLine	4_TssFlnkD_E114.bed	1.00075e-46	26207
hyper	15	chromHMM_state4_TssFlnkD	43.4547	1.51006	1450	47	50	55	55	50.7	11730	58299	712180	chromHMM_state4_TssFlnkD iPS-20b_Cell_Line human	iPS-20b_Cell_Line	NA	human	IPSC	PrimaryCulture	4_TssFlnkD_E020.bed	2.76854e-44	32733
hyper	51	chromHMM_state4_TssFlnkD	41.5774	1.52342	1330	48	45	60	60	51	10659	58419	713251	chromHMM_state4_TssFlnkD Brain_Substantia_Nigra human	Brain_Substantia_Nigra	NA	human	BRAIN	PrimaryTissue	4_TssFlnkD_E074.bed	2.04339e-42	18979
hyper	23	chromHMM_state4_TssFlnkD	40.5903	1.36198	2353	49	67	21	67	45.7	21153	57396	702757	chromHMM_state4_TssFlnkD CD4_Naive_Primary_Cells human	CD4_Naive_Primary_Cells	NA	human	BLOOD	PrimaryCell	4_TssFlnkD_E038.bed	1.94304e-41	32050
hyper	95	chromHMM_state4_TssFlnkD	39.3674	1.50007	1348	50	53	59	59	54	10970	58401	712940	chromHMM_state4_TssFlnkD NHDF-Ad_Adult_Dermal_Fibroblasts human	NHDF-Ad_Adult_Dermal_Fibroblasts	NA	human	SKIN	PrimaryCulture	4_TssFlnkD_E126.bed	3.18126e-40	22983
hyper	1	chromHMM_state4_TssFlnkD	38.3963	1.5806	1045	51	36	80	80	55.7	8062	58704	715848	chromHMM_state4_TssFlnkD H1_Cell_Line human	H1_Cell_Line	NA	human	ESC	PrimaryCulture	4_TssFlnkD_E003.bed	2.91847e-39	10873
hyper	67	chromHMM_state4_TssFlnkD	37.7208	1.60318	969	52	32	86	86	56.7	7368	58780	716542	chromHMM_state4_TssFlnkD Lung human	Lung	NA	human	LUNG	PrimaryTissue	4_TssFlnkD_E096.bed	1.35586e-38	7370
hyper	7	chromHMM_state4_TssFlnkD	37.6764	1.50365	1273	53	52	68	68	57.7	10331	58476	713579	chromHMM_state4_TssFlnkD hESC_Derived_CD184+_Endoderm_Cultured_Cells human	hESC_Derived_CD184+_Endoderm_Cultured_Cells	NA	human	ESC_DERIVED	ESCDerived	4_TssFlnkD_E011.bed	1.4735e-38	31035
hyper	6	chromHMM_state4_TssFlnkD	37.5103	1.86031	583	54	15	92	92	53.7	3814	59166	720096	chromHMM_state4_TssFlnkD H9_Cell_Line human	H9_Cell_Line	NA	human	ESC	PrimaryCulture	4_TssFlnkD_E008.bed	2.11992e-38	7507
hyper	89	chromHMM_state4_TssFlnkD	36.0966	1.42734	1579	55	60	49	60	54.7	13510	58170	710400	chromHMM_state4_TssFlnkD HSMM_Skeletal_Muscle_Myoblasts human	HSMM_Skeletal_Muscle_Myoblasts	NA	human	MUSCLE	PrimaryCulture	4_TssFlnkD_E120.bed	5.39537e-37	16835
hyper	12	chromHMM_state4_TssFlnkD	35.8862	1.57964	976	56	37	85	85	59.3	7531	58773	716379	chromHMM_state4_TssFlnkD HUES64_Cell_Line human	HUES64_Cell_Line	NA	human	ESC	PrimaryCulture	4_TssFlnkD_E016.bed	8.60144e-37	14703
hyper	10	chromHMM_state4_TssFlnkD	35.6386	1.57217	988	57	39	84	84	60	7660	58761	716250	chromHMM_state4_TssFlnkD HUES48_Cell_Line human	HUES48_Cell_Line	NA	human	ESC	PrimaryCulture	4_TssFlnkD_E014.bed	1.49447e-36	17839
hyper	50	chromHMM_state4_TssFlnkD	33.2824	1.48395	1189	58	57	72	72	62.3	9771	58560	714139	chromHMM_state4_TssFlnkD Brain_Mid_Frontal_Lobe human	Brain_Mid_Frontal_Lobe	NA	human	BRAIN	PrimaryTissue	4_TssFlnkD_E073.bed	3.33565e-34	16394
hyper	18	chromHMM_state4_TssFlnkD	30.5588	1.35288	1814	59	68	40	68	55.7	16375	57935	707535	chromHMM_state4_TssFlnkD Bone_Marrow_Derived_Mesenchymal_Stem_Cell_Cultured_Cell	Bone_Marrow_Derived_Mesenchymal_Stem_Cell_Cultured_Cells	NA	human	STROMAL_CONNECTIVE	PrimaryCulture	4_TssFlnkD_E026.bed	1.73501e-31	24413
hyper	54	chromHMM_state4_TssFlnkD	30.4078	1.42571	1325	60	61	61	61	60.7	11335	58424	712575	chromHMM_state4_TssFlnkD Duodenum_Smooth_Muscle human	Duodenum_Smooth_Muscle	NA	human	GI_DUODENUM	PrimaryTissue	4_TssFlnkD_E078.bed	2.41572e-31	17897
hyper	82	chromHMM_state4_TssFlnkD	30.0937	1.49414	1035	61	55	81	81	65.7	8441	58714	715469	chromHMM_state4_TssFlnkD Spleen human	Spleen	NA	human	SPLEEN	PrimaryTissue	4_TssFlnkD_E113.bed	4.89755e-31	12694
hyper	8	chromHMM_state4_TssFlnkD	29.7564	1.53306	910	62	42	88	88	64	7230	58839	716680	chromHMM_state4_TssFlnkD hESC_Derived_CD56+_Ectoderm_Cultured_Cells human	hESC_Derived_CD56+_Ectoderm_Cultured_Cells	NA	human	ESC_DERIVED	ESCDerived	4_TssFlnkD_E012.bed	1.04764e-30	11312
hyper	28	chromHMM_state4_TssFlnkD	29.1545	1.21911	4015	63	79	5	79	49	40390	55734	683520	chromHMM_state4_TssFlnkD CD4+_CD25-_Th_Primary_Cells human	CD4+_CD25-_Th_Primary_Cells	NA	human	BLOOD	PrimaryCell	4_TssFlnkD_E043.bed	4.12239e-30	29181
hyper	93	chromHMM_state4_TssFlnkD	28.9124	1.31228	2105	64	70	31	70	55	19599	57644	704311	chromHMM_state4_TssFlnkD Monocytes-CD14+_RO01746 human	Monocytes-CD14+_RO01746	NA	human	BLOOD	PrimaryCell	4_TssFlnkD_E124.bed	7.08563e-30	31284
hyper	45	chromHMM_state4_TssFlnkD	27.0384	1.4156	1216	65	62	71	71	66	10470	58533	713440	chromHMM_state4_TssFlnkD Brain_Angular_Gyrus human	Brain_Angular_Gyrus	NA	human	BRAIN	PrimaryTissue	4_TssFlnkD_E067.bed	5.22058e-28	17991
hyper	86	chromHMM_state4_TssFlnkD	26.0191	1.34533	1584	66	69	48	69	61	14363	58165	709547	chromHMM_state4_TssFlnkD HeLa-S3_Cervical_Carcinoma human	HeLa-S3_Cervical_Carcinoma	NA	human	CERVIX	CellLine	4_TssFlnkD_E117.bed	5.37434e-27	25698
hyper	29	chromHMM_state4_TssFlnkD	24.9189	1.29296	2003	67	73	34	73	58	18913	57746	704997	chromHMM_state4_TssFlnkD CD4+_CD25+_CD127-_Treg_Primary_Cells human	CD4+_CD25+_CD127-_Treg_Primary_Cells	NA	human	BLOOD	PrimaryCell	4_TssFlnkD_E044.bed	6.66862e-26	19164
hyper	53	chromHMM_state4_TssFlnkD	24.7478	1.37636	1301	68	65	63	68	65.3	11521	58448	712389	chromHMM_state4_TssFlnkD Colon_Smooth_Muscle human	Colon_Smooth_Muscle	NA	human	GI_COLON	PrimaryTissue	4_TssFlnkD_E076.bed	9.74387e-26	22607
hyper	22	chromHMM_state4_TssFlnkD	21.1917	1.39154	1033	69	63	82	82	71.3	9038	58716	714872	chromHMM_state4_TssFlnkD CD4_Memory_Primary_Cells human	CD4_Memory_Primary_Cells	NA	human	BLOOD	PrimaryCell	4_TssFlnkD_E037.bed	3.45463e-22	14889
hyper	33	chromHMM_state4_TssFlnkD	20.507	1.30687	1498	70	71	52	71	64.3	13970	58251	709940	chromHMM_state4_TssFlnkD CD8_Memory_Primary_Cells human	CD8_Memory_Primary_Cells	NA	human	BLOOD	PrimaryCell	4_TssFlnkD_E048.bed	1.64771e-21	26000
hyper	73	chromHMM_state4_TssFlnkD	18.0549	1.26182	1718	71	74	42	74	62.3	16595	58031	707315	chromHMM_state4_TssFlnkD Rectal_Mucosa.Donor_31 human	Rectal_Mucosa.Donor_31	NA	human	GI_RECTUM	PrimaryTissue	4_TssFlnkD_E102.bed	4.60047e-19	20825
hyper	85	chromHMM_state4_TssFlnkD	17.1851	1.20933	2431	72	80	20	80	57.3	24528	57318	699382	chromHMM_state4_TssFlnkD GM12878_Lymphoblastoid human	GM12878_Lymphoblastoid	NA	human	BLOOD	PrimaryCulture	4_TssFlnkD_E116.bed	3.36183e-18	43149
hyper	81	chromHMM_state4_TssFlnkD	16.245	1.29537	1242	73	72	69	73	71.3	11672	58507	712238	chromHMM_state4_TssFlnkD Thymus human	Thymus	NA	human	THYMUS	PrimaryTissue	4_TssFlnkD_E112.bed	2.88823e-17	14584
hyper	57	chromHMM_state4_TssFlnkD	15.7533	1.38124	784	74	64	90	90	76	6902	58965	717008	chromHMM_state4_TssFlnkD Fetal_Intestine_Large human	Fetal_Intestine_Large	NA	human	GI_INTESTINE	PrimaryTissue	4_TssFlnkD_E084.bed	8.84134e-17	9286
hyper	58	chromHMM_state4_TssFlnkD	14.9194	1.36659	788	75	66	89	89	76.7	7011	58961	716899	chromHMM_state4_TssFlnkD Fetal_Intestine_Small human	Fetal_Intestine_Small	NA	human	GI_INTESTINE	PrimaryTissue	4_TssFlnkD_E085.bed	5.94965e-16	9612
hyper	62	chromHMM_state4_TssFlnkD	14.0337	1.22434	1713	76	78	43	78	65.7	17041	58036	706869	chromHMM_state4_TssFlnkD Fetal_Placenta human	Fetal_Placenta	NA	human	PLACENTA	PrimaryTissue	4_TssFlnkD_E091.bed	4.51285e-15	12151
hyper	78	chromHMM_state4_TssFlnkD	13.9974	1.19564	2190	77	82	26	82	61.7	22326	57559	701584	chromHMM_state4_TssFlnkD Skeletal_Muscle_Female human	Skeletal_Muscle_Female	NA	human	MUSCLE	PrimaryTissue	4_TssFlnkD_E108.bed	4.84315e-15	27097
hyper	43	chromHMM_state4_TssFlnkD	12.803	1.73907	230	78	23	95	95	65.3	1605	59519	722305	chromHMM_state4_TssFlnkD Aorta human	Aorta	NA	human	VASCULAR	PrimaryTissue	4_TssFlnkD_E065.bed	7.48048e-14	3324
hyper	72	chromHMM_state4_TssFlnkD	12.1948	1.23146	1386	79	77	58	79	71.3	13696	58363	710214	chromHMM_state4_TssFlnkD Rectal_Mucosa.Donor_29 human	Rectal_Mucosa.Donor_29	NA	human	GI_RECTUM	PrimaryTissue	4_TssFlnkD_E101.bed	2.99643e-13	20350
hyper	90	chromHMM_state4_TssFlnkD	9.5803	1.2324	1050	80	76	79	80	78.3	10357	58699	713553	chromHMM_state4_TssFlnkD HSMMtube_Skeletal_Muscle_Myotubes_Derived_from_HSMM hum	HSMMtube_Skeletal_Muscle_Myotubes_Derived_from_HSMM	NA	human	MUSCLE	PrimaryCulture	4_TssFlnkD_E121.bed	1.21788e-10	15718
hyper	56	chromHMM_state4_TssFlnkD	9.53487	1.20703	1283	81	81	66	81	76	12926	58466	710984	chromHMM_state4_TssFlnkD Fetal_Adrenal_Gland human	Fetal_Adrenal_Gland	NA	human	ADRENAL	PrimaryTissue	4_TssFlnkD_E080.bed	1.33552e-10	12611
hyper	44	chromHMM_state4_TssFlnkD	8.56156	1.15588	1908	82	85	37	85	68	20086	57841	703824	chromHMM_state4_TssFlnkD Adult_Liver human	Adult_Liver	NA	human	LIVER	PrimaryTissue	4_TssFlnkD_E066.bed	1.24057e-09	21233
hyper	20	chromHMM_state4_TssFlnkD	7.98601	1.14729	1957	83	87	35	87	68.3	20754	57792	703156	chromHMM_state4_TssFlnkD CD19_Primary_Cells_Peripheral_UW human	CD19_Primary_Cells_Peripheral_UW	NA	human	BLOOD	PrimaryCell	4_TssFlnkD_E032.bed	4.61227e-09	15419
hyper	60	chromHMM_state4_TssFlnkD	7.71321	1.17015	1437	84	83	56	84	74.3	14931	58312	708979	chromHMM_state4_TssFlnkD Fetal_Muscle_Trunk human	Fetal_Muscle_Trunk	NA	human	MUSCLE	PrimaryTissue	4_TssFlnkD_E089.bed	8.54096e-09	11322
hyper	74	chromHMM_state4_TssFlnkD	5.22704	1.15331	1098	85	86	77	86	82.7	11563	58651	712347	chromHMM_state4_TssFlnkD Rectal_Smooth_Muscle human	Rectal_Smooth_Muscle	NA	human	GI_RECTUM	PrimaryTissue	4_TssFlnkD_E103.bed	2.58546e-06	18610
hyper	31	chromHMM_state4_TssFlnkD	5.14122	1.13916	1288	86	88	65	88	79.7	13735	58461	710175	chromHMM_state4_TssFlnkD CD56_Primary_Cells human	CD56_Primary_Cells	NA	human	BLOOD	PrimaryCell	4_TssFlnkD_E046.bed	3.11375e-06	9742
hyper	61	chromHMM_state4_TssFlnkD	3.59173	1.13043	928	87	89	87	89	87.7	9964	58821	713946	chromHMM_state4_TssFlnkD Fetal_Muscle_Leg human	Fetal_Muscle_Leg	NA	human	MUSCLE_LEG	PrimaryTissue	4_TssFlnkD_E090.bed	0.000109081	10031
hyper	77	chromHMM_state4_TssFlnkD	3.25173	1.24857	257	88	75	94	94	85.7	2496	59492	721414	chromHMM_state4_TssFlnkD Sigmoid_Colon human	Sigmoid_Colon	NA	human	GI_COLON	PrimaryTissue	4_TssFlnkD_E106.bed	0.000235934	4721
hyper	2	chromHMM_state4_TssFlnkD	1.60727	1.16274	200	89	84	97	97	90	2085	59549	721825	chromHMM_state4_TssFlnkD H1_BMP4_Derived_Mesendoderm_Cultured_Cells human	H1_BMP4_Derived_Mesendoderm_Cultured_Cells	NA	human	ESC_DERIVED	ESCDerived	4_TssFlnkD_E004.bed	0.0102881	4961
hyper	25	chromHMM_state4_TssFlnkD	0.662119	1.02503	1141	90	90	74	90	84.7	13493	58608	710417	chromHMM_state4_TssFlnkD CD4+_CD25-_CD45RO+_Memory_Primary_Cells human	CD4+_CD25-_CD45RO+_Memory_Primary_Cells	NA	human	BLOOD	PrimaryCell	4_TssFlnkD_E040.bed	0.0896683	19936
hyper	19	chromHMM_state4_TssFlnkD	0.404137	1.00725	1646	91	91	46	91	76	19803	58103	704107	chromHMM_state4_TssFlnkD CD14_Primary_Cells human	CD14_Primary_Cells	NA	human	BLOOD	PrimaryCell	4_TssFlnkD_E029.bed	0.160628	17619
hyper	63	chromHMM_state4_TssFlnkD	0.299386	1.00088	342	92	92	93	93	92.3	4140	59407	719770	chromHMM_state4_TssFlnkD Fetal_Stomach human	Fetal_Stomach	NA	human	GI_STOMACH	PrimaryTissue	4_TssFlnkD_E092.bed	0.202221	7139
hyper	21	chromHMM_state4_TssFlnkD	0.234612	0.993764	1092	93	93	78	93	88	13312	58657	710598	chromHMM_state4_TssFlnkD CD3_Primary_Cells_Peripheral_UW human	CD3_Primary_Cells_Peripheral_UW	NA	human	BLOOD	PrimaryCell	4_TssFlnkD_E034.bed	0.232223	11163
hyper	79	chromHMM_state4_TssFlnkD	0.147287	0.937298	67	94	95	98	98	95.7	866	59682	723044	chromHMM_state4_TssFlnkD Small_Intestine human	Small_Intestine	NA	human	GI_INTESTINE	PrimaryTissue	4_TssFlnkD_E109.bed	0.280922	2016
hyper	64	chromHMM_state4_TssFlnkD	0.0896742	0.97318	1144	95	94	73	95	87.3	14235	58605	709675	chromHMM_state4_TssFlnkD Fetal_Thymus human	Fetal_Thymus	NA	human	THYMUS	PrimaryTissue	4_TssFlnkD_E093.bed	0.317397	12009
hyper	84	chromHMM_state4_TssFlnkD	0.000993686	0.921649	1290	96	96	64	96	85.3	16927	58459	706983	chromHMM_state4_TssFlnkD Dnd41_TCell_Leukemia human	Dnd41_TCell_Leukemia	NA	human	BLOOD	CellLine	4_TssFlnkD_E115.bed	0.378246	20217
hyper	59	chromHMM_state4_TssFlnkD	4.56846e-10	0.679433	225	97	97	96	97	96.7	4005	59524	719905	chromHMM_state4_TssFlnkD Pancreatic_Islets human	Pancreatic_Islets	NA	human	PANCREAS	PrimaryTissue	4_TssFlnkD_E087.bed	0.378246	13539
hyper	41	chromHMM_state4_TssFlnkD	0	0.606547	1605	98	98	47	98	81	31511	58144	692399	chromHMM_state4_TssFlnkD Peripheral_Blood_Mononuclear_Primary_Cells human	Peripheral_Blood_Mononuclear_Primary_Cells	NA	human	BLOOD	PrimaryCell	4_TssFlnkD_E062.bed	0.378246	19765
hyper	75	chromHMM_state5_Tx	3.49765	1.35287	157	1	1	97	97	33	1407	59592	722503	chromHMM_state5_Tx Right_Atrium human	Right_Atrium	NA	human	HEART	PrimaryTissue	5_Tx_E104.bed	0.0311583	1143
hyper	2	chromHMM_state5_Tx	3.41133e-09	0.166357	5	2	98	98	98	66	364	59744	723546	chromHMM_state5_Tx H1_BMP4_Derived_Mesendoderm_Cultured_Cells human	H1_BMP4_Derived_Mesendoderm_Cultured_Cells	NA	human	ESC_DERIVED	ESCDerived	5_Tx_E004.bed	1	811
hyper	41	chromHMM_state5_Tx	0	0.481188	3061	3	5	3	5	3.67	73039	56688	650871	chromHMM_state5_Tx Peripheral_Blood_Mononuclear_Primary_Cells human	Peripheral_Blood_Mononuclear_Primary_Cells	NA	human	BLOOD	PrimaryCell	5_Tx_E062.bed	1	38590
hyper	13	chromHMM_state5_Tx	0	0.469884	2853	3	8	4	8	5	69804	56896	654106	chromHMM_state5_Tx IMR90_Cell_Line human	IMR90_Cell_Line	NA	human	LUNG	CellLine	5_Tx_E017.bed	1	43061
hyper	58	chromHMM_state5_Tx	0	0.462494	3447	3	11	1	11	5	84627	56302	639283	chromHMM_state5_Tx Fetal_Intestine_Small human	Fetal_Intestine_Small	NA	human	GI_INTESTINE	PrimaryTissue	5_Tx_E085.bed	1	51251
hyper	29	chromHMM_state5_Tx	0	0.46198	2432	3	12	10	12	8.33	60895	57317	663015	chromHMM_state5_Tx CD4+_CD25+_CD127-_Treg_Primary_Cells human	CD4+_CD25+_CD127-_Treg_Primary_Cells	NA	human	BLOOD	PrimaryCell	5_Tx_E044.bed	1	29171
hyper	84	chromHMM_state5_Tx	0	0.449148	2757	3	17	6	17	8.67	70387	56992	653523	chromHMM_state5_Tx Dnd41_TCell_Leukemia human	Dnd41_TCell_Leukemia	NA	human	BLOOD	CellLine	5_Tx_E115.bed	1	33386
hyper	38	chromHMM_state5_Tx	0	0.439379	2837	3	23	5	23	10.3	73761	56912	650149	chromHMM_state5_Tx Penis_Foreskin_Keratinocyte_Primary_Cells_skin03 human	Penis_Foreskin_Keratinocyte_Primary_Cells_skin03	NA	human	SKIN	PrimaryCulture	5_Tx_E058.bed	1	42513
hyper	34	chromHMM_state5_Tx	0	0.440921	2443	3	20	9	20	10.7	63821	57306	660089	chromHMM_state5_Tx Chondrocytes_from_Bone_Marrow_Derived_Mesenchymal_Stem_Cell_C	Chondrocytes_from_Bone_Marrow_Derived_Mesenchymal_Stem_Cell_Cultured_Cells	NA	human	STROMAL_CONNECTIVE	PrimaryCulture	5_Tx_E049.bed	1	36793
hyper	67	chromHMM_state5_Tx	0	0.467397	2201	3	9	21	21	11	54756	57548	669154	chromHMM_state5_Tx Lung human	Lung	NA	human	LUNG	PrimaryTissue	5_Tx_E096.bed	1	35989
hyper	65	chromHMM_state5_Tx	0	0.49246	2070	3	2	30	30	11.7	49172	57679	674738	chromHMM_state5_Tx Gastric human	Gastric	NA	human	GI_STOMACH	PrimaryTissue	5_Tx_E094.bed	1	28842
hyper	63	chromHMM_state5_Tx	0	0.423299	3230	3	31	2	31	12	86108	56519	637802	chromHMM_state5_Tx Fetal_Stomach human	Fetal_Stomach	NA	human	GI_STOMACH	PrimaryTissue	5_Tx_E092.bed	1	51571
hyper	4	chromHMM_state5_Tx	0	0.492097	2067	3	3	31	31	12.3	49137	57682	674773	chromHMM_state5_Tx H1_Derived_Mesenchymal_Stem_Cells human	H1_Derived_Mesenchymal_Stem_Cells	NA	human	ESC_DERIVED	ESCDerived	5_Tx_E006.bed	1	39345
hyper	80	chromHMM_state5_Tx	0	0.440325	2386	3	22	12	22	12.3	62481	57363	661429	chromHMM_state5_Tx Stomach_Smooth_Muscle human	Stomach_Smooth_Muscle	NA	human	GI_STOMACH	PrimaryTissue	5_Tx_E111.bed	1	38505
hyper	40	chromHMM_state5_Tx	0	0.428453	2390	3	28	11	28	14	64161	57359	659749	chromHMM_state5_Tx Penis_Foreskin_Melanocyte_Primary_Cells_skin03 human	Penis_Foreskin_Melanocyte_Primary_Cells_skin03	NA	human	SKIN	PrimaryCulture	5_Tx_E061.bed	1	42992
hyper	28	chromHMM_state5_Tx	0	0.432829	2258	3	25	17	25	15	60224	57491	663686	chromHMM_state5_Tx CD4+_CD25-_Th_Primary_Cells human	CD4+_CD25-_Th_Primary_Cells	NA	human	BLOOD	PrimaryCell	5_Tx_E043.bed	1	29476
hyper	81	chromHMM_state5_Tx	0	0.426441	2372	3	29	13	29	15	63976	57377	659934	chromHMM_state5_Tx Thymus human	Thymus	NA	human	THYMUS	PrimaryTissue	5_Tx_E112.bed	1	34867
hyper	43	chromHMM_state5_Tx	0	0.484591	1858	3	4	40	40	15.7	44967	57891	678943	chromHMM_state5_Tx Aorta human	Aorta	NA	human	VASCULAR	PrimaryTissue	5_Tx_E065.bed	1	32309
hyper	27	chromHMM_state5_Tx	0	0.45199	1924	3	15	36	36	18	49636	57825	674274	chromHMM_state5_Tx CD4+_CD25-_IL17+_PMA-Ionomcyin_stimulated_Th17_Primary_Cells	CD4+_CD25-_IL17+_PMA-Ionomcyin_stimulated_Th17_Primary_Cells	NA	human	BLOOD	PrimaryCell	5_Tx_E042.bed	1	27015
hyper	82	chromHMM_state5_Tx	0	0.454093	1904	3	14	37	37	18	48927	57845	674983	chromHMM_state5_Tx Spleen human	Spleen	NA	human	SPLEEN	PrimaryTissue	5_Tx_E113.bed	1	30984
hyper	97	chromHMM_state5_Tx	0	0.445776	1975	3	19	33	33	18.3	51560	57774	672350	chromHMM_state5_Tx NHLF_Lung_Fibroblasts human	NHLF_Lung_Fibroblasts	NA	human	LUNG	PrimaryCulture	5_Tx_E128.bed	1	29189
hyper	44	chromHMM_state5_Tx	0	0.409677	2267	3	38	16	38	19	63569	57482	660341	chromHMM_state5_Tx Adult_Liver human	Adult_Liver	NA	human	LIVER	PrimaryTissue	5_Tx_E066.bed	1	35978
hyper	55	chromHMM_state5_Tx	0	0.47439	1751	3	7	47	47	19	43314	57998	680596	chromHMM_state5_Tx Esophagus human	Esophagus	NA	human	GI_ESOPHAGUS	PrimaryTissue	5_Tx_E079.bed	1	27264
hyper	24	chromHMM_state5_Tx	0	0.434322	1982	3	24	32	32	19.7	53000	57767	670910	chromHMM_state5_Tx CD4+_CD25-_CD45RA+_Naive_Primary_Cells human	CD4+_CD25-_CD45RA+_Naive_Primary_Cells	NA	human	BLOOD	PrimaryCell	5_Tx_E039.bed	1	28469
hyper	69	chromHMM_state5_Tx	0	0.467044	1762	3	10	46	46	19.7	44221	57987	679689	chromHMM_state5_Tx Pancreas human	Pancreas	NA	human	PANCREAS	PrimaryTissue	5_Tx_E098.bed	1	28389
hyper	77	chromHMM_state5_Tx	0	0.422491	2166	3	33	23	33	19.7	59182	57583	664728	chromHMM_state5_Tx Sigmoid_Colon human	Sigmoid_Colon	NA	human	GI_COLON	PrimaryTissue	5_Tx_E106.bed	1	36545
hyper	96	chromHMM_state5_Tx	0	0.446277	1888	3	18	38	38	19.7	49323	57861	674587	chromHMM_state5_Tx NHEK-Epidermal_Keratinocytes human	NHEK-Epidermal_Keratinocytes	NA	human	SKIN	PrimaryCulture	5_Tx_E127.bed	1	33126
hyper	21	chromHMM_state5_Tx	0	0.424571	2118	3	30	27	30	20	57670	57631	666240	chromHMM_state5_Tx CD3_Primary_Cells_Peripheral_UW human	CD3_Primary_Cells_Peripheral_UW	NA	human	BLOOD	PrimaryCell	5_Tx_E034.bed	1	32107
hyper	68	chromHMM_state5_Tx	0	0.43166	1963	3	26	34	34	21	52813	57786	671097	chromHMM_state5_Tx Ovary human	Ovary	NA	human	OVARY	PrimaryTissue	5_Tx_E097.bed	1	37030
hyper	36	chromHMM_state5_Tx	0	0.451639	1785	3	16	45	45	21.3	46209	57964	677701	chromHMM_state5_Tx Penis_Foreskin_Fibroblast_Primary_Cells_skin01 human	Penis_Foreskin_Fibroblast_Primary_Cells_skin01	NA	human	SKIN	PrimaryCulture	5_Tx_E055.bed	1	42491
hyper	18	chromHMM_state5_Tx	0	0.40782	2145	3	39	24	39	22	60568	57604	663342	chromHMM_state5_Tx Bone_Marrow_Derived_Mesenchymal_Stem_Cell_Cultured_Cells huma	Bone_Marrow_Derived_Mesenchymal_Stem_Cell_Cultured_Cells	NA	human	STROMAL_CONNECTIVE	PrimaryCulture	5_Tx_E026.bed	1	35591
hyper	42	chromHMM_state5_Tx	0	0.398932	2240	3	44	19	44	22	64393	57509	659517	chromHMM_state5_Tx Adipose_Nuclei human	Adipose_Nuclei	NA	human	FAT	PrimaryTissue	5_Tx_E063.bed	1	38954
hyper	3	chromHMM_state5_Tx	0	0.412401	2071	3	36	29	36	22.7	57980	57678	665930	chromHMM_state5_Tx H1_BMP4_Derived_Trophoblast_Cultured_Cells human	H1_BMP4_Derived_Trophoblast_Cultured_Cells	NA	human	ESC_DERIVED	ESCDerived	5_Tx_E005.bed	1	34550
hyper	30	chromHMM_state5_Tx	0	0.440376	1801	3	21	44	44	22.7	47722	57948	676188	chromHMM_state5_Tx CD4+_CD25int_CD127+_Tmem_Primary_Cells human	CD4+_CD25int_CD127+_Tmem_Primary_Cells	NA	human	BLOOD	PrimaryCell	5_Tx_E045.bed	1	27202
hyper	57	chromHMM_state5_Tx	0	0.377724	2494	3	58	7	58	22.7	74850	57255	649060	chromHMM_state5_Tx Fetal_Intestine_Large human	Fetal_Intestine_Large	NA	human	GI_INTESTINE	PrimaryTissue	5_Tx_E084.bed	1	40903
hyper	31	chromHMM_state5_Tx	0	0.396689	2135	3	46	25	46	24.7	61847	57614	662063	chromHMM_state5_Tx CD56_Primary_Cells human	CD56_Primary_Cells	NA	human	BLOOD	PrimaryCell	5_Tx_E046.bed	1	32093
hyper	93	chromHMM_state5_Tx	0	0.379618	2309	3	57	14	57	24.7	69316	57440	654594	chromHMM_state5_Tx Monocytes-CD14+_RO01746 human	Monocytes-CD14+_RO01746	NA	human	BLOOD	PrimaryCell	5_Tx_E124.bed	1	35881
hyper	20	chromHMM_state5_Tx	0	0.392465	2109	3	48	28	48	26.3	61734	57640	662176	chromHMM_state5_Tx CD19_Primary_Cells_Peripheral_UW human	CD19_Primary_Cells_Peripheral_UW	NA	human	BLOOD	PrimaryCell	5_Tx_E032.bed	1	33252
hyper	37	chromHMM_state5_Tx	0	0.460369	1433	3	13	66	66	27.3	36682	58316	687228	chromHMM_state5_Tx Penis_Foreskin_Fibroblast_Primary_Cells_skin02 human	Penis_Foreskin_Fibroblast_Primary_Cells_skin02	NA	human	SKIN	PrimaryCulture	5_Tx_E056.bed	1	35971
hyper	61	chromHMM_state5_Tx	0	0.37194	2303	3	65	15	65	27.7	70435	57446	653475	chromHMM_state5_Tx Fetal_Muscle_Leg human	Fetal_Muscle_Leg	NA	human	MUSCLE_LEG	PrimaryTissue	5_Tx_E090.bed	1	43979
hyper	39	chromHMM_state5_Tx	0	0.476211	1215	3	6	75	75	28	30236	58534	693674	chromHMM_state5_Tx Penis_Foreskin_Melanocyte_Primary_Cells_skin01 human	Penis_Foreskin_Melanocyte_Primary_Cells_skin01	NA	human	SKIN	PrimaryCulture	5_Tx_E059.bed	1	27635
hyper	72	chromHMM_state5_Tx	0	0.383657	2128	3	56	26	56	28.3	63565	57621	660345	chromHMM_state5_Tx Rectal_Mucosa.Donor_29 human	Rectal_Mucosa.Donor_29	NA	human	GI_RECTUM	PrimaryTissue	5_Tx_E101.bed	1	35850
hyper	9	chromHMM_state5_Tx	0	0.356264	2452	3	76	8	76	29	77631	57297	646279	chromHMM_state5_Tx hESC_Derived_CD56+_Mesoderm_Cultured_Cells human	hESC_Derived_CD56+_Mesoderm_Cultured_Cells	NA	human	ESC_DERIVED	ESCDerived	5_Tx_E013.bed	1	42561
hyper	87	chromHMM_state5_Tx	0	0.407576	1807	3	41	43	43	29	51454	57942	672456	chromHMM_state5_Tx HepG2_Hepatocellular_Carcinoma human	HepG2_Hepatocellular_Carcinoma	NA	human	LIVER	CellLine	5_Tx_E118.bed	1	32225
hyper	19	chromHMM_state5_Tx	0	0.368398	2248	3	68	18	68	29.7	69452	57501	654458	chromHMM_state5_Tx CD14_Primary_Cells human	CD14_Primary_Cells	NA	human	BLOOD	PrimaryCell	5_Tx_E029.bed	1	29597
hyper	56	chromHMM_state5_Tx	0	0.367252	2223	3	69	20	69	30.7	68920	57526	654990	chromHMM_state5_Tx Fetal_Adrenal_Gland human	Fetal_Adrenal_Gland	NA	human	ADRENAL	PrimaryTissue	5_Tx_E080.bed	1	42232
hyper	76	chromHMM_state5_Tx	0	0.430738	1480	3	27	62	62	30.7	40310	58269	683600	chromHMM_state5_Tx Right_Ventricle human	Right_Ventricle	NA	human	HEART	PrimaryTissue	5_Tx_E105.bed	1	25575
hyper	49	chromHMM_state5_Tx	0	0.41984	1609	3	34	57	57	31.3	44767	58140	679143	chromHMM_state5_Tx Brain_Inferior_Temporal_Lobe human	Brain_Inferior_Temporal_Lobe	NA	human	BRAIN	PrimaryTissue	5_Tx_E072.bed	1	31049
hyper	26	chromHMM_state5_Tx	0	0.407588	1670	3	40	52	52	31.7	47704	58079	676206	chromHMM_state5_Tx CD4+_CD25-_IL17-_PMA-Ionomycin_stimulated_MACS_purified_Th_Pr	CD4+_CD25-_IL17-_PMA-Ionomycin_stimulated_MACS_purified_Th_Primary_Cells	NA	human	BLOOD	PrimaryCell	5_Tx_E041.bed	1	29851
hyper	60	chromHMM_state5_Tx	0	0.36598	2181	3	72	22	72	32.3	67908	57568	656002	chromHMM_state5_Tx Fetal_Muscle_Trunk human	Fetal_Muscle_Trunk	NA	human	MUSCLE	PrimaryTissue	5_Tx_E089.bed	1	42385
hyper	47	chromHMM_state5_Tx	0	0.416069	1494	3	35	60	60	32.7	42030	58255	681880	chromHMM_state5_Tx Brain_Cingulate_Gyrus human	Brain_Cingulate_Gyrus	NA	human	BRAIN	PrimaryTissue	5_Tx_E069.bed	1	27977
hyper	98	chromHMM_state5_Tx	0	0.396176	1719	3	47	49	49	33	50362	58030	673548	chromHMM_state5_Tx Osteoblasts human	Osteoblasts	NA	human	BONE	PrimaryCulture	5_Tx_E129.bed	1	33419
hyper	85	chromHMM_state5_Tx	0	0.411136	1486	3	37	61	61	33.7	42285	58263	681625	chromHMM_state5_Tx GM12878_Lymphoblastoid human	GM12878_Lymphoblastoid	NA	human	BLOOD	PrimaryCulture	5_Tx_E116.bed	1	32272
hyper	54	chromHMM_state5_Tx	0	0.37469	1860	3	61	39	61	34.3	57174	57889	666736	chromHMM_state5_Tx Duodenum_Smooth_Muscle human	Duodenum_Smooth_Muscle	NA	human	GI_DUODENUM	PrimaryTissue	5_Tx_E078.bed	1	36178
hyper	50	chromHMM_state5_Tx	0	0.422705	1379	3	32	70	70	35	38318	58370	685592	chromHMM_state5_Tx Brain_Mid_Frontal_Lobe human	Brain_Mid_Frontal_Lobe	NA	human	BRAIN	PrimaryTissue	5_Tx_E073.bed	1	26711
hyper	78	chromHMM_state5_Tx	0	0.388731	1626	3	51	56	56	36.7	48599	58123	675311	chromHMM_state5_Tx Skeletal_Muscle_Female human	Skeletal_Muscle_Female	NA	human	MUSCLE	PrimaryTissue	5_Tx_E108.bed	1	32358
hyper	48	chromHMM_state5_Tx	0	0.391777	1508	3	49	59	59	37	44877	58241	679033	chromHMM_state5_Tx Brain_Hippocampus_Middle human	Brain_Hippocampus_Middle	NA	human	BRAIN	PrimaryTissue	5_Tx_E071.bed	1	31021
hyper	66	chromHMM_state5_Tx	0	0.386258	1642	3	54	54	54	37	49350	58107	674560	chromHMM_state5_Tx Left_Ventricle human	Left_Ventricle	NA	human	HEART	PrimaryTissue	5_Tx_E095.bed	1	39018
hyper	52	chromHMM_state5_Tx	0	0.398572	1439	3	45	65	65	37.7	42209	58310	681701	chromHMM_state5_Tx Colonic_Mucosa human	Colonic_Mucosa	NA	human	GI_COLON	PrimaryTissue	5_Tx_E075.bed	1	23159
hyper	90	chromHMM_state5_Tx	0	0.404669	1270	3	42	73	73	39.3	36871	58479	687039	chromHMM_state5_Tx HSMMtube_Skeletal_Muscle_Myotubes_Derived_from_HSMM human	HSMMtube_Skeletal_Muscle_Myotubes_Derived_from_HSMM	NA	human	MUSCLE	PrimaryCulture	5_Tx_E121.bed	1	30900
hyper	62	chromHMM_state5_Tx	0	0.350412	1854	3	77	41	77	40.3	60617	57895	663293	chromHMM_state5_Tx Fetal_Placenta human	Fetal_Placenta	NA	human	PLACENTA	PrimaryTissue	5_Tx_E091.bed	1	32423
hyper	73	chromHMM_state5_Tx	0	0.366259	1736	3	71	48	71	40.7	54678	58013	669232	chromHMM_state5_Tx Rectal_Mucosa.Donor_31 human	Rectal_Mucosa.Donor_31	NA	human	GI_RECTUM	PrimaryTissue	5_Tx_E102.bed	1	33476
hyper	35	chromHMM_state5_Tx	0	0.329018	1952	3	85	35	85	41	67391	57797	656519	chromHMM_state5_Tx Mobilized_CD34_Primary_Cells_Female human	Mobilized_CD34_Primary_Cells_Female	NA	human	BLOOD	PrimaryCell	5_Tx_E050.bed	1	33734
hyper	70	chromHMM_state5_Tx	0	0.387339	1420	3	52	68	68	41	42808	58329	681102	chromHMM_state5_Tx Placenta_Amnion human	Placenta_Amnion	NA	human	PLACENTA	PrimaryTissue	5_Tx_E099.bed	1	22889
hyper	46	chromHMM_state5_Tx	0	0.375739	1475	3	60	64	64	42.3	45688	58274	678222	chromHMM_state5_Tx Brain_Anterior_Caudate human	Brain_Anterior_Caudate	NA	human	BRAIN	PrimaryTissue	5_Tx_E068.bed	1	31475
hyper	83	chromHMM_state5_Tx	0	0.385054	1402	3	55	69	69	42.3	42521	58347	681389	chromHMM_state5_Tx A549_EtOH_0.02pct_Lung_Carcinoma human	A549_EtOH_0.02pct_Lung_Carcinoma	NA	human	LUNG	CellLine	5_Tx_E114.bed	1	32364
hyper	11	chromHMM_state5_Tx	0	0.32615	1831	3	89	42	89	44.7	63968	57918	659942	chromHMM_state5_Tx HUES6_Cell_Line human	HUES6_Cell_Line	NA	human	ESC	PrimaryCulture	5_Tx_E015.bed	1	31604
hyper	86	chromHMM_state5_Tx	0	0.386652	1021	3	53	80	80	45.3	31149	58728	692761	chromHMM_state5_Tx HeLa-S3_Cervical_Carcinoma human	HeLa-S3_Cervical_Carcinoma	NA	human	CERVIX	CellLine	5_Tx_E117.bed	1	26244
hyper	10	chromHMM_state5_Tx	0	0.329395	1699	3	84	50	84	45.7	59073	58050	664837	chromHMM_state5_Tx HUES48_Cell_Line human	HUES48_Cell_Line	NA	human	ESC	PrimaryCulture	5_Tx_E014.bed	1	29077
hyper	89	chromHMM_state5_Tx	0	0.373135	1350	3	62	72	72	45.7	42232	58399	681678	chromHMM_state5_Tx HSMM_Skeletal_Muscle_Myoblasts human	HSMM_Skeletal_Muscle_Myoblasts	NA	human	MUSCLE	PrimaryCulture	5_Tx_E120.bed	1	39892
hyper	17	chromHMM_state5_Tx	0	0.400811	487	3	43	92	92	46	14544	59262	709366	chromHMM_state5_Tx iPS_DF_19.11_Cell_Line human	iPS_DF_19.11_Cell_Line	NA	human	IPSC	PrimaryCulture	5_Tx_E022.bed	1	12142
hyper	23	chromHMM_state5_Tx	0	0.390993	865	3	50	85	85	46	26213	58884	697697	chromHMM_state5_Tx CD4_Naive_Primary_Cells human	CD4_Naive_Primary_Cells	NA	human	BLOOD	PrimaryCell	5_Tx_E038.bed	1	21744
hyper	88	chromHMM_state5_Tx	0	0.377383	1161	3	59	77	77	46.3	36116	58588	687794	chromHMM_state5_Tx HMEC_Mammary_Epithelial human	HMEC_Mammary_Epithelial	NA	human	BREAST	PrimaryCulture	5_Tx_E119.bed	1	27647
hyper	15	chromHMM_state5_Tx	0	0.332603	1593	3	82	58	82	47.7	55082	58156	668828	chromHMM_state5_Tx iPS-20b_Cell_Line human	iPS-20b_Cell_Line	NA	human	IPSC	PrimaryCulture	5_Tx_E020.bed	1	28645
hyper	74	chromHMM_state5_Tx	0	0.370171	1230	3	66	74	74	47.7	38896	58519	685014	chromHMM_state5_Tx Rectal_Smooth_Muscle human	Rectal_Smooth_Muscle	NA	human	GI_RECTUM	PrimaryTissue	5_Tx_E103.bed	1	25781
hyper	6	chromHMM_state5_Tx	0	0.364223	1425	3	74	67	74	48	45508	58324	678402	chromHMM_state5_Tx H9_Cell_Line human	H9_Cell_Line	NA	human	ESC	PrimaryCulture	5_Tx_E008.bed	1	24368
hyper	7	chromHMM_state5_Tx	0	0.328599	1630	3	86	55	86	48	56927	58119	666983	chromHMM_state5_Tx hESC_Derived_CD184+_Endoderm_Cultured_Cells human	hESC_Derived_CD184+_Endoderm_Cultured_Cells	NA	human	ESC_DERIVED	ESCDerived	5_Tx_E011.bed	1	39384
hyper	45	chromHMM_state5_Tx	0	0.373089	1100	3	63	78	78	48	34650	58649	689260	chromHMM_state5_Tx Brain_Angular_Gyrus human	Brain_Angular_Gyrus	NA	human	BRAIN	PrimaryTissue	5_Tx_E067.bed	1	26115
hyper	64	chromHMM_state5_Tx	0	0.308087	1678	3	93	51	93	49	62074	58071	661836	chromHMM_state5_Tx Fetal_Thymus human	Fetal_Thymus	NA	human	THYMUS	PrimaryTissue	5_Tx_E093.bed	1	32039
hyper	12	chromHMM_state5_Tx	0	0.315345	1647	3	92	53	92	49.3	59706	58102	664204	chromHMM_state5_Tx HUES64_Cell_Line human	HUES64_Cell_Line	NA	human	ESC	PrimaryCulture	5_Tx_E016.bed	1	29806
hyper	53	chromHMM_state5_Tx	0	0.364548	1173	3	73	76	76	50.7	37695	58576	686215	chromHMM_state5_Tx Colon_Smooth_Muscle human	Colon_Smooth_Muscle	NA	human	GI_COLON	PrimaryTissue	5_Tx_E076.bed	1	25773
hyper	1	chromHMM_state5_Tx	0	0.327808	1480	3	88	62	88	51	52057	58269	671853	chromHMM_state5_Tx H1_Cell_Line human	H1_Cell_Line	NA	human	ESC	PrimaryCulture	5_Tx_E003.bed	1	26496
hyper	33	chromHMM_state5_Tx	0	0.372292	591	3	64	90	90	52.3	18918	59158	704992	chromHMM_state5_Tx CD8_Memory_Primary_Cells human	CD8_Memory_Primary_Cells	NA	human	BLOOD	PrimaryCell	5_Tx_E048.bed	1	18115
hyper	51	chromHMM_state5_Tx	0	0.362749	1091	3	75	79	79	52.3	35307	58658	688603	chromHMM_state5_Tx Brain_Substantia_Nigra human	Brain_Substantia_Nigra	NA	human	BRAIN	PrimaryTissue	5_Tx_E074.bed	1	24868
hyper	32	chromHMM_state5_Tx	0	0.369566	630	3	67	89	89	53	20289	59119	703621	chromHMM_state5_Tx CD8_Naive_Primary_Cells human	CD8_Naive_Primary_Cells	NA	human	BLOOD	PrimaryCell	5_Tx_E047.bed	1	19308
hyper	14	chromHMM_state5_Tx	0	0.31962	1375	3	90	71	90	54.7	49688	58374	674222	chromHMM_state5_Tx iPS-18_Cell_Line human	iPS-18_Cell_Line	NA	human	IPSC	PrimaryCulture	5_Tx_E019.bed	1	26835
hyper	16	chromHMM_state5_Tx	0	0.343639	881	3	80	82	82	55	30211	58868	693699	chromHMM_state5_Tx iPS_DF_6.9_Cell_Line human	iPS_DF_6.9_Cell_Line	NA	human	IPSC	PrimaryCulture	5_Tx_E021.bed	1	16977
hyper	95	chromHMM_state5_Tx	0	0.344044	878	3	79	83	83	55	30077	58871	693833	chromHMM_state5_Tx NHDF-Ad_Adult_Dermal_Fibroblasts human	NHDF-Ad_Adult_Dermal_Fibroblasts	NA	human	SKIN	PrimaryCulture	5_Tx_E126.bed	1	29254
hyper	25	chromHMM_state5_Tx	0	0.366313	444	3	70	93	93	55.3	14499	59305	709411	chromHMM_state5_Tx CD4+_CD25-_CD45RO+_Memory_Primary_Cells human	CD4+_CD25-_CD45RO+_Memory_Primary_Cells	NA	human	BLOOD	PrimaryCell	5_Tx_E040.bed	1	17948
hyper	22	chromHMM_state5_Tx	0	0.345408	562	3	78	91	91	57.3	19368	59187	704542	chromHMM_state5_Tx CD4_Memory_Primary_Cells human	CD4_Memory_Primary_Cells	NA	human	BLOOD	PrimaryCell	5_Tx_E037.bed	1	17500
hyper	5	chromHMM_state5_Tx	0	0.328302	758	3	87	87	87	59	27266	58991	696644	chromHMM_state5_Tx H1_Derived_Neuronal_Progenitor_Cultured_Cells human	H1_Derived_Neuronal_Progenitor_Cultured_Cells	NA	human	ESC_DERIVED	ESCDerived	5_Tx_E007.bed	1	17536
hyper	94	chromHMM_state5_Tx	0	0.315372	868	3	91	84	91	59.3	32327	58881	691583	chromHMM_state5_Tx NH-A_Astrocytes human	NH-A_Astrocytes	NA	human	BRAIN	PrimaryCulture	5_Tx_E125.bed	1	27533
hyper	59	chromHMM_state5_Tx	0	0.341763	288	3	81	95	95	59.7	10116	59461	713794	chromHMM_state5_Tx Pancreatic_Islets human	Pancreatic_Islets	NA	human	PANCREAS	PrimaryTissue	5_Tx_E087.bed	1	9261
hyper	8	chromHMM_state5_Tx	0	0.287665	887	3	96	81	96	60	36034	58862	687876	chromHMM_state5_Tx hESC_Derived_CD56+_Ectoderm_Cultured_Cells human	hESC_Derived_CD56+_Ectoderm_Cultured_Cells	NA	human	ESC_DERIVED	ESCDerived	5_Tx_E012.bed	1	24546
hyper	79	chromHMM_state5_Tx	0	0.330409	398	3	83	94	94	60	14400	59351	709510	chromHMM_state5_Tx Small_Intestine human	Small_Intestine	NA	human	GI_INTESTINE	PrimaryTissue	5_Tx_E109.bed	1	13229
hyper	91	chromHMM_state5_Tx	0	0.296557	814	3	94	86	94	61	32215	58935	691695	chromHMM_state5_Tx HUVEC_Umbilical_Vein_Endothelial_Cells human	HUVEC_Umbilical_Vein_Endothelial_Cells	NA	human	VASCULAR	PrimaryCulture	5_Tx_E122.bed	1	25862
hyper	92	chromHMM_state5_Tx	0	0.262507	720	3	97	88	97	62.7	32143	59029	691767	chromHMM_state5_Tx K562_Leukemia human	K562_Leukemia	NA	human	BLOOD	PrimaryCulture	5_Tx_E123.bed	1	28036
hyper	71	chromHMM_state5_Tx	0	0.295185	277	3	95	96	96	64.7	11245	59472	712665	chromHMM_state5_Tx Psoas_Muscle human	Psoas_Muscle	NA	human	MUSCLE	PrimaryTissue	5_Tx_E100.bed	1	14040
hyper	84	chromHMM_state6_TxWk	0.18726	0.994273	5145	1	1	58	58	20	62664	54604	661246	chromHMM_state6_TxWk Dnd41_TCell_Leukemia human	Dnd41_TCell_Leukemia	NA	human	BLOOD	CellLine	6_TxWk_E115.bed	1	58522
hyper	69	chromHMM_state6_TxWk	3.72309e-05	0.961904	12773	2	2	2	2	2	159531	46976	564379	chromHMM_state6_TxWk Pancreas human	Pancreas	NA	human	PANCREAS	PrimaryTissue	6_TxWk_E098.bed	1	115589
hyper	75	chromHMM_state6_TxWk	4.94027e-10	0.940881	13181	3	3	1	3	2.33	167413	46568	556497	chromHMM_state6_TxWk Right_Atrium human	Right_Atrium	NA	human	HEART	PrimaryTissue	6_TxWk_E104.bed	1	93950
hyper	65	chromHMM_state6_TxWk	8.19678e-15	0.924091	12312	4	4	3	4	3.67	158737	47437	565173	chromHMM_state6_TxWk Gastric human	Gastric	NA	human	GI_STOMACH	PrimaryTissue	6_TxWk_E094.bed	1	99809
hyper	86	chromHMM_state6_TxWk	0	0.863158	7631	5	6	13	13	8	104988	52118	618922	chromHMM_state6_TxWk HeLa-S3_Cervical_Carcinoma human	HeLa-S3_Cervical_Carcinoma	NA	human	CERVIX	CellLine	6_TxWk_E117.bed	1	68623
hyper	83	chromHMM_state6_TxWk	0	0.873834	7419	5	5	16	16	8.67	101054	52330	622856	chromHMM_state6_TxWk A549_EtOH_0.02pct_Lung_Carcinoma human	A549_EtOH_0.02pct_Lung_Carcinoma	NA	human	LUNG	CellLine	6_TxWk_E114.bed	1	86518
hyper	90	chromHMM_state6_TxWk	0	0.756468	8123	5	17	10	17	10.7	124646	51626	599264	chromHMM_state6_TxWk HSMMtube_Skeletal_Muscle_Myotubes_Derived_from_HSMM human	HSMMtube_Skeletal_Muscle_Myotubes_Derived_from_HSMM	NA	human	MUSCLE	PrimaryCulture	6_TxWk_E121.bed	1	96806
hyper	82	chromHMM_state6_TxWk	0	0.741131	8470	5	22	8	22	11.7	131934	51279	591976	chromHMM_state6_TxWk Spleen human	Spleen	NA	human	SPLEEN	PrimaryTissue	6_TxWk_E113.bed	1	105322
hyper	43	chromHMM_state6_TxWk	0	0.705141	8804	5	30	7	30	14	142494	50945	581416	chromHMM_state6_TxWk Aorta human	Aorta	NA	human	VASCULAR	PrimaryTissue	6_TxWk_E065.bed	1	98422
hyper	89	chromHMM_state6_TxWk	0	0.743448	7124	5	20	20	20	15	111511	52625	612399	chromHMM_state6_TxWk HSMM_Skeletal_Muscle_Myoblasts human	HSMM_Skeletal_Muscle_Myoblasts	NA	human	MUSCLE	PrimaryCulture	6_TxWk_E120.bed	1	94370
hyper	55	chromHMM_state6_TxWk	0	0.702033	8216	5	32	9	32	15.3	133976	51533	589934	chromHMM_state6_TxWk Esophagus human	Esophagus	NA	human	GI_ESOPHAGUS	PrimaryTissue	6_TxWk_E079.bed	1	97164
hyper	18	chromHMM_state6_TxWk	0	0.778375	6188	5	11	33	33	16.3	93561	53561	630349	chromHMM_state6_TxWk Bone_Marrow_Derived_Mesenchymal_Stem_Cell_Cultured_Cells hu	Bone_Marrow_Derived_Mesenchymal_Stem_Cell_Cultured_Cells	NA	human	STROMAL_CONNECTIVE	PrimaryCulture	6_TxWk_E026.bed	1	95414
hyper	45	chromHMM_state6_TxWk	0	0.70606	7203	5	29	19	29	17.7	117696	52546	606214	chromHMM_state6_TxWk Brain_Angular_Gyrus human	Brain_Angular_Gyrus	NA	human	BRAIN	PrimaryTissue	6_TxWk_E067.bed	1	94382
hyper	44	chromHMM_state6_TxWk	0	0.808692	5844	5	7	42	42	18	85575	53905	638335	chromHMM_state6_TxWk Adult_Liver human	Adult_Liver	NA	human	LIVER	PrimaryTissue	6_TxWk_E066.bed	1	88004
hyper	67	chromHMM_state6_TxWk	0	0.699402	7422	5	34	15	34	18	122057	52327	601853	chromHMM_state6_TxWk Lung human	Lung	NA	human	LUNG	PrimaryTissue	6_TxWk_E096.bed	1	116735
hyper	88	chromHMM_state6_TxWk	0	0.742259	6557	5	21	28	28	18	103101	53192	620809	chromHMM_state6_TxWk HMEC_Mammary_Epithelial human	HMEC_Mammary_Epithelial	NA	human	BREAST	PrimaryCulture	6_TxWk_E119.bed	1	86032
hyper	68	chromHMM_state6_TxWk	0	0.689466	7805	5	39	12	39	18.7	129536	51944	594374	chromHMM_state6_TxWk Ovary human	Ovary	NA	human	OVARY	PrimaryTissue	6_TxWk_E097.bed	1	111140
hyper	16	chromHMM_state6_TxWk	0	0.671451	9695	5	48	4	48	19	162076	50054	561834	chromHMM_state6_TxWk iPS_DF_6.9_Cell_Line human	iPS_DF_6.9_Cell_Line	NA	human	IPSC	PrimaryCulture	6_TxWk_E021.bed	1	86412
hyper	5	chromHMM_state6_TxWk	0	0.67096	9378	5	49	6	49	20	157244	50371	566666	chromHMM_state6_TxWk H1_Derived_Neuronal_Progenitor_Cultured_Cells human	H1_Derived_Neuronal_Progenitor_Cultured_Cells	NA	human	ESC_DERIVED	ESCDerived	6_TxWk_E007.bed	1	90628
hyper	76	chromHMM_state6_TxWk	0	0.684432	7479	5	41	14	41	20	125171	52270	598739	chromHMM_state6_TxWk Right_Ventricle human	Right_Ventricle	NA	human	HEART	PrimaryTissue	6_TxWk_E105.bed	1	96424
hyper	6	chromHMM_state6_TxWk	0	0.673544	8055	5	45	11	45	20.3	136010	51694	587900	chromHMM_state6_TxWk H9_Cell_Line human	H9_Cell_Line	NA	human	ESC	PrimaryCulture	6_TxWk_E008.bed	1	96954
hyper	17	chromHMM_state6_TxWk	0	0.664164	9410	5	52	5	52	20.7	159002	50339	564908	chromHMM_state6_TxWk iPS_DF_19.11_Cell_Line human	iPS_DF_19.11_Cell_Line	NA	human	IPSC	PrimaryCulture	6_TxWk_E022.bed	1	130691
hyper	34	chromHMM_state6_TxWk	0	0.770568	5789	5	14	43	43	20.7	88470	53960	635440	chromHMM_state6_TxWk Chondrocytes_from_Bone_Marrow_Derived_Mesenchymal_Stem_Cell	Chondrocytes_from_Bone_Marrow_Derived_Mesenchymal_Stem_Cell_Cultured_Cells	NA	human	STROMAL_CONNECTIVE	PrimaryCulture	6_TxWk_E049.bed	1	103397
hyper	49	chromHMM_state6_TxWk	0	0.704877	6578	5	31	27	31	21	108085	53171	615825	chromHMM_state6_TxWk Brain_Inferior_Temporal_Lobe human	Brain_Inferior_Temporal_Lobe	NA	human	BRAIN	PrimaryTissue	6_TxWk_E072.bed	1	99175
hyper	46	chromHMM_state6_TxWk	0	0.695727	6673	5	36	25	36	22	110797	53076	613113	chromHMM_state6_TxWk Brain_Anterior_Caudate human	Brain_Anterior_Caudate	NA	human	BRAIN	PrimaryTissue	6_TxWk_E068.bed	1	103506
hyper	87	chromHMM_state6_TxWk	0	0.770067	5710	5	15	46	46	22	87346	54039	636564	chromHMM_state6_TxWk HepG2_Hepatocellular_Carcinoma human	HepG2_Hepatocellular_Carcinoma	NA	human	LIVER	CellLine	6_TxWk_E118.bed	1	87168
hyper	30	chromHMM_state6_TxWk	0	0.785681	5435	5	10	54	54	23	81783	54314	642127	chromHMM_state6_TxWk CD4+_CD25int_CD127+_Tmem_Primary_Cells human	CD4+_CD25int_CD127+_Tmem_Primary_Cells	NA	human	BLOOD	PrimaryCell	6_TxWk_E045.bed	1	55124
hyper	40	chromHMM_state6_TxWk	0	0.74106	5896	5	23	41	41	23	93183	53853	630727	chromHMM_state6_TxWk Penis_Foreskin_Melanocyte_Primary_Cells_skin03 human	Penis_Foreskin_Melanocyte_Primary_Cells_skin03	NA	human	SKIN	PrimaryCulture	6_TxWk_E061.bed	1	108437
hyper	70	chromHMM_state6_TxWk	0	0.67166	7270	5	47	17	47	23	123780	52479	600130	chromHMM_state6_TxWk Placenta_Amnion human	Placenta_Amnion	NA	human	PLACENTA	PrimaryTissue	6_TxWk_E099.bed	1	76617
hyper	92	chromHMM_state6_TxWk	0	0.710481	5962	5	27	37	37	23	97698	53787	626212	chromHMM_state6_TxWk K562_Leukemia human	K562_Leukemia	NA	human	BLOOD	PrimaryCulture	6_TxWk_E123.bed	1	83376
hyper	39	chromHMM_state6_TxWk	0	0.675868	6743	5	43	23	43	23.7	114672	53006	609238	chromHMM_state6_TxWk Penis_Foreskin_Melanocyte_Primary_Cells_skin01 human	Penis_Foreskin_Melanocyte_Primary_Cells_skin01	NA	human	SKIN	PrimaryCulture	6_TxWk_E059.bed	1	97731
hyper	41	chromHMM_state6_TxWk	0	0.749902	5536	5	19	50	50	24.7	86762	54213	637148	chromHMM_state6_TxWk Peripheral_Blood_Mononuclear_Primary_Cells human	Peripheral_Blood_Mononuclear_Primary_Cells	NA	human	BLOOD	PrimaryCell	6_TxWk_E062.bed	1	69865
hyper	47	chromHMM_state6_TxWk	0	0.688407	6395	5	40	31	40	25.3	107351	53354	616559	chromHMM_state6_TxWk Brain_Cingulate_Gyrus human	Brain_Cingulate_Gyrus	NA	human	BRAIN	PrimaryTissue	6_TxWk_E069.bed	1	92635
hyper	50	chromHMM_state6_TxWk	0	0.673391	6647	5	46	26	46	25.7	113473	53102	610437	chromHMM_state6_TxWk Brain_Mid_Frontal_Lobe human	Brain_Mid_Frontal_Lobe	NA	human	BRAIN	PrimaryTissue	6_TxWk_E073.bed	1	89255
hyper	51	chromHMM_state6_TxWk	0	0.676472	6424	5	42	30	42	25.7	109430	53325	614480	chromHMM_state6_TxWk Brain_Substantia_Nigra human	Brain_Substantia_Nigra	NA	human	BRAIN	PrimaryTissue	6_TxWk_E074.bed	1	90192
hyper	98	chromHMM_state6_TxWk	0	0.723439	5491	5	25	53	53	27.7	88840	54258	635070	chromHMM_state6_TxWk Osteoblasts human	Osteoblasts	NA	human	BONE	PrimaryCulture	6_TxWk_E129.bed	1	92432
hyper	96	chromHMM_state6_TxWk	0	0.699749	5656	5	33	48	48	28.7	94109	54093	629801	chromHMM_state6_TxWk NHEK-Epidermal_Keratinocytes human	NHEK-Epidermal_Keratinocytes	NA	human	SKIN	PrimaryCulture	6_TxWk_E127.bed	1	87457
hyper	4	chromHMM_state6_TxWk	0	0.635607	7223	5	64	18	64	29	128762	52526	595148	chromHMM_state6_TxWk H1_Derived_Mesenchymal_Stem_Cells human	H1_Derived_Mesenchymal_Stem_Cells	NA	human	ESC_DERIVED	ESCDerived	6_TxWk_E006.bed	1	126344
hyper	23	chromHMM_state6_TxWk	0	0.72116	5287	5	26	56	56	29	85886	54462	638024	chromHMM_state6_TxWk CD4_Naive_Primary_Cells human	CD4_Naive_Primary_Cells	NA	human	BLOOD	PrimaryCell	6_TxWk_E038.bed	1	58613
hyper	85	chromHMM_state6_TxWk	0	0.7632	4883	5	16	68	68	29.7	75601	54866	648309	chromHMM_state6_TxWk GM12878_Lymphoblastoid human	GM12878_Lymphoblastoid	NA	human	BLOOD	PrimaryCulture	6_TxWk_E116.bed	1	78707
hyper	27	chromHMM_state6_TxWk	0	0.775682	4660	5	12	75	75	30.7	71182	55089	652728	chromHMM_state6_TxWk CD4+_CD25-_IL17+_PMA-Ionomcyin_stimulated_Th17_Primary_Cell	CD4+_CD25-_IL17+_PMA-Ionomcyin_stimulated_Th17_Primary_Cells	NA	human	BLOOD	PrimaryCell	6_TxWk_E042.bed	1	59595
hyper	97	chromHMM_state6_TxWk	0	0.697547	5493	5	35	52	52	30.7	91752	54256	632158	chromHMM_state6_TxWk NHLF_Lung_Fibroblasts human	NHLF_Lung_Fibroblasts	NA	human	LUNG	PrimaryCulture	6_TxWk_E128.bed	1	80741
hyper	66	chromHMM_state6_TxWk	0	0.633344	6684	5	65	24	65	31.3	120089	53065	603821	chromHMM_state6_TxWk Left_Ventricle human	Left_Ventricle	NA	human	HEART	PrimaryTissue	6_TxWk_E095.bed	1	124451
hyper	73	chromHMM_state6_TxWk	0	0.669944	5897	5	50	40	50	31.7	101702	53852	622208	chromHMM_state6_TxWk Rectal_Mucosa.Donor_31 human	Rectal_Mucosa.Donor_31	NA	human	GI_RECTUM	PrimaryTissue	6_TxWk_E102.bed	1	83135
hyper	95	chromHMM_state6_TxWk	0	0.662507	6000	5	54	36	54	31.7	104388	53749	619522	chromHMM_state6_TxWk NHDF-Ad_Adult_Dermal_Fibroblasts human	NHDF-Ad_Adult_Dermal_Fibroblasts	NA	human	SKIN	PrimaryCulture	6_TxWk_E126.bed	1	95146
hyper	3	chromHMM_state6_TxWk	0	0.624891	6805	5	69	22	69	32	123499	52944	600411	chromHMM_state6_TxWk H1_BMP4_Derived_Trophoblast_Cultured_Cells human	H1_BMP4_Derived_Trophoblast_Cultured_Cells	NA	human	ESC_DERIVED	ESCDerived	6_TxWk_E005.bed	1	122427
hyper	28	chromHMM_state6_TxWk	0	0.80536	4303	5	9	82	82	32	63627	55446	660283	chromHMM_state6_TxWk CD4+_CD25-_Th_Primary_Cells human	CD4+_CD25-_Th_Primary_Cells	NA	human	BLOOD	PrimaryCell	6_TxWk_E043.bed	1	60258
hyper	29	chromHMM_state6_TxWk	0	0.807258	4294	5	8	83	83	32	63360	55455	660550	chromHMM_state6_TxWk CD4+_CD25+_CD127-_Treg_Primary_Cells human	CD4+_CD25+_CD127-_Treg_Primary_Cells	NA	human	BLOOD	PrimaryCell	6_TxWk_E044.bed	1	54778
hyper	38	chromHMM_state6_TxWk	0	0.725298	4928	5	24	67	67	32	79827	54821	644083	chromHMM_state6_TxWk Penis_Foreskin_Keratinocyte_Primary_Cells_skin03 human	Penis_Foreskin_Keratinocyte_Primary_Cells_skin03	NA	human	SKIN	PrimaryCulture	6_TxWk_E058.bed	1	99847
hyper	77	chromHMM_state6_TxWk	0	0.644865	6199	5	60	32	60	32.3	110174	53550	613736	chromHMM_state6_TxWk Sigmoid_Colon human	Sigmoid_Colon	NA	human	GI_COLON	PrimaryTissue	6_TxWk_E106.bed	1	101494
hyper	72	chromHMM_state6_TxWk	0	0.674099	5540	5	44	49	49	32.7	95301	54209	628609	chromHMM_state6_TxWk Rectal_Mucosa.Donor_29 human	Rectal_Mucosa.Donor_29	NA	human	GI_RECTUM	PrimaryTissue	6_TxWk_E101.bed	1	78086
hyper	7	chromHMM_state6_TxWk	0	0.632371	6447	5	67	29	67	33.7	116231	53302	607679	chromHMM_state6_TxWk hESC_Derived_CD184+_Endoderm_Cultured_Cells human	hESC_Derived_CD184+_Endoderm_Cultured_Cells	NA	human	ESC_DERIVED	ESCDerived	6_TxWk_E011.bed	1	126386
hyper	24	chromHMM_state6_TxWk	0	0.750687	4477	5	18	79	79	34	70503	55272	653407	chromHMM_state6_TxWk CD4+_CD25-_CD45RA+_Naive_Primary_Cells human	CD4+_CD25-_CD45RA+_Naive_Primary_Cells	NA	human	BLOOD	PrimaryCell	6_TxWk_E039.bed	1	63437
hyper	26	chromHMM_state6_TxWk	0	0.7732	4268	5	13	85	85	34.3	65506	55481	658404	chromHMM_state6_TxWk CD4+_CD25-_IL17-_PMA-Ionomycin_stimulated_MACS_purified_Th_	CD4+_CD25-_IL17-_PMA-Ionomycin_stimulated_MACS_purified_Th_Primary_Cells	NA	human	BLOOD	PrimaryCell	6_TxWk_E041.bed	1	63904
hyper	22	chromHMM_state6_TxWk	0	0.694506	4979	5	37	65	65	35.7	83789	54770	640121	chromHMM_state6_TxWk CD4_Memory_Primary_Cells human	CD4_Memory_Primary_Cells	NA	human	BLOOD	PrimaryCell	6_TxWk_E037.bed	1	58271
hyper	53	chromHMM_state6_TxWk	0	0.633278	5909	5	66	39	66	36.7	106928	53840	616982	chromHMM_state6_TxWk Colon_Smooth_Muscle human	Colon_Smooth_Muscle	NA	human	GI_COLON	PrimaryTissue	6_TxWk_E076.bed	1	87212
hyper	71	chromHMM_state6_TxWk	0	0.576856	6815	5	84	21	84	36.7	132089	52934	591821	chromHMM_state6_TxWk Psoas_Muscle human	Psoas_Muscle	NA	human	MUSCLE	PrimaryTissue	6_TxWk_E100.bed	1	94673
hyper	33	chromHMM_state6_TxWk	0	0.66754	5381	5	51	55	55	37	93473	54368	630437	chromHMM_state6_TxWk CD8_Memory_Primary_Cells human	CD8_Memory_Primary_Cells	NA	human	BLOOD	PrimaryCell	6_TxWk_E048.bed	1	58391
hyper	52	chromHMM_state6_TxWk	0	0.636564	5753	5	63	44	63	37.3	103793	53996	620117	chromHMM_state6_TxWk Colonic_Mucosa human	Colonic_Mucosa	NA	human	GI_COLON	PrimaryTissue	6_TxWk_E075.bed	1	62340
hyper	54	chromHMM_state6_TxWk	0	0.637494	5750	5	62	45	62	37.3	103612	53999	620298	chromHMM_state6_TxWk Duodenum_Smooth_Muscle human	Duodenum_Smooth_Muscle	NA	human	GI_DUODENUM	PrimaryTissue	6_TxWk_E078.bed	1	93723
hyper	59	chromHMM_state6_TxWk	0	0.619029	5912	5	71	38	71	38	109071	53837	614839	chromHMM_state6_TxWk Pancreatic_Islets human	Pancreatic_Islets	NA	human	PANCREAS	PrimaryTissue	6_TxWk_E087.bed	1	68683
hyper	9	chromHMM_state6_TxWk	0	0.652487	5184	5	57	57	57	39.7	92009	54565	631901	chromHMM_state6_TxWk hESC_Derived_CD56+_Mesoderm_Cultured_Cells human	hESC_Derived_CD56+_Mesoderm_Cultured_Cells	NA	human	ESC_DERIVED	ESCDerived	6_TxWk_E013.bed	1	101548
hyper	78	chromHMM_state6_TxWk	0	0.663092	5042	5	53	62	62	40	88339	54707	635571	chromHMM_state6_TxWk Skeletal_Muscle_Female human	Skeletal_Muscle_Female	NA	human	MUSCLE	PrimaryTissue	6_TxWk_E108.bed	1	95055
hyper	21	chromHMM_state6_TxWk	0	0.707552	3544	5	28	91	91	41.3	59234	56205	664676	chromHMM_state6_TxWk CD3_Primary_Cells_Peripheral_UW human	CD3_Primary_Cells_Peripheral_UW	NA	human	BLOOD	PrimaryCell	6_TxWk_E034.bed	1	61054
hyper	48	chromHMM_state6_TxWk	0	0.631608	5530	5	68	51	68	41.3	100647	54219	623263	chromHMM_state6_TxWk Brain_Hippocampus_Middle human	Brain_Hippocampus_Middle	NA	human	BRAIN	PrimaryTissue	6_TxWk_E071.bed	1	98635
hyper	74	chromHMM_state6_TxWk	0	0.597284	5671	5	75	47	75	42.3	108118	54078	615792	chromHMM_state6_TxWk Rectal_Smooth_Muscle human	Rectal_Smooth_Muscle	NA	human	GI_RECTUM	PrimaryTissue	6_TxWk_E103.bed	1	74555
hyper	8	chromHMM_state6_TxWk	0	0.55934	6005	5	90	34	90	43	120533	53744	603377	chromHMM_state6_TxWk hESC_Derived_CD56+_Ectoderm_Cultured_Cells human	hESC_Derived_CD56+_Ectoderm_Cultured_Cells	NA	human	ESC_DERIVED	ESCDerived	6_TxWk_E012.bed	1	85648
hyper	31	chromHMM_state6_TxWk	0	0.694148	4170	5	38	86	86	43	70613	55579	653297	chromHMM_state6_TxWk CD56_Primary_Cells human	CD56_Primary_Cells	NA	human	BLOOD	PrimaryCell	6_TxWk_E046.bed	1	66156
hyper	32	chromHMM_state6_TxWk	0	0.660828	4873	5	55	69	69	43	85754	54876	638156	chromHMM_state6_TxWk CD8_Naive_Primary_Cells human	CD8_Naive_Primary_Cells	NA	human	BLOOD	PrimaryCell	6_TxWk_E047.bed	1	58972
hyper	80	chromHMM_state6_TxWk	0	0.64453	4985	5	61	64	64	43.3	89586	54764	634324	chromHMM_state6_TxWk Stomach_Smooth_Muscle human	Stomach_Smooth_Muscle	NA	human	GI_STOMACH	PrimaryTissue	6_TxWk_E111.bed	1	83476
hyper	79	chromHMM_state6_TxWk	0	0.541501	6004	5	92	35	92	44	123806	53745	600104	chromHMM_state6_TxWk Small_Intestine human	Small_Intestine	NA	human	GI_INTESTINE	PrimaryTissue	6_TxWk_E109.bed	1	78329
hyper	25	chromHMM_state6_TxWk	0	0.658641	4747	5	56	74	74	45	83869	55002	640041	chromHMM_state6_TxWk CD4+_CD25-_CD45RO+_Memory_Primary_Cells human	CD4+_CD25-_CD45RO+_Memory_Primary_Cells	NA	human	BLOOD	PrimaryCell	6_TxWk_E040.bed	1	53849
hyper	42	chromHMM_state6_TxWk	0	0.64525	4844	5	59	71	71	45	87075	54905	636835	chromHMM_state6_TxWk Adipose_Nuclei human	Adipose_Nuclei	NA	human	FAT	PrimaryTissue	6_TxWk_E063.bed	1	100961
hyper	11	chromHMM_state6_TxWk	0	0.588195	5064	5	79	61	79	48.3	98468	54685	625442	chromHMM_state6_TxWk HUES6_Cell_Line human	HUES6_Cell_Line	NA	human	ESC	PrimaryCulture	6_TxWk_E015.bed	1	111553
hyper	1	chromHMM_state6_TxWk	0	0.577096	5143	5	83	59	83	49	101569	54606	622341	chromHMM_state6_TxWk H1_Cell_Line human	H1_Cell_Line	NA	human	ESC	PrimaryCulture	6_TxWk_E003.bed	1	93310
hyper	94	chromHMM_state6_TxWk	0	0.583176	5102	5	82	60	82	49	99901	54647	624009	chromHMM_state6_TxWk NH-A_Astrocytes human	NH-A_Astrocytes	NA	human	BRAIN	PrimaryCulture	6_TxWk_E125.bed	1	80373
hyper	10	chromHMM_state6_TxWk	0	0.595044	4935	5	77	66	77	49.3	95136	54814	628774	chromHMM_state6_TxWk HUES48_Cell_Line human	HUES48_Cell_Line	NA	human	ESC	PrimaryCulture	6_TxWk_E014.bed	1	97570
hyper	20	chromHMM_state6_TxWk	0	0.652256	3853	5	58	88	88	50.3	69192	55896	654718	chromHMM_state6_TxWk CD19_Primary_Cells_Peripheral_UW human	CD19_Primary_Cells_Peripheral_UW	NA	human	BLOOD	PrimaryCell	6_TxWk_E032.bed	1	68188
hyper	12	chromHMM_state6_TxWk	0	0.588546	4851	5	78	70	78	51	94500	54898	629410	chromHMM_state6_TxWk HUES64_Cell_Line human	HUES64_Cell_Line	NA	human	ESC	PrimaryCulture	6_TxWk_E016.bed	1	97074
hyper	57	chromHMM_state6_TxWk	0	0.606833	4656	5	73	76	76	51.3	88493	55093	635417	chromHMM_state6_TxWk Fetal_Intestine_Large human	Fetal_Intestine_Large	NA	human	GI_INTESTINE	PrimaryTissue	6_TxWk_E084.bed	1	91220
hyper	81	chromHMM_state6_TxWk	0	0.611888	4637	5	72	77	77	51.3	87509	55112	636401	chromHMM_state6_TxWk Thymus human	Thymus	NA	human	THYMUS	PrimaryTissue	6_TxWk_E112.bed	1	73396
hyper	13	chromHMM_state6_TxWk	0	0.62454	4437	5	70	80	80	51.7	82398	55312	641512	chromHMM_state6_TxWk IMR90_Cell_Line human	IMR90_Cell_Line	NA	human	LUNG	CellLine	6_TxWk_E017.bed	1	116206
hyper	58	chromHMM_state6_TxWk	0	0.563974	4994	5	87	63	87	51.7	100775	54755	623135	chromHMM_state6_TxWk Fetal_Intestine_Small human	Fetal_Intestine_Small	NA	human	GI_INTESTINE	PrimaryTissue	6_TxWk_E085.bed	1	106855
hyper	15	chromHMM_state6_TxWk	0	0.586275	4756	5	80	73	80	52.7	93060	54993	630850	chromHMM_state6_TxWk iPS-20b_Cell_Line human	iPS-20b_Cell_Line	NA	human	IPSC	PrimaryCulture	6_TxWk_E020.bed	1	90374
hyper	62	chromHMM_state6_TxWk	0	0.599041	4325	5	74	81	81	53.3	83433	55424	640477	chromHMM_state6_TxWk Fetal_Placenta human	Fetal_Placenta	NA	human	PLACENTA	PrimaryTissue	6_TxWk_E091.bed	1	84974
hyper	14	chromHMM_state6_TxWk	0	0.560604	4808	5	88	72	88	55	97747	54941	626163	chromHMM_state6_TxWk iPS-18_Cell_Line human	iPS-18_Cell_Line	NA	human	IPSC	PrimaryCulture	6_TxWk_E019.bed	1	91367
hyper	91	chromHMM_state6_TxWk	0	0.566584	4493	5	86	78	86	56.3	90853	55256	633057	chromHMM_state6_TxWk HUVEC_Umbilical_Vein_Endothelial_Cells human	HUVEC_Umbilical_Vein_Endothelial_Cells	NA	human	VASCULAR	PrimaryCulture	6_TxWk_E122.bed	1	68609
hyper	37	chromHMM_state6_TxWk	0	0.570079	4288	5	85	84	85	58	86454	55461	637456	chromHMM_state6_TxWk Penis_Foreskin_Fibroblast_Primary_Cells_skin02 human	Penis_Foreskin_Fibroblast_Primary_Cells_skin02	NA	human	SKIN	PrimaryCulture	6_TxWk_E056.bed	1	97650
hyper	93	chromHMM_state6_TxWk	0	0.596627	2857	5	76	98	98	59.7	56201	56892	667709	chromHMM_state6_TxWk Monocytes-CD14+_RO01746 human	Monocytes-CD14+_RO01746	NA	human	BLOOD	PrimaryCell	6_TxWk_E124.bed	1	70666
hyper	19	chromHMM_state6_TxWk	0	0.585673	3185	5	81	96	96	60.7	63494	56564	660416	chromHMM_state6_TxWk CD14_Primary_Cells human	CD14_Primary_Cells	NA	human	BLOOD	PrimaryCell	6_TxWk_E029.bed	1	72129
hyper	35	chromHMM_state6_TxWk	0	0.560065	3584	5	89	89	89	61	74044	56165	649866	chromHMM_state6_TxWk Mobilized_CD34_Primary_Cells_Female human	Mobilized_CD34_Primary_Cells_Female	NA	human	BLOOD	PrimaryCell	6_TxWk_E050.bed	1	81984
hyper	2	chromHMM_state6_TxWk	0	0.534979	4106	5	93	87	93	61.7	87749	55643	636161	chromHMM_state6_TxWk H1_BMP4_Derived_Mesendoderm_Cultured_Cells human	H1_BMP4_Derived_Mesendoderm_Cultured_Cells	NA	human	ESC_DERIVED	ESCDerived	6_TxWk_E004.bed	1	71116
hyper	36	chromHMM_state6_TxWk	0	0.546355	3364	5	91	95	95	63.7	71268	56385	652642	chromHMM_state6_TxWk Penis_Foreskin_Fibroblast_Primary_Cells_skin01 human	Penis_Foreskin_Fibroblast_Primary_Cells_skin01	NA	human	SKIN	PrimaryCulture	6_TxWk_E055.bed	1	107075
hyper	61	chromHMM_state6_TxWk	0	0.503599	3578	5	96	90	96	63.7	81284	56171	642626	chromHMM_state6_TxWk Fetal_Muscle_Leg human	Fetal_Muscle_Leg	NA	human	MUSCLE_LEG	PrimaryTissue	6_TxWk_E090.bed	1	106755
hyper	64	chromHMM_state6_TxWk	0	0.525556	3427	5	94	93	94	64	75115	56322	648795	chromHMM_state6_TxWk Fetal_Thymus human	Fetal_Thymus	NA	human	THYMUS	PrimaryTissue	6_TxWk_E093.bed	1	74449
hyper	60	chromHMM_state6_TxWk	0	0.517804	3375	5	95	94	95	64.7	75024	56374	648886	chromHMM_state6_TxWk Fetal_Muscle_Trunk human	Fetal_Muscle_Trunk	NA	human	MUSCLE	PrimaryTissue	6_TxWk_E089.bed	1	84940
hyper	63	chromHMM_state6_TxWk	0	0.477851	3463	5	98	92	98	65	82575	56286	641335	chromHMM_state6_TxWk Fetal_Stomach human	Fetal_Stomach	NA	human	GI_STOMACH	PrimaryTissue	6_TxWk_E092.bed	1	99830
hyper	56	chromHMM_state6_TxWk	0	0.501358	2957	5	97	97	97	66.3	68107	56792	655803	chromHMM_state6_TxWk Fetal_Adrenal_Gland human	Fetal_Adrenal_Gland	NA	human	ADRENAL	PrimaryTissue	6_TxWk_E080.bed	1	95246
hyper	75	chromHMM_state7_EnhG1	32.3087	2.2857	301	1	1	66	66	22.7	1600	59448	722310	chromHMM_state7_EnhG1 Right_Atrium human	Right_Atrium	NA	human	HEART	PrimaryTissue	7_EnhG1_E104.bed	4.81416e-31	2021
hyper	58	chromHMM_state7_EnhG1	0.203249	0.990876	1271	2	2	8	8	4	15538	58478	708372	chromHMM_state7_EnhG1 Fetal_Intestine_Small human	Fetal_Intestine_Small	NA	human	GI_INTESTINE	PrimaryTissue	7_EnhG1_E085.bed	1	21782
hyper	2	chromHMM_state7_EnhG1	0.00301742	0.403812	5	3	95	98	98	65.3	150	59744	723760	chromHMM_state7_EnhG1 H1_BMP4_Derived_Mesendoderm_Cultured_Cells human	H1_BMP4_Derived_Mesendoderm_Cultured_Cells	NA	human	ESC_DERIVED	ESCDerived	7_EnhG1_E004.bed	1	554
hyper	5	chromHMM_state7_EnhG1	0.000569272	0.782159	146	4	7	88	88	33	2260	59603	721650	chromHMM_state7_EnhG1 H1_Derived_Neuronal_Progenitor_Cultured_Cells human	H1_Derived_Neuronal_Progenitor_Cultured_Cells	NA	human	ESC_DERIVED	ESCDerived	7_EnhG1_E007.bed	1	3635
hyper	8	chromHMM_state7_EnhG1	1.52132e-05	0.706323	123	5	20	90	90	38.3	2108	59626	721802	chromHMM_state7_EnhG1 hESC_Derived_CD56+_Ectoderm_Cultured_Cells human	hESC_Derived_CD56+_Ectoderm_Cultured_Cells	NA	human	ESC_DERIVED	ESCDerived	7_EnhG1_E012.bed	1	2826
hyper	70	chromHMM_state7_EnhG1	1.48611e-05	0.783407	262	6	6	70	70	27.3	4047	59487	719863	chromHMM_state7_EnhG1 Placenta_Amnion human	Placenta_Amnion	NA	human	PLACENTA	PrimaryTissue	7_EnhG1_E099.bed	1	4183
hyper	81	chromHMM_state7_EnhG1	5.37282e-07	0.824295	603	7	4	27	27	12.7	8844	59146	715066	chromHMM_state7_EnhG1 Thymus human	Thymus	NA	human	THYMUS	PrimaryTissue	7_EnhG1_E112.bed	1	11246
hyper	52	chromHMM_state7_EnhG1	1.0899e-07	0.769766	363	8	8	56	56	24	5703	59386	718207	chromHMM_state7_EnhG1 Colonic_Mucosa human	Colonic_Mucosa	NA	human	GI_COLON	PrimaryTissue	7_EnhG1_E075.bed	1	6211
hyper	63	chromHMM_state7_EnhG1	3.5839e-08	0.86174	1296	9	3	7	9	6.33	18158	58453	705752	chromHMM_state7_EnhG1 Fetal_Stomach human	Fetal_Stomach	NA	human	GI_STOMACH	PrimaryTissue	7_EnhG1_E092.bed	1	21953
hyper	6	chromHMM_state7_EnhG1	9.50999e-09	0.620007	118	10	47	91	91	49.3	2303	59631	721607	chromHMM_state7_EnhG1 H9_Cell_Line human	H9_Cell_Line	NA	human	ESC	PrimaryCulture	7_EnhG1_E008.bed	1	4697
hyper	59	chromHMM_state7_EnhG1	5.93327e-10	0.279736	14	11	98	97	98	68.7	606	59735	723304	chromHMM_state7_EnhG1 Pancreatic_Islets human	Pancreatic_Islets	NA	human	PANCREAS	PrimaryTissue	7_EnhG1_E087.bed	1	1140
hyper	57	chromHMM_state7_EnhG1	1.16271e-10	0.764904	530	12	10	33	33	18.3	8372	59219	715538	chromHMM_state7_EnhG1 Fetal_Intestine_Large human	Fetal_Intestine_Large	NA	human	GI_INTESTINE	PrimaryTissue	7_EnhG1_E084.bed	1	13087
hyper	41	chromHMM_state7_EnhG1	2.56735e-11	0.766529	581	13	9	28	28	16.7	9156	59168	714754	chromHMM_state7_EnhG1 Peripheral_Blood_Mononuclear_Primary_Cells human	Peripheral_Blood_Mononuclear_Primary_Cells	NA	human	BLOOD	PrimaryCell	7_EnhG1_E062.bed	1	13490
hyper	79	chromHMM_state7_EnhG1	2.42193e-11	0.4922	68	14	87	95	95	65.3	1672	59681	722238	chromHMM_state7_EnhG1 Small_Intestine human	Small_Intestine	NA	human	GI_INTESTINE	PrimaryTissue	7_EnhG1_E109.bed	1	2718
hyper	77	chromHMM_state7_EnhG1	6.9311e-13	0.749741	575	15	11	30	30	18.7	9262	59174	714648	chromHMM_state7_EnhG1 Sigmoid_Colon human	Sigmoid_Colon	NA	human	GI_COLON	PrimaryTissue	7_EnhG1_E106.bed	1	13787
hyper	73	chromHMM_state7_EnhG1	4.2305e-13	0.680991	316	16	30	64	64	36.7	5608	59433	718302	chromHMM_state7_EnhG1 Rectal_Mucosa.Donor_31 human	Rectal_Mucosa.Donor_31	NA	human	GI_RECTUM	PrimaryTissue	7_EnhG1_E102.bed	1	8554
hyper	43	chromHMM_state7_EnhG1	2.42287e-13	0.645311	243	17	39	73	73	43	4552	59506	719358	chromHMM_state7_EnhG1 Aorta human	Aorta	NA	human	VASCULAR	PrimaryTissue	7_EnhG1_E065.bed	1	8657
hyper	16	chromHMM_state7_EnhG1	1.51592e-13	0.542312	118	18	78	91	91	62.3	2632	59631	721278	chromHMM_state7_EnhG1 iPS_DF_6.9_Cell_Line human	iPS_DF_6.9_Cell_Line	NA	human	IPSC	PrimaryCulture	7_EnhG1_E021.bed	1	4267
hyper	3	chromHMM_state7_EnhG1	1.42817e-13	0.798587	1037	19	5	12	19	12	15664	58712	708246	chromHMM_state7_EnhG1 H1_BMP4_Derived_Trophoblast_Cultured_Cells human	H1_BMP4_Derived_Trophoblast_Cultured_Cells	NA	human	ESC_DERIVED	ESCDerived	7_EnhG1_E005.bed	1	20444
hyper	1	chromHMM_state7_EnhG1	2.10223e-14	0.613142	209	20	55	77	77	50.7	4121	59540	719789	chromHMM_state7_EnhG1 H1_Cell_Line human	H1_Cell_Line	NA	human	ESC	PrimaryCulture	7_EnhG1_E003.bed	1	5826
hyper	90	chromHMM_state7_EnhG1	4.05018e-15	0.613527	222	21	54	76	76	50.3	4374	59527	719536	chromHMM_state7_EnhG1 HSMMtube_Skeletal_Muscle_Myotubes_Derived_from_HSMM human	HSMMtube_Skeletal_Muscle_Myotubes_Derived_from_HSMM	NA	human	MUSCLE	PrimaryCulture	7_EnhG1_E121.bed	1	9418
hyper	35	chromHMM_state7_EnhG1	3.13406e-15	0.699928	444	22	24	49	49	31.7	7661	59305	716249	chromHMM_state7_EnhG1 Mobilized_CD34_Primary_Cells_Female human	Mobilized_CD34_Primary_Cells_Female	NA	human	BLOOD	PrimaryCell	7_EnhG1_E050.bed	1	11768
hyper	88	chromHMM_state7_EnhG1	2.89298e-16	0.650808	322	23	38	62	62	41	5977	59427	717933	chromHMM_state7_EnhG1 HMEC_Mammary_Epithelial human	HMEC_Mammary_Epithelial	NA	human	BREAST	PrimaryCulture	7_EnhG1_E119.bed	1	9152
hyper	72	chromHMM_state7_EnhG1	2.41082e-16	0.679736	407	24	31	51	51	35.3	7231	59342	716679	chromHMM_state7_EnhG1 Rectal_Mucosa.Donor_29 human	Rectal_Mucosa.Donor_29	NA	human	GI_RECTUM	PrimaryTissue	7_EnhG1_E101.bed	1	10263
hyper	12	chromHMM_state7_EnhG1	1.92865e-16	0.587947	204	25	64	78	78	55.7	4194	59545	719716	chromHMM_state7_EnhG1 HUES64_Cell_Line human	HUES64_Cell_Line	NA	human	ESC	PrimaryCulture	7_EnhG1_E016.bed	1	7894
hyper	97	chromHMM_state7_EnhG1	9.64327e-17	0.704221	514	26	22	35	35	27.7	8811	59235	715099	chromHMM_state7_EnhG1 NHLF_Lung_Fibroblasts human	NHLF_Lung_Fibroblasts	NA	human	LUNG	PrimaryCulture	7_EnhG1_E128.bed	1	12750
hyper	71	chromHMM_state7_EnhG1	9.64327e-17	0.402151	61	26	96	96	96	72.7	1835	59688	722075	chromHMM_state7_EnhG1 Psoas_Muscle human	Psoas_Muscle	NA	human	MUSCLE	PrimaryTissue	7_EnhG1_E100.bed	1	4540
hyper	10	chromHMM_state7_EnhG1	4.82164e-17	0.597824	227	28	61	75	75	54.7	4589	59522	719321	chromHMM_state7_EnhG1 HUES48_Cell_Line human	HUES48_Cell_Line	NA	human	ESC	PrimaryCulture	7_EnhG1_E014.bed	1	8191
hyper	4	chromHMM_state7_EnhG1	0	0.711347	1855	29	19	2	29	16.7	31202	57894	692708	chromHMM_state7_EnhG1 H1_Derived_Mesenchymal_Stem_Cells human	H1_Derived_Mesenchymal_Stem_Cells	NA	human	ESC_DERIVED	ESCDerived	7_EnhG1_E006.bed	1	33016
hyper	17	chromHMM_state7_EnhG1	0	0.706257	2047	29	21	1	29	17	34623	57702	689287	chromHMM_state7_EnhG1 iPS_DF_19.11_Cell_Line human	iPS_DF_19.11_Cell_Line	NA	human	IPSC	PrimaryCulture	7_EnhG1_E022.bed	1	25102
hyper	60	chromHMM_state7_EnhG1	0	0.711588	1342	29	18	6	29	17.7	22644	58407	701266	chromHMM_state7_EnhG1 Fetal_Muscle_Trunk human	Fetal_Muscle_Trunk	NA	human	MUSCLE	PrimaryTissue	7_EnhG1_E089.bed	1	18785
hyper	38	chromHMM_state7_EnhG1	0	0.73441	1031	29	13	13	29	18.3	16904	58718	707006	chromHMM_state7_EnhG1 Penis_Foreskin_Keratinocyte_Primary_Cells_skin03 human	Penis_Foreskin_Keratinocyte_Primary_Cells_skin03	NA	human	SKIN	PrimaryCulture	7_EnhG1_E058.bed	1	23225
hyper	13	chromHMM_state7_EnhG1	0	0.711723	1067	29	17	11	29	19	18034	58682	705876	chromHMM_state7_EnhG1 IMR90_Cell_Line human	IMR90_Cell_Line	NA	human	LUNG	CellLine	7_EnhG1_E017.bed	1	29078
hyper	62	chromHMM_state7_EnhG1	0	0.743951	819	29	12	17	29	19.3	13275	58930	710635	chromHMM_state7_EnhG1 Fetal_Placenta human	Fetal_Placenta	NA	human	PLACENTA	PrimaryTissue	7_EnhG1_E091.bed	1	13336
hyper	67	chromHMM_state7_EnhG1	0	0.71571	1011	29	15	14	29	19.3	17001	58738	706909	chromHMM_state7_EnhG1 Lung human	Lung	NA	human	LUNG	PrimaryTissue	7_EnhG1_E096.bed	1	21849
hyper	61	chromHMM_state7_EnhG1	0	0.704016	1176	29	23	10	29	20.7	20073	58573	703837	chromHMM_state7_EnhG1 Fetal_Muscle_Leg human	Fetal_Muscle_Leg	NA	human	MUSCLE_LEG	PrimaryTissue	7_EnhG1_E090.bed	1	22326
hyper	82	chromHMM_state7_EnhG1	0	0.681193	1204	29	29	9	29	22.3	21215	58545	702695	chromHMM_state7_EnhG1 Spleen human	Spleen	NA	human	SPLEEN	PrimaryTissue	7_EnhG1_E113.bed	1	19452
hyper	31	chromHMM_state7_EnhG1	0	0.718314	623	29	14	25	29	22.7	10465	59126	713445	chromHMM_state7_EnhG1 CD56_Primary_Cells human	CD56_Primary_Cells	NA	human	BLOOD	PrimaryCell	7_EnhG1_E046.bed	1	13485
hyper	64	chromHMM_state7_EnhG1	0	0.713793	682	29	16	23	29	22.7	11523	59067	712387	chromHMM_state7_EnhG1 Fetal_Thymus human	Fetal_Thymus	NA	human	THYMUS	PrimaryTissue	7_EnhG1_E093.bed	1	14255
hyper	56	chromHMM_state7_EnhG1	0	0.691687	858	29	25	16	29	23.3	14934	58891	708976	chromHMM_state7_EnhG1 Fetal_Adrenal_Gland human	Fetal_Adrenal_Gland	NA	human	ADRENAL	PrimaryTissue	7_EnhG1_E080.bed	1	22274
hyper	39	chromHMM_state7_EnhG1	0	0.651804	1487	29	37	5	37	23.7	27278	58262	696632	chromHMM_state7_EnhG1 Penis_Foreskin_Melanocyte_Primary_Cells_skin01 human	Penis_Foreskin_Melanocyte_Primary_Cells_skin01	NA	human	SKIN	PrimaryCulture	7_EnhG1_E059.bed	1	20828
hyper	9	chromHMM_state7_EnhG1	0	0.691249	784	29	26	18	29	24.3	13662	58965	710248	chromHMM_state7_EnhG1 hESC_Derived_CD56+_Mesoderm_Cultured_Cells human	hESC_Derived_CD56+_Mesoderm_Cultured_Cells	NA	human	ESC_DERIVED	ESCDerived	7_EnhG1_E013.bed	1	18206
hyper	37	chromHMM_state7_EnhG1	0	0.640115	1799	29	41	3	41	24.3	33484	57950	690426	chromHMM_state7_EnhG1 Penis_Foreskin_Fibroblast_Primary_Cells_skin02 human	Penis_Foreskin_Fibroblast_Primary_Cells_skin02	NA	human	SKIN	PrimaryCulture	7_EnhG1_E056.bed	1	30916
hyper	55	chromHMM_state7_EnhG1	0	0.681551	650	29	28	24	29	27	11497	59099	712413	chromHMM_state7_EnhG1 Esophagus human	Esophagus	NA	human	GI_ESOPHAGUS	PrimaryTissue	7_EnhG1_E079.bed	1	13803
hyper	80	chromHMM_state7_EnhG1	0	0.664756	749	29	33	19	33	27	13566	59000	710344	chromHMM_state7_EnhG1 Stomach_Smooth_Muscle human	Stomach_Smooth_Muscle	NA	human	GI_STOMACH	PrimaryTissue	7_EnhG1_E111.bed	1	15189
hyper	21	chromHMM_state7_EnhG1	0	0.668735	747	29	32	21	32	27.3	13451	59002	710459	chromHMM_state7_EnhG1 CD3_Primary_Cells_Peripheral_UW human	CD3_Primary_Cells_Peripheral_UW	NA	human	BLOOD	PrimaryCell	7_EnhG1_E034.bed	1	15428
hyper	76	chromHMM_state7_EnhG1	0	0.663359	748	29	34	20	34	27.7	13576	59001	710334	chromHMM_state7_EnhG1 Right_Ventricle human	Right_Ventricle	NA	human	HEART	PrimaryTissue	7_EnhG1_E105.bed	1	14168
hyper	20	chromHMM_state7_EnhG1	0	0.685004	581	29	27	28	29	28	10231	59168	713679	chromHMM_state7_EnhG1 CD19_Primary_Cells_Peripheral_UW human	CD19_Primary_Cells_Peripheral_UW	NA	human	BLOOD	PrimaryCell	7_EnhG1_E032.bed	1	13140
hyper	36	chromHMM_state7_EnhG1	0	0.612943	1593	29	56	4	56	29.7	30967	58156	692943	chromHMM_state7_EnhG1 Penis_Foreskin_Fibroblast_Primary_Cells_skin01 human	Penis_Foreskin_Fibroblast_Primary_Cells_skin01	NA	human	SKIN	PrimaryCulture	7_EnhG1_E055.bed	1	33754
hyper	40	chromHMM_state7_EnhG1	0	0.619945	892	29	48	15	48	30.7	17275	58857	706635	chromHMM_state7_EnhG1 Penis_Foreskin_Melanocyte_Primary_Cells_skin03 human	Penis_Foreskin_Melanocyte_Primary_Cells_skin03	NA	human	SKIN	PrimaryCulture	7_EnhG1_E061.bed	1	23399
hyper	65	chromHMM_state7_EnhG1	0	0.633482	695	29	45	22	45	32	13204	59054	710706	chromHMM_state7_EnhG1 Gastric human	Gastric	NA	human	GI_STOMACH	PrimaryTissue	7_EnhG1_E094.bed	1	15448
hyper	48	chromHMM_state7_EnhG1	0	0.660611	526	29	35	34	35	32.7	9604	59223	714306	chromHMM_state7_EnhG1 Brain_Hippocampus_Middle human	Brain_Hippocampus_Middle	NA	human	BRAIN	PrimaryTissue	7_EnhG1_E071.bed	1	12965
hyper	42	chromHMM_state7_EnhG1	0	0.641473	561	29	40	31	40	33.3	10541	59188	713369	chromHMM_state7_EnhG1 Adipose_Nuclei human	Adipose_Nuclei	NA	human	FAT	PrimaryTissue	7_EnhG1_E063.bed	1	14821
hyper	69	chromHMM_state7_EnhG1	0	0.615501	608	29	52	26	52	35.7	11893	59141	712017	chromHMM_state7_EnhG1 Pancreas human	Pancreas	NA	human	PANCREAS	PrimaryTissue	7_EnhG1_E098.bed	1	15409
hyper	7	chromHMM_state7_EnhG1	0	0.656374	459	29	36	47	47	37.3	8439	59290	715471	chromHMM_state7_EnhG1 hESC_Derived_CD184+_Endoderm_Cultured_Cells human	hESC_Derived_CD184+_Endoderm_Cultured_Cells	NA	human	ESC_DERIVED	ESCDerived	7_EnhG1_E011.bed	1	13861
hyper	47	chromHMM_state7_EnhG1	0	0.638191	473	29	42	42	42	37.7	8940	59276	714970	chromHMM_state7_EnhG1 Brain_Cingulate_Gyrus human	Brain_Cingulate_Gyrus	NA	human	BRAIN	PrimaryTissue	7_EnhG1_E069.bed	1	12051
hyper	87	chromHMM_state7_EnhG1	0	0.625284	472	29	46	44	46	39.7	9103	59277	714807	chromHMM_state7_EnhG1 HepG2_Hepatocellular_Carcinoma human	HepG2_Hepatocellular_Carcinoma	NA	human	LIVER	CellLine	7_EnhG1_E118.bed	1	14692
hyper	46	chromHMM_state7_EnhG1	0	0.616536	484	29	51	40	51	40	9464	59265	714446	chromHMM_state7_EnhG1 Brain_Anterior_Caudate human	Brain_Anterior_Caudate	NA	human	BRAIN	PrimaryTissue	7_EnhG1_E068.bed	1	13378
hyper	50	chromHMM_state7_EnhG1	0	0.606162	535	29	59	32	59	40	10632	59214	713278	chromHMM_state7_EnhG1 Brain_Mid_Frontal_Lobe human	Brain_Mid_Frontal_Lobe	NA	human	BRAIN	PrimaryTissue	7_EnhG1_E073.bed	1	12348
hyper	83	chromHMM_state7_EnhG1	0	0.617174	465	29	50	45	50	41.3	9085	59284	714825	chromHMM_state7_EnhG1 A549_EtOH_0.02pct_Lung_Carcinoma human	A549_EtOH_0.02pct_Lung_Carcinoma	NA	human	LUNG	CellLine	7_EnhG1_E114.bed	1	15960
hyper	24	chromHMM_state7_EnhG1	0	0.635919	380	29	44	53	53	42	7214	59369	716696	chromHMM_state7_EnhG1 CD4+_CD25-_CD45RA+_Naive_Primary_Cells human	CD4+_CD25-_CD45RA+_Naive_Primary_Cells	NA	human	BLOOD	PrimaryCell	7_EnhG1_E039.bed	1	10219
hyper	27	chromHMM_state7_EnhG1	0	0.636068	348	29	43	59	59	43.7	6607	59401	717303	chromHMM_state7_EnhG1 CD4+_CD25-_IL17+_PMA-Ionomcyin_stimulated_Th17_Primary_Cel	CD4+_CD25-_IL17+_PMA-Ionomcyin_stimulated_Th17_Primary_Cells	NA	human	BLOOD	PrimaryCell	7_EnhG1_E042.bed	1	9765
hyper	49	chromHMM_state7_EnhG1	0	0.581455	494	29	66	39	66	44.7	10233	59255	713677	chromHMM_state7_EnhG1 Brain_Inferior_Temporal_Lobe human	Brain_Inferior_Temporal_Lobe	NA	human	BRAIN	PrimaryTissue	7_EnhG1_E072.bed	1	14537
hyper	92	chromHMM_state7_EnhG1	0	0.612067	413	29	57	50	57	45.3	8140	59336	715770	chromHMM_state7_EnhG1 K562_Leukemia human	K562_Leukemia	NA	human	BLOOD	PrimaryCulture	7_EnhG1_E123.bed	1	15573
hyper	66	chromHMM_state7_EnhG1	0	0.563676	503	29	71	37	71	45.7	10742	59246	713168	chromHMM_state7_EnhG1 Left_Ventricle human	Left_Ventricle	NA	human	HEART	PrimaryTissue	7_EnhG1_E095.bed	1	20317
hyper	78	chromHMM_state7_EnhG1	0	0.563178	510	29	72	36	72	45.7	10900	59239	713010	chromHMM_state7_EnhG1 Skeletal_Muscle_Female human	Skeletal_Muscle_Female	NA	human	MUSCLE	PrimaryTissue	7_EnhG1_E108.bed	1	14037
hyper	45	chromHMM_state7_EnhG1	0	0.618726	347	29	49	60	60	46	6771	59402	717139	chromHMM_state7_EnhG1 Brain_Angular_Gyrus human	Brain_Angular_Gyrus	NA	human	BRAIN	PrimaryTissue	7_EnhG1_E067.bed	1	10528
hyper	28	chromHMM_state7_EnhG1	0	0.569174	473	29	69	42	69	46.7	10009	59276	713901	chromHMM_state7_EnhG1 CD4+_CD25-_Th_Primary_Cells human	CD4+_CD25-_Th_Primary_Cells	NA	human	BLOOD	PrimaryCell	7_EnhG1_E043.bed	1	12524
hyper	11	chromHMM_state7_EnhG1	0	0.61384	343	29	53	61	61	47.7	6746	59406	717164	chromHMM_state7_EnhG1 HUES6_Cell_Line human	HUES6_Cell_Line	NA	human	ESC	PrimaryCulture	7_EnhG1_E015.bed	1	10084
hyper	44	chromHMM_state7_EnhG1	0	0.574593	446	29	68	48	68	48.3	9353	59303	714557	chromHMM_state7_EnhG1 Adult_Liver human	Adult_Liver	NA	human	LIVER	PrimaryTissue	7_EnhG1_E066.bed	1	13777
hyper	96	chromHMM_state7_EnhG1	0	0.585356	391	29	65	52	65	48.7	8056	59358	715854	chromHMM_state7_EnhG1 NHEK-Epidermal_Keratinocytes human	NHEK-Epidermal_Keratinocytes	NA	human	SKIN	PrimaryCulture	7_EnhG1_E127.bed	1	14760
hyper	26	chromHMM_state7_EnhG1	0	0.531789	479	29	79	41	79	49.7	10837	59270	713073	chromHMM_state7_EnhG1 CD4+_CD25-_IL17-_PMA-Ionomycin_stimulated_MACS_purified_Th	CD4+_CD25-_IL17-_PMA-Ionomycin_stimulated_MACS_purified_Th_Primary_Cells	NA	human	BLOOD	PrimaryCell	7_EnhG1_E041.bed	1	17543
hyper	84	chromHMM_state7_EnhG1	0	0.552234	460	29	75	46	75	50	10030	59289	713880	chromHMM_state7_EnhG1 Dnd41_TCell_Leukemia human	Dnd41_TCell_Leukemia	NA	human	BLOOD	CellLine	7_EnhG1_E115.bed	1	14248
hyper	98	chromHMM_state7_EnhG1	0	0.577066	373	29	67	54	67	50	7796	59376	716114	chromHMM_state7_EnhG1 Osteoblasts human	Osteoblasts	NA	human	BONE	PrimaryCulture	7_EnhG1_E129.bed	1	16199
hyper	51	chromHMM_state7_EnhG1	0	0.600178	316	29	60	64	64	51	6357	59433	717553	chromHMM_state7_EnhG1 Brain_Substantia_Nigra human	Brain_Substantia_Nigra	NA	human	BRAIN	PrimaryTissue	7_EnhG1_E074.bed	1	9246
hyper	68	chromHMM_state7_EnhG1	0	0.611302	264	29	58	69	69	52	5218	59485	718692	chromHMM_state7_EnhG1 Ovary human	Ovary	NA	human	OVARY	PrimaryTissue	7_EnhG1_E097.bed	1	9506
hyper	93	chromHMM_state7_EnhG1	0	0.471765	501	29	90	38	90	52.3	12747	59248	711163	chromHMM_state7_EnhG1 Monocytes-CD14+_RO01746 human	Monocytes-CD14+_RO01746	NA	human	BLOOD	PrimaryCell	7_EnhG1_E124.bed	1	19337
hyper	19	chromHMM_state7_EnhG1	0	0.591284	288	29	63	68	68	53.3	5882	59461	718028	chromHMM_state7_EnhG1 CD14_Primary_Cells human	CD14_Primary_Cells	NA	human	BLOOD	PrimaryCell	7_EnhG1_E029.bed	1	9621
hyper	29	chromHMM_state7_EnhG1	0	0.558988	351	29	73	58	73	53.3	7573	59398	716337	chromHMM_state7_EnhG1 CD4+_CD25+_CD127-_Treg_Primary_Cells human	CD4+_CD25+_CD127-_Treg_Primary_Cells	NA	human	BLOOD	PrimaryCell	7_EnhG1_E044.bed	1	11546
hyper	89	chromHMM_state7_EnhG1	0	0.550019	368	29	76	55	76	53.3	8066	59381	715844	chromHMM_state7_EnhG1 HSMM_Skeletal_Muscle_Myoblasts human	HSMM_Skeletal_Muscle_Myoblasts	NA	human	MUSCLE	PrimaryCulture	7_EnhG1_E120.bed	1	16086
hyper	53	chromHMM_state7_EnhG1	0	0.596402	262	29	62	70	70	53.7	5307	59487	718603	chromHMM_state7_EnhG1 Colon_Smooth_Muscle human	Colon_Smooth_Muscle	NA	human	GI_COLON	PrimaryTissue	7_EnhG1_E076.bed	1	7541
hyper	85	chromHMM_state7_EnhG1	0	0.543623	355	29	77	57	77	54.3	7873	59394	716037	chromHMM_state7_EnhG1 GM12878_Lymphoblastoid human	GM12878_Lymphoblastoid	NA	human	BLOOD	PrimaryCulture	7_EnhG1_E116.bed	1	15531
hyper	54	chromHMM_state7_EnhG1	0	0.563855	292	29	70	67	70	55.3	6251	59457	717659	chromHMM_state7_EnhG1 Duodenum_Smooth_Muscle human	Duodenum_Smooth_Muscle	NA	human	GI_DUODENUM	PrimaryTissue	7_EnhG1_E078.bed	1	9332
hyper	18	chromHMM_state7_EnhG1	0	0.529705	251	29	80	72	80	60.3	5720	59498	718190	chromHMM_state7_EnhG1 Bone_Marrow_Derived_Mesenchymal_Stem_Cell_Cultured_Cells h	Bone_Marrow_Derived_Mesenchymal_Stem_Cell_Cultured_Cells	NA	human	STROMAL_CONNECTIVE	PrimaryCulture	7_EnhG1_E026.bed	1	13191
hyper	34	chromHMM_state7_EnhG1	0	0.472717	317	29	89	63	89	60.3	8077	59432	715833	chromHMM_state7_EnhG1 Chondrocytes_from_Bone_Marrow_Derived_Mesenchymal_Stem_Cel	Chondrocytes_from_Bone_Marrow_Derived_Mesenchymal_Stem_Cell_Cultured_Cells	NA	human	STROMAL_CONNECTIVE	PrimaryCulture	7_EnhG1_E049.bed	1	17631
hyper	30	chromHMM_state7_EnhG1	0	0.555161	173	29	74	84	84	62.3	3767	59576	720143	chromHMM_state7_EnhG1 CD4+_CD25int_CD127+_Tmem_Primary_Cells human	CD4+_CD25int_CD127+_Tmem_Primary_Cells	NA	human	BLOOD	PrimaryCell	7_EnhG1_E045.bed	1	5810
hyper	23	chromHMM_state7_EnhG1	0	0.520161	191	29	81	80	81	63.3	4436	59558	719474	chromHMM_state7_EnhG1 CD4_Naive_Primary_Cells human	CD4_Naive_Primary_Cells	NA	human	BLOOD	PrimaryCell	7_EnhG1_E038.bed	1	6444
hyper	91	chromHMM_state7_EnhG1	0	0.519291	179	29	82	81	82	64	4165	59570	719745	chromHMM_state7_EnhG1 HUVEC_Umbilical_Vein_Endothelial_Cells human	HUVEC_Umbilical_Vein_Endothelial_Cells	NA	human	VASCULAR	PrimaryCulture	7_EnhG1_E122.bed	1	8755
hyper	86	chromHMM_state7_EnhG1	0	0.500312	193	29	85	79	85	64.3	4659	59556	719251	chromHMM_state7_EnhG1 HeLa-S3_Cervical_Carcinoma human	HeLa-S3_Cervical_Carcinoma	NA	human	CERVIX	CellLine	7_EnhG1_E117.bed	1	8427
hyper	95	chromHMM_state7_EnhG1	0	0.46219	243	29	92	73	92	64.7	6340	59506	717570	chromHMM_state7_EnhG1 NHDF-Ad_Adult_Dermal_Fibroblasts human	NHDF-Ad_Adult_Dermal_Fibroblasts	NA	human	SKIN	PrimaryCulture	7_EnhG1_E126.bed	1	12031
hyper	15	chromHMM_state7_EnhG1	0	0.509498	175	29	84	83	84	65.3	4150	59574	719760	chromHMM_state7_EnhG1 iPS-20b_Cell_Line human	iPS-20b_Cell_Line	NA	human	IPSC	PrimaryCulture	7_EnhG1_E020.bed	1	7620
hyper	74	chromHMM_state7_EnhG1	0	0.514095	148	29	83	86	86	66	3480	59601	720430	chromHMM_state7_EnhG1 Rectal_Smooth_Muscle human	Rectal_Smooth_Muscle	NA	human	GI_RECTUM	PrimaryTissue	7_EnhG1_E103.bed	1	5465
hyper	94	chromHMM_state7_EnhG1	0	0.479083	176	29	88	82	88	66.3	4437	59573	719473	chromHMM_state7_EnhG1 NH-A_Astrocytes human	NH-A_Astrocytes	NA	human	BRAIN	PrimaryCulture	7_EnhG1_E125.bed	1	8611
hyper	33	chromHMM_state7_EnhG1	0	0.499443	151	29	86	85	86	66.7	3654	59598	720256	chromHMM_state7_EnhG1 CD8_Memory_Primary_Cells human	CD8_Memory_Primary_Cells	NA	human	BLOOD	PrimaryCell	7_EnhG1_E048.bed	1	5582
hyper	22	chromHMM_state7_EnhG1	0	0.453298	148	29	93	86	93	69.3	3944	59601	719966	chromHMM_state7_EnhG1 CD4_Memory_Primary_Cells human	CD4_Memory_Primary_Cells	NA	human	BLOOD	PrimaryCell	7_EnhG1_E037.bed	1	6148
hyper	32	chromHMM_state7_EnhG1	0	0.463714	141	29	91	89	91	69.7	3674	59608	720236	chromHMM_state7_EnhG1 CD8_Naive_Primary_Cells human	CD8_Naive_Primary_Cells	NA	human	BLOOD	PrimaryCell	7_EnhG1_E047.bed	1	5404
hyper	14	chromHMM_state7_EnhG1	0	0.435301	94	29	94	93	94	72	2611	59655	721299	chromHMM_state7_EnhG1 iPS-18_Cell_Line human	iPS-18_Cell_Line	NA	human	IPSC	PrimaryCulture	7_EnhG1_E019.bed	1	5102
hyper	25	chromHMM_state7_EnhG1	0	0.347	81	29	97	94	97	73.3	2821	59668	721089	chromHMM_state7_EnhG1 CD4+_CD25-_CD45RO+_Memory_Primary_Cells human	CD4+_CD25-_CD45RO+_Memory_Primary_Cells	NA	human	BLOOD	PrimaryCell	7_EnhG1_E040.bed	1	5321
hyper	58	chromHMM_state8_EnhG2	14.6787	1.28614	1174	1	2	1	2	1.33	11108	58575	712802	chromHMM_state8_EnhG2 Fetal_Intestine_Small human	Fetal_Intestine_Small	NA	human	GI_INTESTINE	PrimaryTissue	8_EnhG2_E085.bed	2.05351e-13	8859
hyper	63	chromHMM_state8_EnhG2	6.18832	1.17871	1015	2	4	3	4	3	10460	58734	713450	chromHMM_state8_EnhG2 Fetal_Stomach human	Fetal_Stomach	NA	human	GI_STOMACH	PrimaryTissue	8_EnhG2_E092.bed	3.17594e-05	7689
hyper	64	chromHMM_state8_EnhG2	1.56521	1.09986	469	3	6	9	9	6	5170	59280	718740	chromHMM_state8_EnhG2 Fetal_Thymus human	Fetal_Thymus	NA	human	THYMUS	PrimaryTissue	8_EnhG2_E093.bed	0.88899	4323
hyper	70	chromHMM_state8_EnhG2	1.30903	1.59203	18	4	1	90	90	31.7	137	59731	723773	chromHMM_state8_EnhG2 Placenta_Amnion human	Placenta_Amnion	NA	human	PLACENTA	PrimaryTissue	8_EnhG2_E099.bed	1	179
hyper	82	chromHMM_state8_EnhG2	1.18714	1.07895	455	5	7	10	10	7.33	5112	59294	718798	chromHMM_state8_EnhG2 Spleen human	Spleen	NA	human	SPLEEN	PrimaryTissue	8_EnhG2_E113.bed	1	3804
hyper	13	chromHMM_state8_EnhG2	1.11673	1.05488	816	6	10	5	10	7	9379	58933	714531	chromHMM_state8_EnhG2 IMR90_Cell_Line human	IMR90_Cell_Line	NA	human	LUNG	CellLine	8_EnhG2_E017.bed	1	8475
hyper	17	chromHMM_state8_EnhG2	1.029	1.06883	451	7	9	11	11	9	5115	59298	718795	chromHMM_state8_EnhG2 iPS_DF_19.11_Cell_Line human	iPS_DF_19.11_Cell_Line	NA	human	IPSC	PrimaryCulture	8_EnhG2_E022.bed	1	3617
hyper	68	chromHMM_state8_EnhG2	0.991305	1.19016	66	8	3	76	76	29	672	59683	723238	chromHMM_state8_EnhG2 Ovary human	Ovary	NA	human	OVARY	PrimaryTissue	8_EnhG2_E097.bed	1	827
hyper	75	chromHMM_state8_EnhG2	0.963523	1.13908	108	9	5	64	64	26	1149	59641	722761	chromHMM_state8_EnhG2 Right_Atrium human	Right_Atrium	NA	human	HEART	PrimaryTissue	8_EnhG2_E104.bed	1	679
hyper	81	chromHMM_state8_EnhG2	0.787252	1.07326	226	10	8	34	34	17.3	2552	59523	721358	chromHMM_state8_EnhG2 Thymus human	Thymus	NA	human	THYMUS	PrimaryTissue	8_EnhG2_E112.bed	1	2508
hyper	9	chromHMM_state8_EnhG2	0.359521	1.01259	234	11	12	31	31	18	2800	59515	721110	chromHMM_state8_EnhG2 hESC_Derived_CD56+_Mesoderm_Cultured_Cells human	hESC_Derived_CD56+_Mesoderm_Cultured_Cells	NA	human	ESC_DERIVED	ESCDerived	8_EnhG2_E013.bed	1	3256
hyper	5	chromHMM_state8_EnhG2	0.308057	1.0343	14	12	11	92	92	38.3	164	59735	723746	chromHMM_state8_EnhG2 H1_Derived_Neuronal_Progenitor_Cultured_Cells human	H1_Derived_Neuronal_Progenitor_Cultured_Cells	NA	human	ESC_DERIVED	ESCDerived	8_EnhG2_E007.bed	1	209
hyper	6	chromHMM_state8_EnhG2	0.258446	0.990235	17	13	13	91	91	39	208	59732	723702	chromHMM_state8_EnhG2 H9_Cell_Line human	H9_Cell_Line	NA	human	ESC	PrimaryCulture	8_EnhG2_E008.bed	1	386
hyper	61	chromHMM_state8_EnhG2	0.0965768	0.966277	631	14	14	6	14	11.3	7909	59118	716001	chromHMM_state8_EnhG2 Fetal_Muscle_Leg human	Fetal_Muscle_Leg	NA	human	MUSCLE_LEG	PrimaryTissue	8_EnhG2_E090.bed	1	6561
hyper	3	chromHMM_state8_EnhG2	0.0964848	0.950816	284	15	15	23	23	17.7	3618	59465	720292	chromHMM_state8_EnhG2 H1_BMP4_Derived_Trophoblast_Cultured_Cells human	H1_BMP4_Derived_Trophoblast_Cultured_Cells	NA	human	ESC_DERIVED	ESCDerived	8_EnhG2_E005.bed	1	3470
hyper	53	chromHMM_state8_EnhG2	0.0746244	0.919168	140	16	16	55	55	29	1845	59609	722065	chromHMM_state8_EnhG2 Colon_Smooth_Muscle human	Colon_Smooth_Muscle	NA	human	GI_COLON	PrimaryTissue	8_EnhG2_E076.bed	1	1965
hyper	65	chromHMM_state8_EnhG2	0.0736803	0.893461	77	17	21	75	75	37.7	1044	59672	722866	chromHMM_state8_EnhG2 Gastric human	Gastric	NA	human	GI_STOMACH	PrimaryTissue	8_EnhG2_E094.bed	1	1134
hyper	2	chromHMM_state8_EnhG2	0.0701019	0.526799	1	18	76	97	97	63.7	23	59748	723887	chromHMM_state8_EnhG2 H1_BMP4_Derived_Mesendoderm_Cultured_Cells human	H1_BMP4_Derived_Mesendoderm_Cultured_Cells	NA	human	ESC_DERIVED	ESCDerived	8_EnhG2_E004.bed	1	41
hyper	52	chromHMM_state8_EnhG2	0.0697404	0.915458	138	19	18	57	57	31.3	1826	59611	722084	chromHMM_state8_EnhG2 Colonic_Mucosa human	Colonic_Mucosa	NA	human	GI_COLON	PrimaryTissue	8_EnhG2_E075.bed	1	1597
hyper	43	chromHMM_state8_EnhG2	0.0367663	0.816236	44	20	27	82	82	43	653	59705	723257	chromHMM_state8_EnhG2 Aorta human	Aorta	NA	human	VASCULAR	PrimaryTissue	8_EnhG2_E065.bed	1	1211
hyper	57	chromHMM_state8_EnhG2	0.0274754	0.912917	294	21	19	22	22	20.7	3900	59455	720010	chromHMM_state8_EnhG2 Fetal_Intestine_Large human	Fetal_Intestine_Large	NA	human	GI_INTESTINE	PrimaryTissue	8_EnhG2_E084.bed	1	4460
hyper	92	chromHMM_state8_EnhG2	0.0221067	0.918552	389	22	17	13	22	17.3	5128	59360	718782	chromHMM_state8_EnhG2 K562_Leukemia human	K562_Leukemia	NA	human	BLOOD	PrimaryCulture	8_EnhG2_E123.bed	1	5926
hyper	67	chromHMM_state8_EnhG2	0.0151296	0.902427	323	23	20	18	23	20.3	4334	59426	719576	chromHMM_state8_EnhG2 Lung human	Lung	NA	human	LUNG	PrimaryTissue	8_EnhG2_E096.bed	1	4352
hyper	4	chromHMM_state8_EnhG2	0.0117055	0.887478	267	24	22	24	24	23.3	3643	59482	720267	chromHMM_state8_EnhG2 H1_Derived_Mesenchymal_Stem_Cells human	H1_Derived_Mesenchymal_Stem_Cells	NA	human	ESC_DERIVED	ESCDerived	8_EnhG2_E006.bed	1	3718
hyper	59	chromHMM_state8_EnhG2	0.0114577	0.269229	1	25	98	97	98	73.3	45	59748	723865	chromHMM_state8_EnhG2 Pancreatic_Islets human	Pancreatic_Islets	NA	human	PANCREAS	PrimaryTissue	8_EnhG2_E087.bed	1	72
hyper	79	chromHMM_state8_EnhG2	0.00841443	0.487865	6	26	87	95	95	69.3	149	59743	723761	chromHMM_state8_EnhG2 Small_Intestine human	Small_Intestine	NA	human	GI_INTESTINE	PrimaryTissue	8_EnhG2_E109.bed	1	251
hyper	7	chromHMM_state8_EnhG2	0.00633082	0.791703	84	27	33	72	72	44	1285	59665	722625	chromHMM_state8_EnhG2 hESC_Derived_CD184+_Endoderm_Cultured_Cells human	hESC_Derived_CD184+_Endoderm_Cultured_Cells	NA	human	ESC_DERIVED	ESCDerived	8_EnhG2_E011.bed	1	1519
hyper	8	chromHMM_state8_EnhG2	0.00608779	0.490207	7	28	85	93	93	68.7	173	59742	723737	chromHMM_state8_EnhG2 hESC_Derived_CD56+_Ectoderm_Cultured_Cells human	hESC_Derived_CD56+_Ectoderm_Cultured_Cells	NA	human	ESC_DERIVED	ESCDerived	8_EnhG2_E012.bed	1	190
hyper	11	chromHMM_state8_EnhG2	0.00539195	0.787632	85	29	34	71	71	44.7	1307	59664	722603	chromHMM_state8_EnhG2 HUES6_Cell_Line human	HUES6_Cell_Line	NA	human	ESC	PrimaryCulture	8_EnhG2_E015.bed	1	1665
hyper	16	chromHMM_state8_EnhG2	0.00508434	0.302873	2	30	96	96	96	74	80	59747	723830	chromHMM_state8_EnhG2 iPS_DF_6.9_Cell_Line human	iPS_DF_6.9_Cell_Line	NA	human	IPSC	PrimaryCulture	8_EnhG2_E021.bed	1	160
hyper	77	chromHMM_state8_EnhG2	0.00407922	0.83061	159	31	26	50	50	35.7	2318	59590	721592	chromHMM_state8_EnhG2 Sigmoid_Colon human	Sigmoid_Colon	NA	human	GI_COLON	PrimaryTissue	8_EnhG2_E106.bed	1	2553
hyper	71	chromHMM_state8_EnhG2	0.00223034	0.43937	7	32	90	93	93	71.7	193	59742	723717	chromHMM_state8_EnhG2 Psoas_Muscle human	Psoas_Muscle	NA	human	MUSCLE	PrimaryTissue	8_EnhG2_E100.bed	1	334
hyper	1	chromHMM_state8_EnhG2	0.00156918	0.70636	55	33	52	80	80	55	943	59694	722967	chromHMM_state8_EnhG2 H1_Cell_Line human	H1_Cell_Line	NA	human	ESC	PrimaryCulture	8_EnhG2_E003.bed	1	1046
hyper	73	chromHMM_state8_EnhG2	0.000925548	0.781177	130	34	35	59	59	42.7	2015	59619	721895	chromHMM_state8_EnhG2 Rectal_Mucosa.Donor_31 human	Rectal_Mucosa.Donor_31	NA	human	GI_RECTUM	PrimaryTissue	8_EnhG2_E102.bed	1	2194
hyper	62	chromHMM_state8_EnhG2	0.000249508	0.815135	252	35	28	28	35	30.3	3742	59497	720168	chromHMM_state8_EnhG2 Fetal_Placenta human	Fetal_Placenta	NA	human	PLACENTA	PrimaryTissue	8_EnhG2_E091.bed	1	3342
hyper	69	chromHMM_state8_EnhG2	0.000210332	0.591605	34	36	70	84	84	63.3	696	59715	723214	chromHMM_state8_EnhG2 Pancreas human	Pancreas	NA	human	PANCREAS	PrimaryTissue	8_EnhG2_E098.bed	1	623
hyper	54	chromHMM_state8_EnhG2	0.000101864	0.6852	79	37	55	74	74	55.3	1396	59670	722514	chromHMM_state8_EnhG2 Duodenum_Smooth_Muscle human	Duodenum_Smooth_Muscle	NA	human	GI_DUODENUM	PrimaryTissue	8_EnhG2_E078.bed	1	1674
hyper	48	chromHMM_state8_EnhG2	8.68466e-05	0.803555	260	38	31	26	38	31.7	3916	59489	719994	chromHMM_state8_EnhG2 Brain_Hippocampus_Middle human	Brain_Hippocampus_Middle	NA	human	BRAIN	PrimaryTissue	8_EnhG2_E071.bed	1	4101
hyper	56	chromHMM_state8_EnhG2	8.5231e-05	0.857469	545	39	24	7	39	23.3	7689	59204	716221	chromHMM_state8_EnhG2 Fetal_Adrenal_Gland human	Fetal_Adrenal_Gland	NA	human	ADRENAL	PrimaryTissue	8_EnhG2_E080.bed	1	7169
hyper	14	chromHMM_state8_EnhG2	7.76409e-05	0.560066	32	40	74	85	85	66.3	692	59717	723218	chromHMM_state8_EnhG2 iPS-18_Cell_Line human	iPS-18_Cell_Line	NA	human	IPSC	PrimaryCulture	8_EnhG2_E019.bed	1	809
hyper	32	chromHMM_state8_EnhG2	7.62207e-05	0.504674	22	41	81	88	88	70	528	59727	723382	chromHMM_state8_EnhG2 CD8_Naive_Primary_Cells human	CD8_Naive_Primary_Cells	NA	human	BLOOD	PrimaryCell	8_EnhG2_E047.bed	1	701
hyper	51	chromHMM_state8_EnhG2	6.42124e-05	0.740621	139	42	43	56	56	47	2272	59610	721638	chromHMM_state8_EnhG2 Brain_Substantia_Nigra human	Brain_Substantia_Nigra	NA	human	BRAIN	PrimaryTissue	8_EnhG2_E074.bed	1	2777
hyper	90	chromHMM_state8_EnhG2	5.11813e-05	0.714743	113	43	50	63	63	52	1914	59636	721996	chromHMM_state8_EnhG2 HSMMtube_Skeletal_Muscle_Myotubes_Derived_from_HSMM human	HSMMtube_Skeletal_Muscle_Myotubes_Derived_from_HSMM	NA	human	MUSCLE	PrimaryCulture	8_EnhG2_E121.bed	1	3020
hyper	76	chromHMM_state8_EnhG2	3.85094e-05	0.7782	219	44	36	37	44	39	3406	59530	720504	chromHMM_state8_EnhG2 Right_Ventricle human	Right_Ventricle	NA	human	HEART	PrimaryTissue	8_EnhG2_E105.bed	1	2808
hyper	74	chromHMM_state8_EnhG2	3.22316e-05	0.678175	88	45	57	69	69	57	1571	59661	722339	chromHMM_state8_EnhG2 Rectal_Smooth_Muscle human	Rectal_Smooth_Muscle	NA	human	GI_RECTUM	PrimaryTissue	8_EnhG2_E103.bed	1	1692
hyper	38	chromHMM_state8_EnhG2	1.37913e-05	0.806437	345	46	30	17	46	31	5176	59404	718734	chromHMM_state8_EnhG2 Penis_Foreskin_Keratinocyte_Primary_Cells_skin03 human	Penis_Foreskin_Keratinocyte_Primary_Cells_skin03	NA	human	SKIN	PrimaryCulture	8_EnhG2_E058.bed	1	5043
hyper	19	chromHMM_state8_EnhG2	1.15369e-05	0.734361	164	47	44	49	49	46.7	2703	59585	721207	chromHMM_state8_EnhG2 CD14_Primary_Cells human	CD14_Primary_Cells	NA	human	BLOOD	PrimaryCell	8_EnhG2_E029.bed	1	2671
hyper	37	chromHMM_state8_EnhG2	1.03716e-05	0.880914	1079	48	23	2	48	24.3	14804	58670	709106	chromHMM_state8_EnhG2 Penis_Foreskin_Fibroblast_Primary_Cells_skin02 human	Penis_Foreskin_Fibroblast_Primary_Cells_skin02	NA	human	SKIN	PrimaryCulture	8_EnhG2_E056.bed	1	10110
hyper	15	chromHMM_state8_EnhG2	9.15856e-06	0.61513	63	49	65	79	79	64.3	1240	59686	722670	chromHMM_state8_EnhG2 iPS-20b_Cell_Line human	iPS-20b_Cell_Line	NA	human	IPSC	PrimaryCulture	8_EnhG2_E020.bed	1	1514
hyper	97	chromHMM_state8_EnhG2	8.79539e-06	0.807403	368	50	29	15	50	31.3	5514	59381	718396	chromHMM_state8_EnhG2 NHLF_Lung_Fibroblasts human	NHLF_Lung_Fibroblasts	NA	human	LUNG	PrimaryCulture	8_EnhG2_E128.bed	1	4754
hyper	87	chromHMM_state8_EnhG2	8.73782e-06	0.758785	215	51	38	39	51	42.7	3429	59534	720481	chromHMM_state8_EnhG2 HepG2_Hepatocellular_Carcinoma human	HepG2_Hepatocellular_Carcinoma	NA	human	LIVER	CellLine	8_EnhG2_E118.bed	1	4128
hyper	47	chromHMM_state8_EnhG2	4.99636e-06	0.724852	165	52	47	48	52	49	2755	59584	721155	chromHMM_state8_EnhG2 Brain_Cingulate_Gyrus human	Brain_Cingulate_Gyrus	NA	human	BRAIN	PrimaryTissue	8_EnhG2_E069.bed	1	3237
hyper	46	chromHMM_state8_EnhG2	3.61235e-06	0.731131	181	53	45	45	53	47.7	2996	59568	720914	chromHMM_state8_EnhG2 Brain_Anterior_Caudate human	Brain_Anterior_Caudate	NA	human	BRAIN	PrimaryTissue	8_EnhG2_E068.bed	1	3631
hyper	55	chromHMM_state8_EnhG2	3.29014e-06	0.710838	152	54	51	53	54	52.7	2588	59597	721322	chromHMM_state8_EnhG2 Esophagus human	Esophagus	NA	human	GI_ESOPHAGUS	PrimaryTissue	8_EnhG2_E079.bed	1	2384
hyper	66	chromHMM_state8_EnhG2	3.28982e-06	0.728891	179	55	46	46	55	49	2972	59570	720938	chromHMM_state8_EnhG2 Left_Ventricle human	Left_Ventricle	NA	human	HEART	PrimaryTissue	8_EnhG2_E095.bed	1	4007
hyper	41	chromHMM_state8_EnhG2	2.9989e-06	0.641791	87	56	61	70	70	62.3	1641	59662	722269	chromHMM_state8_EnhG2 Peripheral_Blood_Mononuclear_Primary_Cells human	Peripheral_Blood_Mononuclear_Primary_Cells	NA	human	BLOOD	PrimaryCell	8_EnhG2_E062.bed	1	1441
hyper	80	chromHMM_state8_EnhG2	2.21683e-06	0.799966	390	57	32	12	57	33.7	5897	59359	718013	chromHMM_state8_EnhG2 Stomach_Smooth_Muscle human	Stomach_Smooth_Muscle	NA	human	GI_STOMACH	PrimaryTissue	8_EnhG2_E111.bed	1	5201
hyper	50	chromHMM_state8_EnhG2	2.09551e-06	0.705639	152	58	53	53	58	54.7	2607	59597	721303	chromHMM_state8_EnhG2 Brain_Mid_Frontal_Lobe human	Brain_Mid_Frontal_Lobe	NA	human	BRAIN	PrimaryTissue	8_EnhG2_E073.bed	1	2871
hyper	42	chromHMM_state8_EnhG2	2.07324e-06	0.743797	216	59	41	38	59	46	3514	59533	720396	chromHMM_state8_EnhG2 Adipose_Nuclei human	Adipose_Nuclei	NA	human	FAT	PrimaryTissue	8_EnhG2_E063.bed	1	3787
hyper	40	chromHMM_state8_EnhG2	1.15483e-06	0.775047	314	60	37	19	60	38.7	4901	59435	719009	chromHMM_state8_EnhG2 Penis_Foreskin_Melanocyte_Primary_Cells_skin03 human	Penis_Foreskin_Melanocyte_Primary_Cells_skin03	NA	human	SKIN	PrimaryCulture	8_EnhG2_E061.bed	1	4768
hyper	39	chromHMM_state8_EnhG2	8.13752e-07	0.74508	239	61	40	29	61	43.3	3881	59510	720029	chromHMM_state8_EnhG2 Penis_Foreskin_Melanocyte_Primary_Cells_skin01 human	Penis_Foreskin_Melanocyte_Primary_Cells_skin01	NA	human	SKIN	PrimaryCulture	8_EnhG2_E059.bed	1	3623
hyper	10	chromHMM_state8_EnhG2	6.80884e-07	0.614995	82	62	66	73	73	67	1614	59667	722296	chromHMM_state8_EnhG2 HUES48_Cell_Line human	HUES48_Cell_Line	NA	human	ESC	PrimaryCulture	8_EnhG2_E014.bed	1	1964
hyper	12	chromHMM_state8_EnhG2	5.1562e-07	0.581492	66	63	72	76	76	70.3	1374	59683	722536	chromHMM_state8_EnhG2 HUES64_Cell_Line human	HUES64_Cell_Line	NA	human	ESC	PrimaryCulture	8_EnhG2_E016.bed	1	1635
hyper	60	chromHMM_state8_EnhG2	2.63811e-07	0.719276	207	64	48	41	64	51	3482	59542	720428	chromHMM_state8_EnhG2 Fetal_Muscle_Trunk human	Fetal_Muscle_Trunk	NA	human	MUSCLE	PrimaryTissue	8_EnhG2_E089.bed	1	2910
hyper	49	chromHMM_state8_EnhG2	2.27624e-07	0.70525	185	65	54	43	65	54	3174	59564	720736	chromHMM_state8_EnhG2 Brain_Inferior_Temporal_Lobe human	Brain_Inferior_Temporal_Lobe	NA	human	BRAIN	PrimaryTissue	8_EnhG2_E072.bed	1	3899
hyper	72	chromHMM_state8_EnhG2	2.14406e-07	0.683118	154	66	56	51	66	57.7	2728	59595	721182	chromHMM_state8_EnhG2 Rectal_Mucosa.Donor_29 human	Rectal_Mucosa.Donor_29	NA	human	GI_RECTUM	PrimaryTissue	8_EnhG2_E101.bed	1	2793
hyper	36	chromHMM_state8_EnhG2	8.90783e-08	0.850481	1013	67	25	4	67	32	14388	58736	709522	chromHMM_state8_EnhG2 Penis_Foreskin_Fibroblast_Primary_Cells_skin01 human	Penis_Foreskin_Fibroblast_Primary_Cells_skin01	NA	human	SKIN	PrimaryCulture	8_EnhG2_E055.bed	1	11049
hyper	22	chromHMM_state8_EnhG2	6.81908e-08	0.48335	40	68	88	83	88	79.7	1002	59709	722908	chromHMM_state8_EnhG2 CD4_Memory_Primary_Cells human	CD4_Memory_Primary_Cells	NA	human	BLOOD	PrimaryCell	8_EnhG2_E037.bed	1	1146
hyper	35	chromHMM_state8_EnhG2	7.4002e-09	0.632795	132	69	62	58	69	63	2524	59617	721386	chromHMM_state8_EnhG2 Mobilized_CD34_Primary_Cells_Female human	Mobilized_CD34_Primary_Cells_Female	NA	human	BLOOD	PrimaryCell	8_EnhG2_E050.bed	1	2749
hyper	44	chromHMM_state8_EnhG2	4.35956e-09	0.666873	178	70	58	47	70	58.3	3229	59571	720681	chromHMM_state8_EnhG2 Adult_Liver human	Adult_Liver	NA	human	LIVER	PrimaryTissue	8_EnhG2_E066.bed	1	3743
hyper	83	chromHMM_state8_EnhG2	1.47709e-09	0.740655	362	71	42	16	71	43	5909	59387	718001	chromHMM_state8_EnhG2 A549_EtOH_0.02pct_Lung_Carcinoma human	A549_EtOH_0.02pct_Lung_Carcinoma	NA	human	LUNG	CellLine	8_EnhG2_E114.bed	1	6528
hyper	45	chromHMM_state8_EnhG2	1.3995e-09	0.515421	64	72	80	78	80	76.7	1503	59685	722407	chromHMM_state8_EnhG2 Brain_Angular_Gyrus human	Brain_Angular_Gyrus	NA	human	BRAIN	PrimaryTissue	8_EnhG2_E067.bed	1	2115
hyper	25	chromHMM_state8_EnhG2	5.87022e-10	0.386663	29	73	93	86	93	84	908	59720	723002	chromHMM_state8_EnhG2 CD4+_CD25-_CD45RO+_Memory_Primary_Cells human	CD4+_CD25-_CD45RO+_Memory_Primary_Cells	NA	human	BLOOD	PrimaryCell	8_EnhG2_E040.bed	1	1073
hyper	78	chromHMM_state8_EnhG2	1.63856e-10	0.664151	210	74	59	40	74	57.7	3824	59539	720086	chromHMM_state8_EnhG2 Skeletal_Muscle_Female human	Skeletal_Muscle_Female	NA	human	MUSCLE	PrimaryTissue	8_EnhG2_E108.bed	1	3713
hyper	33	chromHMM_state8_EnhG2	1.34029e-10	0.319031	20	75	95	89	95	86.3	759	59729	723151	chromHMM_state8_EnhG2 CD8_Memory_Primary_Cells human	CD8_Memory_Primary_Cells	NA	human	BLOOD	PrimaryCell	8_EnhG2_E048.bed	1	803
hyper	84	chromHMM_state8_EnhG2	1.62503e-11	0.751589	510	76	39	8	76	41	8198	59239	715712	chromHMM_state8_EnhG2 Dnd41_TCell_Leukemia human	Dnd41_TCell_Leukemia	NA	human	BLOOD	CellLine	8_EnhG2_E115.bed	1	6559
hyper	96	chromHMM_state8_EnhG2	6.63612e-12	0.715127	377	77	49	14	77	46.7	6371	59372	717539	chromHMM_state8_EnhG2 NHEK-Epidermal_Keratinocytes human	NHEK-Epidermal_Keratinocytes	NA	human	SKIN	PrimaryCulture	8_EnhG2_E127.bed	1	6759
hyper	91	chromHMM_state8_EnhG2	6.48621e-12	0.568704	121	78	73	60	78	70.3	2574	59628	721336	chromHMM_state8_EnhG2 HUVEC_Umbilical_Vein_Endothelial_Cells human	HUVEC_Umbilical_Vein_Endothelial_Cells	NA	human	VASCULAR	PrimaryCulture	8_EnhG2_E122.bed	1	3124
hyper	30	chromHMM_state8_EnhG2	1.13979e-12	0.420871	49	79	92	81	92	84	1409	59700	722501	chromHMM_state8_EnhG2 CD4+_CD25int_CD127+_Tmem_Primary_Cells human	CD4+_CD25int_CD127+_Tmem_Primary_Cells	NA	human	BLOOD	PrimaryCell	8_EnhG2_E045.bed	1	1564
hyper	28	chromHMM_state8_EnhG2	4.54488e-13	0.518041	96	80	79	68	80	75.7	2242	59653	721668	chromHMM_state8_EnhG2 CD4+_CD25-_Th_Primary_Cells human	CD4+_CD25-_Th_Primary_Cells	NA	human	BLOOD	PrimaryCell	8_EnhG2_E043.bed	1	2107
hyper	88	chromHMM_state8_EnhG2	3.99666e-13	0.52188	99	81	78	67	81	75.3	2295	59650	721615	chromHMM_state8_EnhG2 HMEC_Mammary_Epithelial human	HMEC_Mammary_Epithelial	NA	human	BREAST	PrimaryCulture	8_EnhG2_E119.bed	1	2789
hyper	94	chromHMM_state8_EnhG2	7.65676e-14	0.52531	108	82	77	64	82	74.3	2487	59641	721423	chromHMM_state8_EnhG2 NH-A_Astrocytes human	NH-A_Astrocytes	NA	human	BRAIN	PrimaryCulture	8_EnhG2_E125.bed	1	2938
hyper	23	chromHMM_state8_EnhG2	6.14277e-14	0.296432	24	83	97	87	97	89	980	59725	722930	chromHMM_state8_EnhG2 CD4_Naive_Primary_Cells human	CD4_Naive_Primary_Cells	NA	human	BLOOD	PrimaryCell	8_EnhG2_E038.bed	1	856
hyper	31	chromHMM_state8_EnhG2	6.02705e-15	0.623076	235	84	63	30	84	59	4559	59514	719351	chromHMM_state8_EnhG2 CD56_Primary_Cells human	CD56_Primary_Cells	NA	human	BLOOD	PrimaryCell	8_EnhG2_E046.bed	1	4237
hyper	20	chromHMM_state8_EnhG2	2.41082e-15	0.585104	184	85	71	44	85	66.7	3802	59565	720108	chromHMM_state8_EnhG2 CD19_Primary_Cells_Peripheral_UW human	CD19_Primary_Cells_Peripheral_UW	NA	human	BLOOD	PrimaryCell	8_EnhG2_E032.bed	1	3649
hyper	89	chromHMM_state8_EnhG2	2.31439e-15	0.616375	231	86	64	33	86	61	4530	59518	719380	chromHMM_state8_EnhG2 HSMM_Skeletal_Muscle_Myoblasts human	HSMM_Skeletal_Muscle_Myoblasts	NA	human	MUSCLE	PrimaryCulture	8_EnhG2_E120.bed	1	5888
hyper	18	chromHMM_state8_EnhG2	3.85731e-16	0.593351	207	87	69	41	87	65.7	4217	59542	719693	chromHMM_state8_EnhG2 Bone_Marrow_Derived_Mesenchymal_Stem_Cell_Cultured_Cells h	Bone_Marrow_Derived_Mesenchymal_Stem_Cell_Cultured_Cells	NA	human	STROMAL_CONNECTIVE	PrimaryCulture	8_EnhG2_E026.bed	1	4976
hyper	98	chromHMM_state8_EnhG2	2.89298e-16	0.644252	305	88	60	21	88	56.3	5720	59444	718190	chromHMM_state8_EnhG2 Osteoblasts human	Osteoblasts	NA	human	BONE	PrimaryCulture	8_EnhG2_E129.bed	1	6907
hyper	93	chromHMM_state8_EnhG2	2.89298e-16	0.607845	232	88	68	32	88	62.7	4613	59517	719297	chromHMM_state8_EnhG2 Monocytes-CD14+_RO01746 human	Monocytes-CD14+_RO01746	NA	human	BLOOD	PrimaryCell	8_EnhG2_E124.bed	1	6272
hyper	95	chromHMM_state8_EnhG2	9.64327e-17	0.503163	117	90	82	62	90	78	2812	59632	721098	chromHMM_state8_EnhG2 NHDF-Ad_Adult_Dermal_Fibroblasts human	NHDF-Ad_Adult_Dermal_Fibroblasts	NA	human	SKIN	PrimaryCulture	8_EnhG2_E126.bed	1	3603
hyper	21	chromHMM_state8_EnhG2	0	0.609669	255	91	67	27	91	61.7	5054	59494	718856	chromHMM_state8_EnhG2 CD3_Primary_Cells_Peripheral_UW human	CD3_Primary_Cells_Peripheral_UW	NA	human	BLOOD	PrimaryCell	8_EnhG2_E034.bed	1	4339
hyper	26	chromHMM_state8_EnhG2	0	0.550029	310	91	75	20	91	62	6800	59439	717110	chromHMM_state8_EnhG2 CD4+_CD25-_IL17-_PMA-Ionomycin_stimulated_MACS_purified_Th	CD4+_CD25-_IL17-_PMA-Ionomycin_stimulated_MACS_purified_Th_Primary_Cells	NA	human	BLOOD	PrimaryCell	8_EnhG2_E041.bed	1	7046
hyper	27	chromHMM_state8_EnhG2	0	0.425732	267	91	91	24	91	68.7	7553	59482	716357	chromHMM_state8_EnhG2 CD4+_CD25-_IL17+_PMA-Ionomcyin_stimulated_Th17_Primary_Cel	CD4+_CD25-_IL17+_PMA-Ionomcyin_stimulated_Th17_Primary_Cells	NA	human	BLOOD	PrimaryCell	8_EnhG2_E042.bed	1	3662
hyper	34	chromHMM_state8_EnhG2	0	0.502141	224	91	84	35	91	70	5385	59525	718525	chromHMM_state8_EnhG2 Chondrocytes_from_Bone_Marrow_Derived_Mesenchymal_Stem_Cel	Chondrocytes_from_Bone_Marrow_Derived_Mesenchymal_Stem_Cell_Cultured_Cells	NA	human	STROMAL_CONNECTIVE	PrimaryCulture	8_EnhG2_E049.bed	1	6511
hyper	85	chromHMM_state8_EnhG2	0	0.502334	223	91	83	36	91	70	5359	59526	718551	chromHMM_state8_EnhG2 GM12878_Lymphoblastoid human	GM12878_Lymphoblastoid	NA	human	BLOOD	PrimaryCulture	8_EnhG2_E116.bed	1	6903
hyper	29	chromHMM_state8_EnhG2	0	0.489772	153	91	86	52	91	76.3	3775	59596	720135	chromHMM_state8_EnhG2 CD4+_CD25+_CD127-_Treg_Primary_Cells human	CD4+_CD25+_CD127-_Treg_Primary_Cells	NA	human	BLOOD	PrimaryCell	8_EnhG2_E044.bed	1	3539
hyper	24	chromHMM_state8_EnhG2	0	0.371399	119	91	94	61	94	82	3869	59630	720041	chromHMM_state8_EnhG2 CD4+_CD25-_CD45RA+_Naive_Primary_Cells human	CD4+_CD25-_CD45RA+_Naive_Primary_Cells	NA	human	BLOOD	PrimaryCell	8_EnhG2_E039.bed	1	2989
hyper	86	chromHMM_state8_EnhG2	0	0.468492	101	91	89	66	91	82	2607	59648	721303	chromHMM_state8_EnhG2 HeLa-S3_Cervical_Carcinoma human	HeLa-S3_Cervical_Carcinoma	NA	human	CERVIX	CellLine	8_EnhG2_E117.bed	1	2783
hyper	82	chromHMM_state9_EnhA1	207.325	1.80842	3745	1	10	3	10	4.67	25813	56004	698097	chromHMM_state9_EnhA1 Spleen human	Spleen	NA	human	SPLEEN	PrimaryTissue	9_EnhA1_E113.bed	4.64068e-206	26175
hyper	7	chromHMM_state9_EnhA1	199.746	2.30008	1930	2	1	41	41	14.7	10355	57819	713555	chromHMM_state9_EnhA1 hESC_Derived_CD184+_Endoderm_Cultured_Cells human	hESC_Derived_CD184+_Endoderm_Cultured_Cells	NA	human	ESC_DERIVED	ESCDerived	9_EnhA1_E011.bed	8.79609e-199	18091
hyper	67	chromHMM_state9_EnhA1	194.153	1.82897	3372	3	7	6	7	5.33	22923	56377	700987	chromHMM_state9_EnhA1 Lung human	Lung	NA	human	LUNG	PrimaryTissue	9_EnhA1_E096.bed	2.29513e-193	31058
hyper	9	chromHMM_state9_EnhA1	170.811	1.82691	2959	4	8	10	10	7.33	20073	56790	703837	chromHMM_state9_EnhA1 hESC_Derived_CD56+_Mesoderm_Cultured_Cells human	hESC_Derived_CD56+_Mesoderm_Cultured_Cells	NA	human	ESC_DERIVED	ESCDerived	9_EnhA1_E013.bed	3.7901e-170	31550
hyper	63	chromHMM_state9_EnhA1	160.336	1.68759	3620	5	16	4	16	8.33	26647	56129	697263	chromHMM_state9_EnhA1 Fetal_Stomach human	Fetal_Stomach	NA	human	GI_STOMACH	PrimaryTissue	9_EnhA1_E092.bed	9.05119e-160	35079
hyper	3	chromHMM_state9_EnhA1	157.863	1.85999	2581	6	6	16	16	9.33	17156	57168	706754	chromHMM_state9_EnhA1 H1_BMP4_Derived_Trophoblast_Cultured_Cells human	H1_BMP4_Derived_Trophoblast_Cultured_Cells	NA	human	ESC_DERIVED	ESCDerived	9_EnhA1_E005.bed	2.23771e-157	29688
hyper	64	chromHMM_state9_EnhA1	157.433	1.82594	2722	7	9	13	13	9.67	18441	57027	705469	chromHMM_state9_EnhA1 Fetal_Thymus human	Fetal_Thymus	NA	human	THYMUS	PrimaryTissue	9_EnhA1_E093.bed	5.1637e-157	27095
hyper	8	chromHMM_state9_EnhA1	132.446	2.12342	1514	8	3	56	56	22.3	8756	58235	715154	chromHMM_state9_EnhA1 hESC_Derived_CD56+_Ectoderm_Cultured_Cells human	hESC_Derived_CD56+_Ectoderm_Cultured_Cells	NA	human	ESC_DERIVED	ESCDerived	9_EnhA1_E012.bed	4.39066e-132	15121
hyper	62	chromHMM_state9_EnhA1	132.311	1.56348	4012	9	20	1	20	10	31861	55737	692049	chromHMM_state9_EnhA1 Fetal_Placenta human	Fetal_Placenta	NA	human	PLACENTA	PrimaryTissue	9_EnhA1_E091.bed	5.32424e-132	41811
hyper	61	chromHMM_state9_EnhA1	125.158	1.54285	4012	10	21	1	21	10.7	32268	55737	691642	chromHMM_state9_EnhA1 Fetal_Muscle_Leg human	Fetal_Muscle_Leg	NA	human	MUSCLE_LEG	PrimaryTissue	9_EnhA1_E090.bed	6.81804e-125	44075
hyper	17	chromHMM_state9_EnhA1	110.403	2.03175	1399	11	5	60	60	25.3	8443	58350	715467	chromHMM_state9_EnhA1 iPS_DF_19.11_Cell_Line human	iPS_DF_19.11_Cell_Line	NA	human	IPSC	PrimaryCulture	9_EnhA1_E022.bed	3.52515e-110	15622
hyper	1	chromHMM_state9_EnhA1	101.721	1.7826	1865	12	13	44	44	23	12852	57884	711058	chromHMM_state9_EnhA1 H1_Cell_Line human	H1_Cell_Line	NA	human	ESC	PrimaryCulture	9_EnhA1_E003.bed	1.55419e-101	25261
hyper	60	chromHMM_state9_EnhA1	100.927	1.79549	1808	13	11	46	46	23.3	12366	57941	711544	chromHMM_state9_EnhA1 Fetal_Muscle_Trunk human	Fetal_Muscle_Trunk	NA	human	MUSCLE	PrimaryTissue	9_EnhA1_E089.bed	8.91871e-101	17431
hyper	5	chromHMM_state9_EnhA1	89.7596	2.164	972	14	2	78	78	31.3	5490	58777	718420	chromHMM_state9_EnhA1 H1_Derived_Neuronal_Progenitor_Cultured_Cells human	H1_Derived_Neuronal_Progenitor_Cultured_Cells	NA	human	ESC_DERIVED	ESCDerived	9_EnhA1_E007.bed	1.21764e-89	10084
hyper	2	chromHMM_state9_EnhA1	78.9531	1.78283	1434	15	12	58	58	28.3	9849	58315	714061	chromHMM_state9_EnhA1 H1_BMP4_Derived_Mesendoderm_Cultured_Cells human	H1_BMP4_Derived_Mesendoderm_Cultured_Cells	NA	human	ESC_DERIVED	ESCDerived	9_EnhA1_E004.bed	7.27857e-79	24364
hyper	10	chromHMM_state9_EnhA1	77.5018	1.57995	2181	16	18	28	28	20.7	16952	57568	706958	chromHMM_state9_EnhA1 HUES48_Cell_Line human	HUES48_Cell_Line	NA	human	ESC	PrimaryCulture	9_EnhA1_E014.bed	1.92876e-77	37311
hyper	4	chromHMM_state9_EnhA1	73.3418	1.57969	2060	17	19	34	34	23.3	16002	57689	707908	chromHMM_state9_EnhA1 H1_Derived_Mesenchymal_Stem_Cells human	H1_Derived_Mesenchymal_Stem_Cells	NA	human	ESC_DERIVED	ESCDerived	9_EnhA1_E006.bed	2.62437e-73	25570
hyper	19	chromHMM_state9_EnhA1	68.161	1.4952	2438	18	23	21	23	20.7	20026	57311	703884	chromHMM_state9_EnhA1 CD14_Primary_Cells human	CD14_Primary_Cells	NA	human	BLOOD	PrimaryCell	9_EnhA1_E029.bed	3.75754e-68	28125
hyper	77	chromHMM_state9_EnhA1	67.4786	1.49027	2451	19	25	20	25	21.3	20199	57298	703711	chromHMM_state9_EnhA1 Sigmoid_Colon human	Sigmoid_Colon	NA	human	GI_COLON	PrimaryTissue	9_EnhA1_E106.bed	1.71362e-67	29499
hyper	66	chromHMM_state9_EnhA1	66.5186	1.43027	2984	20	31	8	31	19.7	25663	56765	698247	chromHMM_state9_EnhA1 Left_Ventricle human	Left_Ventricle	NA	human	HEART	PrimaryTissue	9_EnhA1_E095.bed	1.48456e-66	40710
hyper	75	chromHMM_state9_EnhA1	63.1048	1.45773	2550	21	28	18	28	22.3	21482	57199	702428	chromHMM_state9_EnhA1 Right_Atrium human	Right_Atrium	NA	human	HEART	PrimaryTissue	9_EnhA1_E104.bed	3.66634e-63	35739
hyper	57	chromHMM_state9_EnhA1	59.672	1.38597	3187	22	39	7	39	22.7	28280	56562	695630	chromHMM_state9_EnhA1 Fetal_Intestine_Large human	Fetal_Intestine_Large	NA	human	GI_INTESTINE	PrimaryTissue	9_EnhA1_E084.bed	9.47969e-60	45288
hyper	81	chromHMM_state9_EnhA1	58.0132	1.69479	1234	23	15	66	66	34.7	8897	58515	715013	chromHMM_state9_EnhA1 Thymus human	Thymus	NA	human	THYMUS	PrimaryTissue	9_EnhA1_E112.bed	4.1329e-58	16467
hyper	56	chromHMM_state9_EnhA1	57.1572	1.35333	3540	24	42	5	42	23.7	32190	56209	691720	chromHMM_state9_EnhA1 Fetal_Adrenal_Gland human	Fetal_Adrenal_Gland	NA	human	ADRENAL	PrimaryTissue	9_EnhA1_E080.bed	2.84305e-57	49996
hyper	76	chromHMM_state9_EnhA1	56.492	1.49051	2031	25	24	36	36	28.3	16696	57718	707214	chromHMM_state9_EnhA1 Right_Ventricle human	Right_Ventricle	NA	human	HEART	PrimaryTissue	9_EnhA1_E105.bed	1.26269e-56	24491
hyper	70	chromHMM_state9_EnhA1	54.4722	1.74483	1047	26	14	72	72	37.3	7325	58702	716585	chromHMM_state9_EnhA1 Placenta_Amnion human	Placenta_Amnion	NA	human	PLACENTA	PrimaryTissue	9_EnhA1_E099.bed	1.27087e-54	14299
hyper	58	chromHMM_state9_EnhA1	48.9532	1.37229	2741	27	41	12	41	26.7	24505	57008	699405	chromHMM_state9_EnhA1 Fetal_Intestine_Small human	Fetal_Intestine_Small	NA	human	GI_INTESTINE	PrimaryTissue	9_EnhA1_E085.bed	4.04285e-49	42152
hyper	68	chromHMM_state9_EnhA1	47.4474	1.4661	1833	28	27	45	45	33.3	15297	57916	708613	chromHMM_state9_EnhA1 Ovary human	Ovary	NA	human	OVARY	PrimaryTissue	9_EnhA1_E097.bed	1.24929e-47	26440
hyper	35	chromHMM_state9_EnhA1	42.6783	1.50773	1433	29	22	59	59	36.7	11609	58316	712301	chromHMM_state9_EnhA1 Mobilized_CD34_Primary_Cells_Female human	Mobilized_CD34_Primary_Cells_Female	NA	human	BLOOD	PrimaryCell	9_EnhA1_E050.bed	7.08873e-43	24458
hyper	50	chromHMM_state9_EnhA1	41.9842	1.40519	2021	30	33	37	37	33.3	17597	57728	706313	chromHMM_state9_EnhA1 Brain_Mid_Frontal_Lobe human	Brain_Mid_Frontal_Lobe	NA	human	BRAIN	PrimaryTissue	9_EnhA1_E073.bed	3.38761e-42	29753
hyper	55	chromHMM_state9_EnhA1	40.175	1.42994	1751	31	32	49	49	37.3	14968	57998	708942	chromHMM_state9_EnhA1 Esophagus human	Esophagus	NA	human	GI_ESOPHAGUS	PrimaryTissue	9_EnhA1_E079.bed	2.11286e-40	21925
hyper	12	chromHMM_state9_EnhA1	39.3126	1.47732	1448	32	26	57	57	38.3	11969	58301	711941	chromHMM_state9_EnhA1 HUES64_Cell_Line human	HUES64_Cell_Line	NA	human	ESC	PrimaryCulture	9_EnhA1_E016.bed	1.49095e-39	27717
hyper	65	chromHMM_state9_EnhA1	33.7943	1.63757	796	33	17	85	85	45	5920	58953	717990	chromHMM_state9_EnhA1 Gastric human	Gastric	NA	human	GI_STOMACH	PrimaryTissue	9_EnhA1_E094.bed	4.76874e-34	9726
hyper	22	chromHMM_state9_EnhA1	30.2107	1.35311	1790	34	43	48	48	41.7	16154	57959	707756	chromHMM_state9_EnhA1 CD4_Memory_Primary_Cells human	CD4_Memory_Primary_Cells	NA	human	BLOOD	PrimaryCell	9_EnhA1_E037.bed	1.77441e-30	27213
hyper	52	chromHMM_state9_EnhA1	30.0915	1.43731	1255	35	30	63	63	42.7	10647	58494	713263	chromHMM_state9_EnhA1 Colonic_Mucosa human	Colonic_Mucosa	NA	human	GI_COLON	PrimaryTissue	9_EnhA1_E075.bed	2.26815e-30	18759
hyper	79	chromHMM_state9_EnhA1	28.6677	1.3759	1525	36	40	55	55	43.7	13523	58224	710387	chromHMM_state9_EnhA1 Small_Intestine human	Small_Intestine	NA	human	GI_INTESTINE	PrimaryTissue	9_EnhA1_E109.bed	5.8505e-29	21830
hyper	16	chromHMM_state9_EnhA1	28.5058	2.10834	316	37	4	97	97	46	1821	59433	722089	chromHMM_state9_EnhA1 iPS_DF_6.9_Cell_Line human	iPS_DF_6.9_Cell_Line	NA	human	IPSC	PrimaryCulture	9_EnhA1_E021.bed	8.26507e-29	4515
hyper	51	chromHMM_state9_EnhA1	27.1153	1.2699	2535	38	50	19	50	35.7	24406	57214	699504	chromHMM_state9_EnhA1 Brain_Substantia_Nigra human	Brain_Substantia_Nigra	NA	human	BRAIN	PrimaryTissue	9_EnhA1_E074.bed	1.97762e-27	40305
hyper	69	chromHMM_state9_EnhA1	25.998	1.45676	1003	39	29	74	74	47.3	8386	58746	715524	chromHMM_state9_EnhA1 Pancreas human	Pancreas	NA	human	PANCREAS	PrimaryTissue	9_EnhA1_E098.bed	2.52429e-26	12801
hyper	13	chromHMM_state9_EnhA1	24.2776	1.23571	2866	40	56	11	56	35.7	28360	56883	695550	chromHMM_state9_EnhA1 IMR90_Cell_Line human	IMR90_Cell_Line	NA	human	LUNG	CellLine	9_EnhA1_E017.bed	1.29305e-24	49240
hyper	44	chromHMM_state9_EnhA1	23.1623	1.22412	2984	41	60	8	60	36.3	29807	56765	694103	chromHMM_state9_EnhA1 Adult_Liver human	Adult_Liver	NA	human	LIVER	PrimaryTissue	9_EnhA1_E066.bed	1.6449e-23	45010
hyper	40	chromHMM_state9_EnhA1	22.8004	1.28794	1875	42	49	43	49	44.7	17763	57874	706147	chromHMM_state9_EnhA1 Penis_Foreskin_Melanocyte_Primary_Cells_skin03 human	Penis_Foreskin_Melanocyte_Primary_Cells_skin03	NA	human	SKIN	PrimaryCulture	9_EnhA1_E061.bed	3.69432e-23	34799
hyper	48	chromHMM_state9_EnhA1	22.7039	1.24078	2562	43	55	17	55	38.3	25227	57187	698683	chromHMM_state9_EnhA1 Brain_Hippocampus_Middle human	Brain_Hippocampus_Middle	NA	human	BRAIN	PrimaryTissue	9_EnhA1_E071.bed	4.5067e-23	43708
hyper	71	chromHMM_state9_EnhA1	21.7968	1.34612	1305	44	44	62	62	50	11812	58444	712098	chromHMM_state9_EnhA1 Psoas_Muscle human	Psoas_Muscle	NA	human	MUSCLE	PrimaryTissue	9_EnhA1_E100.bed	3.55592e-22	22804
hyper	73	chromHMM_state9_EnhA1	21.7612	1.26929	2004	45	51	38	51	44.7	19266	57745	704644	chromHMM_state9_EnhA1 Rectal_Mucosa.Donor_31 human	Rectal_Mucosa.Donor_31	NA	human	GI_RECTUM	PrimaryTissue	9_EnhA1_E102.bed	3.77377e-22	34729
hyper	72	chromHMM_state9_EnhA1	21.5393	1.33963	1330	46	45	61	61	50.7	12097	58419	711813	chromHMM_state9_EnhA1 Rectal_Mucosa.Donor_29 human	Rectal_Mucosa.Donor_29	NA	human	GI_RECTUM	PrimaryTissue	9_EnhA1_E101.bed	6.15375e-22	24310
hyper	92	chromHMM_state9_EnhA1	20.9975	1.39702	1000	47	34	75	75	52	8714	58749	715196	chromHMM_state9_EnhA1 K562_Leukemia human	K562_Leukemia	NA	human	BLOOD	PrimaryCulture	9_EnhA1_E123.bed	2.09698e-21	22605
hyper	46	chromHMM_state9_EnhA1	20.5178	1.24315	2253	48	53	24	53	41.7	22121	57496	701789	chromHMM_state9_EnhA1 Brain_Anterior_Caudate human	Brain_Anterior_Caudate	NA	human	BRAIN	PrimaryTissue	9_EnhA1_E068.bed	6.19739e-21	42664
hyper	31	chromHMM_state9_EnhA1	19.2318	1.24249	2109	49	54	31	54	44.7	20708	57640	703202	chromHMM_state9_EnhA1 CD56_Primary_Cells human	CD56_Primary_Cells	NA	human	BLOOD	PrimaryCell	9_EnhA1_E046.bed	1.17285e-19	27703
hyper	78	chromHMM_state9_EnhA1	18.6176	1.23397	2170	50	57	29	57	45.3	21454	57579	702456	chromHMM_state9_EnhA1 Skeletal_Muscle_Female human	Skeletal_Muscle_Female	NA	human	MUSCLE	PrimaryTissue	9_EnhA1_E108.bed	4.72756e-19	39918
hyper	47	chromHMM_state9_EnhA1	18.5528	1.22974	2234	51	59	25	59	45	22165	57515	701745	chromHMM_state9_EnhA1 Brain_Cingulate_Gyrus human	Brain_Cingulate_Gyrus	NA	human	BRAIN	PrimaryTissue	9_EnhA1_E069.bed	5.38084e-19	39523
hyper	53	chromHMM_state9_EnhA1	18.2434	1.26239	1731	52	52	50	52	51.3	16714	58018	707196	chromHMM_state9_EnhA1 Colon_Smooth_Muscle human	Colon_Smooth_Muscle	NA	human	GI_COLON	PrimaryTissue	9_EnhA1_E076.bed	1.07613e-18	29348
hyper	33	chromHMM_state9_EnhA1	16.6592	1.39353	791	53	36	86	86	58.3	6903	58958	717007	chromHMM_state9_EnhA1 CD8_Memory_Primary_Cells human	CD8_Memory_Primary_Cells	NA	human	BLOOD	PrimaryCell	9_EnhA1_E048.bed	4.05315e-17	12049
hyper	45	chromHMM_state9_EnhA1	16.2187	1.23165	1898	54	58	42	58	51.3	18783	57851	705127	chromHMM_state9_EnhA1 Brain_Angular_Gyrus human	Brain_Angular_Gyrus	NA	human	BRAIN	PrimaryTissue	9_EnhA1_E067.bed	1.09682e-16	33502
hyper	49	chromHMM_state9_EnhA1	15.6109	1.216	2064	55	62	33	62	50	20692	57685	703218	chromHMM_state9_EnhA1 Brain_Inferior_Temporal_Lobe human	Brain_Inferior_Temporal_Lobe	NA	human	BRAIN	PrimaryTissue	9_EnhA1_E072.bed	4.36509e-16	38094
hyper	84	chromHMM_state9_EnhA1	14.3044	1.29004	1115	56	48	70	70	58	10516	58634	713394	chromHMM_state9_EnhA1 Dnd41_TCell_Leukemia human	Dnd41_TCell_Leukemia	NA	human	BLOOD	CellLine	9_EnhA1_E115.bed	8.68325e-15	23510
hyper	11	chromHMM_state9_EnhA1	13.0865	1.33826	780	57	46	87	87	63.3	7085	58969	716825	chromHMM_state9_EnhA1 HUES6_Cell_Line human	HUES6_Cell_Line	NA	human	ESC	PrimaryCulture	9_EnhA1_E015.bed	1.40878e-13	19237
hyper	21	chromHMM_state9_EnhA1	12.4116	1.21855	1566	58	61	54	61	57.7	15644	58183	708266	chromHMM_state9_EnhA1 CD3_Primary_Cells_Peripheral_UW human	CD3_Primary_Cells_Peripheral_UW	NA	human	BLOOD	PrimaryCell	9_EnhA1_E034.bed	6.54935e-13	24843
hyper	91	chromHMM_state9_EnhA1	11.3836	1.15671	2622	59	70	15	70	48	27628	57127	696282	chromHMM_state9_EnhA1 HUVEC_Umbilical_Vein_Endothelial_Cells human	HUVEC_Umbilical_Vein_Endothelial_Cells	NA	human	VASCULAR	PrimaryCulture	9_EnhA1_E122.bed	6.86775e-12	40618
hyper	39	chromHMM_state9_EnhA1	11.0599	1.29386	821	60	47	84	84	63.7	7712	58928	716198	chromHMM_state9_EnhA1 Penis_Foreskin_Melanocyte_Primary_Cells_skin01 human	Penis_Foreskin_Melanocyte_Primary_Cells_skin01	NA	human	SKIN	PrimaryCulture	9_EnhA1_E059.bed	1.42276e-11	16944
hyper	15	chromHMM_state9_EnhA1	11.0213	1.39064	510	61	37	92	92	63.3	4454	59239	719456	chromHMM_state9_EnhA1 iPS-20b_Cell_Line human	iPS-20b_Cell_Line	NA	human	IPSC	PrimaryCulture	9_EnhA1_E020.bed	1.52949e-11	14671
hyper	20	chromHMM_state9_EnhA1	10.9746	1.20082	1589	62	65	53	65	60	16104	58160	707806	chromHMM_state9_EnhA1 CD19_Primary_Cells_Peripheral_UW human	CD19_Primary_Cells_Peripheral_UW	NA	human	BLOOD	PrimaryCell	9_EnhA1_E032.bed	1.67584e-11	22161
hyper	74	chromHMM_state9_EnhA1	10.9659	1.19335	1701	63	68	51	68	60.7	17350	58048	706560	chromHMM_state9_EnhA1 Rectal_Smooth_Muscle human	Rectal_Smooth_Muscle	NA	human	GI_RECTUM	PrimaryTissue	9_EnhA1_E103.bed	1.68266e-11	29459
hyper	14	chromHMM_state9_EnhA1	10.5465	1.39507	477	64	35	93	93	64	4152	59272	719758	chromHMM_state9_EnhA1 iPS-18_Cell_Line human	iPS-18_Cell_Line	NA	human	IPSC	PrimaryCulture	9_EnhA1_E019.bed	4.35031e-11	11954
hyper	6	chromHMM_state9_EnhA1	9.84573	1.38641	458	65	38	94	94	65.7	4011	59291	719899	chromHMM_state9_EnhA1 H9_Cell_Line human	H9_Cell_Line	NA	human	ESC	PrimaryCulture	9_EnhA1_E008.bed	2.15071e-10	11117
hyper	80	chromHMM_state9_EnhA1	9.03708	1.21345	1143	66	63	69	69	66	11451	58606	712459	chromHMM_state9_EnhA1 Stomach_Smooth_Muscle human	Stomach_Smooth_Muscle	NA	human	GI_STOMACH	PrimaryTissue	9_EnhA1_E111.bed	1.36333e-09	27076
hyper	24	chromHMM_state9_EnhA1	8.78182	1.20047	1238	67	66	65	67	66	12538	58511	711372	chromHMM_state9_EnhA1 CD4+_CD25-_CD45RA+_Naive_Primary_Cells human	CD4+_CD25-_CD45RA+_Naive_Primary_Cells	NA	human	BLOOD	PrimaryCell	9_EnhA1_E039.bed	2.41729e-09	24524
hyper	26	chromHMM_state9_EnhA1	8.50941	1.16709	1665	68	69	52	69	63	17354	58084	706556	chromHMM_state9_EnhA1 CD4+_CD25-_IL17-_PMA-Ionomycin_stimulated_MACS_purified_Th	CD4+_CD25-_IL17-_PMA-Ionomycin_stimulated_MACS_purified_Th_Primary_Cells	NA	human	BLOOD	PrimaryCell	9_EnhA1_E041.bed	4.45975e-09	35412
hyper	54	chromHMM_state9_EnhA1	6.96179	1.19749	973	69	67	77	77	71	9871	58776	714039	chromHMM_state9_EnhA1 Duodenum_Smooth_Muscle human	Duodenum_Smooth_Muscle	NA	human	GI_DUODENUM	PrimaryTissue	9_EnhA1_E078.bed	1.55089e-07	20401
hyper	90	chromHMM_state9_EnhA1	4.87802	1.09135	2703	70	76	14	76	53.3	30121	57046	693789	chromHMM_state9_EnhA1 HSMMtube_Skeletal_Muscle_Myotubes_Derived_from_HSMM human	HSMMtube_Skeletal_Muscle_Myotubes_Derived_from_HSMM	NA	human	MUSCLE	PrimaryCulture	9_EnhA1_E121.bed	1.85401e-05	51245
hyper	42	chromHMM_state9_EnhA1	4.58419	1.1014	2039	71	75	35	75	60.3	22500	57710	701410	chromHMM_state9_EnhA1 Adipose_Nuclei human	Adipose_Nuclei	NA	human	FAT	PrimaryTissue	9_EnhA1_E063.bed	3.59566e-05	40559
hyper	41	chromHMM_state9_EnhA1	3.95918	1.21013	442	72	64	95	95	77	4431	59307	719479	chromHMM_state9_EnhA1 Peripheral_Blood_Mononuclear_Primary_Cells human	Peripheral_Blood_Mononuclear_Primary_Cells	NA	human	BLOOD	PrimaryCell	9_EnhA1_E062.bed	0.000149526	7912
hyper	43	chromHMM_state9_EnhA1	3.4756	1.15146	675	73	71	91	91	78.3	7113	59074	716797	chromHMM_state9_EnhA1 Aorta human	Aorta	NA	human	VASCULAR	PrimaryTissue	9_EnhA1_E065.bed	0.000449054	17749
hyper	30	chromHMM_state9_EnhA1	3.30595	1.12457	908	74	73	80	80	75.7	9799	58841	714111	chromHMM_state9_EnhA1 CD4+_CD25int_CD127+_Tmem_Primary_Cells human	CD4+_CD25int_CD127+_Tmem_Primary_Cells	NA	human	BLOOD	PrimaryCell	9_EnhA1_E045.bed	0.000654707	16895
hyper	28	chromHMM_state9_EnhA1	3.05764	1.13196	736	75	72	88	88	78.3	7889	59013	716021	chromHMM_state9_EnhA1 CD4+_CD25-_Th_Primary_Cells human	CD4+_CD25-_Th_Primary_Cells	NA	human	BLOOD	PrimaryCell	9_EnhA1_E043.bed	0.00114425	13027
hyper	85	chromHMM_state9_EnhA1	2.73936	1.10752	931	76	74	79	79	76.3	10200	58818	713710	chromHMM_state9_EnhA1 GM12878_Lymphoblastoid human	GM12878_Lymphoblastoid	NA	human	BLOOD	PrimaryCulture	9_EnhA1_E116.bed	0.00234989	30682
hyper	97	chromHMM_state9_EnhA1	2.31235	1.06403	1998	77	77	39	77	64.3	22797	57751	701113	chromHMM_state9_EnhA1 NHLF_Lung_Fibroblasts human	NHLF_Lung_Fibroblasts	NA	human	LUNG	PrimaryCulture	9_EnhA1_E128.bed	0.00619994	34443
hyper	93	chromHMM_state9_EnhA1	0.817549	1.03164	1241	78	78	64	78	73.3	14584	58508	709326	chromHMM_state9_EnhA1 Monocytes-CD14+_RO01746 human	Monocytes-CD14+_RO01746	NA	human	BLOOD	PrimaryCell	9_EnhA1_E124.bed	0.191242	43511
hyper	25	chromHMM_state9_EnhA1	0.523	1.01632	1217	79	79	67	79	75	14513	58532	709397	chromHMM_state9_EnhA1 CD4+_CD25-_CD45RO+_Memory_Primary_Cells human	CD4+_CD25-_CD45RO+_Memory_Primary_Cells	NA	human	BLOOD	PrimaryCell	9_EnhA1_E040.bed	0.372048	18827
hyper	95	chromHMM_state9_EnhA1	0.508387	1.0116	2151	80	81	30	81	63.7	25773	57598	698137	chromHMM_state9_EnhA1 NHDF-Ad_Adult_Dermal_Fibroblasts human	NHDF-Ad_Adult_Dermal_Fibroblasts	NA	human	SKIN	PrimaryCulture	9_EnhA1_E126.bed	0.37997	43483
hyper	29	chromHMM_state9_EnhA1	0.450679	1.01426	825	81	80	83	83	81.3	9857	58924	714053	chromHMM_state9_EnhA1 CD4+_CD25+_CD127-_Treg_Primary_Cells human	CD4+_CD25+_CD127-_Treg_Primary_Cells	NA	human	BLOOD	PrimaryCell	9_EnhA1_E044.bed	0.42861	20243
hyper	32	chromHMM_state9_EnhA1	0.316868	1.00238	686	82	82	89	89	84.3	8292	59063	715618	chromHMM_state9_EnhA1 CD8_Naive_Primary_Cells human	CD8_Naive_Primary_Cells	NA	human	BLOOD	PrimaryCell	9_EnhA1_E047.bed	0.576161	14407
hyper	37	chromHMM_state9_EnhA1	0.283183	0.998478	686	83	83	89	89	85	8324	59063	715586	chromHMM_state9_EnhA1 Penis_Foreskin_Fibroblast_Primary_Cells_skin02 human	Penis_Foreskin_Fibroblast_Primary_Cells_skin02	NA	human	SKIN	PrimaryCulture	9_EnhA1_E056.bed	0.615127	20467
hyper	94	chromHMM_state9_EnhA1	0.247554	0.996614	2414	84	84	22	84	63.3	29343	57335	694567	chromHMM_state9_EnhA1 NH-A_Astrocytes human	NH-A_Astrocytes	NA	human	BRAIN	PrimaryCulture	9_EnhA1_E125.bed	0.659771	46520
hyper	23	chromHMM_state9_EnhA1	0.193082	0.981279	353	85	85	96	96	88.7	4358	59396	719552	chromHMM_state9_EnhA1 CD4_Naive_Primary_Cells human	CD4_Naive_Primary_Cells	NA	human	BLOOD	PrimaryCell	9_EnhA1_E038.bed	0.739137	8939
hyper	59	chromHMM_state9_EnhA1	0.0283074	0.901221	219	86	92	98	98	92	2943	59530	720967	chromHMM_state9_EnhA1 Pancreatic_Islets human	Pancreatic_Islets	NA	human	PANCREAS	PrimaryTissue	9_EnhA1_E087.bed	1	9848
hyper	83	chromHMM_state9_EnhA1	0.0176483	0.943991	984	87	87	76	87	83.3	12617	58765	711293	chromHMM_state9_EnhA1 A549_EtOH_0.02pct_Lung_Carcinoma human	A549_EtOH_0.02pct_Lung_Carcinoma	NA	human	LUNG	CellLine	9_EnhA1_E114.bed	1	34704
hyper	89	chromHMM_state9_EnhA1	0.0135053	0.956984	1981	88	86	40	88	71.3	25043	57768	698867	chromHMM_state9_EnhA1 HSMM_Skeletal_Muscle_Myoblasts human	HSMM_Skeletal_Muscle_Myoblasts	NA	human	MUSCLE	PrimaryCulture	9_EnhA1_E120.bed	1	42949
hyper	27	chromHMM_state9_EnhA1	0.00313609	0.917187	845	89	90	82	90	87	11148	58904	712762	chromHMM_state9_EnhA1 CD4+_CD25-_IL17+_PMA-Ionomcyin_stimulated_Th17_Primary_Cel	CD4+_CD25-_IL17+_PMA-Ionomcyin_stimulated_Th17_Primary_Cells	NA	human	BLOOD	PrimaryCell	9_EnhA1_E042.bed	1	22454
hyper	36	chromHMM_state9_EnhA1	0.00260483	0.921898	1013	90	88	73	90	83.7	13294	58736	710616	chromHMM_state9_EnhA1 Penis_Foreskin_Fibroblast_Primary_Cells_skin01 human	Penis_Foreskin_Fibroblast_Primary_Cells_skin01	NA	human	SKIN	PrimaryCulture	9_EnhA1_E055.bed	1	34178
hyper	87	chromHMM_state9_EnhA1	0.000501139	0.898416	849	91	93	81	93	88.3	11431	58900	712479	chromHMM_state9_EnhA1 HepG2_Hepatocellular_Carcinoma human	HepG2_Hepatocellular_Carcinoma	NA	human	LIVER	CellLine	9_EnhA1_E118.bed	1	25972
hyper	38	chromHMM_state9_EnhA1	0.000202124	0.905238	1172	92	91	68	92	83.7	15654	58577	708256	chromHMM_state9_EnhA1 Penis_Foreskin_Keratinocyte_Primary_Cells_skin03 human	Penis_Foreskin_Keratinocyte_Primary_Cells_skin03	NA	human	SKIN	PrimaryCulture	9_EnhA1_E058.bed	1	32553
hyper	18	chromHMM_state9_EnhA1	3.92344e-05	0.9213	2276	93	89	23	93	68.3	29834	57473	694076	chromHMM_state9_EnhA1 Bone_Marrow_Derived_Mesenchymal_Stem_Cell_Cultured_Cells h	Bone_Marrow_Derived_Mesenchymal_Stem_Cell_Cultured_Cells	NA	human	STROMAL_CONNECTIVE	PrimaryCulture	9_EnhA1_E026.bed	1	60372
hyper	86	chromHMM_state9_EnhA1	3.88389e-08	0.8503	1075	94	95	71	95	86.7	15269	58674	708641	chromHMM_state9_EnhA1 HeLa-S3_Cervical_Carcinoma human	HeLa-S3_Cervical_Carcinoma	NA	human	CERVIX	CellLine	9_EnhA1_E117.bed	1	31421
hyper	88	chromHMM_state9_EnhA1	1.0273e-08	0.883181	2073	95	94	32	95	73.7	28308	57676	695602	chromHMM_state9_EnhA1 HMEC_Mammary_Epithelial human	HMEC_Mammary_Epithelial	NA	human	BREAST	PrimaryCulture	9_EnhA1_E119.bed	1	41807
hyper	96	chromHMM_state9_EnhA1	6.12059e-13	0.844359	1793	96	96	47	96	79.7	25586	57956	698324	chromHMM_state9_EnhA1 NHEK-Epidermal_Keratinocytes human	NHEK-Epidermal_Keratinocytes	NA	human	SKIN	PrimaryCulture	9_EnhA1_E127.bed	1	46766
hyper	34	chromHMM_state9_EnhA1	2.12152e-15	0.843134	2182	97	97	27	97	73.7	31143	57567	692767	chromHMM_state9_EnhA1 Chondrocytes_from_Bone_Marrow_Derived_Mesenchymal_Stem_Cel	Chondrocytes_from_Bone_Marrow_Derived_Mesenchymal_Stem_Cell_Cultured_Cells	NA	human	STROMAL_CONNECTIVE	PrimaryCulture	9_EnhA1_E049.bed	1	61924
hyper	98	chromHMM_state9_EnhA1	0	0.816978	2198	98	98	26	98	74	32329	57551	691581	chromHMM_state9_EnhA1 Osteoblasts human	Osteoblasts	NA	human	BONE	PrimaryCulture	9_EnhA1_E129.bed	1	58626
hyper	79	chromHMM_state10_EnhA2	209.707	1.42965	10768	1	12	1	12	4.67	96481	48981	627429	chromHMM_state10_EnhA2 Small_Intestine human	Small_Intestine	NA	human	GI_INTESTINE	PrimaryTissue	10_EnhA2_E109.bed	1.9258e-208	70409
hyper	77	chromHMM_state10_EnhA2	170.142	1.45233	7646	2	9	2	9	4.33	66433	52103	657477	chromHMM_state10_EnhA2 Sigmoid_Colon human	Sigmoid_Colon	NA	human	GI_COLON	PrimaryTissue	10_EnhA2_E106.bed	3.5365e-169	61477
hyper	2	chromHMM_state10_EnhA2	163.648	1.64328	4093	3	6	7	7	5.33	31009	55656	692901	chromHMM_state10_EnhA2 H1_BMP4_Derived_Mesendoderm_Cultured_Cells human	H1_BMP4_Derived_Mesendoderm_Cultured_Cells	NA	human	ESC_DERIVED	ESCDerived	10_EnhA2_E004.bed	7.34154e-163	48787
hyper	67	chromHMM_state10_EnhA2	158.01	1.47379	6483	4	8	3	8	5	55222	53266	668688	chromHMM_state10_EnhA2 Lung human	Lung	NA	human	LUNG	PrimaryTissue	10_EnhA2_E096.bed	2.39579e-157	61576
hyper	22	chromHMM_state10_EnhA2	138.156	1.87685	2188	5	1	25	25	10.3	14371	57561	709539	chromHMM_state10_EnhA2 CD4_Memory_Primary_Cells human	CD4_Memory_Primary_Cells	NA	human	BLOOD	PrimaryCell	10_EnhA2_E037.bed	1.36934e-137	14645
hyper	44	chromHMM_state10_EnhA2	134.651	1.66804	3144	6	5	14	14	8.33	23328	56605	700582	chromHMM_state10_EnhA2 Adult_Liver human	Adult_Liver	NA	human	LIVER	PrimaryTissue	10_EnhA2_E066.bed	3.6444e-134	31303
hyper	33	chromHMM_state10_EnhA2	97.8449	1.71513	2037	7	4	28	28	13	14597	57712	709313	chromHMM_state10_EnhA2 CD8_Memory_Primary_Cells human	CD8_Memory_Primary_Cells	NA	human	BLOOD	PrimaryCell	10_EnhA2_E048.bed	2.00092e-97	12717
hyper	51	chromHMM_state10_EnhA2	82.7258	1.48478	3096	8	7	16	16	10.3	25698	56653	698212	chromHMM_state10_EnhA2 Brain_Substantia_Nigra human	Brain_Substantia_Nigra	NA	human	BRAIN	PrimaryTissue	10_EnhA2_E074.bed	2.30327e-82	43657
hyper	5	chromHMM_state10_EnhA2	79.0149	1.83064	1322	9	2	39	39	16.7	8838	58427	715072	chromHMM_state10_EnhA2 H1_Derived_Neuronal_Progenitor_Cultured_Cells human	H1_Derived_Neuronal_Progenitor_Cultured_Cells	NA	human	ESC_DERIVED	ESCDerived	10_EnhA2_E007.bed	1.05211e-78	15727
hyper	65	chromHMM_state10_EnhA2	77.497	1.41344	3756	10	14	8	14	10.7	32799	55993	691111	chromHMM_state10_EnhA2 Gastric human	Gastric	NA	human	GI_STOMACH	PrimaryTissue	10_EnhA2_E094.bed	3.12035e-77	25379
hyper	55	chromHMM_state10_EnhA2	70.0115	1.34746	4544	11	23	5	23	13	41675	55205	682235	chromHMM_state10_EnhA2 Esophagus human	Esophagus	NA	human	GI_ESOPHAGUS	PrimaryTissue	10_EnhA2_E079.bed	8.67606e-70	49545
hyper	50	chromHMM_state10_EnhA2	66.5886	1.38574	3589	12	16	10	16	12.7	31913	56160	691997	chromHMM_state10_EnhA2 Brain_Mid_Frontal_Lobe human	Brain_Mid_Frontal_Lobe	NA	human	BRAIN	PrimaryTissue	10_EnhA2_E073.bed	2.10616e-66	49732
hyper	45	chromHMM_state10_EnhA2	58.507	1.37137	3332	13	17	11	17	13.7	29889	56417	694021	chromHMM_state10_EnhA2 Brain_Angular_Gyrus human	Brain_Angular_Gyrus	NA	human	BRAIN	PrimaryTissue	10_EnhA2_E067.bed	2.34585e-58	50081
hyper	72	chromHMM_state10_EnhA2	55.8867	1.41142	2670	14	15	19	19	16	23222	57079	700688	chromHMM_state10_EnhA2 Rectal_Mucosa.Donor_29 human	Rectal_Mucosa.Donor_29	NA	human	GI_RECTUM	PrimaryTissue	10_EnhA2_E101.bed	9.0858e-56	37221
hyper	59	chromHMM_state10_EnhA2	52.4042	1.34969	3282	15	21	12	21	16	29887	56467	694023	chromHMM_state10_EnhA2 Pancreatic_Islets human	Pancreatic_Islets	NA	human	PANCREAS	PrimaryTissue	10_EnhA2_E087.bed	2.57608e-52	30610
hyper	48	chromHMM_state10_EnhA2	51.6717	1.42177	2358	16	13	22	22	17	20332	57391	703578	chromHMM_state10_EnhA2 Brain_Hippocampus_Middle human	Brain_Hippocampus_Middle	NA	human	BRAIN	PrimaryTissue	10_EnhA2_E071.bed	1.30451e-51	40334
hyper	9	chromHMM_state10_EnhA2	50.2734	1.44407	2106	17	10	27	27	18	17863	57643	706047	chromHMM_state10_EnhA2 hESC_Derived_CD56+_Mesoderm_Cultured_Cells human	hESC_Derived_CD56+_Mesoderm_Cultured_Cells	NA	human	ESC_DERIVED	ESCDerived	10_EnhA2_E013.bed	3.07178e-50	41006
hyper	71	chromHMM_state10_EnhA2	48.4745	1.34795	3044	18	22	17	22	19	27725	56705	696185	chromHMM_state10_EnhA2 Psoas_Muscle human	Psoas_Muscle	NA	human	MUSCLE	PrimaryTissue	10_EnhA2_E100.bed	1.82562e-48	34626
hyper	73	chromHMM_state10_EnhA2	45.3361	1.43448	1956	19	11	29	29	19.7	16686	57793	707224	chromHMM_state10_EnhA2 Rectal_Mucosa.Donor_31 human	Rectal_Mucosa.Donor_31	NA	human	GI_RECTUM	PrimaryTissue	10_EnhA2_E102.bed	2.37877e-45	30054
hyper	82	chromHMM_state10_EnhA2	45.31	1.24664	5258	20	36	4	36	20	52007	54491	671903	chromHMM_state10_EnhA2 Spleen human	Spleen	NA	human	SPLEEN	PrimaryTissue	10_EnhA2_E113.bed	2.39996e-45	45578
hyper	46	chromHMM_state10_EnhA2	40.572	1.30781	3110	21	28	15	28	21.3	29169	56639	694741	chromHMM_state10_EnhA2 Brain_Anterior_Caudate human	Brain_Anterior_Caudate	NA	human	BRAIN	PrimaryTissue	10_EnhA2_E068.bed	1.25038e-40	56411
hyper	47	chromHMM_state10_EnhA2	38.4202	1.35133	2334	22	20	23	23	21.7	21141	57415	702769	chromHMM_state10_EnhA2 Brain_Cingulate_Gyrus human	Brain_Cingulate_Gyrus	NA	human	BRAIN	PrimaryTissue	10_EnhA2_E069.bed	1.69265e-38	44323
hyper	75	chromHMM_state10_EnhA2	35.8254	1.26169	3631	23	33	9	33	21.7	35313	56118	688597	chromHMM_state10_EnhA2 Right_Atrium human	Right_Atrium	NA	human	HEART	PrimaryTissue	10_EnhA2_E104.bed	6.36872e-36	55296
hyper	52	chromHMM_state10_EnhA2	32.9044	1.26824	3164	24	32	13	32	23	30569	56585	693341	chromHMM_state10_EnhA2 Colonic_Mucosa human	Colonic_Mucosa	NA	human	GI_COLON	PrimaryTissue	10_EnhA2_E075.bed	5.08887e-33	40243
hyper	16	chromHMM_state10_EnhA2	30.041	1.73235	577	25	3	59	59	29	4052	59172	719858	chromHMM_state10_EnhA2 iPS_DF_6.9_Cell_Line human	iPS_DF_6.9_Cell_Line	NA	human	IPSC	PrimaryCulture	10_EnhA2_E021.bed	3.56662e-30	12005
hyper	68	chromHMM_state10_EnhA2	29.6765	1.36468	1664	26	18	34	34	26	14884	58085	709026	chromHMM_state10_EnhA2 Ovary human	Ovary	NA	human	OVARY	PrimaryTissue	10_EnhA2_E097.bed	7.93939e-30	26234
hyper	7	chromHMM_state10_EnhA2	28.5633	1.28225	2478	27	29	21	29	25.7	23630	57271	700280	chromHMM_state10_EnhA2 hESC_Derived_CD184+_Endoderm_Cultured_Cells human	hESC_Derived_CD184+_Endoderm_Cultured_Cells	NA	human	ESC_DERIVED	ESCDerived	10_EnhA2_E011.bed	9.92034e-29	37368
hyper	66	chromHMM_state10_EnhA2	28.4607	1.25246	3012	28	35	18	35	27	29436	56737	694474	chromHMM_state10_EnhA2 Left_Ventricle human	Left_Ventricle	NA	human	HEART	PrimaryTissue	10_EnhA2_E095.bed	1.21174e-28	51744
hyper	76	chromHMM_state10_EnhA2	28.245	1.32138	1954	29	26	30	30	28.3	18060	57795	705850	chromHMM_state10_EnhA2 Right_Ventricle human	Right_Ventricle	NA	human	HEART	PrimaryTissue	10_EnhA2_E105.bed	1.92231e-28	27911
hyper	49	chromHMM_state10_EnhA2	28.065	1.26845	2657	30	31	20	31	27	25620	57092	698290	chromHMM_state10_EnhA2 Brain_Inferior_Temporal_Lobe human	Brain_Inferior_Temporal_Lobe	NA	human	BRAIN	PrimaryTissue	10_EnhA2_E072.bed	2.81276e-28	51158
hyper	81	chromHMM_state10_EnhA2	23.8846	1.3143	1695	31	27	33	33	30.3	15732	58054	708178	chromHMM_state10_EnhA2 Thymus human	Thymus	NA	human	THYMUS	PrimaryTissue	10_EnhA2_E112.bed	4.1234e-24	22031
hyper	78	chromHMM_state10_EnhA2	22.8626	1.32147	1556	32	25	35	35	30.7	14357	58193	709553	chromHMM_state10_EnhA2 Skeletal_Muscle_Female human	Skeletal_Muscle_Female	NA	human	MUSCLE	PrimaryTissue	10_EnhA2_E108.bed	4.20243e-23	31991
hyper	53	chromHMM_state10_EnhA2	21.5488	1.33422	1367	33	24	38	38	31.7	12485	58382	711425	chromHMM_state10_EnhA2 Colon_Smooth_Muscle human	Colon_Smooth_Muscle	NA	human	GI_COLON	PrimaryTissue	10_EnhA2_E076.bed	8.39368e-22	24140
hyper	17	chromHMM_state10_EnhA2	19.7268	1.27684	1716	34	30	32	34	32	16385	58033	707525	chromHMM_state10_EnhA2 iPS_DF_19.11_Cell_Line human	iPS_DF_19.11_Cell_Line	NA	human	IPSC	PrimaryCulture	10_EnhA2_E022.bed	5.40672e-20	30385
hyper	43	chromHMM_state10_EnhA2	19.1744	1.16147	4491	35	43	6	43	28	47342	55258	676568	chromHMM_state10_EnhA2 Aorta human	Aorta	NA	human	VASCULAR	PrimaryTissue	10_EnhA2_E065.bed	1.87413e-19	52417
hyper	69	chromHMM_state10_EnhA2	12.9448	1.35485	712	36	19	51	51	35.3	6387	59037	717523	chromHMM_state10_EnhA2 Pancreas human	Pancreas	NA	human	PANCREAS	PrimaryTissue	10_EnhA2_E098.bed	3.09106e-13	10536
hyper	39	chromHMM_state10_EnhA2	10.5394	1.20105	1515	37	41	36	41	38	15348	58234	708562	chromHMM_state10_EnhA2 Penis_Foreskin_Melanocyte_Primary_Cells_skin01 human	Penis_Foreskin_Melanocyte_Primary_Cells_skin01	NA	human	SKIN	PrimaryCulture	10_EnhA2_E059.bed	7.6485e-11	31677
hyper	10	chromHMM_state10_EnhA2	10.2932	1.24046	1072	38	38	43	43	39.7	10507	58677	713403	chromHMM_state10_EnhA2 HUES48_Cell_Line human	HUES48_Cell_Line	NA	human	ESC	PrimaryCulture	10_EnhA2_E014.bed	1.31291e-10	27769
hyper	6	chromHMM_state10_EnhA2	8.60274	1.24437	851	39	37	49	49	41.7	8309	58898	715601	chromHMM_state10_EnhA2 H9_Cell_Line human	H9_Cell_Line	NA	human	ESC	PrimaryCulture	10_EnhA2_E008.bed	6.27224e-09	23118
hyper	8	chromHMM_state10_EnhA2	6.94451	1.23705	702	40	39	52	52	43.7	6891	59047	717019	chromHMM_state10_EnhA2 hESC_Derived_CD56+_Ectoderm_Cultured_Cells human	hESC_Derived_CD56+_Ectoderm_Cultured_Cells	NA	human	ESC_DERIVED	ESCDerived	10_EnhA2_E012.bed	2.78391e-07	18354
hyper	70	chromHMM_state10_EnhA2	6.63808	1.19577	935	41	42	48	48	43.7	9498	58814	714412	chromHMM_state10_EnhA2 Placenta_Amnion human	Placenta_Amnion	NA	human	PLACENTA	PrimaryTissue	10_EnhA2_E099.bed	5.5e-07	17646
hyper	63	chromHMM_state10_EnhA2	5.67055	1.11984	1924	42	50	31	50	41	20888	57825	703022	chromHMM_state10_EnhA2 Fetal_Stomach human	Fetal_Stomach	NA	human	GI_STOMACH	PrimaryTissue	10_EnhA2_E092.bed	4.98225e-06	36820
hyper	74	chromHMM_state10_EnhA2	5.29697	1.14202	1286	43	47	41	47	43.7	13680	58463	710230	chromHMM_state10_EnhA2 Rectal_Smooth_Muscle human	Rectal_Smooth_Muscle	NA	human	GI_RECTUM	PrimaryTissue	10_EnhA2_E103.bed	1.15025e-05	30539
hyper	57	chromHMM_state10_EnhA2	5.00979	1.14447	1164	44	46	42	46	44	12353	58585	711557	chromHMM_state10_EnhA2 Fetal_Intestine_Large human	Fetal_Intestine_Large	NA	human	GI_INTESTINE	PrimaryTissue	10_EnhA2_E084.bed	2.17763e-05	34645
hyper	54	chromHMM_state10_EnhA2	4.69245	1.10107	2113	45	52	26	52	41	23326	57636	700584	chromHMM_state10_EnhA2 Duodenum_Smooth_Muscle human	Duodenum_Smooth_Muscle	NA	human	GI_DUODENUM	PrimaryTissue	10_EnhA2_E078.bed	4.42142e-05	35934
hyper	3	chromHMM_state10_EnhA2	4.56405	1.12348	1392	46	49	37	49	44	15050	58357	708860	chromHMM_state10_EnhA2 H1_BMP4_Derived_Trophoblast_Cultured_Cells human	H1_BMP4_Derived_Trophoblast_Cultured_Cells	NA	human	ESC_DERIVED	ESCDerived	10_EnhA2_E005.bed	5.8132e-05	31535
hyper	12	chromHMM_state10_EnhA2	4.39817	1.21984	465	47	40	67	67	51.3	4625	59284	719285	chromHMM_state10_EnhA2 HUES64_Cell_Line human	HUES64_Cell_Line	NA	human	ESC	PrimaryCulture	10_EnhA2_E016.bed	8.33605e-05	16461
hyper	84	chromHMM_state10_EnhA2	3.99144	1.25445	320	48	34	74	74	52	3094	59429	720816	chromHMM_state10_EnhA2 Dnd41_TCell_Leukemia human	Dnd41_TCell_Leukemia	NA	human	BLOOD	CellLine	10_EnhA2_E115.bed	0.000208231	10691
hyper	58	chromHMM_state10_EnhA2	3.96772	1.13487	990	49	48	46	49	47.7	10590	58759	713320	chromHMM_state10_EnhA2 Fetal_Intestine_Small human	Fetal_Intestine_Small	NA	human	GI_INTESTINE	PrimaryTissue	10_EnhA2_E085.bed	0.000215431	29572
hyper	41	chromHMM_state10_EnhA2	2.96543	1.14554	590	50	45	58	58	51	6248	59159	717662	chromHMM_state10_EnhA2 Peripheral_Blood_Mononuclear_Primary_Cells human	Peripheral_Blood_Mononuclear_Primary_Cells	NA	human	BLOOD	PrimaryCell	10_EnhA2_E062.bed	0.00212238	10234
hyper	40	chromHMM_state10_EnhA2	2.1254	1.11484	576	51	51	60	60	54	6266	59173	717644	chromHMM_state10_EnhA2 Penis_Foreskin_Melanocyte_Primary_Cells_skin03 human	Penis_Foreskin_Melanocyte_Primary_Cells_skin03	NA	human	SKIN	PrimaryCulture	10_EnhA2_E061.bed	0.0143964	19277
hyper	15	chromHMM_state10_EnhA2	1.99625	1.15766	294	52	44	75	75	57	3079	59455	720831	chromHMM_state10_EnhA2 iPS-20b_Cell_Line human	iPS-20b_Cell_Line	NA	human	IPSC	PrimaryCulture	10_EnhA2_E020.bed	0.0190095	11350
hyper	35	chromHMM_state10_EnhA2	0.657623	1.06235	194	53	53	83	83	63	2213	59555	721697	chromHMM_state10_EnhA2 Mobilized_CD34_Primary_Cells_Female human	Mobilized_CD34_Primary_Cells_Female	NA	human	BLOOD	PrimaryCell	10_EnhA2_E050.bed	0.406749	6402
hyper	90	chromHMM_state10_EnhA2	0.406371	1.00956	994	54	54	45	54	51	11931	58755	711979	chromHMM_state10_EnhA2 HSMMtube_Skeletal_Muscle_Myotubes_Derived_from_HSMM human	HSMMtube_Skeletal_Muscle_Myotubes_Derived_from_HSMM	NA	human	MUSCLE	PrimaryCulture	10_EnhA2_E121.bed	0.711969	39455
hyper	86	chromHMM_state10_EnhA2	0.26886	0.995278	260	55	55	78	78	62.7	3165	59489	720745	chromHMM_state10_EnhA2 HeLa-S3_Cervical_Carcinoma human	HeLa-S3_Cervical_Carcinoma	NA	human	CERVIX	CellLine	10_EnhA2_E117.bed	0.959408	10525
hyper	14	chromHMM_state10_EnhA2	0.215065	0.975668	103	56	61	93	93	70	1279	59646	722631	chromHMM_state10_EnhA2 iPS-18_Cell_Line human	iPS-18_Cell_Line	NA	human	IPSC	PrimaryCulture	10_EnhA2_E019.bed	1	6179
hyper	80	chromHMM_state10_EnhA2	0.213487	0.99032	847	57	56	50	57	54.3	10361	58902	713549	chromHMM_state10_EnhA2 Stomach_Smooth_Muscle human	Stomach_Smooth_Muscle	NA	human	GI_STOMACH	PrimaryTissue	10_EnhA2_E111.bed	1	26983
hyper	1	chromHMM_state10_EnhA2	0.198126	0.986351	614	58	57	56	58	57	7541	59135	716369	chromHMM_state10_EnhA2 H1_Cell_Line human	H1_Cell_Line	NA	human	ESC	PrimaryCulture	10_EnhA2_E003.bed	1	25165
hyper	64	chromHMM_state10_EnhA2	0.142783	0.977883	701	59	60	53	60	57.3	8683	59048	715227	chromHMM_state10_EnhA2 Fetal_Thymus human	Fetal_Thymus	NA	human	THYMUS	PrimaryTissue	10_EnhA2_E093.bed	1	17110
hyper	60	chromHMM_state10_EnhA2	0.125423	0.978814	1039	60	59	44	60	54.3	12856	58710	711054	chromHMM_state10_EnhA2 Fetal_Muscle_Trunk human	Fetal_Muscle_Trunk	NA	human	MUSCLE	PrimaryTissue	10_EnhA2_E089.bed	1	25856
hyper	62	chromHMM_state10_EnhA2	0.118021	0.979811	1303	61	58	40	61	53	16105	58446	707805	chromHMM_state10_EnhA2 Fetal_Placenta human	Fetal_Placenta	NA	human	PLACENTA	PrimaryTissue	10_EnhA2_E091.bed	1	39759
hyper	95	chromHMM_state10_EnhA2	0.111824	0.967279	523	62	62	62	62	62	6549	59226	717361	chromHMM_state10_EnhA2 NHDF-Ad_Adult_Dermal_Fibroblasts human	NHDF-Ad_Adult_Dermal_Fibroblasts	NA	human	SKIN	PrimaryCulture	10_EnhA2_E126.bed	1	18349
hyper	29	chromHMM_state10_EnhA2	0.0617983	0.936131	291	63	63	77	77	67.7	3765	59458	720145	chromHMM_state10_EnhA2 CD4+_CD25+_CD127-_Treg_Primary_Cells human	CD4+_CD25+_CD127-_Treg_Primary_Cells	NA	human	BLOOD	PrimaryCell	10_EnhA2_E044.bed	1	11222
hyper	87	chromHMM_state10_EnhA2	0.0545894	0.849192	49	64	70	98	98	77.3	699	59700	723211	chromHMM_state10_EnhA2 HepG2_Hepatocellular_Carcinoma human	HepG2_Hepatocellular_Carcinoma	NA	human	LIVER	CellLine	10_EnhA2_E118.bed	1	4198
hyper	92	chromHMM_state10_EnhA2	0.0277381	0.874679	131	65	68	91	91	74.7	1814	59618	722096	chromHMM_state10_EnhA2 K562_Leukemia human	K562_Leukemia	NA	human	BLOOD	PrimaryCulture	10_EnhA2_E123.bed	1	5925
hyper	61	chromHMM_state10_EnhA2	0.00727129	0.9322	977	66	64	47	66	59	12683	58772	711227	chromHMM_state10_EnhA2 Fetal_Muscle_Leg human	Fetal_Muscle_Leg	NA	human	MUSCLE_LEG	PrimaryTissue	10_EnhA2_E090.bed	1	37405
hyper	30	chromHMM_state10_EnhA2	0.00662757	0.906776	509	67	65	63	67	65	6795	59240	717115	chromHMM_state10_EnhA2 CD4+_CD25int_CD127+_Tmem_Primary_Cells human	CD4+_CD25int_CD127+_Tmem_Primary_Cells	NA	human	BLOOD	PrimaryCell	10_EnhA2_E045.bed	1	13341
hyper	32	chromHMM_state10_EnhA2	0.00572087	0.804194	101	68	73	94	94	78.3	1521	59648	722389	chromHMM_state10_EnhA2 CD8_Naive_Primary_Cells human	CD8_Naive_Primary_Cells	NA	human	BLOOD	PrimaryCell	10_EnhA2_E047.bed	1	3342
hyper	24	chromHMM_state10_EnhA2	0.00399653	0.85494	228	69	69	81	81	73	3229	59521	720681	chromHMM_state10_EnhA2 CD4+_CD25-_CD45RA+_Naive_Primary_Cells human	CD4+_CD25-_CD45RA+_Naive_Primary_Cells	NA	human	BLOOD	PrimaryCell	10_EnhA2_E039.bed	1	7799
hyper	28	chromHMM_state10_EnhA2	0.00314559	0.717508	50	70	81	97	97	82.7	844	59699	723066	chromHMM_state10_EnhA2 CD4+_CD25-_Th_Primary_Cells human	CD4+_CD25-_Th_Primary_Cells	NA	human	BLOOD	PrimaryCell	10_EnhA2_E043.bed	1	2020
hyper	56	chromHMM_state10_EnhA2	0.0011694	0.895303	660	71	67	55	71	64.3	8920	59089	714990	chromHMM_state10_EnhA2 Fetal_Adrenal_Gland human	Fetal_Adrenal_Gland	NA	human	ADRENAL	PrimaryTissue	10_EnhA2_E080.bed	1	35241
hyper	11	chromHMM_state10_EnhA2	0.000599705	0.788495	155	72	77	86	86	78.3	2380	59594	721530	chromHMM_state10_EnhA2 HUES6_Cell_Line human	HUES6_Cell_Line	NA	human	ESC	PrimaryCulture	10_EnhA2_E015.bed	1	12839
hyper	26	chromHMM_state10_EnhA2	6.39076e-05	0.827855	370	73	71	72	73	72	5408	59379	718502	chromHMM_state10_EnhA2 CD4+_CD25-_IL17-_PMA-Ionomycin_stimulated_MACS_purified_T	CD4+_CD25-_IL17-_PMA-Ionomycin_stimulated_MACS_purified_Th_Primary_Cells	NA	human	BLOOD	PrimaryCell	10_EnhA2_E041.bed	1	14745
hyper	91	chromHMM_state10_EnhA2	1.30329e-05	0.727772	152	74	80	88	88	80.7	2528	59597	721382	chromHMM_state10_EnhA2 HUVEC_Umbilical_Vein_Endothelial_Cells human	HUVEC_Umbilical_Vein_Endothelial_Cells	NA	human	VASCULAR	PrimaryCulture	10_EnhA2_E122.bed	1	8504
hyper	19	chromHMM_state10_EnhA2	1.25714e-05	0.660631	86	75	85	95	95	85	1576	59663	722334	chromHMM_state10_EnhA2 CD14_Primary_Cells human	CD14_Primary_Cells	NA	human	BLOOD	PrimaryCell	10_EnhA2_E029.bed	1	3382
hyper	20	chromHMM_state10_EnhA2	3.02373e-06	0.579541	55	76	93	96	96	88.3	1149	59694	722761	chromHMM_state10_EnhA2 CD19_Primary_Cells_Peripheral_UW human	CD19_Primary_Cells_Peripheral_UW	NA	human	BLOOD	PrimaryCell	10_EnhA2_E032.bed	1	3687
hyper	4	chromHMM_state10_EnhA2	1.56897e-06	0.905301	2204	77	66	24	77	55.7	29383	57545	694527	chromHMM_state10_EnhA2 H1_Derived_Mesenchymal_Stem_Cells human	H1_Derived_Mesenchymal_Stem_Cells	NA	human	ESC_DERIVED	ESCDerived	10_EnhA2_E006.bed	1	41401
hyper	97	chromHMM_state10_EnhA2	3.78115e-07	0.818152	574	78	72	61	78	70.3	8482	59175	715428	chromHMM_state10_EnhA2 NHLF_Lung_Fibroblasts human	NHLF_Lung_Fibroblasts	NA	human	LUNG	PrimaryCulture	10_EnhA2_E128.bed	1	22285
hyper	98	chromHMM_state10_EnhA2	3.1148e-07	0.800922	472	79	74	65	79	72.7	7126	59277	716784	chromHMM_state10_EnhA2 Osteoblasts human	Osteoblasts	NA	human	BONE	PrimaryCulture	10_EnhA2_E129.bed	1	30679
hyper	31	chromHMM_state10_EnhA2	7.78673e-08	0.793417	483	80	75	64	80	73	7360	59266	716550	chromHMM_state10_EnhA2 CD56_Primary_Cells human	CD56_Primary_Cells	NA	human	BLOOD	PrimaryCell	10_EnhA2_E046.bed	1	16473
hyper	18	chromHMM_state10_EnhA2	6.61455e-08	0.790139	471	81	76	66	81	74.3	7207	59278	716703	chromHMM_state10_EnhA2 Bone_Marrow_Derived_Mesenchymal_Stem_Cell_Cultured_Cells	Bone_Marrow_Derived_Mesenchymal_Stem_Cell_Cultured_Cells	NA	human	STROMAL_CONNECTIVE	PrimaryCulture	10_EnhA2_E026.bed	1	32970
hyper	89	chromHMM_state10_EnhA2	3.97441e-09	0.752558	383	82	79	70	82	77	6153	59366	717757	chromHMM_state10_EnhA2 HSMM_Skeletal_Muscle_Myoblasts human	HSMM_Skeletal_Muscle_Myoblasts	NA	human	MUSCLE	PrimaryCulture	10_EnhA2_E120.bed	1	23072
hyper	23	chromHMM_state10_EnhA2	8.04495e-11	0.586914	122	83	92	92	92	89	2515	59627	721395	chromHMM_state10_EnhA2 CD4_Naive_Primary_Cells human	CD4_Naive_Primary_Cells	NA	human	BLOOD	PrimaryCell	10_EnhA2_E038.bed	1	2924
hyper	83	chromHMM_state10_EnhA2	8.89091e-12	0.624322	178	84	89	84	89	85.7	3448	59571	720462	chromHMM_state10_EnhA2 A549_EtOH_0.02pct_Lung_Carcinoma human	A549_EtOH_0.02pct_Lung_Carcinoma	NA	human	LUNG	CellLine	10_EnhA2_E114.bed	1	15798
hyper	85	chromHMM_state10_EnhA2	3.83272e-12	0.619268	178	85	90	84	90	86.3	3476	59571	720434	chromHMM_state10_EnhA2 GM12878_Lymphoblastoid human	GM12878_Lymphoblastoid	NA	human	BLOOD	PrimaryCulture	10_EnhA2_E116.bed	1	9886
hyper	38	chromHMM_state10_EnhA2	1.07874e-12	0.676871	294	86	84	75	86	81.7	5250	59455	718660	chromHMM_state10_EnhA2 Penis_Foreskin_Keratinocyte_Primary_Cells_skin03 human	Penis_Foreskin_Keratinocyte_Primary_Cells_skin03	NA	human	SKIN	PrimaryCulture	10_EnhA2_E058.bed	1	21467
hyper	21	chromHMM_state10_EnhA2	8.04008e-13	0.658154	256	87	86	79	87	84	4702	59493	719208	chromHMM_state10_EnhA2 CD3_Primary_Cells_Peripheral_UW human	CD3_Primary_Cells_Peripheral_UW	NA	human	BLOOD	PrimaryCell	10_EnhA2_E034.bed	1	13841
hyper	42	chromHMM_state10_EnhA2	6.89494e-14	0.759436	694	88	78	54	88	73.3	11031	59055	712879	chromHMM_state10_EnhA2 Adipose_Nuclei human	Adipose_Nuclei	NA	human	FAT	PrimaryTissue	10_EnhA2_E063.bed	1	34405
hyper	34	chromHMM_state10_EnhA2	4.62877e-15	0.684354	384	89	83	69	89	80.3	6778	59365	717132	chromHMM_state10_EnhA2 Chondrocytes_from_Bone_Marrow_Derived_Mesenchymal_Stem_Ce	Chondrocytes_from_Bone_Marrow_Derived_Mesenchymal_Stem_Cell_Cultured_Cells	NA	human	STROMAL_CONNECTIVE	PrimaryCulture	10_EnhA2_E049.bed	1	32424
hyper	96	chromHMM_state10_EnhA2	9.64327e-17	0.537543	146	90	95	90	95	91.7	3284	59603	720626	chromHMM_state10_EnhA2 NHEK-Epidermal_Keratinocytes human	NHEK-Epidermal_Keratinocytes	NA	human	SKIN	PrimaryCulture	10_EnhA2_E127.bed	1	14878
hyper	27	chromHMM_state10_EnhA2	4.82164e-17	0.54219	154	91	94	87	94	90.7	3434	59595	720476	chromHMM_state10_EnhA2 CD4+_CD25-_IL17+_PMA-Ionomcyin_stimulated_Th17_Primary_Ce	CD4+_CD25-_IL17+_PMA-Ionomcyin_stimulated_Th17_Primary_Cells	NA	human	BLOOD	PrimaryCell	10_EnhA2_E042.bed	1	6700
hyper	37	chromHMM_state10_EnhA2	0	0.695597	613	92	82	57	92	77	10629	59136	713281	chromHMM_state10_EnhA2 Penis_Foreskin_Fibroblast_Primary_Cells_skin02 human	Penis_Foreskin_Fibroblast_Primary_Cells_skin02	NA	human	SKIN	PrimaryCulture	10_EnhA2_E056.bed	1	27164
hyper	13	chromHMM_state10_EnhA2	0	0.588277	464	92	91	68	92	83.7	9505	59285	714405	chromHMM_state10_EnhA2 IMR90_Cell_Line human	IMR90_Cell_Line	NA	human	LUNG	CellLine	10_EnhA2_E017.bed	1	32752
hyper	94	chromHMM_state10_EnhA2	0	0.63617	382	92	88	71	92	83.7	7249	59367	716661	chromHMM_state10_EnhA2 NH-A_Astrocytes human	NH-A_Astrocytes	NA	human	BRAIN	PrimaryCulture	10_EnhA2_E125.bed	1	28357
hyper	36	chromHMM_state10_EnhA2	0	0.639005	335	92	87	73	92	84	6332	59414	717578	chromHMM_state10_EnhA2 Penis_Foreskin_Fibroblast_Primary_Cells_skin01 human	Penis_Foreskin_Fibroblast_Primary_Cells_skin01	NA	human	SKIN	PrimaryCulture	10_EnhA2_E055.bed	1	23254
hyper	93	chromHMM_state10_EnhA2	0	0.507103	230	92	96	80	96	89.3	5475	59519	718435	chromHMM_state10_EnhA2 Monocytes-CD14+_RO01746 human	Monocytes-CD14+_RO01746	NA	human	BLOOD	PrimaryCell	10_EnhA2_E124.bed	1	19707
hyper	25	chromHMM_state10_EnhA2	0	0.426432	221	92	98	82	98	90.7	6248	59528	717662	chromHMM_state10_EnhA2 CD4+_CD25-_CD45RO+_Memory_Primary_Cells human	CD4+_CD25-_CD45RO+_Memory_Primary_Cells	NA	human	BLOOD	PrimaryCell	10_EnhA2_E040.bed	1	4910
hyper	88	chromHMM_state10_EnhA2	0	0.494117	148	92	97	89	97	92.7	3620	59601	720290	chromHMM_state10_EnhA2 HMEC_Mammary_Epithelial human	HMEC_Mammary_Epithelial	NA	human	BREAST	PrimaryCulture	10_EnhA2_E119.bed	1	16077
hyper	69	chromHMM_state11_EnhWk	Inf	2.18532	11468	1	1	1	1	1	70972	48281	652938	chromHMM_state11_EnhWk Pancreas human	Pancreas	NA	human	PANCREAS	PrimaryTissue	11_EnhWk_E098.bed	0	115004
hyper	65	chromHMM_state11_EnhWk	Inf	2.17674	7396	1	2	4	4	2.33	44117	52353	679793	chromHMM_state11_EnhWk Gastric human	Gastric	NA	human	GI_STOMACH	PrimaryTissue	11_EnhWk_E094.bed	0	78357
hyper	82	chromHMM_state11_EnhWk	Inf	1.88281	7471	1	5	3	5	3	51071	52278	672839	chromHMM_state11_EnhWk Spleen human	Spleen	NA	human	SPLEEN	PrimaryTissue	11_EnhWk_E113.bed	0	82027
hyper	5	chromHMM_state11_EnhWk	Inf	2.02143	7375	1	4	5	5	3.33	47144	52374	676766	chromHMM_state11_EnhWk H1_Derived_Neuronal_Progenitor_Cultured_Cells human	H1_Derived_Neuronal_Progenitor_Cultured_Cells	NA	human	ESC_DERIVED	ESCDerived	11_EnhWk_E007.bed	0	94517
hyper	67	chromHMM_state11_EnhWk	Inf	2.02478	5146	1	3	23	23	9	32196	54603	691714	chromHMM_state11_EnhWk Lung human	Lung	NA	human	LUNG	PrimaryTissue	11_EnhWk_E096.bed	0	68385
hyper	16	chromHMM_state11_EnhWk	290.574	1.75054	5999	6	6	14	14	8.67	43388	53750	680522	chromHMM_state11_EnhWk iPS_DF_6.9_Cell_Line human	iPS_DF_6.9_Cell_Line	NA	human	IPSC	PrimaryCulture	11_EnhWk_E021.bed	3.10875e-290	88615
hyper	70	chromHMM_state11_EnhWk	260.735	1.62605	7090	7	7	6	7	6.67	55357	52659	668553	chromHMM_state11_EnhWk Placenta_Amnion human	Placenta_Amnion	NA	human	PLACENTA	PrimaryTissue	11_EnhWk_E099.bed	1.83862e-260	78589
hyper	3	chromHMM_state11_EnhWk	211.216	1.57569	6439	8	9	9	9	8.67	51540	53310	672370	chromHMM_state11_EnhWk H1_BMP4_Derived_Trophoblast_Cultured_Cells human	H1_BMP4_Derived_Trophoblast_Cultured_Cells	NA	human	ESC_DERIVED	ESCDerived	11_EnhWk_E005.bed	5.31548e-211	107292
hyper	31	chromHMM_state11_EnhWk	198.525	1.61402	5419	9	8	19	19	12	42132	54330	681778	chromHMM_state11_EnhWk CD56_Primary_Cells human	CD56_Primary_Cells	NA	human	BLOOD	PrimaryCell	11_EnhWk_E046.bed	2.31775e-198	68096
hyper	17	chromHMM_state11_EnhWk	191.368	1.48287	7784	10	21	2	21	11	66417	51965	657493	chromHMM_state11_EnhWk iPS_DF_19.11_Cell_Line human	iPS_DF_19.11_Cell_Line	NA	human	IPSC	PrimaryCulture	11_EnhWk_E022.bed	2.99729e-191	125281
hyper	62	chromHMM_state11_EnhWk	189.644	1.5361	6434	11	13	10	13	11.3	52729	53315	671181	chromHMM_state11_EnhWk Fetal_Placenta human	Fetal_Placenta	NA	human	PLACENTA	PrimaryTissue	11_EnhWk_E091.bed	1.44382e-189	86657
hyper	8	chromHMM_state11_EnhWk	183.549	1.54072	6117	12	12	12	12	12	49895	53632	674015	chromHMM_state11_EnhWk hESC_Derived_CD56+_Ectoderm_Cultured_Cells human	hESC_Derived_CD56+_Ectoderm_Cultured_Cells	NA	human	ESC_DERIVED	ESCDerived	11_EnhWk_E012.bed	1.64582e-183	97295
hyper	4	chromHMM_state11_EnhWk	174.27	1.50383	6506	13	16	8	16	12.3	54401	53243	669509	chromHMM_state11_EnhWk H1_Derived_Mesenchymal_Stem_Cells human	H1_Derived_Mesenchymal_Stem_Cells	NA	human	ESC_DERIVED	ESCDerived	11_EnhWk_E006.bed	2.8877e-174	99368
hyper	1	chromHMM_state11_EnhWk	165.521	1.49838	6259	14	19	11	19	14.7	52437	53490	671473	chromHMM_state11_EnhWk H1_Cell_Line human	H1_Cell_Line	NA	human	ESC	PrimaryCulture	11_EnhWk_E003.bed	1.50477e-165	105743
hyper	76	chromHMM_state11_EnhWk	165.465	1.57218	4979	15	10	25	25	16.7	39570	54770	684340	chromHMM_state11_EnhWk Right_Ventricle human	Right_Ventricle	NA	human	HEART	PrimaryTissue	11_EnhWk_E105.bed	1.59795e-165	84286
hyper	32	chromHMM_state11_EnhWk	146.442	1.46774	6091	16	22	13	22	17	51968	53658	671942	chromHMM_state11_EnhWk CD8_Naive_Primary_Cells human	CD8_Naive_Primary_Cells	NA	human	BLOOD	PrimaryCell	11_EnhWk_E047.bed	1.57784e-146	76528
hyper	24	chromHMM_state11_EnhWk	127.645	1.52066	4383	17	14	36	36	22.3	35821	55366	688089	chromHMM_state11_EnhWk CD4+_CD25-_CD45RA+_Naive_Primary_Cells human	CD4+_CD25-_CD45RA+_Naive_Primary_Cells	NA	human	BLOOD	PrimaryCell	11_EnhWk_E039.bed	9.32268e-128	71335
hyper	23	chromHMM_state11_EnhWk	127.272	1.46612	5250	18	23	21	23	20.7	44632	54499	679278	chromHMM_state11_EnhWk CD4_Naive_Primary_Cells human	CD4_Naive_Primary_Cells	NA	human	BLOOD	PrimaryCell	11_EnhWk_E038.bed	2.07428e-127	76924
hyper	92	chromHMM_state11_EnhWk	125.565	1.46286	5235	19	25	22	25	22	44594	54514	679316	chromHMM_state11_EnhWk K562_Leukemia human	K562_Leukemia	NA	human	BLOOD	PrimaryCulture	11_EnhWk_E123.bed	1.00123e-125	99261
hyper	7	chromHMM_state11_EnhWk	122.414	1.5012	4459	20	18	34	34	24	36907	55290	687003	chromHMM_state11_EnhWk hESC_Derived_CD184+_Endoderm_Cultured_Cells human	hESC_Derived_CD184+_Endoderm_Cultured_Cells	NA	human	ESC_DERIVED	ESCDerived	11_EnhWk_E011.bed	1.34804e-122	115472
hyper	25	chromHMM_state11_EnhWk	121.158	1.44411	5402	21	27	20	27	22.7	46618	54347	677292	chromHMM_state11_EnhWk CD4+_CD25-_CD45RO+_Memory_Primary_Cells human	CD4+_CD25-_CD45RO+_Memory_Primary_Cells	NA	human	BLOOD	PrimaryCell	11_EnhWk_E040.bed	2.31458e-121	74098
hyper	11	chromHMM_state11_EnhWk	118.417	1.38038	6927	22	37	7	37	22	62806	52822	661104	chromHMM_state11_EnhWk HUES6_Cell_Line human	HUES6_Cell_Line	NA	human	ESC	PrimaryCulture	11_EnhWk_E015.bed	1.20081e-118	134654
hyper	20	chromHMM_state11_EnhWk	118.403	1.41859	5836	23	33	16	33	24	51323	53913	672587	chromHMM_state11_EnhWk CD19_Primary_Cells_Peripheral_UW human	CD19_Primary_Cells_Peripheral_UW	NA	human	BLOOD	PrimaryCell	11_EnhWk_E032.bed	1.20081e-118	79265
hyper	55	chromHMM_state11_EnhWk	111.83	1.51625	3856	24	15	51	51	30	31504	55893	692406	chromHMM_state11_EnhWk Esophagus human	Esophagus	NA	human	GI_ESOPHAGUS	PrimaryTissue	11_EnhWk_E079.bed	4.30596e-112	66874
hyper	75	chromHMM_state11_EnhWk	108.467	1.50273	3896	25	17	49	49	30.3	32112	55853	691798	chromHMM_state11_EnhWk Right_Atrium human	Right_Atrium	NA	human	HEART	PrimaryTissue	11_EnhWk_E104.bed	9.54893e-109	89068
hyper	68	chromHMM_state11_EnhWk	105.699	1.45559	4458	26	26	35	35	29	37994	55291	685916	chromHMM_state11_EnhWk Ovary human	Ovary	NA	human	OVARY	PrimaryTissue	11_EnhWk_E097.bed	5.38254e-106	91399
hyper	27	chromHMM_state11_EnhWk	104.796	1.46504	4268	27	24	40	40	30.3	36115	55481	687795	chromHMM_state11_EnhWk CD4+_CD25-_IL17+_PMA-Ionomcyin_stimulated_Th17_Primary_Ce	CD4+_CD25-_IL17+_PMA-Ionomcyin_stimulated_Th17_Primary_Cells	NA	human	BLOOD	PrimaryCell	11_EnhWk_E042.bed	4.13803e-105	71849
hyper	64	chromHMM_state11_EnhWk	103.501	1.42362	4930	28	32	26	32	28.7	43013	54819	680897	chromHMM_state11_EnhWk Fetal_Thymus human	Fetal_Thymus	NA	human	THYMUS	PrimaryTissue	11_EnhWk_E093.bed	7.88123e-104	76659
hyper	28	chromHMM_state11_EnhWk	103.205	1.41781	5033	29	35	24	35	29.3	44104	54716	679806	chromHMM_state11_EnhWk CD4+_CD25-_Th_Primary_Cells human	CD4+_CD25-_Th_Primary_Cells	NA	human	BLOOD	PrimaryCell	11_EnhWk_E043.bed	1.50278e-103	71033
hyper	26	chromHMM_state11_EnhWk	102.85	1.48556	3895	30	20	50	50	33.3	32458	55854	691452	chromHMM_state11_EnhWk CD4+_CD25-_IL17-_PMA-Ionomycin_stimulated_MACS_purified_T	CD4+_CD25-_IL17-_PMA-Ionomycin_stimulated_MACS_purified_Th_Primary_Cells	NA	human	BLOOD	PrimaryCell	11_EnhWk_E041.bed	3.29194e-103	73220
hyper	44	chromHMM_state11_EnhWk	99.2228	1.41792	4819	31	34	29	34	31.3	42180	54930	681730	chromHMM_state11_EnhWk Adult_Liver human	Adult_Liver	NA	human	LIVER	PrimaryTissue	11_EnhWk_E066.bed	1.35021e-99	94018
hyper	9	chromHMM_state11_EnhWk	94.9818	1.42434	4477	32	31	33	33	32	38952	55272	684958	chromHMM_state11_EnhWk hESC_Derived_CD56+_Mesoderm_Cultured_Cells human	hESC_Derived_CD56+_Mesoderm_Cultured_Cells	NA	human	ESC_DERIVED	ESCDerived	11_EnhWk_E013.bed	2.27842e-95	87155
hyper	30	chromHMM_state11_EnhWk	89.9697	1.56502	2655	33	11	74	74	39.3	20889	57094	703021	chromHMM_state11_EnhWk CD4+_CD25int_CD127+_Tmem_Primary_Cells human	CD4+_CD25int_CD127+_Tmem_Primary_Cells	NA	human	BLOOD	PrimaryCell	11_EnhWk_E045.bed	2.27187e-90	44146
hyper	21	chromHMM_state11_EnhWk	81.991	1.43736	3631	34	29	55	55	39.3	31183	56118	692727	chromHMM_state11_EnhWk CD3_Primary_Cells_Peripheral_UW human	CD3_Primary_Cells_Peripheral_UW	NA	human	BLOOD	PrimaryCell	11_EnhWk_E034.bed	2.09922e-82	58507
hyper	35	chromHMM_state11_EnhWk	78.993	1.32551	5841	35	42	15	42	30.7	54703	53908	669207	chromHMM_state11_EnhWk Mobilized_CD34_Primary_Cells_Female human	Mobilized_CD34_Primary_Cells_Female	NA	human	BLOOD	PrimaryCell	11_EnhWk_E050.bed	2.03018e-79	108768
hyper	6	chromHMM_state11_EnhWk	77.9751	1.42881	3556	36	30	56	56	40.7	30702	56193	693208	chromHMM_state11_EnhWk H9_Cell_Line human	H9_Cell_Line	NA	human	ESC	PrimaryCulture	11_EnhWk_E008.bed	2.05664e-78	87438
hyper	66	chromHMM_state11_EnhWk	70.3995	1.37134	4069	37	38	45	45	40	36625	55680	687285	chromHMM_state11_EnhWk Left_Ventricle human	Left_Ventricle	NA	human	HEART	PrimaryTissue	11_EnhWk_E095.bed	7.5312e-71	90961
hyper	14	chromHMM_state11_EnhWk	65.3102	1.29919	5516	38	45	17	45	33.3	52558	54233	671352	chromHMM_state11_EnhWk iPS-18_Cell_Line human	iPS-18_Cell_Line	NA	human	IPSC	PrimaryCulture	11_EnhWk_E019.bed	9.00754e-66	128126
hyper	22	chromHMM_state11_EnhWk	64.5323	1.31691	4899	39	44	27	44	36.7	45979	54850	677931	chromHMM_state11_EnhWk CD4_Memory_Primary_Cells human	CD4_Memory_Primary_Cells	NA	human	BLOOD	PrimaryCell	11_EnhWk_E037.bed	5.26269e-65	77188
hyper	85	chromHMM_state11_EnhWk	61.3663	1.34672	3951	40	39	47	47	42	36161	55798	687749	chromHMM_state11_EnhWk GM12878_Lymphoblastoid human	GM12878_Lymphoblastoid	NA	human	BLOOD	PrimaryCulture	11_EnhWk_E116.bed	7.51937e-62	93704
hyper	41	chromHMM_state11_EnhWk	60.8389	1.43775	2638	41	28	77	77	48.7	22533	57111	701377	chromHMM_state11_EnhWk Peripheral_Blood_Mononuclear_Primary_Cells human	Peripheral_Blood_Mononuclear_Primary_Cells	NA	human	BLOOD	PrimaryCell	11_EnhWk_E062.bed	2.47128e-61	44015
hyper	33	chromHMM_state11_EnhWk	58.529	1.31861	4358	42	43	37	43	40.7	40761	55391	683149	chromHMM_state11_EnhWk CD8_Memory_Primary_Cells human	CD8_Memory_Primary_Cells	NA	human	BLOOD	PrimaryCell	11_EnhWk_E048.bed	4.92408e-59	72328
hyper	12	chromHMM_state11_EnhWk	53.3076	1.28942	4679	43	46	31	46	40	44752	55070	679158	chromHMM_state11_EnhWk HUES64_Cell_Line human	HUES64_Cell_Line	NA	human	ESC	PrimaryCulture	11_EnhWk_E016.bed	8.00718e-54	119709
hyper	42	chromHMM_state11_EnhWk	48.8687	1.27103	4795	44	47	30	47	40.3	46503	54954	677407	chromHMM_state11_EnhWk Adipose_Nuclei human	Adipose_Nuclei	NA	human	FAT	PrimaryTissue	11_EnhWk_E063.bed	2.1497e-49	104786
hyper	81	chromHMM_state11_EnhWk	40.3424	1.38349	2122	45	36	88	88	56.3	18768	57627	705142	chromHMM_state11_EnhWk Thymus human	Thymus	NA	human	THYMUS	PrimaryTissue	11_EnhWk_E112.bed	7.06266e-41	47098
hyper	15	chromHMM_state11_EnhWk	38.4341	1.25448	4129	46	50	43	50	46.3	40445	55620	683465	chromHMM_state11_EnhWk iPS-20b_Cell_Line human	iPS-20b_Cell_Line	NA	human	IPSC	PrimaryCulture	11_EnhWk_E020.bed	5.59401e-39	114775
hyper	77	chromHMM_state11_EnhWk	37.6196	1.34174	2392	47	40	83	83	56.7	21822	57357	702088	chromHMM_state11_EnhWk Sigmoid_Colon human	Sigmoid_Colon	NA	human	GI_COLON	PrimaryTissue	11_EnhWk_E106.bed	3.57201e-38	57522
hyper	94	chromHMM_state11_EnhWk	36.116	1.24866	4023	48	52	46	52	48.7	39566	55726	684344	chromHMM_state11_EnhWk NH-A_Astrocytes human	NH-A_Astrocytes	NA	human	BRAIN	PrimaryCulture	11_EnhWk_E125.bed	1.11512e-36	91201
hyper	39	chromHMM_state11_EnhWk	32.6611	1.25657	3401	49	49	59	59	52.3	33178	56348	690732	chromHMM_state11_EnhWk Penis_Foreskin_Melanocyte_Primary_Cells_skin01 human	Penis_Foreskin_Melanocyte_Primary_Cells_skin01	NA	human	SKIN	PrimaryCulture	11_EnhWk_E059.bed	3.11406e-33	79430
hyper	10	chromHMM_state11_EnhWk	24.2943	1.19884	3933	50	59	48	59	52.3	40187	55816	683723	chromHMM_state11_EnhWk HUES48_Cell_Line human	HUES48_Cell_Line	NA	human	ESC	PrimaryCulture	11_EnhWk_E014.bed	7.10093e-25	123849
hyper	52	chromHMM_state11_EnhWk	24.1262	1.32576	1612	51	41	94	94	62	14830	58137	709080	chromHMM_state11_EnhWk Colonic_Mucosa human	Colonic_Mucosa	NA	human	GI_COLON	PrimaryTissue	11_EnhWk_E075.bed	1.0252e-24	34809
hyper	88	chromHMM_state11_EnhWk	23.5979	1.16523	5450	52	63	18	63	44.3	57410	54299	666500	chromHMM_state11_EnhWk HMEC_Mammary_Epithelial human	HMEC_Mammary_Epithelial	NA	human	BREAST	PrimaryCulture	11_EnhWk_E119.bed	3.39347e-24	115932
hyper	60	chromHMM_state11_EnhWk	22.5584	1.19805	3647	53	60	54	60	55.7	37258	56102	686652	chromHMM_state11_EnhWk Fetal_Muscle_Trunk human	Fetal_Muscle_Trunk	NA	human	MUSCLE	PrimaryTissue	11_EnhWk_E089.bed	3.64715e-23	69741
hyper	83	chromHMM_state11_EnhWk	22.4856	1.19704	3669	54	61	53	61	56	37515	56080	686395	chromHMM_state11_EnhWk A549_EtOH_0.02pct_Lung_Carcinoma human	A549_EtOH_0.02pct_Lung_Carcinoma	NA	human	LUNG	CellLine	11_EnhWk_E114.bed	4.23251e-23	91588
hyper	90	chromHMM_state11_EnhWk	21.2549	1.19965	3361	55	58	60	60	57.7	34265	56388	689645	chromHMM_state11_EnhWk HSMMtube_Skeletal_Muscle_Myotubes_Derived_from_HSMM human	HSMMtube_Skeletal_Muscle_Myotubes_Derived_from_HSMM	NA	human	MUSCLE	PrimaryCulture	11_EnhWk_E121.bed	7.06832e-22	94857
hyper	29	chromHMM_state11_EnhWk	21.1246	1.25701	2107	56	48	89	89	64.3	20456	57642	703454	chromHMM_state11_EnhWk CD4+_CD25+_CD127-_Treg_Primary_Cells human	CD4+_CD25+_CD127-_Treg_Primary_Cells	NA	human	BLOOD	PrimaryCell	11_EnhWk_E044.bed	9.37046e-22	48531
hyper	58	chromHMM_state11_EnhWk	20.0721	1.2106	2856	57	56	70	70	61	28823	56893	695087	chromHMM_state11_EnhWk Fetal_Intestine_Small human	Fetal_Intestine_Small	NA	human	GI_INTESTINE	PrimaryTissue	11_EnhWk_E085.bed	1.039e-20	79540
hyper	57	chromHMM_state11_EnhWk	18.8225	1.20129	2891	58	57	69	69	61.3	29396	56858	694514	chromHMM_state11_EnhWk Fetal_Intestine_Large human	Fetal_Intestine_Large	NA	human	GI_INTESTINE	PrimaryTissue	11_EnhWk_E084.bed	1.81399e-19	78222
hyper	2	chromHMM_state11_EnhWk	18.2672	1.23211	2156	59	54	87	87	66.7	21346	57593	702564	chromHMM_state11_EnhWk H1_BMP4_Derived_Mesendoderm_Cultured_Cells human	H1_BMP4_Derived_Mesendoderm_Cultured_Cells	NA	human	ESC_DERIVED	ESCDerived	11_EnhWk_E004.bed	6.40541e-19	78172
hyper	72	chromHMM_state11_EnhWk	16.946	1.25247	1709	60	51	93	93	68	16628	58040	707282	chromHMM_state11_EnhWk Rectal_Mucosa.Donor_29 human	Rectal_Mucosa.Donor_29	NA	human	GI_RECTUM	PrimaryTissue	11_EnhWk_E101.bed	1.31949e-17	46948
hyper	40	chromHMM_state11_EnhWk	14.8477	1.14198	4306	61	65	38	65	54.7	46097	55443	677813	chromHMM_state11_EnhWk Penis_Foreskin_Melanocyte_Primary_Cells_skin03 human	Penis_Foreskin_Melanocyte_Primary_Cells_skin03	NA	human	SKIN	PrimaryCulture	11_EnhWk_E061.bed	1.62749e-15	122662
hyper	84	chromHMM_state11_EnhWk	14.5589	1.21608	1909	62	55	91	91	69.3	19128	57840	704782	chromHMM_state11_EnhWk Dnd41_TCell_Leukemia human	Dnd41_TCell_Leukemia	NA	human	BLOOD	CellLine	11_EnhWk_E115.bed	3.11388e-15	55258
hyper	89	chromHMM_state11_EnhWk	13.918	1.15189	3504	63	64	57	64	61.3	37143	56245	686767	chromHMM_state11_EnhWk HSMM_Skeletal_Muscle_Myoblasts human	HSMM_Skeletal_Muscle_Myoblasts	NA	human	MUSCLE	PrimaryCulture	11_EnhWk_E120.bed	1.34055e-14	89367
hyper	19	chromHMM_state11_EnhWk	13.7903	1.12838	4826	64	70	28	70	54	52298	54923	671612	chromHMM_state11_EnhWk CD14_Primary_Cells human	CD14_Primary_Cells	NA	human	BLOOD	PrimaryCell	11_EnhWk_E029.bed	1.7707e-14	96503
hyper	73	chromHMM_state11_EnhWk	13.6606	1.1684	2817	65	62	71	71	66	29411	56932	694499	chromHMM_state11_EnhWk Rectal_Mucosa.Donor_31 human	Rectal_Mucosa.Donor_31	NA	human	GI_RECTUM	PrimaryTissue	11_EnhWk_E102.bed	2.34992e-14	74560
hyper	91	chromHMM_state11_EnhWk	11.4079	1.13907	3304	66	66	62	66	64.7	35382	56445	688528	chromHMM_state11_EnhWk HUVEC_Umbilical_Vein_Endothelial_Cells human	HUVEC_Umbilical_Vein_Endothelial_Cells	NA	human	VASCULAR	PrimaryCulture	11_EnhWk_E122.bed	4.14132e-12	92761
hyper	13	chromHMM_state11_EnhWk	10.8152	1.12056	4108	67	72	44	72	61	44747	55641	679163	chromHMM_state11_EnhWk IMR90_Cell_Line human	IMR90_Cell_Line	NA	human	LUNG	CellLine	11_EnhWk_E017.bed	1.59688e-11	104856
hyper	56	chromHMM_state11_EnhWk	10.7976	1.13249	3405	68	68	58	68	64.7	36672	56344	687238	chromHMM_state11_EnhWk Fetal_Adrenal_Gland human	Fetal_Adrenal_Gland	NA	human	ADRENAL	PrimaryTissue	11_EnhWk_E080.bed	1.63847e-11	99975
hyper	49	chromHMM_state11_EnhWk	8.76992	1.13312	2646	69	67	75	75	70.3	28440	57103	695470	chromHMM_state11_EnhWk Brain_Inferior_Temporal_Lobe human	Brain_Inferior_Temporal_Lobe	NA	human	BRAIN	PrimaryTissue	11_EnhWk_E072.bed	1.72113e-09	77687
hyper	43	chromHMM_state11_EnhWk	8.64605	1.23321	929	70	53	97	97	73.3	9154	58820	714756	chromHMM_state11_EnhWk Aorta human	Aorta	NA	human	VASCULAR	PrimaryTissue	11_EnhWk_E065.bed	2.25646e-09	37630
hyper	61	chromHMM_state11_EnhWk	8.62475	1.09978	4581	71	75	32	75	59.3	50819	55168	673091	chromHMM_state11_EnhWk Fetal_Muscle_Leg human	Fetal_Muscle_Leg	NA	human	MUSCLE_LEG	PrimaryTissue	11_EnhWk_E090.bed	2.33653e-09	104301
hyper	54	chromHMM_state11_EnhWk	7.70817	1.1248	2573	72	71	79	79	74	27848	57176	696062	chromHMM_state11_EnhWk Duodenum_Smooth_Muscle human	Duodenum_Smooth_Muscle	NA	human	GI_DUODENUM	PrimaryTissue	11_EnhWk_E078.bed	1.9014e-08	67450
hyper	50	chromHMM_state11_EnhWk	7.4313	1.13027	2269	73	69	85	85	75.7	24429	57480	699481	chromHMM_state11_EnhWk Brain_Mid_Frontal_Lobe human	Brain_Mid_Frontal_Lobe	NA	human	BRAIN	PrimaryTissue	11_EnhWk_E073.bed	3.54781e-08	63176
hyper	51	chromHMM_state11_EnhWk	6.3524	1.1035	2934	74	73	68	74	71.7	32362	56815	691548	chromHMM_state11_EnhWk Brain_Substantia_Nigra human	Brain_Substantia_Nigra	NA	human	BRAIN	PrimaryTissue	11_EnhWk_E074.bed	4.19707e-07	86897
hyper	47	chromHMM_state11_EnhWk	5.4869	1.09819	2717	75	76	73	76	74.7	30097	57032	693813	chromHMM_state11_EnhWk Brain_Cingulate_Gyrus human	Brain_Cingulate_Gyrus	NA	human	BRAIN	PrimaryTissue	11_EnhWk_E069.bed	3.03818e-06	83490
hyper	71	chromHMM_state11_EnhWk	5.31456	1.09757	2644	76	77	76	77	76.3	29301	57105	694609	chromHMM_state11_EnhWk Psoas_Muscle human	Psoas_Muscle	NA	human	MUSCLE	PrimaryTissue	11_EnhWk_E100.bed	4.45871e-06	85204
hyper	93	chromHMM_state11_EnhWk	4.93605	1.1011	2250	77	74	86	86	79	24843	57499	699067	chromHMM_state11_EnhWk Monocytes-CD14+_RO01746 human	Monocytes-CD14+_RO01746	NA	human	BLOOD	PrimaryCell	11_EnhWk_E124.bed	1.05206e-05	81644
hyper	46	chromHMM_state11_EnhWk	4.34959	1.08761	2537	78	78	81	81	79	28358	57212	695552	chromHMM_state11_EnhWk Brain_Anterior_Caudate human	Brain_Anterior_Caudate	NA	human	BRAIN	PrimaryTissue	11_EnhWk_E068.bed	4.00771e-05	83587
hyper	48	chromHMM_state11_EnhWk	3.28203	1.06723	2968	79	79	67	79	75	33801	56781	690109	chromHMM_state11_EnhWk Brain_Hippocampus_Middle human	Brain_Hippocampus_Middle	NA	human	BRAIN	PrimaryTissue	11_EnhWk_E071.bed	0.000462302	96273
hyper	45	chromHMM_state11_EnhWk	2.55842	1.06312	2379	80	80	84	84	81.3	27177	57370	696733	chromHMM_state11_EnhWk Brain_Angular_Gyrus human	Brain_Angular_Gyrus	NA	human	BRAIN	PrimaryTissue	11_EnhWk_E067.bed	0.00241585	75017
hyper	97	chromHMM_state11_EnhWk	1.4074	1.03538	2981	81	81	66	81	76	34943	56768	688967	chromHMM_state11_EnhWk NHLF_Lung_Fibroblasts human	NHLF_Lung_Fibroblasts	NA	human	LUNG	PrimaryCulture	11_EnhWk_E128.bed	0.0337826	81658
hyper	18	chromHMM_state11_EnhWk	1.08906	1.02989	2594	82	82	78	82	80.7	30555	57155	693355	chromHMM_state11_EnhWk Bone_Marrow_Derived_Mesenchymal_Stem_Cell_Cultured_Cells	Bone_Marrow_Derived_Mesenchymal_Stem_Cell_Cultured_Cells	NA	human	STROMAL_CONNECTIVE	PrimaryCulture	11_EnhWk_E026.bed	0.0694552	100505
hyper	37	chromHMM_state11_EnhWk	0.782276	1.02004	2796	83	84	72	84	79.7	33241	56953	690669	chromHMM_state11_EnhWk Penis_Foreskin_Fibroblast_Primary_Cells_skin02 human	Penis_Foreskin_Fibroblast_Primary_Cells_skin02	NA	human	SKIN	PrimaryCulture	11_EnhWk_E056.bed	0.139067	79887
hyper	34	chromHMM_state11_EnhWk	0.700488	1.01618	3236	84	85	63	85	77.3	38616	56513	685294	chromHMM_state11_EnhWk Chondrocytes_from_Bone_Marrow_Derived_Mesenchymal_Stem_Ce	Chondrocytes_from_Bone_Marrow_Derived_Mesenchymal_Stem_Cell_Cultured_Cells	NA	human	STROMAL_CONNECTIVE	PrimaryCulture	11_EnhWk_E049.bed	0.165887	120010
hyper	78	chromHMM_state11_EnhWk	0.634019	1.01299	3794	85	87	52	87	74.7	45415	55955	678495	chromHMM_state11_EnhWk Skeletal_Muscle_Female human	Skeletal_Muscle_Female	NA	human	MUSCLE	PrimaryTissue	11_EnhWk_E108.bed	0.191047	100071
hyper	79	chromHMM_state11_EnhWk	0.612637	1.02054	1337	86	83	96	96	88.3	15880	58412	708030	chromHMM_state11_EnhWk Small_Intestine human	Small_Intestine	NA	human	GI_INTESTINE	PrimaryTissue	11_EnhWk_E109.bed	0.198355	48604
hyper	38	chromHMM_state11_EnhWk	0.591353	1.01097	4297	87	88	39	88	71.3	51537	55452	672373	chromHMM_state11_EnhWk Penis_Foreskin_Keratinocyte_Primary_Cells_skin03 human	Penis_Foreskin_Keratinocyte_Primary_Cells_skin03	NA	human	SKIN	PrimaryCulture	11_EnhWk_E058.bed	0.205924	113498
hyper	80	chromHMM_state11_EnhWk	0.571698	1.01572	1819	88	86	92	92	88.7	21708	57930	702202	chromHMM_state11_EnhWk Stomach_Smooth_Muscle human	Stomach_Smooth_Muscle	NA	human	GI_STOMACH	PrimaryTissue	11_EnhWk_E111.bed	0.213009	63576
hyper	95	chromHMM_state11_EnhWk	0.184456	0.993529	4186	89	89	41	89	73	51024	55563	672886	chromHMM_state11_EnhWk NHDF-Ad_Adult_Dermal_Fibroblasts human	NHDF-Ad_Adult_Dermal_Fibroblasts	NA	human	SKIN	PrimaryCulture	11_EnhWk_E126.bed	0.513727	120729
hyper	63	chromHMM_state11_EnhWk	0.116904	0.983213	1960	90	90	90	90	90	24139	57789	699771	chromHMM_state11_EnhWk Fetal_Stomach human	Fetal_Stomach	NA	human	GI_STOMACH	PrimaryTissue	11_EnhWk_E092.bed	0.593516	72749
hyper	96	chromHMM_state11_EnhWk	0.0737709	0.981663	3350	91	91	61	91	81	41303	56399	682607	chromHMM_state11_EnhWk NHEK-Epidermal_Keratinocytes human	NHEK-Epidermal_Keratinocytes	NA	human	SKIN	PrimaryCulture	11_EnhWk_E127.bed	0.648286	109577
hyper	87	chromHMM_state11_EnhWk	0.0486013	0.97947	4147	92	92	42	92	75.3	51223	55602	672687	chromHMM_state11_EnhWk HepG2_Hepatocellular_Carcinoma human	HepG2_Hepatocellular_Carcinoma	NA	human	LIVER	CellLine	11_EnhWk_E118.bed	0.679501	118580
hyper	74	chromHMM_state11_EnhWk	0.0264661	0.960183	1602	93	93	95	95	93.7	20192	58147	703718	chromHMM_state11_EnhWk Rectal_Smooth_Muscle human	Rectal_Smooth_Muscle	NA	human	GI_RECTUM	PrimaryTissue	11_EnhWk_E103.bed	0.707343	61447
hyper	53	chromHMM_state11_EnhWk	0.000624416	0.945106	3112	94	94	65	94	84.3	39774	56637	684136	chromHMM_state11_EnhWk Colon_Smooth_Muscle human	Colon_Smooth_Muscle	NA	human	GI_COLON	PrimaryTissue	11_EnhWk_E076.bed	0.713433	98200
hyper	98	chromHMM_state11_EnhWk	4.54707e-06	0.915397	2535	95	95	82	95	90.7	33421	57214	690489	chromHMM_state11_EnhWk Osteoblasts human	Osteoblasts	NA	human	BONE	PrimaryCulture	11_EnhWk_E129.bed	0.713433	105606
hyper	86	chromHMM_state11_EnhWk	1.53263e-09	0.887874	2572	96	96	80	96	90.7	34907	57177	689003	chromHMM_state11_EnhWk HeLa-S3_Cervical_Carcinoma human	HeLa-S3_Cervical_Carcinoma	NA	human	CERVIX	CellLine	11_EnhWk_E117.bed	0.713433	85585
hyper	36	chromHMM_state11_EnhWk	0	0.831644	3125	97	97	64	97	86	45051	56624	678859	chromHMM_state11_EnhWk Penis_Foreskin_Fibroblast_Primary_Cells_skin01 human	Penis_Foreskin_Fibroblast_Primary_Cells_skin01	NA	human	SKIN	PrimaryCulture	11_EnhWk_E055.bed	0.713433	112083
hyper	59	chromHMM_state11_EnhWk	0	0.617726	772	97	98	98	98	97.7	15022	58977	708888	chromHMM_state11_EnhWk Pancreatic_Islets human	Pancreatic_Islets	NA	human	PANCREAS	PrimaryTissue	11_EnhWk_E087.bed	0.713433	63029
hyper	82	chromHMM_state12_ZNF_Rpts	Inf	2.98836	2891	1	1	1	1	1	12111	56858	711799	chromHMM_state12_ZNF_Rpts Spleen human	Spleen	NA	human	SPLEEN	PrimaryTissue	12_ZNF_Rpts_E113.bed	0	25683
hyper	67	chromHMM_state12_ZNF_Rpts	164.991	1.93715	2403	2	2	2	2	2	15328	57346	708582	chromHMM_state12_ZNF_Rpts Lung human	Lung	NA	human	LUNG	PrimaryTissue	12_ZNF_Rpts_E096.bed	5.00363e-164	52415
hyper	85	chromHMM_state12_ZNF_Rpts	71.8325	1.69776	1531	3	4	4	4	3.67	11042	58218	712868	chromHMM_state12_ZNF_Rpts GM12878_Lymphoblastoid human	GM12878_Lymphoblastoid	NA	human	BLOOD	PrimaryCulture	12_ZNF_Rpts_E116.bed	4.80357e-71	29401
hyper	43	chromHMM_state12_ZNF_Rpts	65.4225	1.69035	1411	4	5	6	6	5	10212	58338	713698	chromHMM_state12_ZNF_Rpts Aorta human	Aorta	NA	human	VASCULAR	PrimaryTissue	12_ZNF_Rpts_E065.bed	9.2622e-65	47546
hyper	65	chromHMM_state12_ZNF_Rpts	31.9383	1.77949	564	5	3	23	23	10.3	3856	59185	720054	chromHMM_state12_ZNF_Rpts Gastric human	Gastric	NA	human	GI_STOMACH	PrimaryTissue	12_ZNF_Rpts_E094.bed	2.25945e-31	14301
hyper	69	chromHMM_state12_ZNF_Rpts	18.1473	1.43371	742	6	9	15	15	10	6294	59007	717616	chromHMM_state12_ZNF_Rpts Pancreas human	Pancreas	NA	human	PANCREAS	PrimaryTissue	12_ZNF_Rpts_E098.bed	1.16349e-17	26687
hyper	75	chromHMM_state12_ZNF_Rpts	17.5112	1.60701	427	7	6	34	34	15.7	3228	59322	720682	chromHMM_state12_ZNF_Rpts Right_Atrium human	Right_Atrium	NA	human	HEART	PrimaryTissue	12_ZNF_Rpts_E104.bed	4.31471e-17	14105
hyper	89	chromHMM_state12_ZNF_Rpts	16.9251	1.60079	418	8	7	36	36	17	3172	59331	720738	chromHMM_state12_ZNF_Rpts HSMM_Skeletal_Muscle_Myoblasts human	HSMM_Skeletal_Muscle_Myoblasts	NA	human	MUSCLE	PrimaryCulture	12_ZNF_Rpts_E120.bed	1.45545e-16	8657
hyper	68	chromHMM_state12_ZNF_Rpts	11.5548	1.56353	304	9	8	44	44	20.3	2360	59445	721550	chromHMM_state12_ZNF_Rpts Ovary human	Ovary	NA	human	OVARY	PrimaryTissue	12_ZNF_Rpts_E097.bed	3.03501e-11	8081
hyper	84	chromHMM_state12_ZNF_Rpts	7.30878	1.27612	572	10	13	22	22	15	5442	59177	718468	chromHMM_state12_ZNF_Rpts Dnd41_TCell_Leukemia human	Dnd41_TCell_Leukemia	NA	human	BLOOD	CellLine	12_ZNF_Rpts_E115.bed	4.81333e-07	21219
hyper	52	chromHMM_state12_ZNF_Rpts	5.91417	1.34995	301	11	11	45	45	22.3	2705	59448	721205	chromHMM_state12_ZNF_Rpts Colonic_Mucosa human	Colonic_Mucosa	NA	human	GI_COLON	PrimaryTissue	12_ZNF_Rpts_E075.bed	1.08558e-05	6040
hyper	90	chromHMM_state12_ZNF_Rpts	5.72024	1.35871	278	12	10	49	49	23.7	2482	59471	721428	chromHMM_state12_ZNF_Rpts HSMMtube_Skeletal_Muscle_Myotubes_Derived_from_HSMM hu	HSMMtube_Skeletal_Muscle_Myotubes_Derived_from_HSMM	NA	human	MUSCLE	PrimaryCulture	12_ZNF_Rpts_E121.bed	1.55526e-05	10524
hyper	55	chromHMM_state12_ZNF_Rpts	3.38569	1.14869	675	13	17	17	17	15.7	7130	59074	716780	chromHMM_state12_ZNF_Rpts Esophagus human	Esophagus	NA	human	GI_ESOPHAGUS	PrimaryTissue	12_ZNF_Rpts_E079.bed	0.00310167	23952
hyper	27	chromHMM_state12_ZNF_Rpts	2.94252	1.2938	170	14	12	67	67	31	1593	59579	722317	chromHMM_state12_ZNF_Rpts CD4+_CD25-_IL17+_PMA-Ionomcyin_stimulated_Th17_Primary	CD4+_CD25-_IL17+_PMA-Ionomcyin_stimulated_Th17_Primary_Cells	NA	human	BLOOD	PrimaryCell	12_ZNF_Rpts_E042.bed	0.00799053	5651
hyper	74	chromHMM_state12_ZNF_Rpts	1.77133	1.2002	161	15	15	72	72	34	1626	59588	722284	chromHMM_state12_ZNF_Rpts Rectal_Smooth_Muscle human	Rectal_Smooth_Muscle	NA	human	GI_RECTUM	PrimaryTissue	12_ZNF_Rpts_E103.bed	0.110614	5190
hyper	81	chromHMM_state12_ZNF_Rpts	1.68191	1.10268	499	16	18	30	30	21.3	5487	59250	718423	chromHMM_state12_ZNF_Rpts Thymus human	Thymus	NA	human	THYMUS	PrimaryTissue	12_ZNF_Rpts_E112.bed	0.127407	10971
hyper	24	chromHMM_state12_ZNF_Rpts	1.61972	1.15048	233	17	16	54	54	29	2455	59516	721455	chromHMM_state12_ZNF_Rpts CD4+_CD25-_CD45RA+_Naive_Primary_Cells human	CD4+_CD25-_CD45RA+_Naive_Primary_Cells	NA	human	BLOOD	PrimaryCell	12_ZNF_Rpts_E039.bed	0.135652	8007
hyper	30	chromHMM_state12_ZNF_Rpts	1.60353	1.22149	116	18	14	83	83	38.3	1151	59633	722759	chromHMM_state12_ZNF_Rpts CD4+_CD25int_CD127+_Tmem_Primary_Cells human	CD4+_CD25int_CD127+_Tmem_Primary_Cells	NA	human	BLOOD	PrimaryCell	12_ZNF_Rpts_E045.bed	0.135652	4564
hyper	50	chromHMM_state12_ZNF_Rpts	0.843178	1.09055	178	19	19	65	65	34.3	1978	59571	721932	chromHMM_state12_ZNF_Rpts Brain_Mid_Frontal_Lobe human	Brain_Mid_Frontal_Lobe	NA	human	BRAIN	PrimaryTissue	12_ZNF_Rpts_E073.bed	0.740108	9701
hyper	53	chromHMM_state12_ZNF_Rpts	0.72435	1.07862	162	20	20	71	71	37	1820	59587	722090	chromHMM_state12_ZNF_Rpts Colon_Smooth_Muscle human	Colon_Smooth_Muscle	NA	human	GI_COLON	PrimaryTissue	12_ZNF_Rpts_E076.bed	0.92437	6657
hyper	62	chromHMM_state12_ZNF_Rpts	0.540507	1.02034	893	21	23	11	23	18.3	10607	58856	713303	chromHMM_state12_ZNF_Rpts Fetal_Placenta human	Fetal_Placenta	NA	human	PLACENTA	PrimaryTissue	12_ZNF_Rpts_E091.bed	1	33129
hyper	76	chromHMM_state12_ZNF_Rpts	0.467499	1.04457	115	22	21	84	84	42.3	1334	59634	722576	chromHMM_state12_ZNF_Rpts Right_Ventricle human	Right_Ventricle	NA	human	HEART	PrimaryTissue	12_ZNF_Rpts_E105.bed	1	7491
hyper	72	chromHMM_state12_ZNF_Rpts	0.397305	1.02324	164	23	22	70	70	38.3	1942	59585	721968	chromHMM_state12_ZNF_Rpts Rectal_Mucosa.Donor_29 human	Rectal_Mucosa.Donor_29	NA	human	GI_RECTUM	PrimaryTissue	12_ZNF_Rpts_E101.bed	1	6565
hyper	23	chromHMM_state12_ZNF_Rpts	0.313022	1.00967	72	24	24	93	93	47	864	59677	723046	chromHMM_state12_ZNF_Rpts CD4_Naive_Primary_Cells human	CD4_Naive_Primary_Cells	NA	human	BLOOD	PrimaryCell	12_ZNF_Rpts_E038.bed	1	4191
hyper	79	chromHMM_state12_ZNF_Rpts	0.307801	1.00529	115	25	26	84	84	45	1386	59634	722524	chromHMM_state12_ZNF_Rpts Small_Intestine human	Small_Intestine	NA	human	GI_INTESTINE	PrimaryTissue	12_ZNF_Rpts_E109.bed	1	5321
hyper	33	chromHMM_state12_ZNF_Rpts	0.304863	1.0064	77	26	25	92	92	47.7	927	59672	722983	chromHMM_state12_ZNF_Rpts CD8_Memory_Primary_Cells human	CD8_Memory_Primary_Cells	NA	human	BLOOD	PrimaryCell	12_ZNF_Rpts_E048.bed	1	4426
hyper	77	chromHMM_state12_ZNF_Rpts	0.302262	1.00158	289	27	27	47	47	33.7	3496	59460	720414	chromHMM_state12_ZNF_Rpts Sigmoid_Colon human	Sigmoid_Colon	NA	human	GI_COLON	PrimaryTissue	12_ZNF_Rpts_E106.bed	1	16388
hyper	94	chromHMM_state12_ZNF_Rpts	0.251837	0.991224	220	28	28	58	58	38	2689	59529	721221	chromHMM_state12_ZNF_Rpts NH-A_Astrocytes human	NH-A_Astrocytes	NA	human	BRAIN	PrimaryCulture	12_ZNF_Rpts_E125.bed	1	7620
hyper	4	chromHMM_state12_ZNF_Rpts	0.219072	0.98936	584	29	29	21	29	26.3	7151	59165	716759	chromHMM_state12_ZNF_Rpts H1_Derived_Mesenchymal_Stem_Cells human	H1_Derived_Mesenchymal_Stem_Cells	NA	human	ESC_DERIVED	ESCDerived	12_ZNF_Rpts_E006.bed	1	29719
hyper	47	chromHMM_state12_ZNF_Rpts	0.216842	0.979614	147	30	30	75	75	45	1818	59602	722092	chromHMM_state12_ZNF_Rpts Brain_Cingulate_Gyrus human	Brain_Cingulate_Gyrus	NA	human	BRAIN	PrimaryTissue	12_ZNF_Rpts_E069.bed	1	10356
hyper	92	chromHMM_state12_ZNF_Rpts	0.193566	0.97368	165	31	32	69	69	44	2053	59584	721857	chromHMM_state12_ZNF_Rpts K562_Leukemia human	K562_Leukemia	NA	human	BLOOD	PrimaryCulture	12_ZNF_Rpts_E123.bed	1	6563
hyper	28	chromHMM_state12_ZNF_Rpts	0.161926	0.967116	209	32	34	61	61	42.3	2618	59540	721292	chromHMM_state12_ZNF_Rpts CD4+_CD25-_Th_Primary_Cells human	CD4+_CD25-_Th_Primary_Cells	NA	human	BLOOD	PrimaryCell	12_ZNF_Rpts_E043.bed	1	11834
hyper	29	chromHMM_state12_ZNF_Rpts	0.159519	0.969866	265	33	33	50	50	38.7	3310	59484	720600	chromHMM_state12_ZNF_Rpts CD4+_CD25+_CD127-_Treg_Primary_Cells human	CD4+_CD25+_CD127-_Treg_Primary_Cells	NA	human	BLOOD	PrimaryCell	12_ZNF_Rpts_E044.bed	1	11910
hyper	44	chromHMM_state12_ZNF_Rpts	0.139999	0.973693	511	34	31	29	34	31.3	6357	59238	717553	chromHMM_state12_ZNF_Rpts Adult_Liver human	Adult_Liver	NA	human	LIVER	PrimaryTissue	12_ZNF_Rpts_E066.bed	1	32290
hyper	45	chromHMM_state12_ZNF_Rpts	0.126731	0.939307	107	35	35	87	87	52.3	1380	59642	722530	chromHMM_state12_ZNF_Rpts Brain_Angular_Gyrus human	Brain_Angular_Gyrus	NA	human	BRAIN	PrimaryTissue	12_ZNF_Rpts_E067.bed	1	7793
hyper	51	chromHMM_state12_ZNF_Rpts	0.0903223	0.930863	151	36	37	74	74	49	1965	59598	721945	chromHMM_state12_ZNF_Rpts Brain_Substantia_Nigra human	Brain_Substantia_Nigra	NA	human	BRAIN	PrimaryTissue	12_ZNF_Rpts_E074.bed	1	12442
hyper	70	chromHMM_state12_ZNF_Rpts	0.083355	0.876203	46	37	45	98	98	60	636	59703	723274	chromHMM_state12_ZNF_Rpts Placenta_Amnion human	Placenta_Amnion	NA	human	PLACENTA	PrimaryTissue	12_ZNF_Rpts_E099.bed	1	1931
hyper	46	chromHMM_state12_ZNF_Rpts	0.0534388	0.915812	186	38	39	64	64	47	2460	59563	721450	chromHMM_state12_ZNF_Rpts Brain_Anterior_Caudate human	Brain_Anterior_Caudate	NA	human	BRAIN	PrimaryTissue	12_ZNF_Rpts_E068.bed	1	17388
hyper	25	chromHMM_state12_ZNF_Rpts	0.0509025	0.88007	89	39	43	91	91	57.7	1225	59660	722685	chromHMM_state12_ZNF_Rpts CD4+_CD25-_CD45RO+_Memory_Primary_Cells human	CD4+_CD25-_CD45RO+_Memory_Primary_Cells	NA	human	BLOOD	PrimaryCell	12_ZNF_Rpts_E040.bed	1	6807
hyper	41	chromHMM_state12_ZNF_Rpts	0.0489451	0.92543	263	40	38	51	51	43	3442	59486	720468	chromHMM_state12_ZNF_Rpts Peripheral_Blood_Mononuclear_Primary_Cells human	Peripheral_Blood_Mononuclear_Primary_Cells	NA	human	BLOOD	PrimaryCell	12_ZNF_Rpts_E062.bed	1	12554
hyper	73	chromHMM_state12_ZNF_Rpts	0.0487594	0.891889	117	41	40	80	80	53.7	1589	59632	722321	chromHMM_state12_ZNF_Rpts Rectal_Mucosa.Donor_31 human	Rectal_Mucosa.Donor_31	NA	human	GI_RECTUM	PrimaryTissue	12_ZNF_Rpts_E102.bed	1	6821
hyper	22	chromHMM_state12_ZNF_Rpts	0.0439675	0.853988	65	42	48	94	94	61.3	922	59684	722988	chromHMM_state12_ZNF_Rpts CD4_Memory_Primary_Cells human	CD4_Memory_Primary_Cells	NA	human	BLOOD	PrimaryCell	12_ZNF_Rpts_E037.bed	1	5015
hyper	66	chromHMM_state12_ZNF_Rpts	0.0213862	0.888533	200	43	41	62	62	48.7	2726	59549	721184	chromHMM_state12_ZNF_Rpts Left_Ventricle human	Left_Ventricle	NA	human	HEART	PrimaryTissue	12_ZNF_Rpts_E095.bed	1	18810
hyper	95	chromHMM_state12_ZNF_Rpts	0.0171884	0.83711	96	44	51	89	89	61.3	1389	59653	722521	chromHMM_state12_ZNF_Rpts NHDF-Ad_Adult_Dermal_Fibroblasts human	NHDF-Ad_Adult_Dermal_Fibroblasts	NA	human	SKIN	PrimaryCulture	12_ZNF_Rpts_E126.bed	1	5965
hyper	49	chromHMM_state12_ZNF_Rpts	0.0154507	0.870498	171	45	46	66	66	52.3	2379	59578	721531	chromHMM_state12_ZNF_Rpts Brain_Inferior_Temporal_Lobe human	Brain_Inferior_Temporal_Lobe	NA	human	BRAIN	PrimaryTissue	12_ZNF_Rpts_E072.bed	1	13902
hyper	32	chromHMM_state12_ZNF_Rpts	0.0123341	0.833669	108	46	53	86	86	61.7	1569	59641	722341	chromHMM_state12_ZNF_Rpts CD8_Naive_Primary_Cells human	CD8_Naive_Primary_Cells	NA	human	BLOOD	PrimaryCell	12_ZNF_Rpts_E047.bed	1	6941
hyper	18	chromHMM_state12_ZNF_Rpts	0.010512	0.848094	143	47	49	76	76	57.3	2042	59606	721868	chromHMM_state12_ZNF_Rpts Bone_Marrow_Derived_Mesenchymal_Stem_Cell_Cultured_Cel	Bone_Marrow_Derived_Mesenchymal_Stem_Cell_Cultured_Cells	NA	human	STROMAL_CONNECTIVE	PrimaryCulture	12_ZNF_Rpts_E026.bed	1	9673
hyper	48	chromHMM_state12_ZNF_Rpts	0.0100883	0.857754	169	48	47	68	68	54.3	2386	59580	721524	chromHMM_state12_ZNF_Rpts Brain_Hippocampus_Middle human	Brain_Hippocampus_Middle	NA	human	BRAIN	PrimaryTissue	12_ZNF_Rpts_E071.bed	1	16252
hyper	97	chromHMM_state12_ZNF_Rpts	0.00698409	0.836589	143	49	52	76	76	59	2070	59606	721840	chromHMM_state12_ZNF_Rpts NHLF_Lung_Fibroblasts human	NHLF_Lung_Fibroblasts	NA	human	LUNG	PrimaryCulture	12_ZNF_Rpts_E128.bed	1	6101
hyper	8	chromHMM_state12_ZNF_Rpts	0.00476633	0.812347	119	50	57	79	79	62	1774	59630	722136	chromHMM_state12_ZNF_Rpts hESC_Derived_CD56+_Ectoderm_Cultured_Cells human	hESC_Derived_CD56+_Ectoderm_Cultured_Cells	NA	human	ESC_DERIVED	ESCDerived	12_ZNF_Rpts_E012.bed	1	10502
hyper	37	chromHMM_state12_ZNF_Rpts	0.00418041	0.932597	1204	51	36	7	51	31.3	15619	58545	708291	chromHMM_state12_ZNF_Rpts Penis_Foreskin_Fibroblast_Primary_Cells_skin02 human	Penis_Foreskin_Fibroblast_Primary_Cells_skin02	NA	human	SKIN	PrimaryCulture	12_ZNF_Rpts_E056.bed	1	27450
hyper	26	chromHMM_state12_ZNF_Rpts	0.00115775	0.776289	117	52	63	80	80	65	1825	59632	722085	chromHMM_state12_ZNF_Rpts CD4+_CD25-_IL17-_PMA-Ionomycin_stimulated_MACS_purifie	CD4+_CD25-_IL17-_PMA-Ionomycin_stimulated_MACS_purified_Th_Primary_Cells	NA	human	BLOOD	PrimaryCell	12_ZNF_Rpts_E041.bed	1	9143
hyper	80	chromHMM_state12_ZNF_Rpts	0.000573966	0.771576	130	53	65	78	78	65.3	2040	59619	721870	chromHMM_state12_ZNF_Rpts Stomach_Smooth_Muscle human	Stomach_Smooth_Muscle	NA	human	GI_STOMACH	PrimaryTissue	12_ZNF_Rpts_E111.bed	1	13091
hyper	83	chromHMM_state12_ZNF_Rpts	0.000543587	0.813191	212	54	56	60	60	56.7	3156	59537	720754	chromHMM_state12_ZNF_Rpts A549_EtOH_0.02pct_Lung_Carcinoma human	A549_EtOH_0.02pct_Lung_Carcinoma	NA	human	LUNG	CellLine	12_ZNF_Rpts_E114.bed	1	11394
hyper	78	chromHMM_state12_ZNF_Rpts	0.000425969	0.73638	97	55	71	88	88	71.3	1595	59652	722315	chromHMM_state12_ZNF_Rpts Skeletal_Muscle_Female human	Skeletal_Muscle_Female	NA	human	MUSCLE	PrimaryTissue	12_ZNF_Rpts_E108.bed	1	6915
hyper	21	chromHMM_state12_ZNF_Rpts	0.000352638	0.751915	117	56	69	80	80	68.3	1884	59632	722026	chromHMM_state12_ZNF_Rpts CD3_Primary_Cells_Peripheral_UW human	CD3_Primary_Cells_Peripheral_UW	NA	human	BLOOD	PrimaryCell	12_ZNF_Rpts_E034.bed	1	11376
hyper	88	chromHMM_state12_ZNF_Rpts	0.000325293	0.885104	704	57	42	16	57	38.3	9622	59045	714288	chromHMM_state12_ZNF_Rpts HMEC_Mammary_Epithelial human	HMEC_Mammary_Epithelial	NA	human	BREAST	PrimaryCulture	12_ZNF_Rpts_E119.bed	1	20295
hyper	31	chromHMM_state12_ZNF_Rpts	0.000208316	0.823071	288	58	54	48	58	53.3	4235	59461	719675	chromHMM_state12_ZNF_Rpts CD56_Primary_Cells human	CD56_Primary_Cells	NA	human	BLOOD	PrimaryCell	12_ZNF_Rpts_E046.bed	1	19668
hyper	86	chromHMM_state12_ZNF_Rpts	0.000196488	0.662755	59	59	79	96	96	78	1078	59690	722832	chromHMM_state12_ZNF_Rpts HeLa-S3_Cervical_Carcinoma human	HeLa-S3_Cervical_Carcinoma	NA	human	CERVIX	CellLine	12_ZNF_Rpts_E117.bed	1	4161
hyper	6	chromHMM_state12_ZNF_Rpts	7.2559e-05	0.845477	465	60	50	33	60	47.7	6654	59284	717256	chromHMM_state12_ZNF_Rpts H9_Cell_Line human	H9_Cell_Line	NA	human	ESC	PrimaryCulture	12_ZNF_Rpts_E008.bed	1	23661
hyper	34	chromHMM_state12_ZNF_Rpts	6.70116e-05	0.78324	214	61	62	59	62	60.7	3307	59535	720603	chromHMM_state12_ZNF_Rpts Chondrocytes_from_Bone_Marrow_Derived_Mesenchymal_Stem	Chondrocytes_from_Bone_Marrow_Derived_Mesenchymal_Stem_Cell_Cultured_Cells	NA	human	STROMAL_CONNECTIVE	PrimaryCulture	12_ZNF_Rpts_E049.bed	1	17192
hyper	59	chromHMM_state12_ZNF_Rpts	5.30212e-05	0.790102	239	62	61	52	62	58.3	3661	59510	720249	chromHMM_state12_ZNF_Rpts Pancreatic_Islets human	Pancreatic_Islets	NA	human	PANCREAS	PrimaryTissue	12_ZNF_Rpts_E087.bed	1	25709
hyper	98	chromHMM_state12_ZNF_Rpts	6.16662e-06	0.602351	60	63	82	95	95	80	1206	59689	722704	chromHMM_state12_ZNF_Rpts Osteoblasts human	Osteoblasts	NA	human	BONE	PrimaryCulture	12_ZNF_Rpts_E129.bed	1	4774
hyper	14	chromHMM_state12_ZNF_Rpts	4.82683e-06	0.79687	347	64	60	39	64	54.3	5268	59402	718642	chromHMM_state12_ZNF_Rpts iPS-18_Cell_Line human	iPS-18_Cell_Line	NA	human	IPSC	PrimaryCulture	12_ZNF_Rpts_E019.bed	1	28304
hyper	13	chromHMM_state12_ZNF_Rpts	4.44423e-07	0.878895	1430	65	44	5	65	38	19648	58319	704262	chromHMM_state12_ZNF_Rpts IMR90_Cell_Line human	IMR90_Cell_Line	NA	human	LUNG	CellLine	12_ZNF_Rpts_E017.bed	1	41463
hyper	54	chromHMM_state12_ZNF_Rpts	3.88898e-07	0.735169	232	66	72	55	72	64.3	3818	59517	720092	chromHMM_state12_ZNF_Rpts Duodenum_Smooth_Muscle human	Duodenum_Smooth_Muscle	NA	human	GI_DUODENUM	PrimaryTissue	12_ZNF_Rpts_E078.bed	1	20441
hyper	71	chromHMM_state12_ZNF_Rpts	3.85692e-08	0.535429	59	67	97	96	97	86.7	1334	59690	722576	chromHMM_state12_ZNF_Rpts Psoas_Muscle human	Psoas_Muscle	NA	human	MUSCLE	PrimaryTissue	12_ZNF_Rpts_E100.bed	1	14666
hyper	2	chromHMM_state12_ZNF_Rpts	5.11468e-09	0.576949	90	68	91	90	91	83	1888	59659	722022	chromHMM_state12_ZNF_Rpts H1_BMP4_Derived_Mesendoderm_Cultured_Cells human	H1_BMP4_Derived_Mesendoderm_Cultured_Cells	NA	human	ESC_DERIVED	ESCDerived	12_ZNF_Rpts_E004.bed	1	15082
hyper	16	chromHMM_state12_ZNF_Rpts	1.79874e-09	0.6465	160	69	80	73	80	74	2994	59589	720916	chromHMM_state12_ZNF_Rpts iPS_DF_6.9_Cell_Line human	iPS_DF_6.9_Cell_Line	NA	human	IPSC	PrimaryCulture	12_ZNF_Rpts_E021.bed	1	11411
hyper	20	chromHMM_state12_ZNF_Rpts	1.78963e-09	0.695446	238	70	75	53	75	66	4139	59511	719771	chromHMM_state12_ZNF_Rpts CD19_Primary_Cells_Peripheral_UW human	CD19_Primary_Cells_Peripheral_UW	NA	human	BLOOD	PrimaryCell	12_ZNF_Rpts_E032.bed	1	23217
hyper	5	chromHMM_state12_ZNF_Rpts	1.01995e-09	0.740124	368	71	70	37	71	59.3	6011	59381	717899	chromHMM_state12_ZNF_Rpts H1_Derived_Neuronal_Progenitor_Cultured_Cells human	H1_Derived_Neuronal_Progenitor_Cultured_Cells	NA	human	ESC_DERIVED	ESCDerived	12_ZNF_Rpts_E007.bed	1	24022
hyper	10	chromHMM_state12_ZNF_Rpts	1.73559e-11	0.753075	516	72	68	27	72	55.7	8278	59233	715632	chromHMM_state12_ZNF_Rpts HUES48_Cell_Line human	HUES48_Cell_Line	NA	human	ESC	PrimaryCulture	12_ZNF_Rpts_E014.bed	1	34371
hyper	3	chromHMM_state12_ZNF_Rpts	6.5554e-12	0.804155	944	73	58	8	73	46.3	14168	58805	709742	chromHMM_state12_ZNF_Rpts H1_BMP4_Derived_Trophoblast_Cultured_Cells human	H1_BMP4_Derived_Trophoblast_Cultured_Cells	NA	human	ESC_DERIVED	ESCDerived	12_ZNF_Rpts_E005.bed	1	48439
hyper	39	chromHMM_state12_ZNF_Rpts	1.22417e-12	0.797828	942	74	59	9	74	47.3	14248	58807	709662	chromHMM_state12_ZNF_Rpts Penis_Foreskin_Melanocyte_Primary_Cells_skin01 human	Penis_Foreskin_Melanocyte_Primary_Cells_skin01	NA	human	SKIN	PrimaryCulture	12_ZNF_Rpts_E059.bed	1	23606
hyper	15	chromHMM_state12_ZNF_Rpts	1.08159e-12	0.753672	587	75	67	20	75	54	9406	59162	714504	chromHMM_state12_ZNF_Rpts iPS-20b_Cell_Line human	iPS-20b_Cell_Line	NA	human	IPSC	PrimaryCulture	12_ZNF_Rpts_E020.bed	1	35549
hyper	42	chromHMM_state12_ZNF_Rpts	9.2479e-14	0.666936	299	76	78	46	78	66.7	5418	59450	718492	chromHMM_state12_ZNF_Rpts Adipose_Nuclei human	Adipose_Nuclei	NA	human	FAT	PrimaryTissue	12_ZNF_Rpts_E063.bed	1	30859
hyper	9	chromHMM_state12_ZNF_Rpts	7.0203e-14	0.771922	790	77	64	13	77	51.3	12351	58959	711559	chromHMM_state12_ZNF_Rpts hESC_Derived_CD56+_Mesoderm_Cultured_Cells human	hESC_Derived_CD56+_Mesoderm_Cultured_Cells	NA	human	ESC_DERIVED	ESCDerived	12_ZNF_Rpts_E013.bed	1	39603
hyper	40	chromHMM_state12_ZNF_Rpts	2.50243e-14	0.765371	766	78	66	14	78	52.7	12078	58983	711832	chromHMM_state12_ZNF_Rpts Penis_Foreskin_Melanocyte_Primary_Cells_skin03 human	Penis_Foreskin_Melanocyte_Primary_Cells_skin03	NA	human	SKIN	PrimaryCulture	12_ZNF_Rpts_E061.bed	1	29370
hyper	60	chromHMM_state12_ZNF_Rpts	1.36935e-14	0.597921	190	79	86	63	86	76	3842	59559	720068	chromHMM_state12_ZNF_Rpts Fetal_Muscle_Trunk human	Fetal_Muscle_Trunk	NA	human	MUSCLE	PrimaryTissue	12_ZNF_Rpts_E089.bed	1	18414
hyper	1	chromHMM_state12_ZNF_Rpts	4.14661e-15	0.72583	554	80	74	24	80	59.3	9215	59195	714695	chromHMM_state12_ZNF_Rpts H1_Cell_Line human	H1_Cell_Line	NA	human	ESC	PrimaryCulture	12_ZNF_Rpts_E003.bed	1	30332
hyper	36	chromHMM_state12_ZNF_Rpts	9.64327e-17	0.813458	1599	81	55	3	81	46.3	23670	58150	700240	chromHMM_state12_ZNF_Rpts Penis_Foreskin_Fibroblast_Primary_Cells_skin01 human	Penis_Foreskin_Fibroblast_Primary_Cells_skin01	NA	human	SKIN	PrimaryCulture	12_ZNF_Rpts_E055.bed	1	43227
hyper	17	chromHMM_state12_ZNF_Rpts	0	0.733726	933	82	73	10	82	55	15319	58816	708591	chromHMM_state12_ZNF_Rpts iPS_DF_19.11_Cell_Line human	iPS_DF_19.11_Cell_Line	NA	human	IPSC	PrimaryCulture	12_ZNF_Rpts_E022.bed	1	36050
hyper	12	chromHMM_state12_ZNF_Rpts	0	0.684796	630	82	76	19	82	59	11093	59119	712817	chromHMM_state12_ZNF_Rpts HUES64_Cell_Line human	HUES64_Cell_Line	NA	human	ESC	PrimaryCulture	12_ZNF_Rpts_E016.bed	1	40436
hyper	19	chromHMM_state12_ZNF_Rpts	0	0.598527	795	82	85	12	85	59.7	15951	58954	707959	chromHMM_state12_ZNF_Rpts CD14_Primary_Cells human	CD14_Primary_Cells	NA	human	BLOOD	PrimaryCell	12_ZNF_Rpts_E029.bed	1	56665
hyper	38	chromHMM_state12_ZNF_Rpts	0	0.601293	670	82	83	18	83	61	13401	59079	710509	chromHMM_state12_ZNF_Rpts Penis_Foreskin_Keratinocyte_Primary_Cells_skin03 human	Penis_Foreskin_Keratinocyte_Primary_Cells_skin03	NA	human	SKIN	PrimaryCulture	12_ZNF_Rpts_E058.bed	1	35738
hyper	96	chromHMM_state12_ZNF_Rpts	0	0.684488	486	82	77	32	82	63.7	8570	59263	715340	chromHMM_state12_ZNF_Rpts NHEK-Epidermal_Keratinocytes human	NHEK-Epidermal_Keratinocytes	NA	human	SKIN	PrimaryCulture	12_ZNF_Rpts_E127.bed	1	19707
hyper	11	chromHMM_state12_ZNF_Rpts	0	0.589658	552	82	89	25	89	65.3	11270	59197	712640	chromHMM_state12_ZNF_Rpts HUES6_Cell_Line human	HUES6_Cell_Line	NA	human	ESC	PrimaryCulture	12_ZNF_Rpts_E015.bed	1	53182
hyper	58	chromHMM_state12_ZNF_Rpts	0	0.594644	521	82	88	26	88	65.3	10553	59228	713357	chromHMM_state12_ZNF_Rpts Fetal_Intestine_Small human	Fetal_Intestine_Small	NA	human	GI_INTESTINE	PrimaryTissue	12_ZNF_Rpts_E085.bed	1	43189
hyper	57	chromHMM_state12_ZNF_Rpts	0	0.596506	514	82	87	28	87	65.7	10380	59235	713530	chromHMM_state12_ZNF_Rpts Fetal_Intestine_Large human	Fetal_Intestine_Large	NA	human	GI_INTESTINE	PrimaryTissue	12_ZNF_Rpts_E084.bed	1	21677
hyper	63	chromHMM_state12_ZNF_Rpts	0	0.599709	426	82	84	35	84	67	8566	59323	715344	chromHMM_state12_ZNF_Rpts Fetal_Stomach human	Fetal_Stomach	NA	human	GI_STOMACH	PrimaryTissue	12_ZNF_Rpts_E092.bed	1	29765
hyper	64	chromHMM_state12_ZNF_Rpts	0	0.628042	363	82	81	38	82	67	6978	59386	716932	chromHMM_state12_ZNF_Rpts Fetal_Thymus human	Fetal_Thymus	NA	human	THYMUS	PrimaryTissue	12_ZNF_Rpts_E093.bed	1	17504
hyper	7	chromHMM_state12_ZNF_Rpts	0	0.572858	488	82	92	31	92	68.3	10259	59261	713651	chromHMM_state12_ZNF_Rpts hESC_Derived_CD184+_Endoderm_Cultured_Cells human	hESC_Derived_CD184+_Endoderm_Cultured_Cells	NA	human	ESC_DERIVED	ESCDerived	12_ZNF_Rpts_E011.bed	1	58258
hyper	61	chromHMM_state12_ZNF_Rpts	0	0.586954	308	82	90	43	90	71.7	6335	59441	717575	chromHMM_state12_ZNF_Rpts Fetal_Muscle_Leg human	Fetal_Muscle_Leg	NA	human	MUSCLE_LEG	PrimaryTissue	12_ZNF_Rpts_E090.bed	1	31314
hyper	87	chromHMM_state12_ZNF_Rpts	0	0.565836	332	82	93	41	93	72	7079	59417	716831	chromHMM_state12_ZNF_Rpts HepG2_Hepatocellular_Carcinoma human	HepG2_Hepatocellular_Carcinoma	NA	human	LIVER	CellLine	12_ZNF_Rpts_E118.bed	1	41415
hyper	35	chromHMM_state12_ZNF_Rpts	0	0.55391	344	82	96	40	96	72.7	7490	59405	716420	chromHMM_state12_ZNF_Rpts Mobilized_CD34_Primary_Cells_Female human	Mobilized_CD34_Primary_Cells_Female	NA	human	BLOOD	PrimaryCell	12_ZNF_Rpts_E050.bed	1	32098
hyper	93	chromHMM_state12_ZNF_Rpts	0	0.558898	332	82	95	41	95	72.7	7166	59417	716744	chromHMM_state12_ZNF_Rpts Monocytes-CD14+_RO01746 human	Monocytes-CD14+_RO01746	NA	human	BLOOD	PrimaryCell	12_ZNF_Rpts_E124.bed	1	22531
hyper	91	chromHMM_state12_ZNF_Rpts	0	0.563902	232	82	94	55	94	77	4970	59517	718940	chromHMM_state12_ZNF_Rpts HUVEC_Umbilical_Vein_Endothelial_Cells human	HUVEC_Umbilical_Vein_Endothelial_Cells	NA	human	VASCULAR	PrimaryCulture	12_ZNF_Rpts_E122.bed	1	20738
hyper	56	chromHMM_state12_ZNF_Rpts	0	0.482087	228	82	98	57	98	79	5707	59521	718203	chromHMM_state12_ZNF_Rpts Fetal_Adrenal_Gland human	Fetal_Adrenal_Gland	NA	human	ADRENAL	PrimaryTissue	12_ZNF_Rpts_E080.bed	1	25311
hyper	84	chromHMM_state13_Het	115.073	1.76183	2202	1	1	4	4	2	15388	57547	708522	chromHMM_state13_Het Dnd41_TCell_Leukemia human	Dnd41_TCell_Leukemia	NA	human	BLOOD	CellLine	13_Het_E115.bed	8.28127e-114	40774
hyper	86	chromHMM_state13_Het	1.59557	1.09001	588	2	2	38	38	14	6541	59161	717369	chromHMM_state13_Het HeLa-S3_Cervical_Carcinoma human	HeLa-S3_Cervical_Carcinoma	NA	human	CERVIX	CellLine	13_Het_E117.bed	1	10037
hyper	65	chromHMM_state13_Het	0.111556	0.975992	1008	3	3	18	18	8	12508	58741	711402	chromHMM_state13_Het Gastric human	Gastric	NA	human	GI_STOMACH	PrimaryTissue	13_Het_E094.bed	1	29245
hyper	85	chromHMM_state13_Het	0.0344633	0.96234	1501	4	4	12	12	6.67	18879	58248	705031	chromHMM_state13_Het GM12878_Lymphoblastoid human	GM12878_Lymphoblastoid	NA	human	BLOOD	PrimaryCulture	13_Het_E116.bed	1	38166
hyper	92	chromHMM_state13_Het	0.00655429	0.903115	470	5	6	46	46	19	6300	59279	717610	chromHMM_state13_Het K562_Leukemia human	K562_Leukemia	NA	human	BLOOD	PrimaryCulture	13_Het_E123.bed	1	15091
hyper	82	chromHMM_state13_Het	0.00368913	0.944908	1936	6	5	8	8	6.33	24777	57813	699133	chromHMM_state13_Het Spleen human	Spleen	NA	human	SPLEEN	PrimaryTissue	13_Het_E113.bed	1	45811
hyper	83	chromHMM_state13_Het	8.45125e-05	0.857964	550	7	7	42	42	18.7	7755	59199	716155	chromHMM_state13_Het A549_EtOH_0.02pct_Lung_Carcinoma human	A549_EtOH_0.02pct_Lung_Carcinoma	NA	human	LUNG	CellLine	13_Het_E114.bed	1	21626
hyper	23	chromHMM_state13_Het	5.4939e-05	0.715869	113	8	14	97	97	39.7	1911	59636	721999	chromHMM_state13_Het CD4_Naive_Primary_Cells human	CD4_Naive_Primary_Cells	NA	human	BLOOD	PrimaryCell	13_Het_E038.bed	1	8776
hyper	33	chromHMM_state13_Het	5.66612e-06	0.696846	127	9	19	95	95	41	2206	59622	721704	chromHMM_state13_Het CD8_Memory_Primary_Cells human	CD8_Memory_Primary_Cells	NA	human	BLOOD	PrimaryCell	13_Het_E048.bed	1	9715
hyper	22	chromHMM_state13_Het	5.37676e-09	0.675253	188	10	21	87	87	39.3	3368	59561	720542	chromHMM_state13_Het CD4_Memory_Primary_Cells human	CD4_Memory_Primary_Cells	NA	human	BLOOD	PrimaryCell	13_Het_E037.bed	1	14624
hyper	70	chromHMM_state13_Het	1.61367e-10	0.681506	242	11	20	74	74	35	4294	59507	719616	chromHMM_state13_Het Placenta_Amnion human	Placenta_Amnion	NA	human	PLACENTA	PrimaryTissue	13_Het_E099.bed	1	5176
hyper	32	chromHMM_state13_Het	3.8873e-12	0.582148	136	12	36	94	94	47.3	2826	59613	721084	chromHMM_state13_Het CD8_Naive_Primary_Cells human	CD8_Naive_Primary_Cells	NA	human	BLOOD	PrimaryCell	13_Het_E047.bed	1	15308
hyper	52	chromHMM_state13_Het	1.92865e-16	0.653024	329	13	22	62	62	32.3	6086	59420	717824	chromHMM_state13_Het Colonic_Mucosa human	Colonic_Mucosa	NA	human	GI_COLON	PrimaryTissue	13_Het_E075.bed	1	14834
hyper	43	chromHMM_state13_Het	0	0.847897	3959	14	8	1	14	7.67	55908	55790	668002	chromHMM_state13_Het Aorta human	Aorta	NA	human	VASCULAR	PrimaryTissue	13_Het_E065.bed	1	85154
hyper	67	chromHMM_state13_Het	0	0.797135	3815	14	9	2	14	8.33	57058	55934	666852	chromHMM_state13_Het Lung human	Lung	NA	human	LUNG	PrimaryTissue	13_Het_E096.bed	1	91246
hyper	3	chromHMM_state13_Het	0	0.764919	2364	14	11	3	14	9.33	36995	57385	686915	chromHMM_state13_Het H1_BMP4_Derived_Trophoblast_Cultured_Cells human	H1_BMP4_Derived_Trophoblast_Cultured_Cells	NA	human	ESC_DERIVED	ESCDerived	13_Het_E005.bed	1	66457
hyper	69	chromHMM_state13_Het	0	0.789506	2045	14	10	5	14	9.67	31100	57704	692810	chromHMM_state13_Het Pancreas human	Pancreas	NA	human	PANCREAS	PrimaryTissue	13_Het_E098.bed	1	55999
hyper	88	chromHMM_state13_Het	0	0.703979	1986	14	16	6	16	12	33709	57763	690201	chromHMM_state13_Het HMEC_Mammary_Epithelial human	HMEC_Mammary_Epithelial	NA	human	BREAST	PrimaryCulture	13_Het_E119.bed	1	34293
hyper	89	chromHMM_state13_Het	0	0.744445	1089	14	13	16	16	14.3	17614	58660	706296	chromHMM_state13_Het HSMM_Skeletal_Muscle_Myoblasts human	HSMM_Skeletal_Muscle_Myoblasts	NA	human	MUSCLE	PrimaryCulture	13_Het_E120.bed	1	21410
hyper	13	chromHMM_state13_Het	0	0.639637	1750	14	24	9	24	15.7	32610	57999	691300	chromHMM_state13_Het IMR90_Cell_Line human	IMR90_Cell_Line	NA	human	LUNG	CellLine	13_Het_E017.bed	1	57549
hyper	5	chromHMM_state13_Het	0	0.745838	808	14	12	23	23	16.3	13065	58941	710845	chromHMM_state13_Het H1_Derived_Neuronal_Progenitor_Cultured_Cells human	H1_Derived_Neuronal_Progenitor_Cultured_Cells	NA	human	ESC_DERIVED	ESCDerived	13_Het_E007.bed	1	33838
hyper	81	chromHMM_state13_Het	0	0.698906	948	14	18	20	20	17.3	16323	58801	707587	chromHMM_state13_Het Thymus human	Thymus	NA	human	THYMUS	PrimaryTissue	13_Het_E112.bed	1	22372
hyper	55	chromHMM_state13_Het	0	0.63723	1365	14	26	14	26	18	25620	58384	698290	chromHMM_state13_Het Esophagus human	Esophagus	NA	human	GI_ESOPHAGUS	PrimaryTissue	13_Het_E079.bed	1	52666
hyper	91	chromHMM_state13_Het	0	0.583299	1957	14	34	7	34	18.3	39720	57792	684190	chromHMM_state13_Het HUVEC_Umbilical_Vein_Endothelial_Cells human	HUVEC_Umbilical_Vein_Endothelial_Cells	NA	human	VASCULAR	PrimaryCulture	13_Het_E122.bed	1	32776
hyper	4	chromHMM_state13_Het	0	0.62466	1402	14	29	13	29	18.7	26815	58347	697095	chromHMM_state13_Het H1_Derived_Mesenchymal_Stem_Cells human	H1_Derived_Mesenchymal_Stem_Cells	NA	human	ESC_DERIVED	ESCDerived	13_Het_E006.bed	1	42299
hyper	6	chromHMM_state13_Het	0	0.704521	753	14	15	29	29	19.3	12882	58996	711028	chromHMM_state13_Het H9_Cell_Line human	H9_Cell_Line	NA	human	ESC	PrimaryCulture	13_Het_E008.bed	1	36393
hyper	94	chromHMM_state13_Het	0	0.615745	955	14	30	19	30	21	18606	58794	705304	chromHMM_state13_Het NH-A_Astrocytes human	NH-A_Astrocytes	NA	human	BRAIN	PrimaryCulture	13_Het_E125.bed	1	20773
hyper	16	chromHMM_state13_Het	0	0.701247	693	14	17	33	33	21.3	11915	59056	711995	chromHMM_state13_Het iPS_DF_6.9_Cell_Line human	iPS_DF_6.9_Cell_Line	NA	human	IPSC	PrimaryCulture	13_Het_E021.bed	1	17530
hyper	7	chromHMM_state13_Het	0	0.637935	764	14	25	26	26	21.7	14406	58985	709504	chromHMM_state13_Het hESC_Derived_CD184+_Endoderm_Cultured_Cells human	hESC_Derived_CD184+_Endoderm_Cultured_Cells	NA	human	ESC_DERIVED	ESCDerived	13_Het_E011.bed	1	74584
hyper	37	chromHMM_state13_Het	0	0.563136	1629	14	40	11	40	21.7	34322	58120	689588	chromHMM_state13_Het Penis_Foreskin_Fibroblast_Primary_Cells_skin02 human	Penis_Foreskin_Fibroblast_Primary_Cells_skin02	NA	human	SKIN	PrimaryCulture	13_Het_E056.bed	1	46386
hyper	36	chromHMM_state13_Het	0	0.553506	1711	14	44	10	44	22.7	36607	58038	687303	chromHMM_state13_Het Penis_Foreskin_Fibroblast_Primary_Cells_skin01 human	Penis_Foreskin_Fibroblast_Primary_Cells_skin01	NA	human	SKIN	PrimaryCulture	13_Het_E055.bed	1	62235
hyper	97	chromHMM_state13_Het	0	0.577071	1072	14	37	17	37	22.7	22215	58677	701695	chromHMM_state13_Het NHLF_Lung_Fibroblasts human	NHLF_Lung_Fibroblasts	NA	human	LUNG	PrimaryCulture	13_Het_E128.bed	1	22170
hyper	9	chromHMM_state13_Het	0	0.593764	793	14	31	25	31	23.3	16036	58956	707874	chromHMM_state13_Het hESC_Derived_CD56+_Mesoderm_Cultured_Cells human	hESC_Derived_CD56+_Mesoderm_Cultured_Cells	NA	human	ESC_DERIVED	ESCDerived	13_Het_E013.bed	1	64576
hyper	96	chromHMM_state13_Het	0	0.542351	1219	14	47	15	47	25.3	26771	58530	697139	chromHMM_state13_Het NHEK-Epidermal_Keratinocytes human	NHEK-Epidermal_Keratinocytes	NA	human	SKIN	PrimaryCulture	13_Het_E127.bed	1	38365
hyper	2	chromHMM_state13_Het	0	0.647109	512	14	23	45	45	27.3	9542	59237	714368	chromHMM_state13_Het H1_BMP4_Derived_Mesendoderm_Cultured_Cells human	H1_BMP4_Derived_Mesendoderm_Cultured_Cells	NA	human	ESC_DERIVED	ESCDerived	13_Het_E004.bed	1	28366
hyper	17	chromHMM_state13_Het	0	0.59278	560	14	32	39	39	28.3	11373	59189	712537	chromHMM_state13_Het iPS_DF_19.11_Cell_Line human	iPS_DF_19.11_Cell_Line	NA	human	IPSC	PrimaryCulture	13_Het_E022.bed	1	43021
hyper	90	chromHMM_state13_Het	0	0.631392	549	14	28	43	43	28.3	10479	59200	713431	chromHMM_state13_Het HSMMtube_Skeletal_Muscle_Myotubes_Derived_from_HSMM human	HSMMtube_Skeletal_Muscle_Myotubes_Derived_from_HSMM	NA	human	MUSCLE	PrimaryCulture	13_Het_E121.bed	1	19864
hyper	34	chromHMM_state13_Het	0	0.523379	936	14	51	21	51	28.7	21363	58813	702547	chromHMM_state13_Het Chondrocytes_from_Bone_Marrow_Derived_Mesenchymal_Stem_Cell	Chondrocytes_from_Bone_Marrow_Derived_Mesenchymal_Stem_Cell_Cultured_Cells	NA	human	STROMAL_CONNECTIVE	PrimaryCulture	13_Het_E049.bed	1	36752
hyper	98	chromHMM_state13_Het	0	0.543233	694	14	45	32	45	30.3	15329	59055	708581	chromHMM_state13_Het Osteoblasts human	Osteoblasts	NA	human	BONE	PrimaryCulture	13_Het_E129.bed	1	25193
hyper	18	chromHMM_state13_Het	0	0.525393	736	14	49	30	49	31	16786	59013	707124	chromHMM_state13_Het Bone_Marrow_Derived_Mesenchymal_Stem_Cell_Cultured_Cells hu	Bone_Marrow_Derived_Mesenchymal_Stem_Cell_Cultured_Cells	NA	human	STROMAL_CONNECTIVE	PrimaryCulture	13_Het_E026.bed	1	27247
hyper	68	chromHMM_state13_Het	0	0.633139	416	14	27	52	52	31	7929	59333	715981	chromHMM_state13_Het Ovary human	Ovary	NA	human	OVARY	PrimaryTissue	13_Het_E097.bed	1	19269
hyper	39	chromHMM_state13_Het	0	0.56104	554	14	42	40	42	32	11878	59195	712032	chromHMM_state13_Het Penis_Foreskin_Melanocyte_Primary_Cells_skin01 human	Penis_Foreskin_Melanocyte_Primary_Cells_skin01	NA	human	SKIN	PrimaryCulture	13_Het_E059.bed	1	31562
hyper	95	chromHMM_state13_Het	0	0.563821	516	14	39	44	44	32.3	11015	59233	712895	chromHMM_state13_Het NHDF-Ad_Adult_Dermal_Fibroblasts human	NHDF-Ad_Adult_Dermal_Fibroblasts	NA	human	SKIN	PrimaryCulture	13_Het_E126.bed	1	20784
hyper	40	chromHMM_state13_Het	0	0.505039	760	14	58	27	58	33	18008	58989	705902	chromHMM_state13_Het Penis_Foreskin_Melanocyte_Primary_Cells_skin03 human	Penis_Foreskin_Melanocyte_Primary_Cells_skin03	NA	human	SKIN	PrimaryCulture	13_Het_E061.bed	1	46155
hyper	64	chromHMM_state13_Het	0	0.507166	710	14	56	31	56	33.7	16768	59039	707142	chromHMM_state13_Het Fetal_Thymus human	Fetal_Thymus	NA	human	THYMUS	PrimaryTissue	13_Het_E093.bed	1	38865
hyper	1	chromHMM_state13_Het	0	0.557448	459	14	43	47	47	34.7	9916	59290	713994	chromHMM_state13_Het H1_Cell_Line human	H1_Cell_Line	NA	human	ESC	PrimaryCulture	13_Het_E003.bed	1	49877
hyper	62	chromHMM_state13_Het	0	0.485117	803	14	66	24	66	34.7	19773	58946	704137	chromHMM_state13_Het Fetal_Placenta human	Fetal_Placenta	NA	human	PLACENTA	PrimaryTissue	13_Het_E091.bed	1	60370
hyper	72	chromHMM_state13_Het	0	0.582694	351	14	35	56	56	35	7268	59398	716642	chromHMM_state13_Het Rectal_Mucosa.Donor_29 human	Rectal_Mucosa.Donor_29	NA	human	GI_RECTUM	PrimaryTissue	13_Het_E101.bed	1	18705
hyper	75	chromHMM_state13_Het	0	0.507301	635	14	55	36	55	35	15011	59114	708899	chromHMM_state13_Het Right_Atrium human	Right_Atrium	NA	human	HEART	PrimaryTissue	13_Het_E104.bed	1	30238
hyper	11	chromHMM_state13_Het	0	0.502593	659	14	59	35	59	36	15715	59090	708195	chromHMM_state13_Het HUES6_Cell_Line human	HUES6_Cell_Line	NA	human	ESC	PrimaryCulture	13_Het_E015.bed	1	82893
hyper	57	chromHMM_state13_Het	0	0.493735	607	14	62	37	62	37.7	14742	59142	709168	chromHMM_state13_Het Fetal_Intestine_Large human	Fetal_Intestine_Large	NA	human	GI_INTESTINE	PrimaryTissue	13_Het_E084.bed	1	38483
hyper	8	chromHMM_state13_Het	0	0.570683	324	14	38	63	63	38.3	6851	59425	717059	chromHMM_state13_Het hESC_Derived_CD56+_Ectoderm_Cultured_Cells human	hESC_Derived_CD56+_Ectoderm_Cultured_Cells	NA	human	ESC_DERIVED	ESCDerived	13_Het_E012.bed	1	21316
hyper	29	chromHMM_state13_Het	0	0.519843	442	14	52	49	52	38.3	10232	59307	713678	chromHMM_state13_Het CD4+_CD25+_CD127-_Treg_Primary_Cells human	CD4+_CD25+_CD127-_Treg_Primary_Cells	NA	human	BLOOD	PrimaryCell	13_Het_E044.bed	1	31559
hyper	87	chromHMM_state13_Het	0	0.512262	432	14	53	50	53	39	10148	59317	713762	chromHMM_state13_Het HepG2_Hepatocellular_Carcinoma human	HepG2_Hepatocellular_Carcinoma	NA	human	LIVER	CellLine	13_Het_E118.bed	1	51733
hyper	10	chromHMM_state13_Het	0	0.523759	381	14	50	54	54	39.3	8763	59368	715147	chromHMM_state13_Het HUES48_Cell_Line human	HUES48_Cell_Line	NA	human	ESC	PrimaryCulture	13_Het_E014.bed	1	55128
hyper	31	chromHMM_state13_Het	0	0.472078	689	14	70	34	70	39.3	17458	59060	706452	chromHMM_state13_Het CD56_Primary_Cells human	CD56_Primary_Cells	NA	human	BLOOD	PrimaryCell	13_Het_E046.bed	1	49783
hyper	38	chromHMM_state13_Het	0	0.443963	757	14	76	28	76	39.3	20336	58992	703574	chromHMM_state13_Het Penis_Foreskin_Keratinocyte_Primary_Cells_skin03 human	Penis_Foreskin_Keratinocyte_Primary_Cells_skin03	NA	human	SKIN	PrimaryCulture	13_Het_E058.bed	1	52409
hyper	14	chromHMM_state13_Het	0	0.561477	306	14	41	65	65	40	6577	59443	717333	chromHMM_state13_Het iPS-18_Cell_Line human	iPS-18_Cell_Line	NA	human	IPSC	PrimaryCulture	13_Het_E019.bed	1	45568
hyper	74	chromHMM_state13_Het	0	0.584074	252	14	33	73	73	40	5212	59497	718698	chromHMM_state13_Het Rectal_Smooth_Muscle human	Rectal_Smooth_Muscle	NA	human	GI_RECTUM	PrimaryTissue	13_Het_E103.bed	1	14135
hyper	35	chromHMM_state13_Het	0	0.501042	432	14	61	50	61	41.7	10372	59317	713538	chromHMM_state13_Het Mobilized_CD34_Primary_Cells_Female human	Mobilized_CD34_Primary_Cells_Female	NA	human	BLOOD	PrimaryCell	13_Het_E050.bed	1	52949
hyper	19	chromHMM_state13_Het	0	0.3823	877	14	92	22	92	42.7	27150	58872	696760	chromHMM_state13_Het CD14_Primary_Cells human	CD14_Primary_Cells	NA	human	BLOOD	PrimaryCell	13_Het_E029.bed	1	97961
hyper	58	chromHMM_state13_Het	0	0.447426	552	14	75	41	75	43.3	14779	59197	709131	chromHMM_state13_Het Fetal_Intestine_Small human	Fetal_Intestine_Small	NA	human	GI_INTESTINE	PrimaryTissue	13_Het_E085.bed	1	66237
hyper	20	chromHMM_state13_Het	0	0.501971	345	14	60	58	60	44	8280	59404	715630	chromHMM_state13_Het CD19_Primary_Cells_Peripheral_UW human	CD19_Primary_Cells_Peripheral_UW	NA	human	BLOOD	PrimaryCell	13_Het_E032.bed	1	42573
hyper	27	chromHMM_state13_Het	0	0.541567	262	14	48	71	71	44.3	5840	59487	718070	chromHMM_state13_Het CD4+_CD25-_IL17+_PMA-Ionomcyin_stimulated_Th17_Primary_Cell	CD4+_CD25-_IL17+_PMA-Ionomcyin_stimulated_Th17_Primary_Cells	NA	human	BLOOD	PrimaryCell	13_Het_E042.bed	1	18209
hyper	44	chromHMM_state13_Het	0	0.454861	449	14	73	48	73	45	11853	59300	712057	chromHMM_state13_Het Adult_Liver human	Adult_Liver	NA	human	LIVER	PrimaryTissue	13_Het_E066.bed	1	56706
hyper	15	chromHMM_state13_Het	0	0.490054	345	14	64	58	64	45.3	8479	59404	715431	chromHMM_state13_Het iPS-20b_Cell_Line human	iPS-20b_Cell_Line	NA	human	IPSC	PrimaryCulture	13_Het_E020.bed	1	60370
hyper	50	chromHMM_state13_Het	0	0.512196	228	14	54	75	75	47.7	5374	59521	718536	chromHMM_state13_Het Brain_Mid_Frontal_Lobe human	Brain_Mid_Frontal_Lobe	NA	human	BRAIN	PrimaryTissue	13_Het_E073.bed	1	25626
hyper	12	chromHMM_state13_Het	0	0.463194	341	14	71	60	71	48.3	8861	59408	715049	chromHMM_state13_Het HUES64_Cell_Line human	HUES64_Cell_Line	NA	human	ESC	PrimaryCulture	13_Het_E016.bed	1	65605
hyper	25	chromHMM_state13_Het	0	0.542552	191	14	46	86	86	48.7	4254	59558	719656	chromHMM_state13_Het CD4+_CD25-_CD45RO+_Memory_Primary_Cells human	CD4+_CD25-_CD45RO+_Memory_Primary_Cells	NA	human	BLOOD	PrimaryCell	13_Het_E040.bed	1	18770
hyper	73	chromHMM_state13_Het	0	0.477663	309	14	68	64	68	48.7	7794	59440	716116	chromHMM_state13_Het Rectal_Mucosa.Donor_31 human	Rectal_Mucosa.Donor_31	NA	human	GI_RECTUM	PrimaryTissue	13_Het_E102.bed	1	21270
hyper	59	chromHMM_state13_Het	0	0.437971	346	14	78	57	78	49.7	9501	59403	714409	chromHMM_state13_Het Pancreatic_Islets human	Pancreatic_Islets	NA	human	PANCREAS	PrimaryTissue	13_Het_E087.bed	1	52547
hyper	78	chromHMM_state13_Het	0	0.485207	263	14	65	70	70	49.7	6537	59486	717373	chromHMM_state13_Het Skeletal_Muscle_Female human	Skeletal_Muscle_Female	NA	human	MUSCLE	PrimaryTissue	13_Het_E108.bed	1	20387
hyper	77	chromHMM_state13_Het	0	0.439309	338	14	77	61	77	50.7	9255	59411	714655	chromHMM_state13_Het Sigmoid_Colon human	Sigmoid_Colon	NA	human	GI_COLON	PrimaryTissue	13_Het_E106.bed	1	34299
hyper	49	chromHMM_state13_Het	0	0.480093	259	14	67	72	72	51	6506	59490	717404	chromHMM_state13_Het Brain_Inferior_Temporal_Lobe human	Brain_Inferior_Temporal_Lobe	NA	human	BRAIN	PrimaryTissue	13_Het_E072.bed	1	34083
hyper	66	chromHMM_state13_Het	0	0.379457	394	14	93	53	93	53.3	12446	59355	711464	chromHMM_state13_Het Left_Ventricle human	Left_Ventricle	NA	human	HEART	PrimaryTissue	13_Het_E095.bed	1	42990
hyper	63	chromHMM_state13_Het	0	0.433864	291	14	79	68	79	53.7	8075	59458	715835	chromHMM_state13_Het Fetal_Stomach human	Fetal_Stomach	NA	human	GI_STOMACH	PrimaryTissue	13_Het_E092.bed	1	46002
hyper	61	chromHMM_state13_Het	0	0.42224	295	14	81	67	81	54	8408	59454	715502	chromHMM_state13_Het Fetal_Muscle_Leg human	Fetal_Muscle_Leg	NA	human	MUSCLE_LEG	PrimaryTissue	13_Het_E090.bed	1	51404
hyper	30	chromHMM_state13_Het	0	0.50524	138	14	57	93	93	54.7	3302	59611	720608	chromHMM_state13_Het CD4+_CD25int_CD127+_Tmem_Primary_Cells human	CD4+_CD25int_CD127+_Tmem_Primary_Cells	NA	human	BLOOD	PrimaryCell	13_Het_E045.bed	1	13450
hyper	93	chromHMM_state13_Het	0	0.325834	362	14	98	55	98	55.7	13294	59387	710616	chromHMM_state13_Het Monocytes-CD14+_RO01746 human	Monocytes-CD14+_RO01746	NA	human	BLOOD	PrimaryCell	13_Het_E124.bed	1	46404
hyper	45	chromHMM_state13_Het	0	0.491185	162	14	63	91	91	56	3985	59587	719925	chromHMM_state13_Het Brain_Angular_Gyrus human	Brain_Angular_Gyrus	NA	human	BRAIN	PrimaryTissue	13_Het_E067.bed	1	22768
hyper	51	chromHMM_state13_Het	0	0.463117	202	14	72	84	84	56.7	5264	59547	718646	chromHMM_state13_Het Brain_Substantia_Nigra human	Brain_Substantia_Nigra	NA	human	BRAIN	PrimaryTissue	13_Het_E074.bed	1	31135
hyper	42	chromHMM_state13_Het	0	0.402086	279	14	88	69	88	57	8349	59470	715561	chromHMM_state13_Het Adipose_Nuclei human	Adipose_Nuclei	NA	human	FAT	PrimaryTissue	13_Het_E063.bed	1	54985
hyper	24	chromHMM_state13_Het	0	0.451222	193	14	74	85	85	57.7	5162	59556	718748	chromHMM_state13_Het CD4+_CD25-_CD45RA+_Naive_Primary_Cells human	CD4+_CD25-_CD45RA+_Naive_Primary_Cells	NA	human	BLOOD	PrimaryCell	13_Het_E039.bed	1	19753
hyper	46	chromHMM_state13_Het	0	0.414118	224	14	83	76	83	57.7	6519	59525	717391	chromHMM_state13_Het Brain_Anterior_Caudate human	Brain_Anterior_Caudate	NA	human	BRAIN	PrimaryTissue	13_Het_E068.bed	1	42017
hyper	71	chromHMM_state13_Het	0	0.335206	306	14	97	65	97	58.7	10949	59443	712961	chromHMM_state13_Het Psoas_Muscle human	Psoas_Muscle	NA	human	MUSCLE	PrimaryTissue	13_Het_E100.bed	1	46521
hyper	54	chromHMM_state13_Het	0	0.407818	222	14	86	77	86	59	6560	59527	717350	chromHMM_state13_Het Duodenum_Smooth_Muscle human	Duodenum_Smooth_Muscle	NA	human	GI_DUODENUM	PrimaryTissue	13_Het_E078.bed	1	42592
hyper	53	chromHMM_state13_Het	0	0.473474	114	14	69	96	96	59.7	2911	59635	720999	chromHMM_state13_Het Colon_Smooth_Muscle human	Colon_Smooth_Muscle	NA	human	GI_COLON	PrimaryTissue	13_Het_E076.bed	1	15259
hyper	28	chromHMM_state13_Het	0	0.408345	212	14	85	83	85	60.7	6258	59537	717652	chromHMM_state13_Het CD4+_CD25-_Th_Primary_Cells human	CD4+_CD25-_Th_Primary_Cells	NA	human	BLOOD	PrimaryCell	13_Het_E043.bed	1	28718
hyper	47	chromHMM_state13_Het	0	0.427168	174	14	80	88	88	60.7	4916	59575	718994	chromHMM_state13_Het Brain_Cingulate_Gyrus human	Brain_Cingulate_Gyrus	NA	human	BRAIN	PrimaryTissue	13_Het_E069.bed	1	27097
hyper	48	chromHMM_state13_Het	0	0.390998	218	14	91	79	91	61.3	6717	59531	717193	chromHMM_state13_Het Brain_Hippocampus_Middle human	Brain_Hippocampus_Middle	NA	human	BRAIN	PrimaryTissue	13_Het_E071.bed	1	38258
hyper	56	chromHMM_state13_Het	0	0.395887	215	14	89	81	89	61.3	6544	59534	717366	chromHMM_state13_Het Fetal_Adrenal_Gland human	Fetal_Adrenal_Gland	NA	human	ADRENAL	PrimaryTissue	13_Het_E080.bed	1	44258
hyper	80	chromHMM_state13_Het	0	0.393788	216	14	90	80	90	61.3	6609	59533	717301	chromHMM_state13_Het Stomach_Smooth_Muscle human	Stomach_Smooth_Muscle	NA	human	GI_STOMACH	PrimaryTissue	13_Het_E111.bed	1	29369
hyper	41	chromHMM_state13_Het	0	0.35849	221	14	95	78	95	62.3	7420	59528	716490	chromHMM_state13_Het Peripheral_Blood_Mononuclear_Primary_Cells human	Peripheral_Blood_Mononuclear_Primary_Cells	NA	human	BLOOD	PrimaryCell	13_Het_E062.bed	1	29691
hyper	26	chromHMM_state13_Het	0	0.412855	163	14	84	90	90	62.7	4765	59586	719145	chromHMM_state13_Het CD4+_CD25-_IL17-_PMA-Ionomycin_stimulated_MACS_purified_Th_	CD4+_CD25-_IL17-_PMA-Ionomycin_stimulated_MACS_purified_Th_Primary_Cells	NA	human	BLOOD	PrimaryCell	13_Het_E041.bed	1	22519
hyper	76	chromHMM_state13_Het	0	0.350824	215	14	96	81	96	63.7	7376	59534	716534	chromHMM_state13_Het Right_Ventricle human	Right_Ventricle	NA	human	HEART	PrimaryTissue	13_Het_E105.bed	1	29076
hyper	21	chromHMM_state13_Het	0	0.403093	143	14	87	92	92	64.3	4283	59606	719627	chromHMM_state13_Het CD3_Primary_Cells_Peripheral_UW human	CD3_Primary_Cells_Peripheral_UW	NA	human	BLOOD	PrimaryCell	13_Het_E034.bed	1	22240
hyper	79	chromHMM_state13_Het	0	0.417845	99	14	82	98	98	64.7	2864	59650	721046	chromHMM_state13_Het Small_Intestine human	Small_Intestine	NA	human	GI_INTESTINE	PrimaryTissue	13_Het_E109.bed	1	11701
hyper	60	chromHMM_state13_Het	0	0.374901	168	14	94	89	94	65.7	5404	59581	718506	chromHMM_state13_Het Fetal_Muscle_Trunk human	Fetal_Muscle_Trunk	NA	human	MUSCLE	PrimaryTissue	13_Het_E089.bed	1	34163
hyper	11	chromHMM_state14_TssBiv	Inf	4.98829	15966	1	3	1	3	1.67	49315	43783	674595	chromHMM_state14_TssBiv HUES6_Cell_Line human	HUES6_Cell_Line	NA	human	ESC	PrimaryCulture	14_TssBiv_E015.bed	0	13426
hyper	15	chromHMM_state14_TssBiv	Inf	4.40396	14288	1	7	3	7	3.67	48221	45461	675689	chromHMM_state14_TssBiv iPS-20b_Cell_Line human	iPS-20b_Cell_Line	NA	human	IPSC	PrimaryCulture	14_TssBiv_E020.bed	0	15930
hyper	10	chromHMM_state14_TssBiv	Inf	4.57653	12754	1	6	5	6	4	40525	46995	683385	chromHMM_state14_TssBiv HUES48_Cell_Line human	HUES48_Cell_Line	NA	human	ESC	PrimaryCulture	14_TssBiv_E014.bed	0	12800
hyper	12	chromHMM_state14_TssBiv	Inf	4.34333	14429	1	9	2	9	4	49441	45320	674469	chromHMM_state14_TssBiv HUES64_Cell_Line human	HUES64_Cell_Line	NA	human	ESC	PrimaryCulture	14_TssBiv_E016.bed	0	13394
hyper	14	chromHMM_state14_TssBiv	Inf	4.36524	14086	1	8	4	8	4.33	47780	45663	676130	chromHMM_state14_TssBiv iPS-18_Cell_Line human	iPS-18_Cell_Line	NA	human	IPSC	PrimaryCulture	14_TssBiv_E019.bed	0	15107
hyper	17	chromHMM_state14_TssBiv	Inf	4.69286	7971	1	4	9	9	4.67	22993	51778	700917	chromHMM_state14_TssBiv iPS_DF_19.11_Cell_Line human	iPS_DF_19.11_Cell_Line	NA	human	IPSC	PrimaryCulture	14_TssBiv_E022.bed	0	7733
hyper	6	chromHMM_state14_TssBiv	Inf	5.73312	7408	1	1	14	14	5.33	17439	52341	706471	chromHMM_state14_TssBiv H9_Cell_Line human	H9_Cell_Line	NA	human	ESC	PrimaryCulture	14_TssBiv_E008.bed	0	7333
hyper	1	chromHMM_state14_TssBiv	Inf	4.2266	12577	1	14	6	14	7	42956	47172	680954	chromHMM_state14_TssBiv H1_Cell_Line human	H1_Cell_Line	NA	human	ESC	PrimaryCulture	14_TssBiv_E003.bed	0	11147
hyper	7	chromHMM_state14_TssBiv	Inf	4.26092	7089	1	10	16	16	9	22171	52660	701739	chromHMM_state14_TssBiv hESC_Derived_CD184+_Endoderm_Cultured_Cells human	hESC_Derived_CD184+_Endoderm_Cultured_Cells	NA	human	ESC_DERIVED	ESCDerived	14_TssBiv_E011.bed	0	8080
hyper	16	chromHMM_state14_TssBiv	Inf	4.66386	5935	1	5	23	23	9.67	16723	53814	707187	chromHMM_state14_TssBiv iPS_DF_6.9_Cell_Line human	iPS_DF_6.9_Cell_Line	NA	human	IPSC	PrimaryCulture	14_TssBiv_E021.bed	0	6816
hyper	36	chromHMM_state14_TssBiv	Inf	3.43623	8198	1	30	8	30	13	32020	51551	691890	chromHMM_state14_TssBiv Penis_Foreskin_Fibroblast_Primary_Cells_skin01 human	Penis_Foreskin_Fibroblast_Primary_Cells_skin01	NA	human	SKIN	PrimaryCulture	14_TssBiv_E055.bed	0	10050
hyper	80	chromHMM_state14_TssBiv	Inf	3.68106	6866	1	20	18	20	13	24661	52883	699249	chromHMM_state14_TssBiv Stomach_Smooth_Muscle human	Stomach_Smooth_Muscle	NA	human	GI_STOMACH	PrimaryTissue	14_TssBiv_E111.bed	0	9206
hyper	54	chromHMM_state14_TssBiv	Inf	3.65334	6970	1	22	17	22	13.3	25253	52779	698657	chromHMM_state14_TssBiv Duodenum_Smooth_Muscle human	Duodenum_Smooth_Muscle	NA	human	GI_DUODENUM	PrimaryTissue	14_TssBiv_E078.bed	0	7690
hyper	48	chromHMM_state14_TssBiv	Inf	3.97573	5399	1	15	26	26	14	17648	54350	706262	chromHMM_state14_TssBiv Brain_Hippocampus_Middle human	Brain_Hippocampus_Middle	NA	human	BRAIN	PrimaryTissue	14_TssBiv_E071.bed	0	5753
hyper	8	chromHMM_state14_TssBiv	Inf	3.32879	10194	1	35	7	35	14.3	42132	49555	681778	chromHMM_state14_TssBiv hESC_Derived_CD56+_Ectoderm_Cultured_Cells human	hESC_Derived_CD56+_Ectoderm_Cultured_Cells	NA	human	ESC_DERIVED	ESCDerived	14_TssBiv_E012.bed	0	10754
hyper	58	chromHMM_state14_TssBiv	Inf	3.44638	6341	1	29	19	29	16.3	24108	53408	699802	chromHMM_state14_TssBiv Fetal_Intestine_Small human	Fetal_Intestine_Small	NA	human	GI_INTESTINE	PrimaryTissue	14_TssBiv_E085.bed	0	7198
hyper	37	chromHMM_state14_TssBiv	Inf	3.179	7760	1	39	12	39	17.3	32465	51989	691445	chromHMM_state14_TssBiv Penis_Foreskin_Fibroblast_Primary_Cells_skin02 human	Penis_Foreskin_Fibroblast_Primary_Cells_skin02	NA	human	SKIN	PrimaryCulture	14_TssBiv_E056.bed	0	14992
hyper	9	chromHMM_state14_TssBiv	Inf	3.68768	4282	1	19	33	33	17.7	14843	55467	709067	chromHMM_state14_TssBiv hESC_Derived_CD56+_Mesoderm_Cultured_Cells human	hESC_Derived_CD56+_Mesoderm_Cultured_Cells	NA	human	ESC_DERIVED	ESCDerived	14_TssBiv_E013.bed	0	4825
hyper	42	chromHMM_state14_TssBiv	Inf	3.64674	4963	1	23	30	30	18	17546	54786	706364	chromHMM_state14_TssBiv Adipose_Nuclei human	Adipose_Nuclei	NA	human	FAT	PrimaryTissue	14_TssBiv_E063.bed	0	6259
hyper	60	chromHMM_state14_TssBiv	Inf	3.03325	7848	1	44	10	44	18.3	34374	51901	689536	chromHMM_state14_TssBiv Fetal_Muscle_Trunk human	Fetal_Muscle_Trunk	NA	human	MUSCLE	PrimaryTissue	14_TssBiv_E089.bed	0	10021
hyper	61	chromHMM_state14_TssBiv	Inf	3.08446	7238	1	41	15	41	19	30966	52511	692944	chromHMM_state14_TssBiv Fetal_Muscle_Leg human	Fetal_Muscle_Leg	NA	human	MUSCLE_LEG	PrimaryTissue	14_TssBiv_E090.bed	0	8130
hyper	57	chromHMM_state14_TssBiv	Inf	3.25197	6082	1	37	20	37	19.3	24378	53667	699532	chromHMM_state14_TssBiv Fetal_Intestine_Large human	Fetal_Intestine_Large	NA	human	GI_INTESTINE	PrimaryTissue	14_TssBiv_E084.bed	0	7093
hyper	63	chromHMM_state14_TssBiv	Inf	3.00394	7721	1	46	13	46	20	34079	52028	689831	chromHMM_state14_TssBiv Fetal_Stomach human	Fetal_Stomach	NA	human	GI_STOMACH	PrimaryTissue	14_TssBiv_E092.bed	0	8724
hyper	74	chromHMM_state14_TssBiv	Inf	3.77903	3378	1	17	42	42	20	11299	56371	712611	chromHMM_state14_TssBiv Rectal_Smooth_Muscle human	Rectal_Smooth_Muscle	NA	human	GI_RECTUM	PrimaryTissue	14_TssBiv_E103.bed	0	5417
hyper	2	chromHMM_state14_TssBiv	Inf	3.63138	3681	1	25	37	37	21	12855	56068	711055	chromHMM_state14_TssBiv H1_BMP4_Derived_Mesendoderm_Cultured_Cells human	H1_BMP4_Derived_Mesendoderm_Cultured_Cells	NA	human	ESC_DERIVED	ESCDerived	14_TssBiv_E004.bed	0	5276
hyper	56	chromHMM_state14_TssBiv	Inf	2.95041	7832	1	51	11	51	21	35214	51917	688696	chromHMM_state14_TssBiv Fetal_Adrenal_Gland human	Fetal_Adrenal_Gland	NA	human	ADRENAL	PrimaryTissue	14_TssBiv_E080.bed	0	8977
hyper	47	chromHMM_state14_TssBiv	Inf	3.6089	4057	1	28	36	36	21.7	14323	55692	709587	chromHMM_state14_TssBiv Brain_Cingulate_Gyrus human	Brain_Cingulate_Gyrus	NA	human	BRAIN	PrimaryTissue	14_TssBiv_E069.bed	0	5643
hyper	49	chromHMM_state14_TssBiv	Inf	3.63931	3395	1	24	41	41	22	11788	56354	712122	chromHMM_state14_TssBiv Brain_Inferior_Temporal_Lobe human	Brain_Inferior_Temporal_Lobe	NA	human	BRAIN	PrimaryTissue	14_TssBiv_E072.bed	0	4886
hyper	76	chromHMM_state14_TssBiv	Inf	4.23067	2549	1	12	53	53	22	7546	57200	716364	chromHMM_state14_TssBiv Right_Ventricle human	Right_Ventricle	NA	human	HEART	PrimaryTissue	14_TssBiv_E105.bed	0	2764
hyper	35	chromHMM_state14_TssBiv	Inf	3.01872	6018	1	45	21	45	22.3	25898	53731	698012	chromHMM_state14_TssBiv Mobilized_CD34_Primary_Cells_Female human	Mobilized_CD34_Primary_Cells_Female	NA	human	BLOOD	PrimaryCell	14_TssBiv_E050.bed	0	7001
hyper	46	chromHMM_state14_TssBiv	Inf	4.23041	2471	1	13	54	54	22.7	7308	57278	716602	chromHMM_state14_TssBiv Brain_Anterior_Caudate human	Brain_Anterior_Caudate	NA	human	BRAIN	PrimaryTissue	14_TssBiv_E068.bed	0	3687
hyper	94	chromHMM_state14_TssBiv	Inf	3.62957	3347	1	26	43	43	23.3	11645	56402	712265	chromHMM_state14_TssBiv NH-A_Astrocytes human	NH-A_Astrocytes	NA	human	BRAIN	PrimaryCulture	14_TssBiv_E125.bed	0	4804
hyper	38	chromHMM_state14_TssBiv	Inf	2.98588	5964	1	48	22	48	23.7	25921	53785	697989	chromHMM_state14_TssBiv Penis_Foreskin_Keratinocyte_Primary_Cells_skin03 human	Penis_Foreskin_Keratinocyte_Primary_Cells_skin03	NA	human	SKIN	PrimaryCulture	14_TssBiv_E058.bed	0	6485
hyper	78	chromHMM_state14_TssBiv	Inf	3.07697	5034	1	42	29	42	24	21017	54715	702893	chromHMM_state14_TssBiv Skeletal_Muscle_Female human	Skeletal_Muscle_Female	NA	human	MUSCLE	PrimaryTissue	14_TssBiv_E108.bed	0	7590
hyper	50	chromHMM_state14_TssBiv	Inf	3.60924	2827	1	27	48	48	25.3	9826	56922	714084	chromHMM_state14_TssBiv Brain_Mid_Frontal_Lobe human	Brain_Mid_Frontal_Lobe	NA	human	BRAIN	PrimaryTissue	14_TssBiv_E073.bed	0	4273
hyper	71	chromHMM_state14_TssBiv	Inf	3.28292	3543	1	36	39	39	25.3	13638	56206	710272	chromHMM_state14_TssBiv Psoas_Muscle human	Psoas_Muscle	NA	human	MUSCLE	PrimaryTissue	14_TssBiv_E100.bed	0	4664
hyper	52	chromHMM_state14_TssBiv	Inf	3.00159	4956	1	47	31	47	26.3	21176	54793	702734	chromHMM_state14_TssBiv Colonic_Mucosa human	Colonic_Mucosa	NA	human	GI_COLON	PrimaryTissue	14_TssBiv_E075.bed	0	6500
hyper	72	chromHMM_state14_TssBiv	Inf	3.35986	3242	1	34	45	45	26.7	12154	56507	711756	chromHMM_state14_TssBiv Rectal_Mucosa.Donor_29 human	Rectal_Mucosa.Donor_29	NA	human	GI_RECTUM	PrimaryTissue	14_TssBiv_E101.bed	0	5775
hyper	39	chromHMM_state14_TssBiv	Inf	2.94728	5086	1	52	28	52	27	22154	54663	701756	chromHMM_state14_TssBiv Penis_Foreskin_Melanocyte_Primary_Cells_skin01 human	Penis_Foreskin_Melanocyte_Primary_Cells_skin01	NA	human	SKIN	PrimaryCulture	14_TssBiv_E059.bed	0	8651
hyper	51	chromHMM_state14_TssBiv	Inf	3.83506	1811	1	16	67	67	28	5852	57938	718058	chromHMM_state14_TssBiv Brain_Substantia_Nigra human	Brain_Substantia_Nigra	NA	human	BRAIN	PrimaryTissue	14_TssBiv_E074.bed	0	3208
hyper	40	chromHMM_state14_TssBiv	Inf	2.85558	5090	1	57	27	57	28.3	22860	54659	701050	chromHMM_state14_TssBiv Penis_Foreskin_Melanocyte_Primary_Cells_skin03 human	Penis_Foreskin_Melanocyte_Primary_Cells_skin03	NA	human	SKIN	PrimaryCulture	14_TssBiv_E061.bed	0	5518
hyper	45	chromHMM_state14_TssBiv	Inf	3.65961	1731	1	21	69	69	30.3	5854	58018	718056	chromHMM_state14_TssBiv Brain_Angular_Gyrus human	Brain_Angular_Gyrus	NA	human	BRAIN	PrimaryTissue	14_TssBiv_E067.bed	0	3185
hyper	96	chromHMM_state14_TssBiv	Inf	2.84705	4265	1	58	34	58	31	19030	55484	704880	chromHMM_state14_TssBiv NHEK-Epidermal_Keratinocytes human	NHEK-Epidermal_Keratinocytes	NA	human	SKIN	PrimaryCulture	14_TssBiv_E127.bed	0	5894
hyper	34	chromHMM_state14_TssBiv	Inf	2.96808	3318	1	49	44	49	31.3	14062	56431	709848	chromHMM_state14_TssBiv Chondrocytes_from_Bone_Marrow_Derived_Mesenchymal_Stem_C	Chondrocytes_from_Bone_Marrow_Derived_Mesenchymal_Stem_Cell_Cultured_Cells	NA	human	STROMAL_CONNECTIVE	PrimaryCulture	14_TssBiv_E049.bed	0	5079
hyper	4	chromHMM_state14_TssBiv	Inf	3.42756	2046	1	32	62	62	31.7	7412	57703	716498	chromHMM_state14_TssBiv H1_Derived_Mesenchymal_Stem_Cells human	H1_Derived_Mesenchymal_Stem_Cells	NA	human	ESC_DERIVED	ESCDerived	14_TssBiv_E006.bed	0	4691
hyper	53	chromHMM_state14_TssBiv	Inf	3.06313	2677	1	43	52	52	32	10918	57072	712992	chromHMM_state14_TssBiv Colon_Smooth_Muscle human	Colon_Smooth_Muscle	NA	human	GI_COLON	PrimaryTissue	14_TssBiv_E076.bed	0	4482
hyper	81	chromHMM_state14_TssBiv	Inf	2.27281	5930	1	72	24	72	32.3	33471	53819	690439	chromHMM_state14_TssBiv Thymus human	Thymus	NA	human	THYMUS	PrimaryTissue	14_TssBiv_E112.bed	0	7049
hyper	93	chromHMM_state14_TssBiv	Inf	2.2574	5646	1	73	25	73	33	31986	54103	691924	chromHMM_state14_TssBiv Monocytes-CD14+_RO01746 human	Monocytes-CD14+_RO01746	NA	human	BLOOD	PrimaryCell	14_TssBiv_E124.bed	0	8223
hyper	3	chromHMM_state14_TssBiv	Inf	2.7279	3542	1	61	40	61	34	16345	56207	707565	chromHMM_state14_TssBiv H1_BMP4_Derived_Trophoblast_Cultured_Cells human	H1_BMP4_Derived_Trophoblast_Cultured_Cells	NA	human	ESC_DERIVED	ESCDerived	14_TssBiv_E005.bed	0	6292
hyper	73	chromHMM_state14_TssBiv	Inf	2.96308	2686	1	50	51	51	34	11320	57063	712590	chromHMM_state14_TssBiv Rectal_Mucosa.Donor_31 human	Rectal_Mucosa.Donor_31	NA	human	GI_RECTUM	PrimaryTissue	14_TssBiv_E102.bed	0	4803
hyper	64	chromHMM_state14_TssBiv	Inf	2.12671	4145	1	78	35	78	38	24515	55604	699395	chromHMM_state14_TssBiv Fetal_Thymus human	Fetal_Thymus	NA	human	THYMUS	PrimaryTissue	14_TssBiv_E093.bed	0	6977
hyper	89	chromHMM_state14_TssBiv	Inf	2.9331	2162	1	53	60	60	38	9149	57587	714761	chromHMM_state14_TssBiv HSMM_Skeletal_Muscle_Myoblasts human	HSMM_Skeletal_Muscle_Myoblasts	NA	human	MUSCLE	PrimaryCulture	14_TssBiv_E120.bed	0	3493
hyper	98	chromHMM_state14_TssBiv	Inf	2.62791	2792	1	64	49	64	38	13256	56957	710654	chromHMM_state14_TssBiv Osteoblasts human	Osteoblasts	NA	human	BONE	PrimaryCulture	14_TssBiv_E129.bed	0	4804
hyper	62	chromHMM_state14_TssBiv	Inf	2.72366	2323	1	62	58	62	40.3	10594	57426	713316	chromHMM_state14_TssBiv Fetal_Placenta human	Fetal_Placenta	NA	human	PLACENTA	PrimaryTissue	14_TssBiv_E091.bed	0	4272
hyper	24	chromHMM_state14_TssBiv	317.868	2.65908	2349	55	63	56	63	58	10972	57400	712938	chromHMM_state14_TssBiv CD4+_CD25-_CD45RA+_Naive_Primary_Cells human	CD4+_CD25-_CD45RA+_Naive_Primary_Cells	NA	human	BLOOD	PrimaryCell	14_TssBiv_E039.bed	3.00332624793977e-319	4223
hyper	5	chromHMM_state14_TssBiv	306.328	3.15576	1721	56	40	70	70	55.3	6740	58028	717170	chromHMM_state14_TssBiv H1_Derived_Neuronal_Progenitor_Cultured_Cells human	H1_Derived_Neuronal_Progenitor_Cultured_Cells	NA	human	ESC_DERIVED	ESCDerived	14_TssBiv_E007.bed	1.02138e-307	3855
hyper	87	chromHMM_state14_TssBiv	290.314	1.91653	4477	57	84	32	84	57.7	29355	55272	694555	chromHMM_state14_TssBiv HepG2_Hepatocellular_Carcinoma human	HepG2_Hepatocellular_Carcinoma	NA	human	LIVER	CellLine	14_TssBiv_E118.bed	1.03671e-291	11399
hyper	66	chromHMM_state14_TssBiv	285.238	2.88181	1837	58	56	66	66	60	7882	57912	716028	chromHMM_state14_TssBiv Left_Ventricle human	Left_Ventricle	NA	human	HEART	PrimaryTissue	14_TssBiv_E095.bed	1.21393e-286	3198
hyper	91	chromHMM_state14_TssBiv	281.557	2.51046	2304	59	66	59	66	61.3	11383	57445	712527	chromHMM_state14_TssBiv HUVEC_Umbilical_Vein_Endothelial_Cells human	HUVEC_Umbilical_Vein_Endothelial_Cells	NA	human	VASCULAR	PrimaryCulture	14_TssBiv_E122.bed	5.723e-283	3998
hyper	13	chromHMM_state14_TssBiv	270.019	2.15639	3044	60	77	47	77	61.3	17583	56705	706327	chromHMM_state14_TssBiv IMR90_Cell_Line human	IMR90_Cell_Line	NA	human	LUNG	CellLine	14_TssBiv_E017.bed	1.94311e-271	5306
hyper	95	chromHMM_state14_TssBiv	264.674	3.21067	1447	61	38	74	74	57.7	5553	58302	718357	chromHMM_state14_TssBiv NHDF-Ad_Adult_Dermal_Fibroblasts human	NHDF-Ad_Adult_Dermal_Fibroblasts	NA	human	SKIN	PrimaryCulture	14_TssBiv_E126.bed	4.22976e-266	2907
hyper	55	chromHMM_state14_TssBiv	262.814	2.90643	1667	62	55	72	72	63	7079	58082	716831	chromHMM_state14_TssBiv Esophagus human	Esophagus	NA	human	GI_ESOPHAGUS	PrimaryTissue	14_TssBiv_E079.bed	3.01464e-264	3035
hyper	18	chromHMM_state14_TssBiv	232.918	2.46058	1971	63	67	64	67	64.7	9899	57778	714011	chromHMM_state14_TssBiv Bone_Marrow_Derived_Mesenchymal_Stem_Cell_Cultured_Cells	Bone_Marrow_Derived_Mesenchymal_Stem_Cell_Cultured_Cells	NA	human	STROMAL_CONNECTIVE	PrimaryCulture	14_TssBiv_E026.bed	2.33419e-234	3613
hyper	29	chromHMM_state14_TssBiv	227.087	1.87828	3666	64	87	38	87	63	24347	56083	699563	chromHMM_state14_TssBiv CD4+_CD25+_CD127-_Treg_Primary_Cells human	CD4+_CD25+_CD127-_Treg_Primary_Cells	NA	human	BLOOD	PrimaryCell	14_TssBiv_E044.bed	1.55922e-228	6428
hyper	97	chromHMM_state14_TssBiv	214.865	2.5137	1742	65	65	68	68	66	8546	58007	715364	chromHMM_state14_TssBiv NHLF_Lung_Fibroblasts human	NHLF_Lung_Fibroblasts	NA	human	LUNG	PrimaryCulture	14_TssBiv_E128.bed	2.5538e-216	3353
hyper	83	chromHMM_state14_TssBiv	211.669	2.27713	2093	66	71	61	71	66	11359	57656	712551	chromHMM_state14_TssBiv A549_EtOH_0.02pct_Lung_Carcinoma human	A549_EtOH_0.02pct_Lung_Carcinoma	NA	human	LUNG	CellLine	14_TssBiv_E114.bed	3.95425e-213	3718
hyper	88	chromHMM_state14_TssBiv	210.781	2.3584	1936	67	69	65	69	67	10135	57813	713775	chromHMM_state14_TssBiv HMEC_Mammary_Epithelial human	HMEC_Mammary_Epithelial	NA	human	BREAST	PrimaryCulture	14_TssBiv_E119.bed	3.00689e-212	3114
hyper	59	chromHMM_state14_TssBiv	187.832	3.37694	953	68	33	80	80	60.3	3458	58796	720452	chromHMM_state14_TssBiv Pancreatic_Islets human	Pancreatic_Islets	NA	human	PANCREAS	PrimaryTissue	14_TssBiv_E087.bed	2.63937e-189	1737
hyper	26	chromHMM_state14_TssBiv	181.088	1.9911	2456	69	82	55	82	68.7	15257	57293	708653	chromHMM_state14_TssBiv CD4+_CD25-_IL17-_PMA-Ionomycin_stimulated_MACS_purified_	CD4+_CD25-_IL17-_PMA-Ionomycin_stimulated_MACS_purified_Th_Primary_Cells	NA	human	BLOOD	PrimaryCell	14_TssBiv_E041.bed	1.44131e-182	4748
hyper	28	chromHMM_state14_TssBiv	172.033	1.9914	2328	70	81	57	81	69.3	14444	57421	709466	chromHMM_state14_TssBiv CD4+_CD25-_Th_Primary_Cells human	CD4+_CD25-_Th_Primary_Cells	NA	human	BLOOD	PrimaryCell	14_TssBiv_E043.bed	1.61085e-173	4446
hyper	41	chromHMM_state14_TssBiv	163.691	1.76964	3135	71	89	46	89	68.7	21965	56614	701945	chromHMM_state14_TssBiv Peripheral_Blood_Mononuclear_Primary_Cells human	Peripheral_Blood_Mononuclear_Primary_Cells	NA	human	BLOOD	PrimaryCell	14_TssBiv_E062.bed	3.49792e-165	5945
hyper	68	chromHMM_state14_TssBiv	163.058	3.42917	809	72	31	81	81	61.3	2886	58940	721024	chromHMM_state14_TssBiv Ovary human	Ovary	NA	human	OVARY	PrimaryTissue	14_TssBiv_E097.bed	1.47998e-164	1415
hyper	90	chromHMM_state14_TssBiv	156.675	2.43632	1339	73	68	75	75	72	6748	58410	717162	chromHMM_state14_TssBiv HSMMtube_Skeletal_Muscle_Myotubes_Derived_from_HSMM huma	HSMMtube_Skeletal_Muscle_Myotubes_Derived_from_HSMM	NA	human	MUSCLE	PrimaryCulture	14_TssBiv_E121.bed	3.5238e-158	2630
hyper	27	chromHMM_state14_TssBiv	112.094	2.15835	1228	74	76	77	77	75.7	6970	58521	716940	chromHMM_state14_TssBiv CD4+_CD25-_IL17+_PMA-Ionomcyin_stimulated_Th17_Primary_C	CD4+_CD25-_IL17+_PMA-Ionomcyin_stimulated_Th17_Primary_Cells	NA	human	BLOOD	PrimaryCell	14_TssBiv_E042.bed	1.32629e-113	3197
hyper	30	chromHMM_state14_TssBiv	106.802	1.87859	1672	75	86	71	86	77.3	10927	58077	712983	chromHMM_state14_TssBiv CD4+_CD25int_CD127+_Tmem_Primary_Cells human	CD4+_CD25int_CD127+_Tmem_Primary_Cells	NA	human	BLOOD	PrimaryCell	14_TssBiv_E045.bed	2.56292e-108	3873
hyper	70	chromHMM_state14_TssBiv	103.827	2.27769	1008	76	70	79	79	75	5413	58741	718497	chromHMM_state14_TssBiv Placenta_Amnion human	Placenta_Amnion	NA	human	PLACENTA	PrimaryTissue	14_TssBiv_E099.bed	2.3878e-105	2341
hyper	67	chromHMM_state14_TssBiv	100.198	3.68922	450	77	18	89	89	61.3	1486	59299	722424	chromHMM_state14_TssBiv Lung human	Lung	NA	human	LUNG	PrimaryTissue	14_TssBiv_E096.bed	1.00234e-101	1340
hyper	85	chromHMM_state14_TssBiv	99.1063	1.98357	1332	78	83	76	83	79	8227	58417	715683	chromHMM_state14_TssBiv GM12878_Lymphoblastoid human	GM12878_Lymphoblastoid	NA	human	BLOOD	PrimaryCulture	14_TssBiv_E116.bed	1.22237e-100	3537
hyper	79	chromHMM_state14_TssBiv	91.1708	2.81106	598	79	59	84	84	74	2594	59151	721316	chromHMM_state14_TssBiv Small_Intestine human	Small_Intestine	NA	human	GI_INTESTINE	PrimaryTissue	14_TssBiv_E109.bed	1.04028e-92	1625
hyper	44	chromHMM_state14_TssBiv	86.9721	2.81082	570	80	60	86	86	75.3	2472	59179	721438	chromHMM_state14_TssBiv Adult_Liver human	Adult_Liver	NA	human	LIVER	PrimaryTissue	14_TssBiv_E066.bed	1.62314e-88	1401
hyper	19	chromHMM_state14_TssBiv	79.4621	1.62696	1990	81	90	63	90	78	15012	57759	708898	chromHMM_state14_TssBiv CD14_Primary_Cells human	CD14_Primary_Cells	NA	human	BLOOD	PrimaryCell	14_TssBiv_E029.bed	5.18757e-81	4949
hyper	21	chromHMM_state14_TssBiv	68.6104	1.46573	2709	82	94	50	94	75.3	22720	57040	701190	chromHMM_state14_TssBiv CD3_Primary_Cells_Peripheral_UW human	CD3_Primary_Cells_Peripheral_UW	NA	human	BLOOD	PrimaryCell	14_TssBiv_E034.bed	3.64226e-70	6520
hyper	75	chromHMM_state14_TssBiv	67.7855	5.51298	201	83	2	95	95	60	443	59548	723467	chromHMM_state14_TssBiv Right_Atrium human	Right_Atrium	NA	human	HEART	PrimaryTissue	14_TssBiv_E104.bed	2.40451e-69	616
hyper	82	chromHMM_state14_TssBiv	64.8124	2.91284	399	84	54	92	92	76.7	1667	59350	722243	chromHMM_state14_TssBiv Spleen human	Spleen	NA	human	SPLEEN	PrimaryTissue	14_TssBiv_E113.bed	2.23306e-66	1476
hyper	77	chromHMM_state14_TssBiv	51.4004	2.10881	582	85	79	85	85	83	3361	59167	720549	chromHMM_state14_TssBiv Sigmoid_Colon human	Sigmoid_Colon	NA	human	GI_COLON	PrimaryTissue	14_TssBiv_E106.bed	5.69828e-53	2032
hyper	20	chromHMM_state14_TssBiv	50.6676	1.5653	1454	86	92	73	92	83.7	11354	58295	712556	chromHMM_state14_TssBiv CD19_Primary_Cells_Peripheral_UW human	CD19_Primary_Cells_Peripheral_UW	NA	human	BLOOD	PrimaryCell	14_TssBiv_E032.bed	3.04411e-52	3658
hyper	23	chromHMM_state14_TssBiv	43.3853	1.90492	634	87	85	83	87	85	4053	59115	719857	chromHMM_state14_TssBiv CD4_Naive_Primary_Cells human	CD4_Naive_Primary_Cells	NA	human	BLOOD	PrimaryCell	14_TssBiv_E038.bed	5.76438e-45	2251
hyper	31	chromHMM_state14_TssBiv	28.3438	1.45265	1115	88	95	78	95	87	9354	58634	714556	chromHMM_state14_TssBiv CD56_Primary_Cells human	CD56_Primary_Cells	NA	human	BLOOD	PrimaryCell	14_TssBiv_E046.bed	6.27129e-30	3110
hyper	43	chromHMM_state14_TssBiv	24.7367	2.25677	234	89	74	93	93	85.3	1259	59515	722651	chromHMM_state14_TssBiv Aorta human	Aorta	NA	human	VASCULAR	PrimaryTissue	14_TssBiv_E065.bed	2.5089e-26	1056
hyper	22	chromHMM_state14_TssBiv	23.976	1.79984	403	90	88	91	91	89.7	2721	59346	721189	chromHMM_state14_TssBiv CD4_Memory_Primary_Cells human	CD4_Memory_Primary_Cells	NA	human	BLOOD	PrimaryCell	14_TssBiv_E037.bed	1.43001e-25	1648
hyper	32	chromHMM_state14_TssBiv	21.5114	1.53232	647	91	93	82	93	88.7	5135	59102	718775	chromHMM_state14_TssBiv CD8_Naive_Primary_Cells human	CD8_Naive_Primary_Cells	NA	human	BLOOD	PrimaryCell	14_TssBiv_E047.bed	4.12205e-23	2370
hyper	33	chromHMM_state14_TssBiv	19.7666	1.61123	481	92	91	87	92	90	3628	59268	720282	chromHMM_state14_TssBiv CD8_Memory_Primary_Cells human	CD8_Memory_Primary_Cells	NA	human	BLOOD	PrimaryCell	14_TssBiv_E048.bed	2.26596e-21	2167
hyper	65	chromHMM_state14_TssBiv	18.3435	4.23178	67	93	11	97	97	67	192	59682	723718	chromHMM_state14_TssBiv Gastric human	Gastric	NA	human	GI_STOMACH	PrimaryTissue	14_TssBiv_E094.bed	5.93795e-20	867
hyper	86	chromHMM_state14_TssBiv	9.55879	2.02742	108	94	80	96	96	90	646	59641	723264	chromHMM_state14_TssBiv HeLa-S3_Cervical_Carcinoma human	HeLa-S3_Cervical_Carcinoma	NA	human	CERVIX	CellLine	14_TssBiv_E117.bed	3.57829e-11	787
hyper	25	chromHMM_state14_TssBiv	6.39362	1.30635	411	95	97	90	97	94	3818	59338	720092	chromHMM_state14_TssBiv CD4+_CD25-_CD45RO+_Memory_Primary_Cells human	CD4+_CD25-_CD45RO+_Memory_Primary_Cells	NA	human	BLOOD	PrimaryCell	14_TssBiv_E040.bed	5.17904e-08	1780
hyper	92	chromHMM_state14_TssBiv	3.90554	1.32149	210	96	96	94	96	95.3	1927	59539	721983	chromHMM_state14_TssBiv K562_Leukemia human	K562_Leukemia	NA	human	BLOOD	PrimaryCulture	14_TssBiv_E123.bed	1.57682e-05	1442
hyper	69	chromHMM_state14_TssBiv	2.85585	2.18525	22	97	75	98	98	90	122	59727	723788	chromHMM_state14_TssBiv Pancreas human	Pancreas	NA	human	PANCREAS	PrimaryTissue	14_TssBiv_E098.bed	0.000174971	526
hyper	84	chromHMM_state14_TssBiv	1.26226e-12	0.729974	464	98	98	88	98	94.7	7679	59285	716231	chromHMM_state14_TssBiv Dnd41_TCell_Leukemia human	Dnd41_TCell_Leukemia	NA	human	BLOOD	CellLine	14_TssBiv_E115.bed	0.124269	1724
hyper	35	chromHMM_state15_EnhBiv	Inf	6.96572	7369	1	4	9	9	4.67	14331	52380	709579	chromHMM_state15_EnhBiv Mobilized_CD34_Primary_Cells_Female human	Mobilized_CD34_Primary_Cells_Female	NA	human	BLOOD	PrimaryCell	15_EnhBiv_E050.bed	NA	12688
hyper	40	chromHMM_state15_EnhBiv	Inf	6.55096	5536	1	8	15	15	8	11111	54213	712799	chromHMM_state15_EnhBiv Penis_Foreskin_Melanocyte_Primary_Cells_skin03 human	Penis_Foreskin_Melanocyte_Primary_Cells_skin03	NA	human	SKIN	PrimaryCulture	15_EnhBiv_E061.bed	NA	9411
hyper	28	chromHMM_state15_EnhBiv	Inf	5.6136	5957	1	20	14	20	11.7	14004	53792	709906	chromHMM_state15_EnhBiv CD4+_CD25-_Th_Primary_Cells human	CD4+_CD25-_Th_Primary_Cells	NA	human	BLOOD	PrimaryCell	15_EnhBiv_E043.bed	NA	8180
hyper	4	chromHMM_state15_EnhBiv	Inf	5.44303	6390	1	24	12	24	12.3	15584	53359	708326	chromHMM_state15_EnhBiv H1_Derived_Mesenchymal_Stem_Cells human	H1_Derived_Mesenchymal_Stem_Cells	NA	human	ESC_DERIVED	ESCDerived	15_EnhBiv_E006.bed	NA	13454
hyper	3	chromHMM_state15_EnhBiv	Inf	5.69495	4746	1	18	19	19	12.7	10804	55003	713106	chromHMM_state15_EnhBiv H1_BMP4_Derived_Trophoblast_Cultured_Cells human	H1_BMP4_Derived_Trophoblast_Cultured_Cells	NA	human	ESC_DERIVED	ESCDerived	15_EnhBiv_E005.bed	NA	7026
hyper	24	chromHMM_state15_EnhBiv	Inf	6.39663	3705	1	10	31	31	14	7405	56044	716505	chromHMM_state15_EnhBiv CD4+_CD25-_CD45RA+_Naive_Primary_Cells human	CD4+_CD25-_CD45RA+_Naive_Primary_Cells	NA	human	BLOOD	PrimaryCell	15_EnhBiv_E039.bed	NA	5982
hyper	26	chromHMM_state15_EnhBiv	Inf	5.24361	6339	1	30	13	30	14.7	16021	53410	707889	chromHMM_state15_EnhBiv CD4+_CD25-_IL17-_PMA-Ionomycin_stimulated_MACS_purified_	CD4+_CD25-_IL17-_PMA-Ionomycin_stimulated_MACS_purified_Th_Primary_Cells	NA	human	BLOOD	PrimaryCell	15_EnhBiv_E041.bed	NA	9171
hyper	44	chromHMM_state15_EnhBiv	Inf	5.53903	4351	1	23	22	23	15.3	10121	55398	713789	chromHMM_state15_EnhBiv Adult_Liver human	Adult_Liver	NA	human	LIVER	PrimaryTissue	15_EnhBiv_E066.bed	NA	4584
hyper	8	chromHMM_state15_EnhBiv	Inf	5.28951	4353	1	27	21	27	16.3	10596	55396	713314	chromHMM_state15_EnhBiv hESC_Derived_CD56+_Ectoderm_Cultured_Cells human	hESC_Derived_CD56+_Ectoderm_Cultured_Cells	NA	human	ESC_DERIVED	ESCDerived	15_EnhBiv_E012.bed	NA	12102
hyper	66	chromHMM_state15_EnhBiv	Inf	5.93748	3389	1	13	36	36	16.7	7257	56360	716653	chromHMM_state15_EnhBiv Left_Ventricle human	Left_Ventricle	NA	human	HEART	PrimaryTissue	15_EnhBiv_E095.bed	NA	5135
hyper	21	chromHMM_state15_EnhBiv	Inf	4.69177	10745	1	52	2	52	18.3	32321	49004	691589	chromHMM_state15_EnhBiv CD3_Primary_Cells_Peripheral_UW human	CD3_Primary_Cells_Peripheral_UW	NA	human	BLOOD	PrimaryCell	15_EnhBiv_E034.bed	NA	21745
hyper	16	chromHMM_state15_EnhBiv	Inf	6.66625	2528	1	7	48	48	18.7	4766	57221	719144	chromHMM_state15_EnhBiv iPS_DF_6.9_Cell_Line human	iPS_DF_6.9_Cell_Line	NA	human	IPSC	PrimaryCulture	15_EnhBiv_E021.bed	NA	6352
hyper	27	chromHMM_state15_EnhBiv	Inf	5.27286	4058	1	29	26	29	18.7	9867	55691	714043	chromHMM_state15_EnhBiv CD4+_CD25-_IL17+_PMA-Ionomcyin_stimulated_Th17_Primary_C	CD4+_CD25-_IL17+_PMA-Ionomcyin_stimulated_Th17_Primary_Cells	NA	human	BLOOD	PrimaryCell	15_EnhBiv_E042.bed	NA	6668
hyper	20	chromHMM_state15_EnhBiv	Inf	4.7015	8384	1	51	5	51	19	24289	51365	699621	chromHMM_state15_EnhBiv CD19_Primary_Cells_Peripheral_UW human	CD19_Primary_Cells_Peripheral_UW	NA	human	BLOOD	PrimaryCell	15_EnhBiv_E032.bed	NA	11482
hyper	64	chromHMM_state15_EnhBiv	Inf	4.78784	7022	1	46	10	46	19	19591	52727	704319	chromHMM_state15_EnhBiv Fetal_Thymus human	Fetal_Thymus	NA	human	THYMUS	PrimaryTissue	15_EnhBiv_E093.bed	NA	12130
hyper	70	chromHMM_state15_EnhBiv	Inf	5.05804	4930	1	39	17	39	19	12645	54819	711265	chromHMM_state15_EnhBiv Placenta_Amnion human	Placenta_Amnion	NA	human	PLACENTA	PrimaryTissue	15_EnhBiv_E099.bed	NA	5628
hyper	17	chromHMM_state15_EnhBiv	Inf	5.58614	3396	1	22	35	35	19.3	7726	56353	716184	chromHMM_state15_EnhBiv iPS_DF_19.11_Cell_Line human	iPS_DF_19.11_Cell_Line	NA	human	IPSC	PrimaryCulture	15_EnhBiv_E022.bed	NA	9131
hyper	58	chromHMM_state15_EnhBiv	Inf	5.15997	4287	1	34	23	34	19.3	10684	55462	713226	chromHMM_state15_EnhBiv Fetal_Intestine_Small human	Fetal_Intestine_Small	NA	human	GI_INTESTINE	PrimaryTissue	15_EnhBiv_E085.bed	NA	8887
hyper	67	chromHMM_state15_EnhBiv	Inf	5.66637	3233	1	19	38	38	19.3	7235	56516	716675	chromHMM_state15_EnhBiv Lung human	Lung	NA	human	LUNG	PrimaryTissue	15_EnhBiv_E096.bed	NA	3681
hyper	54	chromHMM_state15_EnhBiv	Inf	5.86105	2716	1	14	44	44	19.7	5834	57033	718076	chromHMM_state15_EnhBiv Duodenum_Smooth_Muscle human	Duodenum_Smooth_Muscle	NA	human	GI_DUODENUM	PrimaryTissue	15_EnhBiv_E078.bed	NA	6125
hyper	61	chromHMM_state15_EnhBiv	Inf	4.60341	9249	1	55	3	55	19.7	27699	50500	696211	chromHMM_state15_EnhBiv Fetal_Muscle_Leg human	Fetal_Muscle_Leg	NA	human	MUSCLE_LEG	PrimaryTissue	15_EnhBiv_E090.bed	NA	26187
hyper	57	chromHMM_state15_EnhBiv	Inf	5.07148	4127	1	38	25	38	21.3	10437	55622	713473	chromHMM_state15_EnhBiv Fetal_Intestine_Large human	Fetal_Intestine_Large	NA	human	GI_INTESTINE	PrimaryTissue	15_EnhBiv_E084.bed	NA	8904
hyper	38	chromHMM_state15_EnhBiv	Inf	5.18732	3646	1	33	32	33	22	8957	56103	714953	chromHMM_state15_EnhBiv Penis_Foreskin_Keratinocyte_Primary_Cells_skin03 human	Penis_Foreskin_Keratinocyte_Primary_Cells_skin03	NA	human	SKIN	PrimaryCulture	15_EnhBiv_E058.bed	NA	9558
hyper	9	chromHMM_state15_EnhBiv	Inf	7.26804	1815	1	3	63	63	22.3	3107	57934	720803	chromHMM_state15_EnhBiv hESC_Derived_CD56+_Mesoderm_Cultured_Cells human	hESC_Derived_CD56+_Mesoderm_Cultured_Cells	NA	human	ESC_DERIVED	ESCDerived	15_EnhBiv_E013.bed	NA	3173
hyper	56	chromHMM_state15_EnhBiv	Inf	4.39334	9172	1	63	4	63	22.7	28697	50577	695213	chromHMM_state15_EnhBiv Fetal_Adrenal_Gland human	Fetal_Adrenal_Gland	NA	human	ADRENAL	PrimaryTissue	15_EnhBiv_E080.bed	NA	26479
hyper	82	chromHMM_state15_EnhBiv	Inf	4.88904	4217	1	43	24	43	22.7	11072	55532	712838	chromHMM_state15_EnhBiv Spleen human	Spleen	NA	human	SPLEEN	PrimaryTissue	15_EnhBiv_E113.bed	NA	3549
hyper	5	chromHMM_state15_EnhBiv	Inf	6.71766	1839	1	6	62	62	23	3406	57910	720504	chromHMM_state15_EnhBiv H1_Derived_Neuronal_Progenitor_Cultured_Cells human	H1_Derived_Neuronal_Progenitor_Cultured_Cells	NA	human	ESC_DERIVED	ESCDerived	15_EnhBiv_E007.bed	NA	3165
hyper	7	chromHMM_state15_EnhBiv	Inf	5.37487	2763	1	25	43	43	23	6471	56986	717439	chromHMM_state15_EnhBiv hESC_Derived_CD184+_Endoderm_Cultured_Cells human	hESC_Derived_CD184+_Endoderm_Cultured_Cells	NA	human	ESC_DERIVED	ESCDerived	15_EnhBiv_E011.bed	NA	10022
hyper	31	chromHMM_state15_EnhBiv	Inf	4.50831	7579	1	60	8	60	23	22599	52170	701311	chromHMM_state15_EnhBiv CD56_Primary_Cells human	CD56_Primary_Cells	NA	human	BLOOD	PrimaryCell	15_EnhBiv_E046.bed	NA	10682
hyper	1	chromHMM_state15_EnhBiv	Inf	4.74979	4520	1	49	20	49	23.3	12262	55229	711648	chromHMM_state15_EnhBiv H1_Cell_Line human	H1_Cell_Line	NA	human	ESC	PrimaryCulture	15_EnhBiv_E003.bed	NA	14875
hyper	55	chromHMM_state15_EnhBiv	Inf	5.27772	2998	1	28	41	41	23.3	7174	56751	716736	chromHMM_state15_EnhBiv Esophagus human	Esophagus	NA	human	GI_ESOPHAGUS	PrimaryTissue	15_EnhBiv_E079.bed	NA	4580
hyper	48	chromHMM_state15_EnhBiv	Inf	5.60749	2437	1	21	50	50	24	5448	57312	718462	chromHMM_state15_EnhBiv Brain_Hippocampus_Middle human	Brain_Hippocampus_Middle	NA	human	BRAIN	PrimaryTissue	15_EnhBiv_E071.bed	NA	5931
hyper	63	chromHMM_state15_EnhBiv	Inf	4.26876	7955	1	69	6	69	25.3	25142	51794	698768	chromHMM_state15_EnhBiv Fetal_Stomach human	Fetal_Stomach	NA	human	GI_STOMACH	PrimaryTissue	15_EnhBiv_E092.bed	NA	23168
hyper	42	chromHMM_state15_EnhBiv	Inf	4.75638	3920	1	48	29	48	26	10531	55829	713379	chromHMM_state15_EnhBiv Adipose_Nuclei human	Adipose_Nuclei	NA	human	FAT	PrimaryTissue	15_EnhBiv_E063.bed	NA	10287
hyper	60	chromHMM_state15_EnhBiv	Inf	3.76925	12439	1	77	1	77	26.3	47207	47310	676703	chromHMM_state15_EnhBiv Fetal_Muscle_Trunk human	Fetal_Muscle_Trunk	NA	human	MUSCLE	PrimaryTissue	15_EnhBiv_E089.bed	NA	42341
hyper	30	chromHMM_state15_EnhBiv	Inf	5.13912	2978	1	37	42	42	26.7	7314	56771	716596	chromHMM_state15_EnhBiv CD4+_CD25int_CD127+_Tmem_Primary_Cells human	CD4+_CD25int_CD127+_Tmem_Primary_Cells	NA	human	BLOOD	PrimaryCell	15_EnhBiv_E045.bed	NA	4657
hyper	39	chromHMM_state15_EnhBiv	Inf	4.44358	4842	1	61	18	61	26.7	14087	54907	709823	chromHMM_state15_EnhBiv Penis_Foreskin_Melanocyte_Primary_Cells_skin01 human	Penis_Foreskin_Melanocyte_Primary_Cells_skin01	NA	human	SKIN	PrimaryCulture	15_EnhBiv_E059.bed	NA	17388
hyper	62	chromHMM_state15_EnhBiv	Inf	4.06191	7801	1	73	7	73	27	25810	51948	698100	chromHMM_state15_EnhBiv Fetal_Placenta human	Fetal_Placenta	NA	human	PLACENTA	PrimaryTissue	15_EnhBiv_E091.bed	NA	16301
hyper	29	chromHMM_state15_EnhBiv	Inf	4.79463	3242	1	45	37	45	27.7	8560	56507	715350	chromHMM_state15_EnhBiv CD4+_CD25+_CD127-_Treg_Primary_Cells human	CD4+_CD25+_CD127-_Treg_Primary_Cells	NA	human	BLOOD	PrimaryCell	15_EnhBiv_E044.bed	NA	7244
hyper	53	chromHMM_state15_EnhBiv	Inf	5.71447	1705	1	17	66	66	28	3702	58044	720208	chromHMM_state15_EnhBiv Colon_Smooth_Muscle human	Colon_Smooth_Muscle	NA	human	GI_COLON	PrimaryTissue	15_EnhBiv_E076.bed	NA	3533
hyper	76	chromHMM_state15_EnhBiv	Inf	6.20258	1261	1	11	72	72	28	2508	58488	721402	chromHMM_state15_EnhBiv Right_Ventricle human	Right_Ventricle	NA	human	HEART	PrimaryTissue	15_EnhBiv_E105.bed	NA	3171
hyper	19	chromHMM_state15_EnhBiv	Inf	4.05019	6609	1	74	11	74	28.7	21568	53140	702342	chromHMM_state15_EnhBiv CD14_Primary_Cells human	CD14_Primary_Cells	NA	human	BLOOD	PrimaryCell	15_EnhBiv_E029.bed	NA	12525
hyper	32	chromHMM_state15_EnhBiv	Inf	4.59203	3939	1	57	28	57	28.7	10958	55810	712952	chromHMM_state15_EnhBiv CD8_Naive_Primary_Cells human	CD8_Naive_Primary_Cells	NA	human	BLOOD	PrimaryCell	15_EnhBiv_E047.bed	NA	5608
hyper	71	chromHMM_state15_EnhBiv	Inf	6.51149	1077	1	9	79	79	29.7	2035	58672	721875	chromHMM_state15_EnhBiv Psoas_Muscle human	Psoas_Muscle	NA	human	MUSCLE	PrimaryTissue	15_EnhBiv_E100.bed	NA	2181
hyper	23	chromHMM_state15_EnhBiv	Inf	4.93445	2623	1	42	47	47	30	6674	57126	717236	chromHMM_state15_EnhBiv CD4_Naive_Primary_Cells human	CD4_Naive_Primary_Cells	NA	human	BLOOD	PrimaryCell	15_EnhBiv_E038.bed	NA	3964
hyper	46	chromHMM_state15_EnhBiv	Inf	5.94566	1078	1	12	78	78	30.3	2230	58671	721680	chromHMM_state15_EnhBiv Brain_Anterior_Caudate human	Brain_Anterior_Caudate	NA	human	BRAIN	PrimaryTissue	15_EnhBiv_E068.bed	NA	2564
hyper	2	chromHMM_state15_EnhBiv	Inf	5.82563	1188	1	16	75	75	30.7	2512	58561	721398	chromHMM_state15_EnhBiv H1_BMP4_Derived_Mesendoderm_Cultured_Cells human	H1_BMP4_Derived_Mesendoderm_Cultured_Cells	NA	human	ESC_DERIVED	ESCDerived	15_EnhBiv_E004.bed	NA	3945
hyper	68	chromHMM_state15_EnhBiv	Inf	5.84833	1107	1	15	77	77	31	2329	58642	721581	chromHMM_state15_EnhBiv Ovary human	Ovary	NA	human	OVARY	PrimaryTissue	15_EnhBiv_E097.bed	NA	1960
hyper	22	chromHMM_state15_EnhBiv	Inf	4.72283	2685	1	50	45	50	32	7141	57064	716769	chromHMM_state15_EnhBiv CD4_Memory_Primary_Cells human	CD4_Memory_Primary_Cells	NA	human	BLOOD	PrimaryCell	15_EnhBiv_E037.bed	NA	3822
hyper	25	chromHMM_state15_EnhBiv	Inf	3.7617	5070	1	79	16	79	32	17413	54679	706497	chromHMM_state15_EnhBiv CD4+_CD25-_CD45RO+_Memory_Primary_Cells human	CD4+_CD25-_CD45RO+_Memory_Primary_Cells	NA	human	BLOOD	PrimaryCell	15_EnhBiv_E040.bed	NA	6210
hyper	52	chromHMM_state15_EnhBiv	Inf	4.85202	2062	1	44	56	56	33.7	5294	57687	718616	chromHMM_state15_EnhBiv Colonic_Mucosa human	Colonic_Mucosa	NA	human	GI_COLON	PrimaryTissue	15_EnhBiv_E075.bed	NA	5451
hyper	51	chromHMM_state15_EnhBiv	Inf	5.21028	1433	1	31	70	70	34	3398	58316	720512	chromHMM_state15_EnhBiv Brain_Substantia_Nigra human	Brain_Substantia_Nigra	NA	human	BRAIN	PrimaryTissue	15_EnhBiv_E074.bed	NA	3165
hyper	10	chromHMM_state15_EnhBiv	Inf	4.66448	2444	1	53	49	53	34.3	6559	57305	717351	chromHMM_state15_EnhBiv HUES48_Cell_Line human	HUES48_Cell_Line	NA	human	ESC	PrimaryCulture	15_EnhBiv_E014.bed	NA	12324
hyper	47	chromHMM_state15_EnhBiv	Inf	5.15427	1699	1	35	67	67	34.3	4087	58050	719823	chromHMM_state15_EnhBiv Brain_Cingulate_Gyrus human	Brain_Cingulate_Gyrus	NA	human	BRAIN	PrimaryTissue	15_EnhBiv_E069.bed	NA	4739
hyper	80	chromHMM_state15_EnhBiv	Inf	4.52645	2651	1	58	46	58	35	7350	57098	716560	chromHMM_state15_EnhBiv Stomach_Smooth_Muscle human	Stomach_Smooth_Muscle	NA	human	GI_STOMACH	PrimaryTissue	15_EnhBiv_E111.bed	NA	11212
hyper	78	chromHMM_state15_EnhBiv	Inf	4.1019	3449	1	72	34	72	35.7	10653	56300	713257	chromHMM_state15_EnhBiv Skeletal_Muscle_Female human	Skeletal_Muscle_Female	NA	human	MUSCLE	PrimaryTissue	15_EnhBiv_E108.bed	NA	11095
hyper	49	chromHMM_state15_EnhBiv	Inf	5.14074	1363	1	36	71	71	36	3272	58386	720638	chromHMM_state15_EnhBiv Brain_Inferior_Temporal_Lobe human	Brain_Inferior_Temporal_Lobe	NA	human	BRAIN	PrimaryTissue	15_EnhBiv_E072.bed	NA	3609
hyper	77	chromHMM_state15_EnhBiv	Inf	4.02519	3564	1	75	33	75	36.3	11232	56185	712678	chromHMM_state15_EnhBiv Sigmoid_Colon human	Sigmoid_Colon	NA	human	GI_COLON	PrimaryTissue	15_EnhBiv_E106.bed	NA	6230
hyper	36	chromHMM_state15_EnhBiv	Inf	3.57573	4043	1	82	27	82	36.7	14401	55706	709509	chromHMM_state15_EnhBiv Penis_Foreskin_Fibroblast_Primary_Cells_skin01 human	Penis_Foreskin_Fibroblast_Primary_Cells_skin01	NA	human	SKIN	PrimaryCulture	15_EnhBiv_E055.bed	NA	22318
hyper	93	chromHMM_state15_EnhBiv	Inf	4.22884	3205	1	70	39	70	36.7	9575	56544	714335	chromHMM_state15_EnhBiv Monocytes-CD14+_RO01746 human	Monocytes-CD14+_RO01746	NA	human	BLOOD	PrimaryCell	15_EnhBiv_E124.bed	NA	10477
hyper	33	chromHMM_state15_EnhBiv	Inf	4.51149	2325	1	59	52	59	37.3	6439	57424	717471	chromHMM_state15_EnhBiv CD8_Memory_Primary_Cells human	CD8_Memory_Primary_Cells	NA	human	BLOOD	PrimaryCell	15_EnhBiv_E048.bed	NA	4211
hyper	94	chromHMM_state15_EnhBiv	Inf	4.63521	2007	1	54	59	59	38	5388	57742	718522	chromHMM_state15_EnhBiv NH-A_Astrocytes human	NH-A_Astrocytes	NA	human	BRAIN	PrimaryCulture	15_EnhBiv_E125.bed	NA	5325
hyper	37	chromHMM_state15_EnhBiv	Inf	3.52886	3887	1	84	30	84	38.3	13998	55862	709912	chromHMM_state15_EnhBiv Penis_Foreskin_Fibroblast_Primary_Cells_skin02 human	Penis_Foreskin_Fibroblast_Primary_Cells_skin02	NA	human	SKIN	PrimaryCulture	15_EnhBiv_E056.bed	NA	23296
hyper	91	chromHMM_state15_EnhBiv	Inf	4.4093	2066	1	62	55	62	39.3	5833	57683	718077	chromHMM_state15_EnhBiv HUVEC_Umbilical_Vein_Endothelial_Cells human	HUVEC_Umbilical_Vein_Endothelial_Cells	NA	human	VASCULAR	PrimaryCulture	15_EnhBiv_E122.bed	NA	5421
hyper	79	chromHMM_state15_EnhBiv	Inf	4.31626	2087	1	65	54	65	40	6020	57662	717890	chromHMM_state15_EnhBiv Small_Intestine human	Small_Intestine	NA	human	GI_INTESTINE	PrimaryTissue	15_EnhBiv_E109.bed	NA	4371
hyper	13	chromHMM_state15_EnhBiv	Inf	3.64276	3087	1	80	40	80	40.3	10667	56662	713243	chromHMM_state15_EnhBiv IMR90_Cell_Line human	IMR90_Cell_Line	NA	human	LUNG	CellLine	15_EnhBiv_E017.bed	NA	14468
hyper	50	chromHMM_state15_EnhBiv	Inf	4.78391	1258	1	47	73	73	40.3	3240	58491	720670	chromHMM_state15_EnhBiv Brain_Mid_Frontal_Lobe human	Brain_Mid_Frontal_Lobe	NA	human	BRAIN	PrimaryTissue	15_EnhBiv_E073.bed	NA	3624
hyper	41	chromHMM_state15_EnhBiv	Inf	4.3025	2022	1	66	58	66	41.7	5846	57727	718064	chromHMM_state15_EnhBiv Peripheral_Blood_Mononuclear_Primary_Cells human	Peripheral_Blood_Mononuclear_Primary_Cells	NA	human	BLOOD	PrimaryCell	15_EnhBiv_E062.bed	NA	5915
hyper	81	chromHMM_state15_EnhBiv	Inf	4.60255	1624	1	56	68	68	41.7	4368	58125	719542	chromHMM_state15_EnhBiv Thymus human	Thymus	NA	human	THYMUS	PrimaryTissue	15_EnhBiv_E112.bed	NA	5211
hyper	14	chromHMM_state15_EnhBiv	Inf	3.80748	2388	1	76	51	76	42.7	7829	57361	716081	chromHMM_state15_EnhBiv iPS-18_Cell_Line human	iPS-18_Cell_Line	NA	human	IPSC	PrimaryCulture	15_EnhBiv_E019.bed	NA	14403
hyper	12	chromHMM_state15_EnhBiv	Inf	4.2951	1986	1	67	61	67	43	5749	57763	718161	chromHMM_state15_EnhBiv HUES64_Cell_Line human	HUES64_Cell_Line	NA	human	ESC	PrimaryCulture	15_EnhBiv_E016.bed	NA	11016
hyper	72	chromHMM_state15_EnhBiv	Inf	4.33752	1764	1	64	64	64	43	5042	57985	718868	chromHMM_state15_EnhBiv Rectal_Mucosa.Donor_29 human	Rectal_Mucosa.Donor_29	NA	human	GI_RECTUM	PrimaryTissue	15_EnhBiv_E101.bed	NA	4931
hyper	88	chromHMM_state15_EnhBiv	Inf	4.15686	2004	1	71	60	71	44	5994	57745	717916	chromHMM_state15_EnhBiv HMEC_Mammary_Epithelial human	HMEC_Mammary_Epithelial	NA	human	BREAST	PrimaryCulture	15_EnhBiv_E119.bed	NA	4205
hyper	73	chromHMM_state15_EnhBiv	Inf	4.27692	1533	1	68	69	69	46	4430	58216	719480	chromHMM_state15_EnhBiv Rectal_Mucosa.Donor_31 human	Rectal_Mucosa.Donor_31	NA	human	GI_RECTUM	PrimaryTissue	15_EnhBiv_E102.bed	NA	4560
hyper	11	chromHMM_state15_EnhBiv	Inf	3.54027	2032	1	83	57	83	47	7128	57717	716782	chromHMM_state15_EnhBiv HUES6_Cell_Line human	HUES6_Cell_Line	NA	human	ESC	PrimaryCulture	15_EnhBiv_E015.bed	NA	13668
hyper	15	chromHMM_state15_EnhBiv	Inf	3.76225	1744	1	78	65	78	48	5739	58005	718171	chromHMM_state15_EnhBiv iPS-20b_Cell_Line human	iPS-20b_Cell_Line	NA	human	IPSC	PrimaryCulture	15_EnhBiv_E020.bed	NA	12206
hyper	45	chromHMM_state15_EnhBiv	269.756	5.01318	886	77	40	81	81	66	2167	58863	721743	chromHMM_state15_EnhBiv Brain_Angular_Gyrus human	Brain_Angular_Gyrus	NA	human	BRAIN	PrimaryTissue	15_EnhBiv_E067.bed	NA	2310
hyper	6	chromHMM_state15_EnhBiv	230.298	5.2102	729	78	32	82	82	64	1712	59020	722198	chromHMM_state15_EnhBiv H9_Cell_Line human	H9_Cell_Line	NA	human	ESC	PrimaryCulture	15_EnhBiv_E008.bed	NA	3680
hyper	96	chromHMM_state15_EnhBiv	218.241	3.17743	1207	79	87	74	87	80	4667	58542	719243	chromHMM_state15_EnhBiv NHEK-Epidermal_Keratinocytes human	NHEK-Epidermal_Keratinocytes	NA	human	SKIN	PrimaryCulture	15_EnhBiv_E127.bed	NA	5716
hyper	87	chromHMM_state15_EnhBiv	217.474	2.25142	2206	80	96	53	96	76.3	12120	57543	711790	chromHMM_state15_EnhBiv HepG2_Hepatocellular_Carcinoma human	HepG2_Hepatocellular_Carcinoma	NA	human	LIVER	CellLine	15_EnhBiv_E118.bed	NA	21840
hyper	85	chromHMM_state15_EnhBiv	216.035	3.29182	1137	81	85	76	85	80.7	4241	58612	719669	chromHMM_state15_EnhBiv GM12878_Lymphoblastoid human	GM12878_Lymphoblastoid	NA	human	BLOOD	PrimaryCulture	15_EnhBiv_E116.bed	NA	4014
hyper	97	chromHMM_state15_EnhBiv	148.5	3.63583	683	82	81	84	84	82.3	2295	59066	721615	chromHMM_state15_EnhBiv NHLF_Lung_Fibroblasts human	NHLF_Lung_Fibroblasts	NA	human	LUNG	PrimaryCulture	15_EnhBiv_E128.bed	NA	2821
hyper	34	chromHMM_state15_EnhBiv	148.409	2.8802	945	83	91	80	91	84.7	4017	58804	719893	chromHMM_state15_EnhBiv Chondrocytes_from_Bone_Marrow_Derived_Mesenchymal_Stem_C	Chondrocytes_from_Bone_Marrow_Derived_Mesenchymal_Stem_Cell_Cultured_Cells	NA	human	STROMAL_CONNECTIVE	PrimaryCulture	15_EnhBiv_E049.bed	NA	6273
hyper	95	chromHMM_state15_EnhBiv	134.723	3.24797	717	84	86	83	86	84.3	2697	59032	721213	chromHMM_state15_EnhBiv NHDF-Ad_Adult_Dermal_Fibroblasts human	NHDF-Ad_Adult_Dermal_Fibroblasts	NA	human	SKIN	PrimaryCulture	15_EnhBiv_E126.bed	NA	4047
hyper	74	chromHMM_state15_EnhBiv	125.017	4.97497	410	85	41	90	90	72	1004	59339	722906	chromHMM_state15_EnhBiv Rectal_Smooth_Muscle human	Rectal_Smooth_Muscle	NA	human	GI_RECTUM	PrimaryTissue	15_EnhBiv_E103.bed	NA	1495
hyper	98	chromHMM_state15_EnhBiv	117.463	3.07269	675	86	89	85	89	86.7	2682	59074	721228	chromHMM_state15_EnhBiv Osteoblasts human	Osteoblasts	NA	human	BONE	PrimaryCulture	15_EnhBiv_E129.bed	NA	4795
hyper	65	chromHMM_state15_EnhBiv	74.0029	8.37226	162	87	2	93	93	60.7	235	59587	723675	chromHMM_state15_EnhBiv Gastric human	Gastric	NA	human	GI_STOMACH	PrimaryTissue	15_EnhBiv_E094.bed	NA	318
hyper	18	chromHMM_state15_EnhBiv	63.8147	2.74065	433	88	92	86	92	88.7	1923	59316	721987	chromHMM_state15_EnhBiv Bone_Marrow_Derived_Mesenchymal_Stem_Cell_Cultured_Cells	Bone_Marrow_Derived_Mesenchymal_Stem_Cell_Cultured_Cells	NA	human	STROMAL_CONNECTIVE	PrimaryCulture	15_EnhBiv_E026.bed	NA	2659
hyper	89	chromHMM_state15_EnhBiv	61.9124	3.1499	339	89	88	92	92	89.7	1309	59410	722601	chromHMM_state15_EnhBiv HSMM_Skeletal_Muscle_Myoblasts human	HSMM_Skeletal_Muscle_Myoblasts	NA	human	MUSCLE	PrimaryCulture	15_EnhBiv_E120.bed	NA	1913
hyper	83	chromHMM_state15_EnhBiv	59.4151	2.97165	354	90	90	91	91	90.3	1449	59395	722461	chromHMM_state15_EnhBiv A549_EtOH_0.02pct_Lung_Carcinoma human	A549_EtOH_0.02pct_Lung_Carcinoma	NA	human	LUNG	CellLine	15_EnhBiv_E114.bed	NA	2250
hyper	90	chromHMM_state15_EnhBiv	53.837	2.544	414	91	93	89	93	91	1980	59335	721930	chromHMM_state15_EnhBiv HSMMtube_Skeletal_Muscle_Myotubes_Derived_from_HSMM huma	HSMMtube_Skeletal_Muscle_Myotubes_Derived_from_HSMM	NA	human	MUSCLE	PrimaryCulture	15_EnhBiv_E121.bed	NA	3869
hyper	43	chromHMM_state15_EnhBiv	49.5312	5.29839	151	92	26	94	94	70.7	346	59598	723564	chromHMM_state15_EnhBiv Aorta human	Aorta	NA	human	VASCULAR	PrimaryTissue	15_EnhBiv_E065.bed	NA	634
hyper	92	chromHMM_state15_EnhBiv	46.2444	2.3068	428	93	95	88	95	92	2257	59321	721653	chromHMM_state15_EnhBiv K562_Leukemia human	K562_Leukemia	NA	human	BLOOD	PrimaryCulture	15_EnhBiv_E123.bed	NA	4088
hyper	75	chromHMM_state15_EnhBiv	40.9774	6.88464	101	94	5	95	95	64.7	178	59648	723732	chromHMM_state15_EnhBiv Right_Atrium human	Right_Atrium	NA	human	HEART	PrimaryTissue	15_EnhBiv_E104.bed	NA	343
hyper	84	chromHMM_state15_EnhBiv	34.3742	2.01112	431	95	97	87	97	93	2606	59318	721304	chromHMM_state15_EnhBiv Dnd41_TCell_Leukemia human	Dnd41_TCell_Leukemia	NA	human	BLOOD	CellLine	15_EnhBiv_E115.bed	NA	2889
hyper	69	chromHMM_state15_EnhBiv	31.5305	8.95807	65	96	1	96	96	64.3	88	59684	723822	chromHMM_state15_EnhBiv Pancreas human	Pancreas	NA	human	PANCREAS	PrimaryTissue	15_EnhBiv_E098.bed	NA	278
hyper	59	chromHMM_state15_EnhBiv	4.27228	2.39198	30	97	94	98	98	96.3	152	59719	723758	chromHMM_state15_EnhBiv Pancreatic_Islets human	Pancreatic_Islets	NA	human	PANCREAS	PrimaryTissue	15_EnhBiv_E087.bed	NA	350
hyper	86	chromHMM_state15_EnhBiv	3.33114	1.75814	47	98	98	97	98	97.7	324	59702	723586	chromHMM_state15_EnhBiv HeLa-S3_Cervical_Carcinoma human	HeLa-S3_Cervical_Carcinoma	NA	human	CERVIX	CellLine	15_EnhBiv_E117.bed	NA	825
hyper	41	chromHMM_state16_ReprPC	Inf	6.76689	15246	1	10	4	10	5	34883	44503	689027	chromHMM_state16_ReprPC Peripheral_Blood_Mononuclear_Primary_Cells human	Peripheral_Blood_Mononuclear_Primary_Cells	NA	human	BLOOD	PrimaryCell	16_ReprPC_E062.bed	NA	16587
hyper	81	chromHMM_state16_ReprPC	Inf	6.28553	14791	1	19	5	19	8.33	36006	44958	687904	chromHMM_state16_ReprPC Thymus human	Thymus	NA	human	THYMUS	PrimaryTissue	16_ReprPC_E112.bed	NA	15017
hyper	29	chromHMM_state16_ReprPC	Inf	5.85307	12911	1	33	11	33	15	32561	46838	691349	chromHMM_state16_ReprPC CD4+_CD25+_CD127-_Treg_Primary_Cells human	CD4+_CD25+_CD127-_Treg_Primary_Cells	NA	human	BLOOD	PrimaryCell	16_ReprPC_E044.bed	NA	17369
hyper	77	chromHMM_state16_ReprPC	Inf	6.44085	9246	1	14	31	31	15.3	20008	50503	703902	chromHMM_state16_ReprPC Sigmoid_Colon human	Sigmoid_Colon	NA	human	GI_COLON	PrimaryTissue	16_ReprPC_E106.bed	NA	11209
hyper	79	chromHMM_state16_ReprPC	Inf	5.86455	12174	1	32	16	32	16.3	30268	47575	693642	chromHMM_state16_ReprPC Small_Intestine human	Small_Intestine	NA	human	GI_INTESTINE	PrimaryTissue	16_ReprPC_E109.bed	NA	14508
hyper	64	chromHMM_state16_ReprPC	Inf	5.32557	13716	1	43	7	43	17	38355	46033	685555	chromHMM_state16_ReprPC Fetal_Thymus human	Fetal_Thymus	NA	human	THYMUS	PrimaryTissue	16_ReprPC_E093.bed	NA	17529
hyper	19	chromHMM_state16_ReprPC	Inf	4.83825	16038	1	52	2	52	18.3	51028	43711	672882	chromHMM_state16_ReprPC CD14_Primary_Cells human	CD14_Primary_Cells	NA	human	BLOOD	PrimaryCell	16_ReprPC_E029.bed	NA	22921
hyper	93	chromHMM_state16_ReprPC	Inf	4.74448	16844	1	55	1	55	19	55323	42905	668587	chromHMM_state16_ReprPC Monocytes-CD14+_RO01746 human	Monocytes-CD14+_RO01746	NA	human	BLOOD	PrimaryCell	16_ReprPC_E124.bed	NA	28264
hyper	88	chromHMM_state16_ReprPC	Inf	6.67289	7826	1	12	45	45	19.3	15990	51923	707920	chromHMM_state16_ReprPC HMEC_Mammary_Epithelial human	HMEC_Mammary_Epithelial	NA	human	BREAST	PrimaryCulture	16_ReprPC_E119.bed	NA	9753
hyper	91	chromHMM_state16_ReprPC	Inf	4.9245	13242	1	51	8	51	20	39568	46507	684342	chromHMM_state16_ReprPC HUVEC_Umbilical_Vein_Endothelial_Cells human	HUVEC_Umbilical_Vein_Endothelial_Cells	NA	human	VASCULAR	PrimaryCulture	16_ReprPC_E122.bed	NA	29794
hyper	74	chromHMM_state16_ReprPC	Inf	6.71122	7411	1	11	51	51	21	14958	52338	708952	chromHMM_state16_ReprPC Rectal_Smooth_Muscle human	Rectal_Smooth_Muscle	NA	human	GI_RECTUM	PrimaryTissue	16_ReprPC_E103.bed	NA	7129
hyper	97	chromHMM_state16_ReprPC	Inf	5.01431	12331	1	48	14	48	21	35691	47418	688219	chromHMM_state16_ReprPC NHLF_Lung_Fibroblasts human	NHLF_Lung_Fibroblasts	NA	human	LUNG	PrimaryCulture	16_ReprPC_E128.bed	NA	19511
hyper	72	chromHMM_state16_ReprPC	Inf	6.0457	8550	1	25	38	38	21.3	19459	51199	704451	chromHMM_state16_ReprPC Rectal_Mucosa.Donor_29 human	Rectal_Mucosa.Donor_29	NA	human	GI_RECTUM	PrimaryTissue	16_ReprPC_E101.bed	NA	11936
hyper	32	chromHMM_state16_ReprPC	Inf	6.08374	7870	1	22	44	44	22.3	17612	51879	706298	chromHMM_state16_ReprPC CD8_Naive_Primary_Cells human	CD8_Naive_Primary_Cells	NA	human	BLOOD	PrimaryCell	16_ReprPC_E047.bed	NA	9476
hyper	53	chromHMM_state16_ReprPC	Inf	6.0228	8444	1	27	39	39	22.3	19257	51305	704653	chromHMM_state16_ReprPC Colon_Smooth_Muscle human	Colon_Smooth_Muscle	NA	human	GI_COLON	PrimaryTissue	16_ReprPC_E076.bed	NA	8152
hyper	73	chromHMM_state16_ReprPC	Inf	5.98846	8793	1	29	37	37	22.3	20277	50956	703633	chromHMM_state16_ReprPC Rectal_Mucosa.Donor_31 human	Rectal_Mucosa.Donor_31	NA	human	GI_RECTUM	PrimaryTissue	16_ReprPC_E102.bed	NA	10588
hyper	31	chromHMM_state16_ReprPC	Inf	5.73337	9219	1	36	32	36	23	22323	50530	701587	chromHMM_state16_ReprPC CD56_Primary_Cells human	CD56_Primary_Cells	NA	human	BLOOD	PrimaryCell	16_ReprPC_E046.bed	NA	16251
hyper	27	chromHMM_state16_ReprPC	Inf	5.82526	8910	1	35	34	35	23.3	21140	50839	702770	chromHMM_state16_ReprPC CD4+_CD25-_IL17+_PMA-Ionomcyin_stimulated_Th17_Primary_C	CD4+_CD25-_IL17+_PMA-Ionomcyin_stimulated_Th17_Primary_Cells	NA	human	BLOOD	PrimaryCell	16_ReprPC_E042.bed	NA	12231
hyper	2	chromHMM_state16_ReprPC	Inf	5.04007	10491	1	47	23	47	23.7	29350	49258	694560	chromHMM_state16_ReprPC H1_BMP4_Derived_Mesendoderm_Cultured_Cells human	H1_BMP4_Derived_Mesendoderm_Cultured_Cells	NA	human	ESC_DERIVED	ESCDerived	16_ReprPC_E004.bed	NA	10600
hyper	25	chromHMM_state16_ReprPC	Inf	6.3626	7238	1	17	54	54	24	15350	52511	708560	chromHMM_state16_ReprPC CD4+_CD25-_CD45RO+_Memory_Primary_Cells human	CD4+_CD25-_CD45RO+_Memory_Primary_Cells	NA	human	BLOOD	PrimaryCell	16_ReprPC_E040.bed	NA	10202
hyper	45	chromHMM_state16_ReprPC	Inf	6.60266	6841	1	13	59	59	24.3	13904	52908	710006	chromHMM_state16_ReprPC Brain_Angular_Gyrus human	Brain_Angular_Gyrus	NA	human	BRAIN	PrimaryTissue	16_ReprPC_E067.bed	NA	6836
hyper	96	chromHMM_state16_ReprPC	Inf	4.42133	12876	1	60	12	60	24.3	42346	46873	681564	chromHMM_state16_ReprPC NHEK-Epidermal_Keratinocytes human	NHEK-Epidermal_Keratinocytes	NA	human	SKIN	PrimaryCulture	16_ReprPC_E127.bed	NA	23846
hyper	98	chromHMM_state16_ReprPC	Inf	4.09001	12940	1	62	10	62	24.3	45832	46809	678078	chromHMM_state16_ReprPC Osteoblasts human	Osteoblasts	NA	human	BONE	PrimaryCulture	16_ReprPC_E129.bed	NA	31868
hyper	55	chromHMM_state16_ReprPC	Inf	7.68361	5475	1	2	71	71	24.7	9381	54274	714529	chromHMM_state16_ReprPC Esophagus human	Esophagus	NA	human	GI_ESOPHAGUS	PrimaryTissue	16_ReprPC_E079.bed	NA	5864
hyper	18	chromHMM_state16_ReprPC	Inf	3.8956	13184	1	65	9	65	25	49051	46565	674859	chromHMM_state16_ReprPC Bone_Marrow_Derived_Mesenchymal_Stem_Cell_Cultured_Cells	Bone_Marrow_Derived_Mesenchymal_Stem_Cell_Cultured_Cells	NA	human	STROMAL_CONNECTIVE	PrimaryCulture	16_ReprPC_E026.bed	NA	30813
hyper	26	chromHMM_state16_ReprPC	Inf	4.98504	10106	1	49	25	49	25	28402	49643	695508	chromHMM_state16_ReprPC CD4+_CD25-_IL17-_PMA-Ionomycin_stimulated_MACS_purified_	CD4+_CD25-_IL17-_PMA-Ionomycin_stimulated_MACS_purified_Th_Primary_Cells	NA	human	BLOOD	PrimaryCell	16_ReprPC_E041.bed	NA	17688
hyper	30	chromHMM_state16_ReprPC	Inf	7.11378	6364	1	6	68	68	25	11931	53385	711979	chromHMM_state16_ReprPC CD4+_CD25int_CD127+_Tmem_Primary_Cells human	CD4+_CD25int_CD127+_Tmem_Primary_Cells	NA	human	BLOOD	PrimaryCell	16_ReprPC_E045.bed	NA	6793
hyper	70	chromHMM_state16_ReprPC	Inf	5.83642	8059	1	34	42	42	25.7	18832	51690	705078	chromHMM_state16_ReprPC Placenta_Amnion human	Placenta_Amnion	NA	human	PLACENTA	PrimaryTissue	16_ReprPC_E099.bed	NA	8600
hyper	94	chromHMM_state16_ReprPC	Inf	4.76239	10677	1	54	22	54	25.7	31628	49072	692282	chromHMM_state16_ReprPC NH-A_Astrocytes human	NH-A_Astrocytes	NA	human	BRAIN	PrimaryCulture	16_ReprPC_E125.bed	NA	19890
hyper	5	chromHMM_state16_ReprPC	Inf	7.4242	5340	1	4	73	73	26	9445	54409	714465	chromHMM_state16_ReprPC H1_Derived_Neuronal_Progenitor_Cultured_Cells human	H1_Derived_Neuronal_Progenitor_Cultured_Cells	NA	human	ESC_DERIVED	ESCDerived	16_ReprPC_E007.bed	NA	4046
hyper	28	chromHMM_state16_ReprPC	Inf	5.34384	8872	1	42	35	42	26	22876	50877	701034	chromHMM_state16_ReprPC CD4+_CD25-_Th_Primary_Cells human	CD4+_CD25-_Th_Primary_Cells	NA	human	BLOOD	PrimaryCell	16_ReprPC_E043.bed	NA	14855
hyper	3	chromHMM_state16_ReprPC	Inf	6.1433	7017	1	21	57	57	26.3	15348	52732	708562	chromHMM_state16_ReprPC H1_BMP4_Derived_Trophoblast_Cultured_Cells human	H1_BMP4_Derived_Trophoblast_Cultured_Cells	NA	human	ESC_DERIVED	ESCDerived	16_ReprPC_E005.bed	NA	8599
hyper	13	chromHMM_state16_ReprPC	Inf	3.2733	15744	1	75	3	75	26.3	71333	44005	652577	chromHMM_state16_ReprPC IMR90_Cell_Line human	IMR90_Cell_Line	NA	human	LUNG	CellLine	16_ReprPC_E017.bed	NA	49427
hyper	95	chromHMM_state16_ReprPC	Inf	4.52753	10807	1	58	21	58	26.7	33664	48942	690246	chromHMM_state16_ReprPC NHDF-Ad_Adult_Dermal_Fibroblasts human	NHDF-Ad_Adult_Dermal_Fibroblasts	NA	human	SKIN	PrimaryCulture	16_ReprPC_E126.bed	NA	22378
hyper	57	chromHMM_state16_ReprPC	Inf	4.0326	12108	1	63	17	63	27	42920	47641	680990	chromHMM_state16_ReprPC Fetal_Intestine_Large human	Fetal_Intestine_Large	NA	human	GI_INTESTINE	PrimaryTissue	16_ReprPC_E084.bed	NA	23795
hyper	46	chromHMM_state16_ReprPC	Inf	6.92584	5431	1	9	72	72	27.3	10302	54318	713608	chromHMM_state16_ReprPC Brain_Anterior_Caudate human	Brain_Anterior_Caudate	NA	human	BRAIN	PrimaryTissue	16_ReprPC_E068.bed	NA	6163
hyper	59	chromHMM_state16_ReprPC	Inf	6.17351	6731	1	20	61	61	27.3	14587	53018	709323	chromHMM_state16_ReprPC Pancreatic_Islets human	Pancreatic_Islets	NA	human	PANCREAS	PrimaryTissue	16_ReprPC_E087.bed	NA	8514
hyper	9	chromHMM_state16_ReprPC	Inf	6.04642	6991	1	24	58	58	27.7	15526	52758	708384	chromHMM_state16_ReprPC hESC_Derived_CD56+_Mesoderm_Cultured_Cells human	hESC_Derived_CD56+_Mesoderm_Cultured_Cells	NA	human	ESC_DERIVED	ESCDerived	16_ReprPC_E013.bed	NA	8112
hyper	52	chromHMM_state16_ReprPC	Inf	6.01227	7195	1	28	55	55	28	16119	52554	707791	chromHMM_state16_ReprPC Colonic_Mucosa human	Colonic_Mucosa	NA	human	GI_COLON	PrimaryTissue	16_ReprPC_E075.bed	NA	9455
hyper	58	chromHMM_state16_ReprPC	Inf	4.42266	10328	1	59	24	59	28	32663	49421	691247	chromHMM_state16_ReprPC Fetal_Intestine_Small human	Fetal_Intestine_Small	NA	human	GI_INTESTINE	PrimaryTissue	16_ReprPC_E085.bed	NA	18863
hyper	71	chromHMM_state16_ReprPC	Inf	7.00479	5127	1	8	75	75	28	9572	54622	714338	chromHMM_state16_ReprPC Psoas_Muscle human	Psoas_Muscle	NA	human	MUSCLE	PrimaryTissue	16_ReprPC_E100.bed	NA	5954
hyper	51	chromHMM_state16_ReprPC	Inf	6.28981	6447	1	18	66	66	28.3	13658	53302	710252	chromHMM_state16_ReprPC Brain_Substantia_Nigra human	Brain_Substantia_Nigra	NA	human	BRAIN	PrimaryTissue	16_ReprPC_E074.bed	NA	7066
hyper	21	chromHMM_state16_ReprPC	Inf	2.91917	13961	1	79	6	79	28.7	68460	45788	655450	chromHMM_state16_ReprPC CD3_Primary_Cells_Peripheral_UW human	CD3_Primary_Cells_Peripheral_UW	NA	human	BLOOD	PrimaryCell	16_ReprPC_E034.bed	NA	53720
hyper	34	chromHMM_state16_ReprPC	Inf	3.49688	12316	1	70	15	70	28.7	50033	47433	673877	chromHMM_state16_ReprPC Chondrocytes_from_Bone_Marrow_Derived_Mesenchymal_Stem_C	Chondrocytes_from_Bone_Marrow_Derived_Mesenchymal_Stem_Cell_Cultured_Cells	NA	human	STROMAL_CONNECTIVE	PrimaryCulture	16_ReprPC_E049.bed	NA	38925
hyper	50	chromHMM_state16_ReprPC	Inf	6.07271	6700	1	23	62	62	28.7	14750	53049	709160	chromHMM_state16_ReprPC Brain_Mid_Frontal_Lobe human	Brain_Mid_Frontal_Lobe	NA	human	BRAIN	PrimaryTissue	16_ReprPC_E073.bed	NA	8230
hyper	66	chromHMM_state16_ReprPC	Inf	5.59244	7701	1	39	48	48	29.3	18658	52048	705252	chromHMM_state16_ReprPC Left_Ventricle human	Left_Ventricle	NA	human	HEART	PrimaryTissue	16_ReprPC_E095.bed	NA	13716
hyper	89	chromHMM_state16_ReprPC	Inf	5.08701	8321	1	46	41	46	29.3	22315	51428	701595	chromHMM_state16_ReprPC HSMM_Skeletal_Muscle_Myoblasts human	HSMM_Skeletal_Muscle_Myoblasts	NA	human	MUSCLE	PrimaryCulture	16_ReprPC_E120.bed	NA	15574
hyper	90	chromHMM_state16_ReprPC	Inf	3.73773	11597	1	68	20	68	29.7	43825	48152	680085	chromHMM_state16_ReprPC HSMMtube_Skeletal_Muscle_Myotubes_Derived_from_HSMM huma	HSMMtube_Skeletal_Muscle_Myotubes_Derived_from_HSMM	NA	human	MUSCLE	PrimaryCulture	16_ReprPC_E121.bed	NA	36908
hyper	23	chromHMM_state16_ReprPC	Inf	7.11914	3709	1	5	84	84	30	6668	56040	717242	chromHMM_state16_ReprPC CD4_Naive_Primary_Cells human	CD4_Naive_Primary_Cells	NA	human	BLOOD	PrimaryCell	16_ReprPC_E038.bed	NA	4796
hyper	20	chromHMM_state16_ReprPC	Inf	5.65075	7360	1	38	52	52	30.3	17560	52389	706350	chromHMM_state16_ReprPC CD19_Primary_Cells_Peripheral_UW human	CD19_Primary_Cells_Peripheral_UW	NA	human	BLOOD	PrimaryCell	16_ReprPC_E032.bed	NA	14261
hyper	22	chromHMM_state16_ReprPC	Inf	7.6694	3586	1	3	87	87	30.3	5977	56163	717933	chromHMM_state16_ReprPC CD4_Memory_Primary_Cells human	CD4_Memory_Primary_Cells	NA	human	BLOOD	PrimaryCell	16_ReprPC_E037.bed	NA	4399
hyper	85	chromHMM_state16_ReprPC	Inf	5.69927	7308	1	37	53	53	30.3	17277	52441	706633	chromHMM_state16_ReprPC GM12878_Lymphoblastoid human	GM12878_Lymphoblastoid	NA	human	BLOOD	PrimaryCulture	16_ReprPC_E116.bed	NA	9691
hyper	24	chromHMM_state16_ReprPC	Inf	6.03015	6514	1	26	65	65	30.7	14399	53235	709511	chromHMM_state16_ReprPC CD4+_CD25-_CD45RA+_Naive_Primary_Cells human	CD4+_CD25-_CD45RA+_Naive_Primary_Cells	NA	human	BLOOD	PrimaryCell	16_ReprPC_E039.bed	NA	9203
hyper	49	chromHMM_state16_ReprPC	Inf	5.87097	6763	1	31	60	60	30.7	15401	52986	708509	chromHMM_state16_ReprPC Brain_Inferior_Temporal_Lobe human	Brain_Inferior_Temporal_Lobe	NA	human	BRAIN	PrimaryTissue	16_ReprPC_E072.bed	NA	9258
hyper	54	chromHMM_state16_ReprPC	Inf	4.56288	8858	1	56	36	56	31	26600	50891	697310	chromHMM_state16_ReprPC Duodenum_Smooth_Muscle human	Duodenum_Smooth_Muscle	NA	human	GI_DUODENUM	PrimaryTissue	16_ReprPC_E078.bed	NA	14953
hyper	78	chromHMM_state16_ReprPC	Inf	3.74036	10068	1	67	26	67	31.3	37209	49681	686701	chromHMM_state16_ReprPC Skeletal_Muscle_Female human	Skeletal_Muscle_Female	NA	human	MUSCLE	PrimaryTissue	16_ReprPC_E108.bed	NA	22848
hyper	47	chromHMM_state16_ReprPC	Inf	5.24522	7537	1	44	50	50	31.7	19392	52212	704518	chromHMM_state16_ReprPC Brain_Cingulate_Gyrus human	Brain_Cingulate_Gyrus	NA	human	BRAIN	PrimaryTissue	16_ReprPC_E069.bed	NA	12287
hyper	33	chromHMM_state16_ReprPC	Inf	6.387	4676	1	16	80	80	32.3	9497	55073	714413	chromHMM_state16_ReprPC CD8_Memory_Primary_Cells human	CD8_Memory_Primary_Cells	NA	human	BLOOD	PrimaryCell	16_ReprPC_E048.bed	NA	5759
hyper	38	chromHMM_state16_ReprPC	Inf	3.93878	9048	1	64	33	64	32.7	31379	50701	692531	chromHMM_state16_ReprPC Penis_Foreskin_Keratinocyte_Primary_Cells_skin03 human	Penis_Foreskin_Keratinocyte_Primary_Cells_skin03	NA	human	SKIN	PrimaryCulture	16_ReprPC_E058.bed	NA	25278
hyper	87	chromHMM_state16_ReprPC	Inf	2.53541	12451	1	86	13	86	33.3	68092	47298	655818	chromHMM_state16_ReprPC HepG2_Hepatocellular_Carcinoma human	HepG2_Hepatocellular_Carcinoma	NA	human	LIVER	CellLine	16_ReprPC_E118.bed	NA	44781
hyper	82	chromHMM_state16_ReprPC	Inf	7.02633	1895	1	7	94	94	34	3359	57854	720551	chromHMM_state16_ReprPC Spleen human	Spleen	NA	human	SPLEEN	PrimaryTissue	16_ReprPC_E113.bed	NA	2441
hyper	80	chromHMM_state16_ReprPC	Inf	2.95394	9923	1	78	28	78	35.7	45724	49826	678186	chromHMM_state16_ReprPC Stomach_Smooth_Muscle human	Stomach_Smooth_Muscle	NA	human	GI_STOMACH	PrimaryTissue	16_ReprPC_E111.bed	NA	37839
hyper	36	chromHMM_state16_ReprPC	Inf	2.32789	11782	1	90	19	90	36.7	69092	47967	654818	chromHMM_state16_ReprPC Penis_Foreskin_Fibroblast_Primary_Cells_skin01 human	Penis_Foreskin_Fibroblast_Primary_Cells_skin01	NA	human	SKIN	PrimaryCulture	16_ReprPC_E055.bed	NA	52578
hyper	68	chromHMM_state16_ReprPC	Inf	5.95048	4762	1	30	79	79	36.7	10383	54987	713527	chromHMM_state16_ReprPC Ovary human	Ovary	NA	human	OVARY	PrimaryTissue	16_ReprPC_E097.bed	NA	6855
hyper	39	chromHMM_state16_ReprPC	Inf	2.87443	9658	1	81	29	81	37	45502	50091	678408	chromHMM_state16_ReprPC Penis_Foreskin_Melanocyte_Primary_Cells_skin01 human	Penis_Foreskin_Melanocyte_Primary_Cells_skin01	NA	human	SKIN	PrimaryCulture	16_ReprPC_E059.bed	NA	39467
hyper	43	chromHMM_state16_ReprPC	Inf	6.43059	1575	1	15	95	95	37	3035	58174	720875	chromHMM_state16_ReprPC Aorta human	Aorta	NA	human	VASCULAR	PrimaryTissue	16_ReprPC_E065.bed	NA	3934
hyper	42	chromHMM_state16_ReprPC	Inf	3.54861	7874	1	69	43	69	37.7	29693	51875	694217	chromHMM_state16_ReprPC Adipose_Nuclei human	Adipose_Nuclei	NA	human	FAT	PrimaryTissue	16_ReprPC_E063.bed	NA	22903
hyper	35	chromHMM_state16_ReprPC	Inf	3.33135	8428	1	73	40	73	38	34009	51321	689901	chromHMM_state16_ReprPC Mobilized_CD34_Primary_Cells_Female human	Mobilized_CD34_Primary_Cells_Female	NA	human	BLOOD	PrimaryCell	16_ReprPC_E050.bed	NA	24158
hyper	63	chromHMM_state16_ReprPC	Inf	2.48225	9971	1	87	27	87	38.3	54055	49778	669855	chromHMM_state16_ReprPC Fetal_Stomach human	Fetal_Stomach	NA	human	GI_STOMACH	PrimaryTissue	16_ReprPC_E092.bed	NA	39733
hyper	56	chromHMM_state16_ReprPC	Inf	1.87321	11969	1	97	18	97	38.7	85392	47780	638518	chromHMM_state16_ReprPC Fetal_Adrenal_Gland human	Fetal_Adrenal_Gland	NA	human	ADRENAL	PrimaryTissue	16_ReprPC_E080.bed	NA	59666
hyper	7	chromHMM_state16_ReprPC	Inf	3.37877	7723	1	71	47	71	39.7	30466	52026	693444	chromHMM_state16_ReprPC hESC_Derived_CD184+_Endoderm_Cultured_Cells human	hESC_Derived_CD184+_Endoderm_Cultured_Cells	NA	human	ESC_DERIVED	ESCDerived	16_ReprPC_E011.bed	NA	24916
hyper	44	chromHMM_state16_ReprPC	Inf	5.53395	4778	1	40	78	78	39.7	11194	54971	712716	chromHMM_state16_ReprPC Adult_Liver human	Adult_Liver	NA	human	LIVER	PrimaryTissue	16_ReprPC_E066.bed	NA	13233
hyper	37	chromHMM_state16_ReprPC	Inf	2.46442	9526	1	89	30	89	40	51734	50223	672176	chromHMM_state16_ReprPC Penis_Foreskin_Fibroblast_Primary_Cells_skin02 human	Penis_Foreskin_Fibroblast_Primary_Cells_skin02	NA	human	SKIN	PrimaryCulture	16_ReprPC_E056.bed	NA	46665
hyper	16	chromHMM_state16_ReprPC	Inf	5.24165	4954	1	45	76	76	40.7	12274	54795	711636	chromHMM_state16_ReprPC iPS_DF_6.9_Cell_Line human	iPS_DF_6.9_Cell_Line	NA	human	IPSC	PrimaryCulture	16_ReprPC_E021.bed	NA	9574
hyper	40	chromHMM_state16_ReprPC	Inf	3.03648	7578	1	77	49	77	42.3	33048	52171	690862	chromHMM_state16_ReprPC Penis_Foreskin_Melanocyte_Primary_Cells_skin03 human	Penis_Foreskin_Melanocyte_Primary_Cells_skin03	NA	human	SKIN	PrimaryCulture	16_ReprPC_E061.bed	NA	32134
hyper	48	chromHMM_state16_ReprPC	Inf	4.56055	5968	1	57	69	69	42.3	17196	53781	706714	chromHMM_state16_ReprPC Brain_Hippocampus_Middle human	Brain_Hippocampus_Middle	NA	human	BRAIN	PrimaryTissue	16_ReprPC_E071.bed	NA	11982
hyper	61	chromHMM_state16_ReprPC	Inf	2.90357	7789	1	80	46	80	42.3	35541	51960	688369	chromHMM_state16_ReprPC Fetal_Muscle_Leg human	Fetal_Muscle_Leg	NA	human	MUSCLE_LEG	PrimaryTissue	16_ReprPC_E090.bed	NA	35957
hyper	62	chromHMM_state16_ReprPC	Inf	3.37273	7161	1	72	56	72	43	28093	52588	695817	chromHMM_state16_ReprPC Fetal_Placenta human	Fetal_Placenta	NA	human	PLACENTA	PrimaryTissue	16_ReprPC_E091.bed	NA	20230
hyper	4	chromHMM_state16_ReprPC	Inf	3.78761	6529	1	66	64	66	43.7	22709	53220	701201	chromHMM_state16_ReprPC H1_Derived_Mesenchymal_Stem_Cells human	H1_Derived_Mesenchymal_Stem_Cells	NA	human	ESC_DERIVED	ESCDerived	16_ReprPC_E006.bed	NA	24646
hyper	67	chromHMM_state16_ReprPC	Inf	5.40791	2612	1	41	89	89	43.7	6069	57137	717841	chromHMM_state16_ReprPC Lung human	Lung	NA	human	LUNG	PrimaryTissue	16_ReprPC_E096.bed	NA	5577
hyper	6	chromHMM_state16_ReprPC	Inf	4.92595	4031	1	50	83	83	44.7	10478	55718	713432	chromHMM_state16_ReprPC H9_Cell_Line human	H9_Cell_Line	NA	human	ESC	PrimaryCulture	16_ReprPC_E008.bed	NA	8520
hyper	8	chromHMM_state16_ReprPC	Inf	3.20765	6699	1	76	63	76	46.7	27419	53050	696491	chromHMM_state16_ReprPC hESC_Derived_CD56+_Ectoderm_Cultured_Cells human	hESC_Derived_CD56+_Ectoderm_Cultured_Cells	NA	human	ESC_DERIVED	ESCDerived	16_ReprPC_E012.bed	NA	19225
hyper	15	chromHMM_state16_ReprPC	Inf	2.72717	5760	1	83	70	83	51.3	27253	53989	696657	chromHMM_state16_ReprPC iPS-20b_Cell_Line human	iPS-20b_Cell_Line	NA	human	IPSC	PrimaryCulture	16_ReprPC_E020.bed	NA	22774
hyper	17	chromHMM_state16_ReprPC	Inf	4.21582	1929	1	61	93	93	51.7	5684	57820	718226	chromHMM_state16_ReprPC iPS_DF_19.11_Cell_Line human	iPS_DF_19.11_Cell_Line	NA	human	IPSC	PrimaryCulture	16_ReprPC_E022.bed	NA	7334
hyper	83	chromHMM_state16_ReprPC	Inf	2.74636	5248	1	82	74	82	52.3	24521	54501	699389	chromHMM_state16_ReprPC A549_EtOH_0.02pct_Lung_Carcinoma human	A549_EtOH_0.02pct_Lung_Carcinoma	NA	human	LUNG	CellLine	16_ReprPC_E114.bed	NA	25760
hyper	60	chromHMM_state16_ReprPC	Inf	2.13111	6382	1	94	67	94	54	38466	53367	685444	chromHMM_state16_ReprPC Fetal_Muscle_Trunk human	Fetal_Muscle_Trunk	NA	human	MUSCLE	PrimaryTissue	16_ReprPC_E089.bed	NA	42802
hyper	12	chromHMM_state16_ReprPC	Inf	2.66111	4868	1	85	77	85	54.3	23351	54881	700559	chromHMM_state16_ReprPC HUES64_Cell_Line human	HUES64_Cell_Line	NA	human	ESC	PrimaryCulture	16_ReprPC_E016.bed	NA	20836
hyper	76	chromHMM_state16_ReprPC	Inf	3.29918	2516	1	74	90	90	55	9519	57233	714391	chromHMM_state16_ReprPC Right_Ventricle human	Right_Ventricle	NA	human	HEART	PrimaryTissue	16_ReprPC_E105.bed	NA	7306
hyper	10	chromHMM_state16_ReprPC	Inf	2.72656	4399	1	84	82	84	55.7	20503	55350	703407	chromHMM_state16_ReprPC HUES48_Cell_Line human	HUES48_Cell_Line	NA	human	ESC	PrimaryCulture	16_ReprPC_E014.bed	NA	19286
hyper	14	chromHMM_state16_ReprPC	Inf	2.47386	4671	1	88	81	88	56.7	23994	55078	699916	chromHMM_state16_ReprPC iPS-18_Cell_Line human	iPS-18_Cell_Line	NA	human	IPSC	PrimaryCulture	16_ReprPC_E019.bed	NA	22315
hyper	92	chromHMM_state16_ReprPC	Inf	2.15001	3695	1	93	85	93	59.7	21534	56054	702376	chromHMM_state16_ReprPC K562_Leukemia human	K562_Leukemia	NA	human	BLOOD	PrimaryCulture	16_ReprPC_E123.bed	NA	15499
hyper	1	chromHMM_state16_ReprPC	300.307	2.2676	3031	92	92	88	92	90.7	16667	56718	707243	chromHMM_state16_ReprPC H1_Cell_Line human	H1_Cell_Line	NA	human	ESC	PrimaryCulture	16_ReprPC_E003.bed	NA	17438
hyper	11	chromHMM_state16_ReprPC	253.412	1.95033	3689	93	96	86	96	91.7	23628	56060	700282	chromHMM_state16_ReprPC HUES6_Cell_Line human	HUES6_Cell_Line	NA	human	ESC	PrimaryCulture	16_ReprPC_E015.bed	NA	23989
hyper	84	chromHMM_state16_ReprPC	178.559	2.04619	2255	94	95	91	95	93.3	13615	57494	710295	chromHMM_state16_ReprPC Dnd41_TCell_Leukemia human	Dnd41_TCell_Leukemia	NA	human	BLOOD	CellLine	16_ReprPC_E115.bed	NA	15551
hyper	75	chromHMM_state16_ReprPC	143.184	4.81614	485	95	53	96	96	81.3	1228	59264	722682	chromHMM_state16_ReprPC Right_Atrium human	Right_Atrium	NA	human	HEART	PrimaryTissue	16_ReprPC_E104.bed	NA	2627
hyper	65	chromHMM_state16_ReprPC	31.1239	8.75892	65	96	1	97	97	64.7	90	59684	723820	chromHMM_state16_ReprPC Gastric human	Gastric	NA	human	GI_STOMACH	PrimaryTissue	16_ReprPC_E094.bed	NA	323
hyper	86	chromHMM_state16_ReprPC	22.0537	1.26455	2098	97	98	92	98	95.7	20250	57651	703660	chromHMM_state16_ReprPC HeLa-S3_Cervical_Carcinoma human	HeLa-S3_Cervical_Carcinoma	NA	human	CERVIX	CellLine	16_ReprPC_E117.bed	NA	19389
hyper	69	chromHMM_state16_ReprPC	0.762699	2.27174	3	98	91	98	98	95.7	16	59746	723894	chromHMM_state16_ReprPC Pancreas human	Pancreas	NA	human	PANCREAS	PrimaryTissue	16_ReprPC_E098.bed	NA	267
hyper	33	chromHMM_state17_ReprPCWk	Inf	2.47466	12219	1	6	4	6	3.67	68126	47530	655784	chromHMM_state17_ReprPCWk CD8_Memory_Primary_Cells human	CD8_Memory_Primary_Cells	NA	human	BLOOD	PrimaryCell	17_ReprPCWk_E048.bed	0	16457
hyper	43	chromHMM_state17_ReprPCWk	Inf	2.59798	11570	1	5	7	7	4.33	61253	48179	662657	chromHMM_state17_ReprPCWk Aorta human	Aorta	NA	human	VASCULAR	PrimaryTissue	17_ReprPCWk_E065.bed	0	24841
hyper	85	chromHMM_state17_ReprPCWk	Inf	1.87118	13506	1	13	3	13	5.67	97741	46243	626169	chromHMM_state17_ReprPCWk GM12878_Lymphoblastoid human	GM12878_Lymphoblastoid	NA	human	BLOOD	PrimaryCulture	17_ReprPCWk_E116.bed	0	29113
hyper	23	chromHMM_state17_ReprPCWk	Inf	2.9917	10570	1	3	14	14	6	48521	49179	675389	chromHMM_state17_ReprPCWk CD4_Naive_Primary_Cells human	CD4_Naive_Primary_Cells	NA	human	BLOOD	PrimaryCell	17_ReprPCWk_E038.bed	0	14154
hyper	92	chromHMM_state17_ReprPCWk	Inf	1.75626	17222	1	17	2	17	6.67	135644	42527	588266	chromHMM_state17_ReprPCWk K562_Leukemia human	K562_Leukemia	NA	human	BLOOD	PrimaryCulture	17_ReprPCWk_E123.bed	0	33357
hyper	22	chromHMM_state17_ReprPCWk	Inf	2.72682	10362	1	4	16	16	7	51720	49387	672190	chromHMM_state17_ReprPCWk CD4_Memory_Primary_Cells human	CD4_Memory_Primary_Cells	NA	human	BLOOD	PrimaryCell	17_ReprPCWk_E037.bed	0	14916
hyper	84	chromHMM_state17_ReprPCWk	Inf	1.6934	17597	1	22	1	22	8	143167	42152	580743	chromHMM_state17_ReprPCWk Dnd41_TCell_Leukemia human	Dnd41_TCell_Leukemia	NA	human	BLOOD	CellLine	17_ReprPCWk_E115.bed	0	33069
hyper	30	chromHMM_state17_ReprPCWk	Inf	2.29102	10326	1	7	17	17	8.33	60499	49423	663411	chromHMM_state17_ReprPCWk CD4+_CD25int_CD127+_Tmem_Primary_Cells human	CD4+_CD25int_CD127+_Tmem_Primary_Cells	NA	human	BLOOD	PrimaryCell	17_ReprPCWk_E045.bed	0	16967
hyper	86	chromHMM_state17_ReprPCWk	Inf	1.67429	12145	1	23	5	23	9.67	95722	47604	628188	chromHMM_state17_ReprPCWk HeLa-S3_Cervical_Carcinoma human	HeLa-S3_Cervical_Carcinoma	NA	human	CERVIX	CellLine	17_ReprPCWk_E117.bed	0	31638
hyper	32	chromHMM_state17_ReprPCWk	Inf	1.84549	9998	1	14	21	21	12	71091	49751	652819	chromHMM_state17_ReprPCWk CD8_Naive_Primary_Cells human	CD8_Naive_Primary_Cells	NA	human	BLOOD	PrimaryCell	17_ReprPCWk_E047.bed	0	23189
hyper	25	chromHMM_state17_ReprPCWk	Inf	1.8138	9883	1	15	22	22	12.7	71306	49866	652604	chromHMM_state17_ReprPCWk CD4+_CD25-_CD45RO+_Memory_Primary_Cells human	CD4+_CD25-_CD45RO+_Memory_Primary_Cells	NA	human	BLOOD	PrimaryCell	17_ReprPCWk_E040.bed	0	23873
hyper	24	chromHMM_state17_ReprPCWk	Inf	1.9604	9091	1	11	27	27	13	60711	50658	663199	chromHMM_state17_ReprPCWk CD4+_CD25-_CD45RA+_Naive_Primary_Cells human	CD4+_CD25-_CD45RA+_Naive_Primary_Cells	NA	human	BLOOD	PrimaryCell	17_ReprPCWk_E039.bed	0	20376
hyper	27	chromHMM_state17_ReprPCWk	Inf	1.63991	10844	1	25	13	25	13	86223	48905	637687	chromHMM_state17_ReprPCWk CD4+_CD25-_IL17+_PMA-Ionomcyin_stimulated_Th17_Primary	CD4+_CD25-_IL17+_PMA-Ionomcyin_stimulated_Th17_Primary_Cells	NA	human	BLOOD	PrimaryCell	17_ReprPCWk_E042.bed	0	25583
hyper	20	chromHMM_state17_ReprPCWk	Inf	1.67415	10131	1	24	18	24	14.3	78691	49618	645219	chromHMM_state17_ReprPCWk CD19_Primary_Cells_Peripheral_UW human	CD19_Primary_Cells_Peripheral_UW	NA	human	BLOOD	PrimaryCell	17_ReprPCWk_E032.bed	0	29888
hyper	71	chromHMM_state17_ReprPCWk	Inf	1.73876	9427	1	19	24	24	14.7	70408	50322	653502	chromHMM_state17_ReprPCWk Psoas_Muscle human	Psoas_Muscle	NA	human	MUSCLE	PrimaryTissue	17_ReprPCWk_E100.bed	0	20062
hyper	74	chromHMM_state17_ReprPCWk	Inf	1.75071	8276	1	18	37	37	18.7	60891	51473	663019	chromHMM_state17_ReprPCWk Rectal_Smooth_Muscle human	Rectal_Smooth_Muscle	NA	human	GI_RECTUM	PrimaryTissue	17_ReprPCWk_E103.bed	0	16873
hyper	68	chromHMM_state17_ReprPCWk	Inf	1.78278	8099	1	16	40	40	19	58523	51650	665387	chromHMM_state17_ReprPCWk Ovary human	Ovary	NA	human	OVARY	PrimaryTissue	17_ReprPCWk_E097.bed	0	24460
hyper	67	chromHMM_state17_ReprPCWk	Inf	2.12022	5947	1	9	69	69	26.3	35870	53802	688040	chromHMM_state17_ReprPCWk Lung human	Lung	NA	human	LUNG	PrimaryTissue	17_ReprPCWk_E096.bed	0	22257
hyper	75	chromHMM_state17_ReprPCWk	Inf	1.93408	5916	1	12	71	71	28	38922	53833	684988	chromHMM_state17_ReprPCWk Right_Atrium human	Right_Atrium	NA	human	HEART	PrimaryTissue	17_ReprPCWk_E104.bed	0	20585
hyper	82	chromHMM_state17_ReprPCWk	Inf	3.12726	3584	1	2	86	86	29.7	14476	56165	709434	chromHMM_state17_ReprPCWk Spleen human	Spleen	NA	human	SPLEEN	PrimaryTissue	17_ReprPCWk_E113.bed	0	7884
hyper	65	chromHMM_state17_ReprPCWk	Inf	4.31698	3033	1	1	89	89	30.3	8858	56716	715052	chromHMM_state17_ReprPCWk Gastric human	Gastric	NA	human	GI_STOMACH	PrimaryTissue	17_ReprPCWk_E094.bed	0	5558
hyper	73	chromHMM_state17_ReprPCWk	294.159	1.62277	8194	22	26	38	38	28.7	64576	51555	659334	chromHMM_state17_ReprPCWk Rectal_Mucosa.Donor_31 human	Rectal_Mucosa.Donor_31	NA	human	GI_RECTUM	PrimaryTissue	17_ReprPCWk_E102.bed	3.08934e-294	22041
hyper	55	chromHMM_state17_ReprPCWk	281.942	1.73827	5953	23	20	68	68	37	43326	53796	680584	chromHMM_state17_ReprPCWk Esophagus human	Esophagus	NA	human	GI_ESOPHAGUS	PrimaryTissue	17_ReprPCWk_E079.bed	4.86801e-282	20193
hyper	53	chromHMM_state17_ReprPCWk	280.593	1.73018	6023	24	21	66	66	37	44051	53726	679859	chromHMM_state17_ReprPCWk Colon_Smooth_Muscle human	Colon_Smooth_Muscle	NA	human	GI_COLON	PrimaryTissue	17_ReprPCWk_E076.bed	1.04128e-280	14862
hyper	76	chromHMM_state17_ReprPCWk	269.596	1.57392	8522	25	28	34	34	29	69200	51227	654710	chromHMM_state17_ReprPCWk Right_Ventricle human	Right_Ventricle	NA	human	HEART	PrimaryTissue	17_ReprPCWk_E105.bed	9.94032e-270	19802
hyper	52	chromHMM_state17_ReprPCWk	249.309	1.60024	7228	26	27	52	52	35	57326	52521	666584	chromHMM_state17_ReprPCWk Colonic_Mucosa human	Colonic_Mucosa	NA	human	GI_COLON	PrimaryTissue	17_ReprPCWk_E075.bed	1.85222e-249	17062
hyper	89	chromHMM_state17_ReprPCWk	234.177	1.4655	10552	27	31	15	31	24.3	92422	49197	631488	chromHMM_state17_ReprPCWk HSMM_Skeletal_Muscle_Myoblasts human	HSMM_Skeletal_Muscle_Myoblasts	NA	human	MUSCLE	PrimaryCulture	17_ReprPCWk_E120.bed	2.4156e-234	33353
hyper	59	chromHMM_state17_ReprPCWk	228.491	1.44858	10998	28	34	12	34	24.7	97547	48751	626363	chromHMM_state17_ReprPCWk Pancreatic_Islets human	Pancreatic_Islets	NA	human	PANCREAS	PrimaryTissue	17_ReprPCWk_E087.bed	1.13121e-228	26674
hyper	72	chromHMM_state17_ReprPCWk	228.315	1.51232	8584	29	30	33	33	30.7	72288	51165	651622	chromHMM_state17_ReprPCWk Rectal_Mucosa.Donor_29 human	Rectal_Mucosa.Donor_29	NA	human	GI_RECTUM	PrimaryTissue	17_ReprPCWk_E101.bed	1.63461e-228	24331
hyper	51	chromHMM_state17_ReprPCWk	209.211	1.53054	7309	30	29	51	51	36.7	60420	52440	663490	chromHMM_state17_ReprPCWk Brain_Substantia_Nigra human	Brain_Substantia_Nigra	NA	human	BRAIN	PrimaryTissue	17_ReprPCWk_E074.bed	2.00944e-209	20059
hyper	5	chromHMM_state17_ReprPCWk	203.785	2.01444	2692	31	10	94	94	45	16567	57057	707343	chromHMM_state17_ReprPCWk H1_Derived_Neuronal_Progenitor_Cultured_Cells human	H1_Derived_Neuronal_Progenitor_Cultured_Cells	NA	human	ESC_DERIVED	ESCDerived	17_ReprPCWk_E007.bed	5.19183e-204	11235
hyper	88	chromHMM_state17_ReprPCWk	168.648	1.45006	7638	32	33	48	48	37.7	66455	52111	657455	chromHMM_state17_ReprPCWk HMEC_Mammary_Epithelial human	HMEC_Mammary_Epithelial	NA	human	BREAST	PrimaryCulture	17_ReprPCWk_E119.bed	6.88877e-169	25424
hyper	31	chromHMM_state17_ReprPCWk	152.588	1.4119	7999	33	35	42	42	36.7	71431	51750	652479	chromHMM_state17_ReprPCWk CD56_Primary_Cells human	CD56_Primary_Cells	NA	human	BLOOD	PrimaryCell	17_ReprPCWk_E046.bed	7.66674e-153	30821
hyper	83	chromHMM_state17_ReprPCWk	152.017	1.39321	8685	34	36	31	36	33.7	78759	51064	645151	chromHMM_state17_ReprPCWk A549_EtOH_0.02pct_Lung_Carcinoma human	A549_EtOH_0.02pct_Lung_Carcinoma	NA	human	LUNG	CellLine	17_ReprPCWk_E114.bed	2.77165e-152	40114
hyper	77	chromHMM_state17_ReprPCWk	148.507	1.33805	11391	35	42	9	42	28.7	108363	48358	615547	chromHMM_state17_ReprPCWk Sigmoid_Colon human	Sigmoid_Colon	NA	human	GI_COLON	PrimaryTissue	17_ReprPCWk_E106.bed	8.70723e-149	34666
hyper	95	chromHMM_state17_ReprPCWk	146.978	1.35601	10118	36	40	19	40	31.7	94610	49631	629300	chromHMM_state17_ReprPCWk NHDF-Ad_Adult_Dermal_Fibroblasts human	NHDF-Ad_Adult_Dermal_Fibroblasts	NA	human	SKIN	PrimaryCulture	17_ReprPCWk_E126.bed	2.86534e-147	41251
hyper	97	chromHMM_state17_ReprPCWk	131.036	1.33308	10056	37	43	20	43	33.3	95407	49693	628503	chromHMM_state17_ReprPCWk NHLF_Lung_Fibroblasts human	NHLF_Lung_Fibroblasts	NA	human	LUNG	PrimaryCulture	17_ReprPCWk_E128.bed	2.43532e-131	33800
hyper	87	chromHMM_state17_ReprPCWk	123.418	1.3058	11139	38	45	11	45	31.3	108071	48610	615839	chromHMM_state17_ReprPCWk HepG2_Hepatocellular_Carcinoma human	HepG2_Hepatocellular_Carcinoma	NA	human	LIVER	CellLine	17_ReprPCWk_E118.bed	9.85436e-124	61087
hyper	70	chromHMM_state17_ReprPCWk	119.959	1.45026	5219	39	32	77	77	49.3	44816	54530	679094	chromHMM_state17_ReprPCWk Placenta_Amnion human	Placenta_Amnion	NA	human	PLACENTA	PrimaryTissue	17_ReprPCWk_E099.bed	2.76384e-120	13003
hyper	45	chromHMM_state17_ReprPCWk	114.042	1.38774	6412	40	37	60	60	45.7	57711	53337	666199	chromHMM_state17_ReprPCWk Brain_Angular_Gyrus human	Brain_Angular_Gyrus	NA	human	BRAIN	PrimaryTissue	17_ReprPCWk_E067.bed	2.22428e-114	19523
hyper	44	chromHMM_state17_ReprPCWk	102.508	1.29642	9452	41	47	23	47	37	91650	50297	632260	chromHMM_state17_ReprPCWk Adult_Liver human	Adult_Liver	NA	human	LIVER	PrimaryTissue	17_ReprPCWk_E066.bed	7.42622e-103	39478
hyper	46	chromHMM_state17_ReprPCWk	96.3499	1.382	5458	42	38	75	75	51.7	49089	54291	674821	chromHMM_state17_ReprPCWk Brain_Anterior_Caudate human	Brain_Anterior_Caudate	NA	human	BRAIN	PrimaryTissue	17_ReprPCWk_E068.bed	1.0426e-96	20774
hyper	9	chromHMM_state17_ReprPCWk	96.1183	1.37801	5546	43	39	74	74	52	50036	54203	673874	chromHMM_state17_ReprPCWk hESC_Derived_CD56+_Mesoderm_Cultured_Cells human	hESC_Derived_CD56+_Mesoderm_Cultured_Cells	NA	human	ESC_DERIVED	ESCDerived	17_ReprPCWk_E013.bed	1.73561e-96	19988
hyper	69	chromHMM_state17_ReprPCWk	87.7553	2.27088	854	44	8	98	98	50	4593	58895	719317	chromHMM_state17_ReprPCWk Pancreas human	Pancreas	NA	human	PANCREAS	PrimaryTissue	17_ReprPCWk_E098.bed	3.91224e-88	5471
hyper	90	chromHMM_state17_ReprPCWk	86.0435	1.24572	11299	45	53	10	53	36	114152	48450	609758	chromHMM_state17_ReprPCWk HSMMtube_Skeletal_Muscle_Myotubes_Derived_from_HSMM hu	HSMMtube_Skeletal_Muscle_Myotubes_Derived_from_HSMM	NA	human	MUSCLE	PrimaryCulture	17_ReprPCWk_E121.bed	1.97021e-86	61205
hyper	28	chromHMM_state17_ReprPCWk	73.9257	1.25892	8401	46	49	36	49	43.7	83259	51348	640651	chromHMM_state17_ReprPCWk CD4+_CD25-_Th_Primary_Cells human	CD4+_CD25-_Th_Primary_Cells	NA	human	BLOOD	PrimaryCell	17_ReprPCWk_E043.bed	2.52778e-74	28975
hyper	94	chromHMM_state17_ReprPCWk	72.9945	1.25184	8754	47	51	30	51	42.7	87298	50995	636612	chromHMM_state17_ReprPCWk NH-A_Astrocytes human	NH-A_Astrocytes	NA	human	BRAIN	PrimaryCulture	17_ReprPCWk_E125.bed	2.11164e-73	34953
hyper	29	chromHMM_state17_ReprPCWk	71.6931	1.24822	8825	48	52	28	52	42.7	88252	50924	635658	chromHMM_state17_ReprPCWk CD4+_CD25+_CD127-_Treg_Primary_Cells human	CD4+_CD25+_CD127-_Treg_Primary_Cells	NA	human	BLOOD	PrimaryCell	17_ReprPCWk_E044.bed	4.13846e-72	29637
hyper	41	chromHMM_state17_ReprPCWk	67.9902	1.23709	9101	49	54	26	54	43	91814	50648	632096	chromHMM_state17_ReprPCWk Peripheral_Blood_Mononuclear_Primary_Cells human	Peripheral_Blood_Mononuclear_Primary_Cells	NA	human	BLOOD	PrimaryCell	17_ReprPCWk_E062.bed	2.04559e-68	30462
hyper	50	chromHMM_state17_ReprPCWk	64.7949	1.27532	6391	50	48	62	62	53.3	62151	53358	661759	chromHMM_state17_ReprPCWk Brain_Mid_Frontal_Lobe human	Brain_Mid_Frontal_Lobe	NA	human	BRAIN	PrimaryTissue	17_ReprPCWk_E073.bed	3.1432e-65	20865
hyper	54	chromHMM_state17_ReprPCWk	59.2935	1.25639	6623	51	50	58	58	53	65346	53126	658564	chromHMM_state17_ReprPCWk Duodenum_Smooth_Muscle human	Duodenum_Smooth_Muscle	NA	human	GI_DUODENUM	PrimaryTissue	17_ReprPCWk_E078.bed	9.77495e-60	23631
hyper	62	chromHMM_state17_ReprPCWk	59.0514	1.23674	7715	52	55	47	55	51.3	77496	52034	646414	chromHMM_state17_ReprPCWk Fetal_Placenta human	Fetal_Placenta	NA	human	PLACENTA	PrimaryTissue	17_ReprPCWk_E091.bed	1.67409e-59	36225
hyper	18	chromHMM_state17_ReprPCWk	56.9836	1.21776	8774	53	56	29	56	46	89649	50975	634261	chromHMM_state17_ReprPCWk Bone_Marrow_Derived_Mesenchymal_Stem_Cell_Cultured_Cel	Bone_Marrow_Derived_Mesenchymal_Stem_Cell_Cultured_Cells	NA	human	STROMAL_CONNECTIVE	PrimaryCulture	17_ReprPCWk_E026.bed	1.9204e-57	48881
hyper	3	chromHMM_state17_ReprPCWk	55.2236	1.3428	3595	54	41	85	85	60	32943	56154	690967	chromHMM_state17_ReprPCWk H1_BMP4_Derived_Trophoblast_Cultured_Cells human	H1_BMP4_Derived_Trophoblast_Cultured_Cells	NA	human	ESC_DERIVED	ESCDerived	17_ReprPCWk_E005.bed	1.08459e-55	19570
hyper	2	chromHMM_state17_ReprPCWk	51.0334	1.32397	3644	55	44	84	84	61	33852	56105	690058	chromHMM_state17_ReprPCWk H1_BMP4_Derived_Mesendoderm_Cultured_Cells human	H1_BMP4_Derived_Mesendoderm_Cultured_Cells	NA	human	ESC_DERIVED	ESCDerived	17_ReprPCWk_E004.bed	1.64996e-51	17819
hyper	96	chromHMM_state17_ReprPCWk	50.0325	1.20374	8615	56	61	32	61	49.7	88879	51134	635031	chromHMM_state17_ReprPCWk NHEK-Epidermal_Keratinocytes human	NHEK-Epidermal_Keratinocytes	NA	human	SKIN	PrimaryCulture	17_ReprPCWk_E127.bed	1.62375e-50	39640
hyper	79	chromHMM_state17_ReprPCWk	49.1836	1.17679	11517	57	65	8	65	43.3	122113	48232	601797	chromHMM_state17_ReprPCWk Small_Intestine human	Small_Intestine	NA	human	GI_INTESTINE	PrimaryTissue	17_ReprPCWk_E109.bed	1.12652e-49	36123
hyper	98	chromHMM_state17_ReprPCWk	45.9161	1.18606	9408	58	62	25	62	48.3	98536	50341	625374	chromHMM_state17_ReprPCWk Osteoblasts human	Osteoblasts	NA	human	BONE	PrimaryCulture	17_ReprPCWk_E129.bed	2.04955e-46	50242
hyper	81	chromHMM_state17_ReprPCWk	40.0809	1.20985	6250	59	58	64	64	60.3	63746	53499	660164	chromHMM_state17_ReprPCWk Thymus human	Thymus	NA	human	THYMUS	PrimaryTissue	17_ReprPCWk_E112.bed	1.37876e-40	23708
hyper	78	chromHMM_state17_ReprPCWk	37.7631	1.18405	7596	60	63	49	63	57.3	79292	52153	644618	chromHMM_state17_ReprPCWk Skeletal_Muscle_Female human	Skeletal_Muscle_Female	NA	human	MUSCLE	PrimaryTissue	17_ReprPCWk_E108.bed	2.81805e-38	34900
hyper	49	chromHMM_state17_ReprPCWk	37.4982	1.20576	6018	61	60	67	67	62.7	61528	53731	662382	chromHMM_state17_ReprPCWk Brain_Inferior_Temporal_Lobe human	Brain_Inferior_Temporal_Lobe	NA	human	BRAIN	PrimaryTissue	17_ReprPCWk_E072.bed	5.1019e-38	24180
hyper	42	chromHMM_state17_ReprPCWk	37.4256	1.17787	8069	62	64	41	64	55.7	84726	51680	639184	chromHMM_state17_ReprPCWk Adipose_Nuclei human	Adipose_Nuclei	NA	human	FAT	PrimaryTissue	17_ReprPCWk_E063.bed	5.93234e-38	42048
hyper	66	chromHMM_state17_ReprPCWk	33.5542	1.16968	7811	63	66	44	66	57.7	82471	51938	641439	chromHMM_state17_ReprPCWk Left_Ventricle human	Left_Ventricle	NA	human	HEART	PrimaryTissue	17_ReprPCWk_E095.bed	4.34166e-34	35330
hyper	6	chromHMM_state17_ReprPCWk	32.1283	1.30016	2526	64	46	95	95	68.3	23771	57223	700139	chromHMM_state17_ReprPCWk H9_Cell_Line human	H9_Cell_Line	NA	human	ESC	PrimaryCulture	17_ReprPCWk_E008.bed	1.13957e-32	15468
hyper	64	chromHMM_state17_ReprPCWk	25.3728	1.20978	3732	65	59	83	83	69	37785	56017	686125	chromHMM_state17_ReprPCWk Fetal_Thymus human	Fetal_Thymus	NA	human	THYMUS	PrimaryTissue	17_ReprPCWk_E093.bed	6.39042e-26	20406
hyper	26	chromHMM_state17_ReprPCWk	23.3958	1.13572	8100	66	67	39	67	57.3	87831	51649	636079	chromHMM_state17_ReprPCWk CD4+_CD25-_IL17-_PMA-Ionomycin_stimulated_MACS_purifie	CD4+_CD25-_IL17-_PMA-Ionomycin_stimulated_MACS_purified_Th_Primary_Cells	NA	human	BLOOD	PrimaryCell	17_ReprPCWk_E041.bed	5.96902e-24	31683
hyper	4	chromHMM_state17_ReprPCWk	20.4609	1.12988	7553	67	70	50	70	62.3	82184	52196	641726	chromHMM_state17_ReprPCWk H1_Derived_Mesenchymal_Stem_Cells human	H1_Derived_Mesenchymal_Stem_Cells	NA	human	ESC_DERIVED	ESCDerived	17_ReprPCWk_E006.bed	5.06165e-21	42436
hyper	47	chromHMM_state17_ReprPCWk	19.7617	1.13539	6634	68	68	57	68	64.3	71740	53115	652170	chromHMM_state17_ReprPCWk Brain_Cingulate_Gyrus human	Brain_Cingulate_Gyrus	NA	human	BRAIN	PrimaryTissue	17_ReprPCWk_E069.bed	2.49467e-20	26699
hyper	34	chromHMM_state17_ReprPCWk	18.8194	1.1225	7737	69	71	46	71	62	84710	52012	639200	chromHMM_state17_ReprPCWk Chondrocytes_from_Bone_Marrow_Derived_Mesenchymal_Stem	Chondrocytes_from_Bone_Marrow_Derived_Mesenchymal_Stem_Cell_Cultured_Cells	NA	human	STROMAL_CONNECTIVE	PrimaryCulture	17_ReprPCWk_E049.bed	2.15265e-19	58976
hyper	16	chromHMM_state17_ReprPCWk	16.965	1.21435	2295	70	57	96	96	74.3	23054	57454	700856	chromHMM_state17_ReprPCWk iPS_DF_6.9_Cell_Line human	iPS_DF_6.9_Cell_Line	NA	human	IPSC	PrimaryCulture	17_ReprPCWk_E021.bed	1.51759e-17	15278
hyper	91	chromHMM_state17_ReprPCWk	16.69	1.11271	7985	71	72	43	72	62	88141	51764	635769	chromHMM_state17_ReprPCWk HUVEC_Umbilical_Vein_Endothelial_Cells human	HUVEC_Umbilical_Vein_Endothelial_Cells	NA	human	VASCULAR	PrimaryCulture	17_ReprPCWk_E122.bed	2.81809e-17	44911
hyper	48	chromHMM_state17_ReprPCWk	12.0922	1.10364	6412	72	73	60	73	68.3	71110	53337	652800	chromHMM_state17_ReprPCWk Brain_Hippocampus_Middle human	Brain_Hippocampus_Middle	NA	human	BRAIN	PrimaryTissue	17_ReprPCWk_E071.bed	1.10069e-12	26851
hyper	38	chromHMM_state17_ReprPCWk	11.1952	1.09054	7790	73	75	45	75	64.3	87495	51959	636415	chromHMM_state17_ReprPCWk Penis_Foreskin_Keratinocyte_Primary_Cells_skin03 human	Penis_Foreskin_Keratinocyte_Primary_Cells_skin03	NA	human	SKIN	PrimaryCulture	17_ReprPCWk_E058.bed	8.56418e-12	42621
hyper	19	chromHMM_state17_ReprPCWk	7.56779	1.09075	4743	74	74	80	80	76	53036	55006	670874	chromHMM_state17_ReprPCWk CD14_Primary_Cells human	CD14_Primary_Cells	NA	human	BLOOD	PrimaryCell	17_ReprPCWk_E029.bed	3.58266e-08	31740
hyper	17	chromHMM_state17_ReprPCWk	5.49015	1.13023	1580	75	69	97	97	80.3	16989	58169	706921	chromHMM_state17_ReprPCWk iPS_DF_19.11_Cell_Line human	iPS_DF_19.11_Cell_Line	NA	human	IPSC	PrimaryCulture	17_ReprPCWk_E022.bed	4.22681e-06	16967
hyper	39	chromHMM_state17_ReprPCWk	5.31061	1.06035	7134	76	78	53	78	69	82074	52615	641836	chromHMM_state17_ReprPCWk Penis_Foreskin_Melanocyte_Primary_Cells_skin01 human	Penis_Foreskin_Melanocyte_Primary_Cells_skin01	NA	human	SKIN	PrimaryCulture	17_ReprPCWk_E059.bed	6.30665e-06	53425
hyper	7	chromHMM_state17_ReprPCWk	4.54328	1.06911	4336	77	76	81	81	78	49371	55413	674539	chromHMM_state17_ReprPCWk hESC_Derived_CD184+_Endoderm_Cultured_Cells human	hESC_Derived_CD184+_Endoderm_Cultured_Cells	NA	human	ESC_DERIVED	ESCDerived	17_ReprPCWk_E011.bed	3.64294e-05	38097
hyper	58	chromHMM_state17_ReprPCWk	3.96726	1.05477	5891	78	79	72	79	76.3	68017	53858	655893	chromHMM_state17_ReprPCWk Fetal_Intestine_Small human	Fetal_Intestine_Small	NA	human	GI_INTESTINE	PrimaryTissue	17_ReprPCWk_E085.bed	0.000135479	30168
hyper	10	chromHMM_state17_ReprPCWk	3.00817	1.06613	2722	79	77	93	93	83	31022	57027	692888	chromHMM_state17_ReprPCWk HUES48_Cell_Line human	HUES48_Cell_Line	NA	human	ESC	PrimaryCulture	17_ReprPCWk_E014.bed	0.00121737	23401
hyper	15	chromHMM_state17_ReprPCWk	2.87741	1.05363	3916	80	80	82	82	80.7	45182	55833	678728	chromHMM_state17_ReprPCWk iPS-20b_Cell_Line human	iPS-20b_Cell_Line	NA	human	IPSC	PrimaryCulture	17_ReprPCWk_E020.bed	0.00162452	26939
hyper	35	chromHMM_state17_ReprPCWk	2.59942	1.04456	4975	81	81	79	81	80.3	57911	54774	665999	chromHMM_state17_ReprPCWk Mobilized_CD34_Primary_Cells_Female human	Mobilized_CD34_Primary_Cells_Female	NA	human	BLOOD	PrimaryCell	17_ReprPCWk_E050.bed	0.00304314	34413
hyper	80	chromHMM_state17_ReprPCWk	2.1358	1.03042	8476	82	84	35	84	67	100082	51273	623828	chromHMM_state17_ReprPCWk Stomach_Smooth_Muscle human	Stomach_Smooth_Muscle	NA	human	GI_STOMACH	PrimaryTissue	17_ReprPCWk_E111.bed	0.00874207	54759
hyper	14	chromHMM_state17_ReprPCWk	1.80432	1.04342	2983	83	82	90	90	85	34710	56766	689200	chromHMM_state17_ReprPCWk iPS-18_Cell_Line human	iPS-18_Cell_Line	NA	human	IPSC	PrimaryCulture	17_ReprPCWk_E019.bed	0.0185279	24572
hyper	93	chromHMM_state17_ReprPCWk	1.70836	1.03225	5073	84	83	78	84	81.7	59702	54676	664208	chromHMM_state17_ReprPCWk Monocytes-CD14+_RO01746 human	Monocytes-CD14+_RO01746	NA	human	BLOOD	PrimaryCell	17_ReprPCWk_E124.bed	0.022834	36966
hyper	37	chromHMM_state17_ReprPCWk	0.619498	1.00962	6749	85	86	55	86	75.3	81078	53000	642832	chromHMM_state17_ReprPCWk Penis_Foreskin_Fibroblast_Primary_Cells_skin02 human	Penis_Foreskin_Fibroblast_Primary_Cells_skin02	NA	human	SKIN	PrimaryCulture	17_ReprPCWk_E056.bed	0.276891	51060
hyper	12	chromHMM_state17_ReprPCWk	0.569598	1.01267	2785	86	85	92	92	87.7	33340	56964	690570	chromHMM_state17_ReprPCWk HUES64_Cell_Line human	HUES64_Cell_Line	NA	human	ESC	PrimaryCulture	17_ReprPCWk_E016.bed	0.306994	23244
hyper	8	chromHMM_state17_ReprPCWk	0.245003	0.996802	3071	87	87	88	88	87.3	37321	56678	686589	chromHMM_state17_ReprPCWk hESC_Derived_CD56+_Ectoderm_Cultured_Cells human	hESC_Derived_CD56+_Ectoderm_Cultured_Cells	NA	human	ESC_DERIVED	ESCDerived	17_ReprPCWk_E012.bed	0.640773	23084
hyper	1	chromHMM_state17_ReprPCWk	0.110922	0.985298	2877	88	88	91	91	89	35352	56872	688558	chromHMM_state17_ReprPCWk H1_Cell_Line human	H1_Cell_Line	NA	human	ESC	PrimaryCulture	17_ReprPCWk_E003.bed	0.862625	23714
hyper	40	chromHMM_state17_ReprPCWk	0.0574956	0.98486	6931	89	89	54	89	77.3	85114	52818	638796	chromHMM_state17_ReprPCWk Penis_Foreskin_Melanocyte_Primary_Cells_skin03 human	Penis_Foreskin_Melanocyte_Primary_Cells_skin03	NA	human	SKIN	PrimaryCulture	17_ReprPCWk_E061.bed	0.964585	49733
hyper	11	chromHMM_state17_ReprPCWk	0.000186064	0.940607	3319	90	92	87	92	89.7	42602	56430	681308	chromHMM_state17_ReprPCWk HUES6_Cell_Line human	HUES6_Cell_Line	NA	human	ESC	PrimaryCulture	17_ReprPCWk_E015.bed	1	31930
hyper	57	chromHMM_state17_ReprPCWk	0.000100132	0.952958	6289	91	90	63	91	81.3	79544	53460	644366	chromHMM_state17_ReprPCWk Fetal_Intestine_Large human	Fetal_Intestine_Large	NA	human	GI_INTESTINE	PrimaryTissue	17_ReprPCWk_E084.bed	1	34843
hyper	36	chromHMM_state17_ReprPCWk	3.9838e-06	0.939858	5582	92	93	73	93	86	71530	54167	652380	chromHMM_state17_ReprPCWk Penis_Foreskin_Fibroblast_Primary_Cells_skin01 human	Penis_Foreskin_Fibroblast_Primary_Cells_skin01	NA	human	SKIN	PrimaryCulture	17_ReprPCWk_E055.bed	1	60237
hyper	60	chromHMM_state17_ReprPCWk	1.57625e-06	0.941821	6705	93	91	56	93	80	85660	53044	638250	chromHMM_state17_ReprPCWk Fetal_Muscle_Trunk human	Fetal_Muscle_Trunk	NA	human	MUSCLE	PrimaryTissue	17_ReprPCWk_E089.bed	1	56852
hyper	63	chromHMM_state17_ReprPCWk	1.10378e-07	0.928842	5381	94	94	76	94	88	69708	54368	654202	chromHMM_state17_ReprPCWk Fetal_Stomach human	Fetal_Stomach	NA	human	GI_STOMACH	PrimaryTissue	17_ReprPCWk_E092.bed	1	50816
hyper	13	chromHMM_state17_ReprPCWk	2.34925e-12	0.912428	6493	95	95	59	95	83	85331	53256	638579	chromHMM_state17_ReprPCWk IMR90_Cell_Line human	IMR90_Cell_Line	NA	human	LUNG	CellLine	17_ReprPCWk_E017.bed	1	66313
hyper	61	chromHMM_state17_ReprPCWk	3.08585e-15	0.897782	5920	96	96	70	96	87.3	79003	53829	644907	chromHMM_state17_ReprPCWk Fetal_Muscle_Leg human	Fetal_Muscle_Leg	NA	human	MUSCLE_LEG	PrimaryTissue	17_ReprPCWk_E090.bed	1	52053
hyper	21	chromHMM_state17_ReprPCWk	0	0.850301	12007	97	97	6	97	66.7	165241	47742	558669	chromHMM_state17_ReprPCWk CD3_Primary_Cells_Peripheral_UW human	CD3_Primary_Cells_Peripheral_UW	NA	human	BLOOD	PrimaryCell	17_ReprPCWk_E034.bed	1	71231
hyper	56	chromHMM_state17_ReprPCWk	0	0.788638	6117	97	98	65	98	86.7	91466	53632	632444	chromHMM_state17_ReprPCWk Fetal_Adrenal_Gland human	Fetal_Adrenal_Gland	NA	human	ADRENAL	PrimaryTissue	17_ReprPCWk_E080.bed	1	76869
hyper	86	chromHMM_state18_Quies	190.052	1.29678	23337	1	1	3	3	1.67	239437	36412	484473	chromHMM_state18_Quies HeLa-S3_Cervical_Carcinoma human	HeLa-S3_Cervical_Carcinoma	NA	human	CERVIX	CellLine	18_Quies_E117.bed	8.69082e-189	49770
hyper	84	chromHMM_state18_Quies	50.4908	1.14629	20016	2	2	10	10	4.67	221009	39733	502901	chromHMM_state18_Quies Dnd41_TCell_Leukemia human	Dnd41_TCell_Leukemia	NA	human	BLOOD	CellLine	18_Quies_E115.bed	1.58264e-49	56011
hyper	83	chromHMM_state18_Quies	4.88913	1.04003	17883	3	3	12	12	6	210755	41866	513155	chromHMM_state18_Quies A549_EtOH_0.02pct_Lung_Carcinoma human	A549_EtOH_0.02pct_Lung_Carcinoma	NA	human	LUNG	CellLine	18_Quies_E114.bed	0.000421667	56751
hyper	23	chromHMM_state18_Quies	0	0.816301	24996	4	8	1	8	4.33	339078	34753	384832	chromHMM_state18_Quies CD4_Naive_Primary_Cells human	CD4_Naive_Primary_Cells	NA	human	BLOOD	PrimaryCell	18_Quies_E038.bed	1	36866
hyper	22	chromHMM_state18_Quies	0	0.80747	23928	4	10	2	10	5.33	327738	35821	396172	chromHMM_state18_Quies CD4_Memory_Primary_Cells human	CD4_Memory_Primary_Cells	NA	human	BLOOD	PrimaryCell	18_Quies_E037.bed	1	44273
hyper	65	chromHMM_state18_Quies	0	0.907895	20280	4	5	8	8	5.67	261625	39469	462285	chromHMM_state18_Quies Gastric human	Gastric	NA	human	GI_STOMACH	PrimaryTissue	18_Quies_E094.bed	1	59459
hyper	33	chromHMM_state18_Quies	0	0.768662	22288	4	13	4	13	7	315850	37461	408060	chromHMM_state18_Quies CD8_Memory_Primary_Cells human	CD8_Memory_Primary_Cells	NA	human	BLOOD	PrimaryCell	18_Quies_E048.bed	1	38586
hyper	25	chromHMM_state18_Quies	0	0.760951	21982	4	14	5	14	7.67	313737	37767	410173	chromHMM_state18_Quies CD4+_CD25-_CD45RO+_Memory_Primary_Cells human	CD4+_CD25-_CD45RO+_Memory_Primary_Cells	NA	human	BLOOD	PrimaryCell	18_Quies_E040.bed	1	47897
hyper	30	chromHMM_state18_Quies	0	0.753497	21631	4	15	6	15	8.33	310984	38118	412926	chromHMM_state18_Quies CD4+_CD25int_CD127+_Tmem_Primary_Cells human	CD4+_CD25int_CD127+_Tmem_Primary_Cells	NA	human	BLOOD	PrimaryCell	18_Quies_E045.bed	1	39014
hyper	69	chromHMM_state18_Quies	0	0.898441	17267	4	6	15	15	8.33	225485	42482	498425	chromHMM_state18_Quies Pancreas human	Pancreas	NA	human	PANCREAS	PrimaryTissue	18_Quies_E098.bed	1	79502
hyper	59	chromHMM_state18_Quies	0	0.775702	17871	4	11	13	13	9.33	256914	41878	466996	chromHMM_state18_Quies Pancreatic_Islets human	Pancreatic_Islets	NA	human	PANCREAS	PrimaryTissue	18_Quies_E087.bed	1	79076
hyper	92	chromHMM_state18_Quies	0	0.888962	15371	4	7	21	21	10.7	202973	44378	520937	chromHMM_state18_Quies K562_Leukemia human	K562_Leukemia	NA	human	BLOOD	PrimaryCulture	18_Quies_E123.bed	1	43488
hyper	43	chromHMM_state18_Quies	0	0.921502	14817	4	4	26	26	11.3	190783	44932	533127	chromHMM_state18_Quies Aorta human	Aorta	NA	human	VASCULAR	PrimaryTissue	18_Quies_E065.bed	1	82121
hyper	32	chromHMM_state18_Quies	0	0.716501	20275	4	22	9	22	11.7	302262	39474	421648	chromHMM_state18_Quies CD8_Naive_Primary_Cells human	CD8_Naive_Primary_Cells	NA	human	BLOOD	PrimaryCell	18_Quies_E047.bed	1	45105
hyper	71	chromHMM_state18_Quies	0	0.732666	16492	4	17	17	17	12.7	247769	43257	476141	chromHMM_state18_Quies Psoas_Muscle human	Psoas_Muscle	NA	human	MUSCLE	PrimaryTissue	18_Quies_E100.bed	1	75451
hyper	24	chromHMM_state18_Quies	0	0.678627	18008	4	29	11	29	14.7	281349	41741	442561	chromHMM_state18_Quies CD4+_CD25-_CD45RA+_Naive_Primary_Cells human	CD4+_CD25-_CD45RA+_Naive_Primary_Cells	NA	human	BLOOD	PrimaryCell	18_Quies_E039.bed	1	45132
hyper	27	chromHMM_state18_Quies	0	0.685469	16632	4	27	16	27	15.7	260679	43117	463231	chromHMM_state18_Quies CD4+_CD25-_IL17+_PMA-Ionomcyin_stimulated_Th17_Primary_Ce	CD4+_CD25-_IL17+_PMA-Ionomcyin_stimulated_Th17_Primary_Cells	NA	human	BLOOD	PrimaryCell	18_Quies_E042.bed	1	46389
hyper	68	chromHMM_state18_Quies	0	0.732687	14806	4	16	27	27	15.7	224535	44943	499375	chromHMM_state18_Quies Ovary human	Ovary	NA	human	OVARY	PrimaryTissue	18_Quies_E097.bed	1	58350
hyper	88	chromHMM_state18_Quies	0	0.808318	13350	4	9	37	37	16.7	190036	46399	533874	chromHMM_state18_Quies HMEC_Mammary_Epithelial human	HMEC_Mammary_Epithelial	NA	human	BREAST	PrimaryCulture	18_Quies_E119.bed	1	69544
hyper	53	chromHMM_state18_Quies	0	0.670419	16231	4	33	18	33	18.3	258770	43518	465140	chromHMM_state18_Quies Colon_Smooth_Muscle human	Colon_Smooth_Muscle	NA	human	GI_COLON	PrimaryTissue	18_Quies_E076.bed	1	52407
hyper	29	chromHMM_state18_Quies	0	0.67302	15305	4	32	22	32	19.3	245030	44444	478880	chromHMM_state18_Quies CD4+_CD25+_CD127-_Treg_Primary_Cells human	CD4+_CD25+_CD127-_Treg_Primary_Cells	NA	human	BLOOD	PrimaryCell	18_Quies_E044.bed	1	50043
hyper	85	chromHMM_state18_Quies	0	0.720477	13872	4	20	34	34	19.3	214000	45877	509910	chromHMM_state18_Quies GM12878_Lymphoblastoid human	GM12878_Lymphoblastoid	NA	human	BLOOD	PrimaryCulture	18_Quies_E116.bed	1	54878
hyper	5	chromHMM_state18_Quies	0	0.640225	17652	4	45	14	45	21	286490	42097	437420	chromHMM_state18_Quies H1_Derived_Neuronal_Progenitor_Cultured_Cells human	H1_Derived_Neuronal_Progenitor_Cultured_Cells	NA	human	ESC_DERIVED	ESCDerived	18_Quies_E007.bed	1	75940
hyper	44	chromHMM_state18_Quies	0	0.770076	12236	4	12	48	48	21.3	181423	47513	542487	chromHMM_state18_Quies Adult_Liver human	Adult_Liver	NA	human	LIVER	PrimaryTissue	18_Quies_E066.bed	1	74929
hyper	28	chromHMM_state18_Quies	0	0.663037	14927	4	36	25	36	21.7	242035	44822	481875	chromHMM_state18_Quies CD4+_CD25-_Th_Primary_Cells human	CD4+_CD25-_Th_Primary_Cells	NA	human	BLOOD	PrimaryCell	18_Quies_E043.bed	1	51270
hyper	45	chromHMM_state18_Quies	0	0.663147	14207	4	35	29	35	22.7	231593	45542	492317	chromHMM_state18_Quies Brain_Angular_Gyrus human	Brain_Angular_Gyrus	NA	human	BRAIN	PrimaryTissue	18_Quies_E067.bed	1	60685
hyper	6	chromHMM_state18_Quies	0	0.635609	16036	4	47	19	47	23.3	264914	43713	458996	chromHMM_state18_Quies H9_Cell_Line human	H9_Cell_Line	NA	human	ESC	PrimaryCulture	18_Quies_E008.bed	1	71207
hyper	74	chromHMM_state18_Quies	0	0.644712	14993	4	43	24	43	23.7	247529	44756	476381	chromHMM_state18_Quies Rectal_Smooth_Muscle human	Rectal_Smooth_Muscle	NA	human	GI_RECTUM	PrimaryTissue	18_Quies_E103.bed	1	50077
hyper	26	chromHMM_state18_Quies	0	0.655271	14142	4	38	30	38	24	232529	45607	491381	chromHMM_state18_Quies CD4+_CD25-_IL17-_PMA-Ionomycin_stimulated_MACS_purified_T	CD4+_CD25-_IL17-_PMA-Ionomycin_stimulated_MACS_purified_Th_Primary_Cells	NA	human	BLOOD	PrimaryCell	18_Quies_E041.bed	1	49593
hyper	95	chromHMM_state18_Quies	0	0.723946	12233	4	19	49	49	24	189898	47516	534012	chromHMM_state18_Quies NHDF-Ad_Adult_Dermal_Fibroblasts human	NHDF-Ad_Adult_Dermal_Fibroblasts	NA	human	SKIN	PrimaryCulture	18_Quies_E126.bed	1	59880
hyper	31	chromHMM_state18_Quies	0	0.661309	14047	4	37	32	37	24.3	229698	45702	494212	chromHMM_state18_Quies CD56_Primary_Cells human	CD56_Primary_Cells	NA	human	BLOOD	PrimaryCell	18_Quies_E046.bed	1	66098
hyper	55	chromHMM_state18_Quies	0	0.692256	12503	4	24	45	45	24.3	200201	47246	523709	chromHMM_state18_Quies Esophagus human	Esophagus	NA	human	GI_ESOPHAGUS	PrimaryTissue	18_Quies_E079.bed	1	75496
hyper	51	chromHMM_state18_Quies	0	0.649694	14115	4	40	31	40	25	233484	45634	490426	chromHMM_state18_Quies Brain_Substantia_Nigra human	Brain_Substantia_Nigra	NA	human	BRAIN	PrimaryTissue	18_Quies_E074.bed	1	65711
hyper	89	chromHMM_state18_Quies	0	0.731752	11762	4	18	54	54	25.3	181644	47987	542266	chromHMM_state18_Quies HSMM_Skeletal_Muscle_Myoblasts human	HSMM_Skeletal_Muscle_Myoblasts	NA	human	MUSCLE	PrimaryCulture	18_Quies_E120.bed	1	58352
hyper	82	chromHMM_state18_Quies	0	0.665678	13100	4	34	41	41	26.3	214780	46649	509130	chromHMM_state18_Quies Spleen human	Spleen	NA	human	SPLEEN	PrimaryTissue	18_Quies_E113.bed	1	63353
hyper	91	chromHMM_state18_Quies	0	0.704684	11900	4	23	53	53	26.7	188834	47849	535076	chromHMM_state18_Quies HUVEC_Umbilical_Vein_Endothelial_Cells human	HUVEC_Umbilical_Vein_Endothelial_Cells	NA	human	VASCULAR	PrimaryCulture	18_Quies_E122.bed	1	53953
hyper	70	chromHMM_state18_Quies	0	0.604739	15747	4	58	20	58	27.3	269129	44002	454781	chromHMM_state18_Quies Placenta_Amnion human	Placenta_Amnion	NA	human	PLACENTA	PrimaryTissue	18_Quies_E099.bed	1	39923
hyper	2	chromHMM_state18_Quies	0	0.553025	21101	4	77	7	77	29.3	359636	38648	364274	chromHMM_state18_Quies H1_BMP4_Derived_Mesendoderm_Cultured_Cells human	H1_BMP4_Derived_Mesendoderm_Cultured_Cells	NA	human	ESC_DERIVED	ESCDerived	18_Quies_E004.bed	1	77258
hyper	73	chromHMM_state18_Quies	0	0.635639	13106	4	46	40	46	30	221910	46643	502000	chromHMM_state18_Quies Rectal_Mucosa.Donor_31 human	Rectal_Mucosa.Donor_31	NA	human	GI_RECTUM	PrimaryTissue	18_Quies_E102.bed	1	54326
hyper	46	chromHMM_state18_Quies	0	0.642843	12559	4	44	44	44	30.7	211951	47190	511959	chromHMM_state18_Quies Brain_Anterior_Caudate human	Brain_Anterior_Caudate	NA	human	BRAIN	PrimaryTissue	18_Quies_E068.bed	1	75065
hyper	20	chromHMM_state18_Quies	0	0.612418	13644	4	54	35	54	31	235844	46105	488066	chromHMM_state18_Quies CD19_Primary_Cells_Peripheral_UW human	CD19_Primary_Cells_Peripheral_UW	NA	human	BLOOD	PrimaryCell	18_Quies_E032.bed	1	57037
hyper	14	chromHMM_state18_Quies	0	0.595789	14395	4	62	28	62	31.3	251608	45354	472302	chromHMM_state18_Quies iPS-18_Cell_Line human	iPS-18_Cell_Line	NA	human	IPSC	PrimaryCulture	18_Quies_E019.bed	1	82407
hyper	16	chromHMM_state18_Quies	0	0.588496	15196	4	67	23	67	31.3	265616	44553	458294	chromHMM_state18_Quies iPS_DF_6.9_Cell_Line human	iPS_DF_6.9_Cell_Line	NA	human	IPSC	PrimaryCulture	18_Quies_E021.bed	1	60888
hyper	18	chromHMM_state18_Quies	0	0.720239	9800	4	21	71	71	32	154984	49949	568926	chromHMM_state18_Quies Bone_Marrow_Derived_Mesenchymal_Stem_Cell_Cultured_Cells	Bone_Marrow_Derived_Mesenchymal_Stem_Cell_Cultured_Cells	NA	human	STROMAL_CONNECTIVE	PrimaryCulture	18_Quies_E026.bed	1	69313
hyper	41	chromHMM_state18_Quies	0	0.614714	13096	4	52	42	52	32.7	226942	46653	496968	chromHMM_state18_Quies Peripheral_Blood_Mononuclear_Primary_Cells human	Peripheral_Blood_Mononuclear_Primary_Cells	NA	human	BLOOD	PrimaryCell	18_Quies_E062.bed	1	49381
hyper	12	chromHMM_state18_Quies	0	0.603203	13339	4	59	38	59	33.7	233617	46410	490293	chromHMM_state18_Quies HUES64_Cell_Line human	HUES64_Cell_Line	NA	human	ESC	PrimaryCulture	18_Quies_E016.bed	1	91030
hyper	66	chromHMM_state18_Quies	0	0.683112	10298	4	28	69	69	33.7	169131	49451	554779	chromHMM_state18_Quies Left_Ventricle human	Left_Ventricle	NA	human	HEART	PrimaryTissue	18_Quies_E095.bed	1	69509
hyper	49	chromHMM_state18_Quies	0	0.633601	12104	4	48	51	51	34.3	207184	47645	516726	chromHMM_state18_Quies Brain_Inferior_Temporal_Lobe human	Brain_Inferior_Temporal_Lobe	NA	human	BRAIN	PrimaryTissue	18_Quies_E072.bed	1	67514
hyper	90	chromHMM_state18_Quies	0	0.689576	8903	4	25	75	75	34.7	146595	50846	577315	chromHMM_state18_Quies HSMMtube_Skeletal_Muscle_Myotubes_Derived_from_HSMM human	HSMMtube_Skeletal_Muscle_Myotubes_Derived_from_HSMM	NA	human	MUSCLE	PrimaryCulture	18_Quies_E121.bed	1	56601
hyper	52	chromHMM_state18_Quies	0	0.588049	14029	4	68	33	68	35	248218	45720	475692	chromHMM_state18_Quies Colonic_Mucosa human	Colonic_Mucosa	NA	human	GI_COLON	PrimaryTissue	18_Quies_E075.bed	1	43224
hyper	98	chromHMM_state18_Quies	0	0.676324	9273	4	31	73	73	36	154637	50476	569273	chromHMM_state18_Quies Osteoblasts human	Osteoblasts	NA	human	BONE	PrimaryCulture	18_Quies_E129.bed	1	63506
hyper	10	chromHMM_state18_Quies	0	0.590683	13266	4	66	39	66	36.3	235824	46483	488086	chromHMM_state18_Quies HUES48_Cell_Line human	HUES48_Cell_Line	NA	human	ESC	PrimaryCulture	18_Quies_E014.bed	1	88090
hyper	34	chromHMM_state18_Quies	0	0.686035	7853	4	26	81	81	37	130822	51896	593088	chromHMM_state18_Quies Chondrocytes_from_Bone_Marrow_Derived_Mesenchymal_Stem_Ce	Chondrocytes_from_Bone_Marrow_Derived_Mesenchymal_Stem_Cell_Cultured_Cells	NA	human	STROMAL_CONNECTIVE	PrimaryCulture	18_Quies_E049.bed	1	73350
hyper	40	chromHMM_state18_Quies	0	0.678618	8775	4	30	77	77	37	146481	50974	577429	chromHMM_state18_Quies Penis_Foreskin_Melanocyte_Primary_Cells_skin03 human	Penis_Foreskin_Melanocyte_Primary_Cells_skin03	NA	human	SKIN	PrimaryCulture	18_Quies_E061.bed	1	71191
hyper	76	chromHMM_state18_Quies	0	0.622643	11627	4	51	56	56	37	202379	48122	521531	chromHMM_state18_Quies Right_Ventricle human	Right_Ventricle	NA	human	HEART	PrimaryTissue	18_Quies_E105.bed	1	58262
hyper	97	chromHMM_state18_Quies	0	0.648504	10425	4	41	68	68	37.7	177936	49324	545974	chromHMM_state18_Quies NHLF_Lung_Fibroblasts human	NHLF_Lung_Fibroblasts	NA	human	LUNG	PrimaryCulture	18_Quies_E128.bed	1	54759
hyper	15	chromHMM_state18_Quies	0	0.58436	13094	4	69	43	69	38.7	234874	46655	489036	chromHMM_state18_Quies iPS-20b_Cell_Line human	iPS-20b_Cell_Line	NA	human	IPSC	PrimaryCulture	18_Quies_E020.bed	1	86337
hyper	50	chromHMM_state18_Quies	0	0.59639	11959	4	61	52	61	39	213968	47790	509942	chromHMM_state18_Quies Brain_Mid_Frontal_Lobe human	Brain_Mid_Frontal_Lobe	NA	human	BRAIN	PrimaryTissue	18_Quies_E073.bed	1	57484
hyper	8	chromHMM_state18_Quies	0	0.553022	13490	4	78	36	78	39.3	249936	46259	473974	chromHMM_state18_Quies hESC_Derived_CD56+_Ectoderm_Cultured_Cells human	hESC_Derived_CD56+_Ectoderm_Cultured_Cells	NA	human	ESC_DERIVED	ESCDerived	18_Quies_E012.bed	1	63312
hyper	47	chromHMM_state18_Quies	0	0.605921	11442	4	57	57	57	39.3	203452	48307	520458	chromHMM_state18_Quies Brain_Cingulate_Gyrus human	Brain_Cingulate_Gyrus	NA	human	BRAIN	PrimaryTissue	18_Quies_E069.bed	1	62165
hyper	9	chromHMM_state18_Quies	0	0.605935	11348	4	56	59	59	39.7	201961	48401	521949	chromHMM_state18_Quies hESC_Derived_CD56+_Mesoderm_Cultured_Cells human	hESC_Derived_CD56+_Mesoderm_Cultured_Cells	NA	human	ESC_DERIVED	ESCDerived	18_Quies_E013.bed	1	81099
hyper	3	chromHMM_state18_Quies	0	0.61405	10815	4	53	63	63	40	191594	48934	532316	chromHMM_state18_Quies H1_BMP4_Derived_Trophoblast_Cultured_Cells human	H1_BMP4_Derived_Trophoblast_Cultured_Cells	NA	human	ESC_DERIVED	ESCDerived	18_Quies_E005.bed	1	81322
hyper	75	chromHMM_state18_Quies	0	0.567798	12417	4	73	46	73	41	228769	47332	495141	chromHMM_state18_Quies Right_Atrium human	Right_Atrium	NA	human	HEART	PrimaryTissue	18_Quies_E104.bed	1	72148
hyper	96	chromHMM_state18_Quies	0	0.652977	8558	4	39	80	80	41	147563	51191	576347	chromHMM_state18_Quies NHEK-Epidermal_Keratinocytes human	NHEK-Epidermal_Keratinocytes	NA	human	SKIN	PrimaryCulture	18_Quies_E127.bed	1	67729
hyper	19	chromHMM_state18_Quies	0	0.597358	11161	4	60	60	60	41.3	201057	48588	522853	chromHMM_state18_Quies CD14_Primary_Cells human	CD14_Primary_Cells	NA	human	BLOOD	PrimaryCell	18_Quies_E029.bed	1	81161
hyper	67	chromHMM_state18_Quies	0	0.63162	9273	4	49	73	73	42	163106	50476	560804	chromHMM_state18_Quies Lung human	Lung	NA	human	LUNG	PrimaryTissue	18_Quies_E096.bed	1	84150
hyper	81	chromHMM_state18_Quies	0	0.567751	12135	4	74	50	74	42.7	224282	47614	499628	chromHMM_state18_Quies Thymus human	Thymus	NA	human	THYMUS	PrimaryTissue	18_Quies_E112.bed	1	42619
hyper	1	chromHMM_state18_Quies	0	0.549992	12371	4	79	47	79	43.3	233043	47378	490867	chromHMM_state18_Quies H1_Cell_Line human	H1_Cell_Line	NA	human	ESC	PrimaryCulture	18_Quies_E003.bed	1	78321
hyper	7	chromHMM_state18_Quies	0	0.591468	10563	4	63	64	64	43.7	192830	49186	531080	chromHMM_state18_Quies hESC_Derived_CD184+_Endoderm_Cultured_Cells human	hESC_Derived_CD184+_Endoderm_Cultured_Cells	NA	human	ESC_DERIVED	ESCDerived	18_Quies_E011.bed	1	88630
hyper	94	chromHMM_state18_Quies	0	0.590994	10505	4	64	65	65	44.3	191999	49244	531911	chromHMM_state18_Quies NH-A_Astrocytes human	NH-A_Astrocytes	NA	human	BRAIN	PrimaryCulture	18_Quies_E125.bed	1	60972
hyper	72	chromHMM_state18_Quies	0	0.582856	11378	4	72	58	72	44.7	208147	48371	515763	chromHMM_state18_Quies Rectal_Mucosa.Donor_29 human	Rectal_Mucosa.Donor_29	NA	human	GI_RECTUM	PrimaryTissue	18_Quies_E101.bed	1	48909
hyper	87	chromHMM_state18_Quies	0	0.645244	6716	4	42	88	88	44.7	118769	53033	605141	chromHMM_state18_Quies HepG2_Hepatocellular_Carcinoma human	HepG2_Hepatocellular_Carcinoma	NA	human	LIVER	CellLine	18_Quies_E118.bed	1	45601
hyper	77	chromHMM_state18_Quies	0	0.612314	8896	4	55	76	76	45	160855	50853	563055	chromHMM_state18_Quies Sigmoid_Colon human	Sigmoid_Colon	NA	human	GI_COLON	PrimaryTissue	18_Quies_E106.bed	1	60690
hyper	48	chromHMM_state18_Quies	0	0.590965	10472	4	65	67	67	45.3	191468	49277	532442	chromHMM_state18_Quies Brain_Hippocampus_Middle human	Brain_Hippocampus_Middle	NA	human	BRAIN	PrimaryTissue	18_Quies_E071.bed	1	69664
hyper	54	chromHMM_state18_Quies	0	0.583392	10931	4	71	61	71	45.3	200783	48818	523127	chromHMM_state18_Quies Duodenum_Smooth_Muscle human	Duodenum_Smooth_Muscle	NA	human	GI_DUODENUM	PrimaryTissue	18_Quies_E078.bed	1	64462
hyper	38	chromHMM_state18_Quies	0	0.623186	7165	4	50	86	86	46.7	129885	52584	594025	chromHMM_state18_Quies Penis_Foreskin_Keratinocyte_Primary_Cells_skin03 human	Penis_Foreskin_Keratinocyte_Primary_Cells_skin03	NA	human	SKIN	PrimaryCulture	18_Quies_E058.bed	1	66277
hyper	93	chromHMM_state18_Quies	0	0.559505	10868	4	75	62	75	47	205862	48881	518048	chromHMM_state18_Quies Monocytes-CD14+_RO01746 human	Monocytes-CD14+_RO01746	NA	human	BLOOD	PrimaryCell	18_Quies_E124.bed	1	59522
hyper	79	chromHMM_state18_Quies	0	0.584283	9802	4	70	70	70	48	182012	49947	541898	chromHMM_state18_Quies Small_Intestine human	Small_Intestine	NA	human	GI_INTESTINE	PrimaryTissue	18_Quies_E109.bed	1	50690
hyper	35	chromHMM_state18_Quies	0	0.55871	10493	4	76	66	76	48.7	199827	49256	524083	chromHMM_state18_Quies Mobilized_CD34_Primary_Cells_Female human	Mobilized_CD34_Primary_Cells_Female	NA	human	BLOOD	PrimaryCell	18_Quies_E050.bed	1	69414
hyper	64	chromHMM_state18_Quies	0	0.505481	11658	4	91	55	91	50	234641	48091	489269	chromHMM_state18_Quies Fetal_Thymus human	Fetal_Thymus	NA	human	THYMUS	PrimaryTissue	18_Quies_E093.bed	1	57788
hyper	11	chromHMM_state18_Quies	0	0.533615	9294	4	83	72	83	53	185767	50455	538143	chromHMM_state18_Quies HUES6_Cell_Line human	HUES6_Cell_Line	NA	human	ESC	PrimaryCulture	18_Quies_E015.bed	1	96747
hyper	78	chromHMM_state18_Quies	0	0.541356	8616	4	81	79	81	54.7	171836	51133	552074	chromHMM_state18_Quies Skeletal_Muscle_Female human	Skeletal_Muscle_Female	NA	human	MUSCLE	PrimaryTissue	18_Quies_E108.bed	1	53371
hyper	42	chromHMM_state18_Quies	0	0.541498	7668	4	80	83	83	55.7	154747	52081	569163	chromHMM_state18_Quies Adipose_Nuclei human	Adipose_Nuclei	NA	human	FAT	PrimaryTissue	18_Quies_E063.bed	1	74363
hyper	62	chromHMM_state18_Quies	0	0.533371	7712	4	84	82	84	56.7	157403	52037	566507	chromHMM_state18_Quies Fetal_Placenta human	Fetal_Placenta	NA	human	PLACENTA	PrimaryTissue	18_Quies_E091.bed	1	67289
hyper	39	chromHMM_state18_Quies	0	0.540353	7439	4	82	85	85	57	150818	52310	573092	chromHMM_state18_Quies Penis_Foreskin_Melanocyte_Primary_Cells_skin01 human	Penis_Foreskin_Melanocyte_Primary_Cells_skin01	NA	human	SKIN	PrimaryCulture	18_Quies_E059.bed	1	52995
hyper	57	chromHMM_state18_Quies	0	0.528107	7519	4	85	84	85	57.7	155059	52230	568851	chromHMM_state18_Quies Fetal_Intestine_Large human	Fetal_Intestine_Large	NA	human	GI_INTESTINE	PrimaryTissue	18_Quies_E084.bed	1	60712
hyper	17	chromHMM_state18_Quies	0	0.467519	8728	4	95	78	95	59	193924	51021	529986	chromHMM_state18_Quies iPS_DF_19.11_Cell_Line human	iPS_DF_19.11_Cell_Line	NA	human	IPSC	PrimaryCulture	18_Quies_E022.bed	1	67971
hyper	58	chromHMM_state18_Quies	0	0.511563	6813	4	90	87	90	60.3	145523	52936	578387	chromHMM_state18_Quies Fetal_Intestine_Small human	Fetal_Intestine_Small	NA	human	GI_INTESTINE	PrimaryTissue	18_Quies_E085.bed	1	67248
hyper	4	chromHMM_state18_Quies	0	0.517289	5556	4	88	91	91	61	119744	54193	604166	chromHMM_state18_Quies H1_Derived_Mesenchymal_Stem_Cells human	H1_Derived_Mesenchymal_Stem_Cells	NA	human	ESC_DERIVED	ESCDerived	18_Quies_E006.bed	1	59455
hyper	37	chromHMM_state18_Quies	0	0.521866	4988	4	86	94	94	61.3	107577	54761	616333	chromHMM_state18_Quies Penis_Foreskin_Fibroblast_Primary_Cells_skin02 human	Penis_Foreskin_Fibroblast_Primary_Cells_skin02	NA	human	SKIN	PrimaryCulture	18_Quies_E056.bed	1	48229
hyper	80	chromHMM_state18_Quies	0	0.490829	6372	4	92	90	92	62	141628	53377	582282	chromHMM_state18_Quies Stomach_Smooth_Muscle human	Stomach_Smooth_Muscle	NA	human	GI_STOMACH	PrimaryTissue	18_Quies_E111.bed	1	52921
hyper	60	chromHMM_state18_Quies	0	0.468706	6416	4	94	89	94	62.3	147847	53333	576063	chromHMM_state18_Quies Fetal_Muscle_Trunk human	Fetal_Muscle_Trunk	NA	human	MUSCLE	PrimaryTissue	18_Quies_E089.bed	1	52523
hyper	13	chromHMM_state18_Quies	0	0.519368	3603	4	87	98	98	63	79609	56146	644301	chromHMM_state18_Quies IMR90_Cell_Line human	IMR90_Cell_Line	NA	human	LUNG	CellLine	18_Quies_E017.bed	1	53814
hyper	36	chromHMM_state18_Quies	0	0.516931	3769	4	89	97	97	63.3	83421	55980	640489	chromHMM_state18_Quies Penis_Foreskin_Fibroblast_Primary_Cells_skin01 human	Penis_Foreskin_Fibroblast_Primary_Cells_skin01	NA	human	SKIN	PrimaryCulture	18_Quies_E055.bed	1	53439
hyper	21	chromHMM_state18_Quies	0	0.487603	4984	4	93	95	95	64	113863	54765	610047	chromHMM_state18_Quies CD3_Primary_Cells_Peripheral_UW human	CD3_Primary_Cells_Peripheral_UW	NA	human	BLOOD	PrimaryCell	18_Quies_E034.bed	1	40807
[truncated: 3 more rows]

## Sheet: 0vs5_hypo_dmCpGs
userSet	dbSet	collection	pValueLog	logOddsRatio	support	rnkPV	rnkLO	rnkSup	maxRnk	meanRnk	b	c	d	description	cellType	tissue	antibody	treatment	dataSource	filename	qValue	size
[truncated: 1,764 more rows]

[truncated: 2 more sheets: 5vs10_hyper_dmCpGs, 5vs10_hypo_dmCpGs]
